# Supplementary material for: A multi-omics study of the anti-cancer effect of a ferulic acid derivative FA-30
Source: Royal Society of Chemistry journal article supplement (doi:10.1039/d2mo00025c), 2022-07-27
Supplement: d2mo00025c1.xlsx [file d2mo00025c1.xlsx]

## Sheet: sheet1
name	M748T686	M745T50	M745T314	M185T741	M273T51	M945T49	M1045T49	M1095T50	M351T246	M721T692	M895T49	M741T313	M272T363	M173T342	M370T788	M995T49	M422T788	M716T315	M1151T62	M184T48	M744T313	M183T48	M717T316	M715T315	M244T51	M718T316	M811T62	M749T687	M252T52	M251T52	M695T50	M143T361	M896T62	M795T50	M645T50	M734T691	M581T51	M945T310	M845T50	M449T68	M259T78	M726T62	M534T67	M284T250	M657T362	M261T78	M651T364	M422T314	M420T314
N-BLANK-01.mzdata	0.388797	0.0149794	0.0420191	0.00969047	0.00346326	0.0133342	0.0124158	0.00592582	0.00888653	0.0184408	0.0139188	0.0334307	0.0110338	0	0.0107212	0.0125483	0.00914754	0.0081345	0.00621936	0.0522135	0.0403523	0.478791	0.0364067	0.023691	0.0198893	0.0143116	0.0178528	0.150983	0.0743512	0.664511	0.0131232	0.00161786	0.013087	0.0149614	0.0132805	0.0135798	0.00664557	0.0117881	0.0128323	0.0264031	0.0519598	0.0192926	0.0382641	0.0145928	0.00478642	0.0523953	0.00174149	0.0198797	0.032314
N-BLANK-02.mzdata	0.446335	0.0139887	0.0330227	0.00380781	0.00267778	0.0135203	0.0105769	0.00553584	0.00919061	0.0221753	0.0134896	0.027897	0.0479603	0.00780627	0.00986825	0.0111867	0.00827115	0.0146873	0.0054766	0.0446978	0.0409217	0.440703	0.0656748	0.0371241	0.0237746	0.0290147	0.0143969	0.170573	0.0506449	0.411865	0.0143918	0.00553074	0.0110887	0.0139716	0.0142081	0.0152854	0.00595567	0.00656296	0.0145494	0.0217915	0.0327116	0.0169567	0.0312713	0.0208794	0.0355805	0.0312472	0.0103273	0.0182521	0.0299962
N-BLANK-03.mzdata	1.22519	0.0326997	0.101154	0.00372305	0.00839042	0.0282363	0.0238386	0.0111502	0.0192236	0.0610211	0.0283585	0.10546	0.250757	0.052577	0.0235211	0.0276079	0.0200549	0.0343572	0.0129452	0.085938	0.120427	0.814212	0.156339	0.088811	0.031077	0.0666724	0.0327344	0.477881	0.0772973	0.636917	0.0294556	0.0285637	0.0261868	0.0304806	0.0268235	0.0443646	0.0129987	0.0214471	0.0299211	0.0433576	0.0287406	0.0410541	0.0643768	0.0732342	0.241941	0.023039	0.0495078	0.0199813	0.0321633
N-BLANK-04.mzdata	0.569997	0.0156837	0.0572215	0.00567473	0.00334199	0.0143802	0.0119939	0.00648377	0.0119308	0.0284175	0.0150336	0.0453794	0.134132	0.0138817	0.0127466	0.0137392	0.0100924	0.0188604	0.00614616	0.0532414	0.0516198	0.548667	0.0776711	0.0408404	0.0287191	0.0335953	0.0174653	0.20992	0.0843317	0.716561	0.017021	0.00550638	0.0144017	0.0172521	0.0153485	0.0210885	0.0071208	0.00808469	0.0157354	0.0252176	0.051645	0.0202069	0.033076	0.0321607	0.032651	0.0468597	0.0118963	0.0191699	0.02838
N-BLANK-05.mzdata	1.20048	0.0303905	0.113233	0.00438587	0.00658271	0.0309375	0.024248	0.0122206	0.0198886	0.0462227	0.0321024	0.0795784	0.230751	0.0535385	0.0167023	0.0293078	0.0219804	0.034102	0.0121856	0.06807	0.0934153	0.68235	0.136505	0.0767113	0.045898	0.0589513	0.0323971	0.419878	0.0713218	0.591617	0.0332705	0.0230943	0.0261874	0.0330296	0.0292027	0.0344076	0.0139775	0.00945755	0.0361142	0.0475369	0.0315617	0.0406221	0.0660274	0.0603874	0.214103	0.0316786	0.0514384	0.0271375	0.0425043
N-BLANK-06.mzdata	0.607759	0.0185924	0.0674762	0.00527976	0.00463644	0.0188859	0.0148169	0.00794023	0.0161041	0.0310438	0.0186536	0.0539563	0.185138	0.0309915	0.0139801	0.017	0.0133204	0.0216743	0.00691465	0.0434193	0.070362	0.436089	0.0885234	0.0481825	0.0289878	0.0378163	0.0203524	0.235284	0.053869	0.421237	0.020997	0.0120402	0.0156588	0.0206485	0.0197321	0.0200142	0.00822378	0.00883242	0.0185047	0.0327461	0.0640787	0.0268486	0.0433929	0.0379786	0.0681086	0.0633091	0.0356597	0.0229505	0.0329615
N-FA30-01.mzdata	0.264964	0.0121001	0.00564356	0.00129033	0.00296533	0.0119398	0.00930344	0.00560594	0.00327467	0.0185932	0.0115652	0.00897064	0	0.0146764	0	0.0117351	0	0.00390108	0.000189369	0.0383565	0.0103836	0.373435	0.0158703	0.00936392	0.00887857	0.00743247	0	0.114297	0.0303321	0.233846	0.0120046	0.000212863	0.000200603	0.0129823	0.0112965	0.0184193	0.00520168	0.0104606	0.0124267	0.00490618	0.0225222	0.0002249	0.00507786	0.0218762	0	0.0221163	0	0.0307193	0.0453151
N-FA30-02.mzdata	0.265607	0.00915899	0.00658734	0	0.00303403	0.00831884	0.00658088	0.0037921	0.00120475	0.0188854	0.00897569	0.00605352	0	0.00693714	0	0.00793897	0	0.00306638	0.000164606	0.0293999	0.00718347	0.293712	0.0109884	0.00647108	0.00580263	0.00457344	0.000125967	0.121932	0.0226931	0.189015	0.0090886	0.000822677	0	0.00875213	0.00901918	0.00734218	0.00409426	0.00889657	0.00888965	0.00183438	0.0143715	0.000159711	0.00167647	0.00951297	0	0.0126143	0	0.0243494	0.0376277
N-FA30-03.mzdata	0.247525	0.0102445	0.00719219	0	0.00184539	0.00838275	0.00750766	0.00383482	0.00129839	0.0173901	0.00885104	0.00588376	0	0.00763635	0	0.00789942	0	0.00294857	0.000164972	0.0227922	0.00677129	0.224757	0.0102666	0.00637455	0.00876956	0.00454516	0	0.110032	0.020283	0.170585	0.0099255	0.00070916	0	0.00876604	0.00896658	0.021925	0.00365656	0.00855015	0.00896503	0.00331326	0.0197483	0	0.00374907	0.0145934	0	0.0193254	0	0.0246624	0.0376031
N-FA30-04.mzdata	0.263508	0.009746	0.00771639	0	0.00285274	0.0078322	0.00661219	0.00391386	0.00117003	0.0190213	0.00813198	0.0055993	0	0.00786021	0	0.00686413	0	0.00264964	0.000142569	0.0305317	0.00675668	0.324088	0.0108586	0.00636366	0.00559672	0.00447511	0	0.117699	0.0177487	0.145198	0.00869949	0.000165738	0	0.00880554	0.00841355	0.0220446	0.0037797	0.00760022	0.00710473	0.00277851	0.0209732	0	0.00226648	0.0134529	0	0.020402	0	0.0236419	0.0371704
N-FA30-05.mzdata	0.309116	0.0125012	0.00921613	0.000209005	0.00374647	0.010728	0.00899473	0.00582096	0.00133051	0.0213215	0.0116659	0.00582144	0	0.0137535	0	0.00994493	0	0.00301156	0.000581228	0.0354477	0.00788456	0.336828	0.0110162	0.00695778	0.00913932	0.00526571	0	0.132292	0.025041	0.196965	0.0126675	0.000633736	0	0.0126411	0.012627	0.0256543	0.00621788	0.0131321	0.0130888	0.00404209	0.0171204	0	0.00377623	0.0256631	0	0.0171678	0	0.0265779	0.0418044
N-FA30-06.mzdata	0.29965	0.0121597	0.00997647	0	0.00242634	0.0115533	0.00818937	0.0054346	0.000377755	0.0199143	0.0113207	0.00698921	0	0.0130755	0	0.00960368	0	0.00284543	0	0.0301454	0.00773076	0.278986	0.0135601	0.00702977	0.0122252	0.00603891	0	0.128346	0.0337943	0.233995	0.0133447	0.000317044	0	0.0120227	0.0115842	0.0211084	0.00573852	0.0109939	0.0113413	0.00221392	0.0138596	0	0.00302885	0.0193983	0	0.0128384	0	0.0265822	0.0425184
[truncated: 746 more columns]

## Sheet: VIP-0
Var ID (Primary)	M1.VIP[1+1+0]	2.44693 * M1.VIP[1]cvSE
M198T344	2.17868	3.14443
M147T6	2.47328	2.49469
M135T70	2.33436	2.02559
M62T48	2.01819	1.93558
M113T311	2.70856	1.79307
M196T346	2.58913	1.68828
M415T46	2.39873	1.58267
M318T324	5.40424	1.39849
M62T6	1.07337	1.36154
M132T324	9.47022	1.25252
M113T82	2.97455	1.18925
M147T61	2.17532	1.16357
M249T308	1.61494	1.13589
M215T92	1.28204	1.10926
M310T51	1.97342	1.09203
M271T225	3.17105	1.08137
M373T47	1.92672	1.0731
M163T339	1.96523	1.06209
M388T44	2.47061	1.03816
M147T37	2.25158	1.02883
M385T308	1.34716	1.00367
M748T686	2.10543	1.00213
M317T307	1.34803	0.995622
M201T51	1.45064	0.967413
M521T307	0.621321	0.963726
M589T306	0.507534	0.961889
M453T307	0.804029	0.951006
M328T360	1.94428	0.933274
M161T340	1.93894	0.919438
M181T310	0.853891	0.888734
M442T50	1.21983	0.886288
M352T47	1.16364	0.858759
M69T82	2.02149	0.85081
M130T6	0.68552	0.80636
M217T92	0.535589	0.80179
M302T787	3.8758	0.797159
M657T307	0.341293	0.783156
M666T39	0.471145	0.772212
M416T46	1.12195	0.74299
M635T362	1.88849	0.727027
M192T223	2.105	0.721211
M471T48	1.04572	0.713888
M566T707	2.26354	0.702413
M146T319	5.93492	0.695335
M725T307_2	0.209656	0.684251
M174T53	0.925773	0.675401
M179T91	0.652224	0.673174
M265T52	1.47654	0.667909
M283T251	1.48174	0.666196
M89T50	0.908349	0.665923
M749T687	1.22731	0.661421
M209T225	2.8168	0.656338
M165T343	1.03132	0.655475
M113T50	1.03742	0.655226
M540T710	2.18686	0.631566
M181T122	0.590144	0.628746
M861T307	0.191645	0.628241
M251T52	1.80639	0.61127
M374T45	0.689561	0.606016
M183T48	1.52749	0.602415
M137T70	1.15781	0.592742
M511T294	0.437515	0.581006
M657T362	0.990825	0.577545
M466T50	0.71219	0.575125
M473T48	0.886578	0.573189
M398T46	0.778821	0.572984
M579T295	0.435822	0.55682
M287T327	1.76011	0.550153
M929T303	0.20047	0.549362
M389T44	1.25699	0.539839
M793T305	0.121088	0.536998
M245T756	2.0274	0.53542
M200T344	1.07416	0.53294
M443T293	0.498392	0.530399
M667T39	0.318976	0.529747
M157T50	0.857688	0.526865
M249T83	0.836433	0.526031
M647T294	0.362223	0.519368
M131T364	0.92261	0.511775
M311T48	0.854529	0.500861
M334T250	0.772811	0.500577
M319T326	1.99444	0.498319
M89T89	0.637871	0.496933
M447T156	0.259562	0.487424
M281T51	0.424176	0.48646
M218T58	1.48997	0.470069
M293T82	0.595548	0.464572
M315T319	1.20167	0.464275
M443T50	0.614947	0.460611
M283T45	0.816266	0.454113
M217T326	0.806791	0.440606
M272T363	1.12828	0.432469
M741T310	0.232045	0.430176
M767T307	0.861673	0.428731
M285T251	0.857385	0.428364
M130T316	0.485577	0.426692
M515T49	0.983735	0.426253
M306T362	9.19872	0.424067
M451T44	0.852072	0.422362
M242T787	2.14573	0.422336
M309T52	0.710339	0.420834
M402T61	0.513479	0.417978
M500T399	1.78126	0.415135
M214T740	2.98594	0.413314
M400T50	0.792989	0.412478
M283T316	0.81583	0.410002
M145T372	2.57341	0.40974
M111T69	0.616539	0.408172
M179T51	0.247756	0.406662
M568T706	1.01505	0.406153
M215T245	0.991155	0.405491
M404T45	0.835352	0.400297
M723T305	0.655194	0.39866
M327T155	0.662243	0.395451
M215T897	0.676605	0.39471
M307T292	0.76354	0.394582
M567T707	1.23319	0.393417
M181T83	0.629875	0.392305
M232T6	0.626581	0.3877
M404T362	0.59644	0.387528
M715T295	0.262696	0.385289
M541T710	1.14805	0.384031
M419T314	0.593018	0.38359
M487T61	0.497116	0.37714
M333T311	0.657715	0.374582
M101T52	0.646734	0.371208
M636T363	0.975956	0.371173
M277T244	0.469206	0.366795
M228T825	2.82222	0.364685
M472T48	0.502967	0.364583
M765T306	0.842469	0.359772
M319T787	1.29457	0.359689
M417T46	0.422277	0.357427
M127T50	0.69442	0.355746
M130T244	0.604041	0.354892
M449T44	0.663281	0.354009
M273T225	1.02378	0.352557
M115T49	0.804374	0.3522
M517T49	0.834324	0.351569
M346T47	0.723167	0.348958
M204T56	0.317531	0.341254
M261T78	0.437641	0.341093
M572T61	0.461844	0.340545
M149T43	0.165703	0.338866
M119T52	0.336817	0.337312
M469T310	0.58379	0.336774
M538T712	1.21771	0.336112
M720T690	0.838612	0.335418
M313T50	0.455594	0.334352
M126T52	0.618913	0.331489
M748T294	2.07903	0.329551
M200T315	0.102473	0.32921
M124T225	7.90111	0.328904
M605T310	0.494942	0.327417
M421T314	0.480952	0.326674
M435T314	0.678606	0.325423
M182T55	0.287597	0.324446
M668T39	0.189357	0.323303
M331T319	0.575836	0.322907
M365T47	0.622572	0.322138
M231T319	0.319961	0.321952
M743T313	1.18015	0.321785
M259T78	0.454059	0.321522
M537T310	0.546489	0.319652
M201T316	0.277486	0.319064
M588T705	0.577416	0.31844
M128T68	1.54847	0.317414
M329T155	0.483192	0.31699
M249T225	1.54031	0.316534
M564T709	1.06066	0.315574
M470T61	0.444191	0.314903
M480T403	1.99183	0.313402
M825T309	0.099858	0.313219
M181T51	0.362393	0.311648
M395T52	0.426925	0.310422
M145T77	0.51764	0.307425
M424T50	0.605336	0.305888
M126T225	1.6014	0.304435
M436T390	1.27286	0.303109
M385T62	0.438734	0.301216
M159T50	0.246159	0.301171
M198T251	1.04849	0.300576
M337T320	0.632018	0.299771
M478T405	2.50374	0.298901
M717T316	0.863444	0.296159
M340T326	0.816432	0.295593
M317T61	0.40363	0.294712
M240T50	0.621183	0.294292
M463T48	0.807539	0.293528
M401T310	0.528696	0.293301
M269T50	0.410151	0.292131
M555T61	0.421416	0.291891
M461T48	0.795453	0.290126
M768T306	0.606713	0.289689
M851T295	0.181371	0.288878
M805T486	1.19591	0.288746
M809T309	0.334521	0.288003
M657T61	0.443325	0.287336
M618T50	0.388524	0.285571
M433T44	0.463001	0.285541
M232T61	0.600847	0.283964
M191T323	1.08664	0.28394
M559T787	0.94482	0.282998
M422T50	0.236308	0.282373
M919T295	0.155672	0.281583
M673T309	0.434109	0.281006
M353T319	0.475711	0.280918
M323T324	0.690991	0.28051
M265T312	0.694424	0.280271
M405T45	0.458236	0.280117
M216T91	0.331894	0.27994
M301T324	1.6985	0.278092
M418T224	1.25338	0.277611
M234T251	0.22602	0.27686
M284T250	0.468781	0.27415
M474T48	0.448625	0.274021
M187T48	0.411708	0.273056
M317T323	0.682413	0.272947
M721T692	0.384546	0.272718
M204T318	0.484413	0.272486
M203T317	0.431227	0.27239
M437T314	0.590065	0.2707
M724T304	0.440688	0.270185
M741T313	0.68949	0.269393
M320T325	1.42348	0.268803
M569T706	0.524172	0.268338
M640T61	0.387783	0.267006
M134T324	0.805902	0.266539
M720T304	0.626437	0.266167
M303T787	1.26002	0.265606
M136T54	0.642447	0.264802
M766T306	0.581629	0.26431
M266T52	0.57542	0.263284
M742T61	0.43242	0.261453
M202T51	0.400252	0.260714
M411T50	0.205743	0.260341
M503T315	0.00718731	0.259797
M195T52	0.489256	0.259126
M436T316	0.279926	0.257606
M1133T309	0.270579	0.257363
M190T324	0.456212	0.256668
M621T310	0.41982	0.25508
M488T48	1.25743	0.254456
M289T93	0.448209	0.253798
M744T313	0.757751	0.253379
M445T51	0.397857	0.25216
M293T52	0.749523	0.251386
M272T225	0.850468	0.251339
M297T91	0.419876	0.251039
M576T51	0.410954	0.250862
M445T156	0.416075	0.249229
M783T294	0.200283	0.249121
M816T787	0.565658	0.248804
M230T360	0.264628	0.248482
M480T50	0.25876	0.248046
M475T49	0.389565	0.247988
M725T61	0.372829	0.247512
M131T51	0.3858	0.246689
M239T292	0.598819	0.246485
M334T84	0.40596	0.245897
M187T91	0.172068	0.244829
M425T788	0.631202	0.244614
M751T302	0.704562	0.242318
M538T62	0.337653	0.241793
M827T61	0.424646	0.241723
M467T45	0.16586	0.240188
M462T385	1.02659	0.240019
M231T52	0.479482	0.239748
M102T320	0.756438	0.239435
M565T225	0.971251	0.238672
M507T49	0.411297	0.238619
M521T224	0.628907	0.235931
M151T90	0.238336	0.235849
M623T62	0.34589	0.235224
M239T90	0.395963	0.234764
M184T48	0.48867	0.234275
M895T310	0.10903	0.23399
M637T367	0.726193	0.233282
M344T47	0.42417	0.233058
M553T310	0.454626	0.232996
M485T311	0.477472	0.232462
M369T318	0.321152	0.231952
M708T62	0.347129	0.230813
M213T68	0.931731	0.228926
M516T49	0.517959	0.228682
M327T73	0.376496	0.228416
M464T383	1.23536	0.227556
M256T251	0.746024	0.227331
M375T319	0.176525	0.226367
M526T398	0.625116	0.22612
M285T313	0.512298	0.226015
M715T315	0.647757	0.224765
M407T46	0.438493	0.224029
M225T51	0.36228	0.222987
M148T318	0.580867	0.219527
M375T45	0.216673	0.218182
M793T62	0.325276	0.217323
M651T364	0.49728	0.216962
M401T49	0.371164	0.216582
M473T94	0.283468	0.216294
M266T314	0.455943	0.216037
M196T69	0.492452	0.215826
M189T319	0.530244	0.21517
M242T50	0.19207	0.214886
M945T310	0.113098	0.214885
M498T403	1.26039	0.214838
M745T314	0.754953	0.214741
M557T710	0.741425	0.214217
M912T61	0.400755	0.213537
M757T310	0.336508	0.213411
M333T773	0.436364	0.213178
M133T69	1.88834	0.211542
M141T79	0.224762	0.211132
M479T404	1.268	0.209913
M79T77	0.414506	0.209427
M226T318	0.297685	0.209322
M173T342	0.416772	0.20926
M689T310	0.359848	0.208717
M450T45	0.335966	0.208571
M506T46	0.332145	0.208554
M337T51	0.383068	0.207992
M810T61	0.355794	0.207796
M348T47	0.389783	0.207384
M200T251	0.58728	0.206892
M749T294	1.36646	0.20596
M285T162	0.91977	0.205115
M301T161	0.510246	0.205101
M776T62	0.293123	0.205057
M236T251	0.181972	0.20477
M307T90	0.348821	0.204488
M312T740	1.17401	0.204146
M163T72	0.496967	0.203597
M524T396	0.689567	0.203116
M372T44	0.502971	0.202599
M501T399	0.94947	0.201829
M469T163	0.399287	0.201452
M691T62	0.287284	0.200964
M164T77	0.287895	0.19923
M252T52	0.614744	0.19808
M774T292	0.700731	0.197994
M381T51	0.426218	0.197675
M353T52	0.267671	0.197552
M718T316	0.562226	0.197046
M325T59	0.843726	0.196908
M256T313	0.338128	0.196362
M518T49	0.391323	0.195221
M487T309	0.362456	0.194682
M402T45	0.362265	0.19405
M182T214	1.78873	0.193784
M868T787	0.676668	0.193697
M222T74	0.379479	0.193144
M102T52	0.200264	0.193067
M452T44	0.45433	0.193041
M611T787	0.900793	0.192838
M505T315	0.069567	0.192442
M583T706	0.706062	0.192188
M752T303	0.478045	0.192134
M543T225	0.805522	0.192122
M504T309	0.148017	0.191857
M101T90	0.441163	0.191666
M763T306	0.503567	0.19131
M420T45	0.394945	0.190852
M114T82	0.449419	0.19063
M316T251	0.250451	0.190003
M545T162	0.483402	0.189779
M143T361	0.341961	0.18968
M746T689	0.374797	0.189381
M642T308	0.306634	0.189353
M203T370	0.430295	0.189043
M258T251	0.585667	0.18901
M544T57	0.339362	0.18871
M1252T61	0.172895	0.188668
M734T691	0.255766	0.188627
M877T310	0.164549	0.187832
M431T51	0.31691	0.187714
M268T45	0.360674	0.187659
M286T53	0.25181	0.187102
M117T49	0.850924	0.186887
M168T315	0.280445	0.185757
M279T68	0.276573	0.185051
M149T78	0.178947	0.184703
M997T61	0.398607	0.184554
M129T52	1.29829	0.184327
M223T43	0.126975	0.184153
M133T324	2.07788	0.183503
M1010T50	0.307457	0.183494
M199T315	0.0998703	0.183022
M128T320	1.70365	0.182942
M530T710	0.575304	0.182805
M459T57	0.272806	0.182707
M139T48	0.388144	0.182334
M420T314	0.23963	0.182306
M166T77	0.339703	0.181507
M599T94	0.277146	0.181441
M88T325	1.99498	0.181024
M529T164	0.324614	0.180988
M258T89	0.327144	0.180701
M359T320	0.242256	0.180313
M471T164	0.374935	0.180293
M878T62	0.318554	0.179731
M354T787	2.51366	0.179662
M336T313	0.138421	0.179459
M845T50	0.323232	0.178867
M619T50	0.266642	0.178855
M664T39	0.121217	0.178625
M612T703	0.196067	0.177376
M490T48	1.03473	0.177247
M539T711	0.649334	0.177133
M415T94	0.257434	0.176723
M587T164	0.272455	0.176666
M589T95	0.322255	0.17654
M614T705	0.216382	0.176501
M527T164	0.299864	0.176334
M629T57	0.295746	0.17488
M247T320	0.390272	0.174452
M166T288	0.482256	0.174073
M542T710	0.531954	0.172015
M417T313	0.454106	0.171552
M237T74	0.239141	0.171208
M895T62	0.339412	0.170899
M287T162	0.768426	0.170781
M402T787	0.62328	0.170617
M312T48	0.316997	0.170511
M747T690	0.225441	0.170491
M266T244	0.46365	0.169152
M759T62	0.238406	0.166586
M166T384	0.292537	0.166275
M556T707	0.633631	0.165457
M377T52	0.220916	0.165198
M439T315	0.296956	0.165164
M427T61	1.16772	0.165154
M980T62	0.309434	0.164827
M1013T306	0.0935484	0.164722
M844T62	0.262262	0.164098
M540T316	0.544271	0.163621
M604T50	0.266098	0.163599
M519T50	0.366343	0.163479
M226T287	0.472365	0.162884
M314T45	0.305281	0.162631
M1082T61	0.349781	0.161972
M314T251	0.329506	0.161852
M114T325	0.899436	0.161331
M235T53	0.46891	0.161258
M129T314	0.661723	0.160831
M280T824	1.81447	0.160641
M773T303	0.31067	0.160413
M366T47	0.309581	0.160097
M303T324	0.686187	0.159793
M357T45	0.227234	0.159603
M1020T41	0.184644	0.159374
M422T314	0.194533	0.159196
M827T470	0.450586	0.159073
M525T396	0.392034	0.1588
M476T49	0.295722	0.158395
M390T45	0.310262	0.158363
M438T317	0.318767	0.157933
M292T787	0.75813	0.157531
M316T321	0.349017	0.15682
M239T43	0.25576	0.156615
M345T52	0.376027	0.156576
M493T50	0.313886	0.156565
M434T45	0.292021	0.156188
M145T53	0.169434	0.155506
M206T319	0.280561	0.15548
M946T62	0.287945	0.154859
M258T55	0.19205	0.154799
M599T48	0.57034	0.154084
M1125T787	0.36105	0.154062
M745T50	0.31286	0.153604
M565T709	0.597011	0.153405
M283T162	0.701425	0.153084
M589T705	0.339928	0.151189
M132T51	0.156065	0.150938
M349T313	0.477675	0.15088
M229T50	0.344538	0.150047
M284T314	0.304566	0.149346
M347T48	0.279362	0.149131
M431T787	0.415967	0.149057
M452T411	1.16809	0.148702
M118T331	0.75116	0.148646
M886T299	0.783238	0.147903
M489T48	0.603814	0.147246
M586T707	0.552375	0.147141
M485T162	0.476131	0.147113
M465T47	0.53644	0.147063
M995T49	0.304979	0.147021
M429T740	0.38086	0.146957
M282T314	0.650602	0.146831
M127T373	0.670825	0.146396
M1065T62	0.291653	0.146322
M640T705	0.313703	0.145784
M125T309	0.139818	0.14572
M560T787	0.413242	0.14554
M712T225	0.620362	0.145346
M535T161	0.371098	0.145334
M895T49	0.312017	0.145237
M599T60	0.198202	0.145223
M963T62	0.308834	0.144887
M215T741	0.711948	0.144877
M543T162	0.415242	0.144734
M253T318	0.200863	0.144527
M659T95	0.248926	0.144173
M339T314	0.10269	0.143646
M893T304	0.153442	0.143001
M246T756	0.547568	0.142942
M186T51	0.099998	0.142566
M1031T62	0.255994	0.14228
M838T165	0.31678	0.142144
M764T307	0.360983	0.141891
M716T315	0.415396	0.140983
M300T785	0.703406	0.140719
M433T92	0.230546	0.140719
M501T312	0.377445	0.140354
M397T52	0.266694	0.13914
M320T50	1.18499	0.139114
M864T302	0.488762	0.138865
M562T711	0.533042	0.138806
M714T57	0.268957	0.138615
M451T67	0.226987	0.13855
M717T96	0.21185	0.138222
M462T48	0.389832	0.137873
M188T244	0.352482	0.137294
M295T163	0.593803	0.137229
M645T163	0.242979	0.136686
M180T78	0.118765	0.13668
M512T715	0.521142	0.136476
M725T307_1	0.305577	0.136388
M216T244	0.256187	0.136172
M637T310	0.371788	0.136143
M323T757	0.956103	0.136095
M545T51	0.325624	0.135987
M130T385	1.41341	0.135325
M343T44	0.349559	0.135063
M621T63	0.200751	0.134946
M620T706	0.586404	0.134946
M663T164	0.31607	0.134675
M425T50	0.176803	0.134411
M268T314	0.262855	0.134186
M418T310	0.160445	0.133721
M289T56	0.215168	0.13294
M162T324	0.294005	0.132823
M695T50	0.314424	0.132566
M945T49	0.311094	0.132284
M791T304	0.400084	0.132
M569T311	0.389544	0.13199
M185T741	0.212489	0.131984
M349T46	0.309353	0.131915
M435T45	0.243621	0.13181
M795T50	0.324787	0.131424
M307T363	3.18835	0.131344
M705T308	0.330239	0.130973
M267T52	0.382011	0.130741
M452T788	0.72551	0.130564
M553T65	0.245244	0.129684
M271T46	0.273307	0.128966
M837T60	0.167315	0.128905
M305T49	0.114344	0.128889
M817T787	0.308592	0.128809
M350T51	0.639789	0.128198
M571T48	0.281415	0.12779
M585T164	0.261686	0.127735
M411T164	0.358021	0.127714
M115T324	1.70306	0.127643
M609T93	0.232192	0.127358
M1167T61	0.309751	0.126995
M391T45	0.144839	0.126607
M1048T62	0.26723	0.126537
M799T57	0.231232	0.125935
M284T287	0.321448	0.125386
M158T51	0.198065	0.125354
M243T787	0.622545	0.124862
M71T324	0.674601	0.12478
M338T51	0.139074	0.124728
M1045T49	0.284749	0.124355
M464T48	0.376906	0.123807
M489T311	0.299212	0.123216
M595T51	0.302338	0.123083
M645T50	0.298578	0.123068
M295T51	0.335582	0.122899
M691T309	0.195009	0.122821
M476T409	1.17615	0.122536
M862T302	0.523981	0.122414
M255T46	0.310562	0.12229
M392T326	0.789739	0.121843
M244T51	0.431981	0.121299
M666T252	0.111013	0.121222
M356T46	0.263254	0.120497
M189T57	0.399147	0.120403
M164T316	0.417774	0.120229
M592T710	1.2783	0.119909
M423T314	0.175938	0.119758
M409T46	0.208764	0.119579
M746T293	0.521519	0.119547
M227T49	0.393779	0.119276
M331T52	0.331437	0.118816
M372T251	0.223549	0.118493
M298T67	0.333857	0.117844
M366T68	0.231753	0.117425
M299T315	0.220941	0.11723
M465T52	0.413432	0.11682
M666T704	0.133654	0.116343
M367T316	0.424405	0.115114
M831T476	0.719655	0.115057
M481T402	0.995306	0.114297
M334T315	0.380421	0.113837
M690T710	0.457542	0.113613
M638T65	0.180489	0.11228
M468T66	0.286519	0.11222
M603T163	0.383945	0.112201
M374T251	0.272151	0.111746
M600T48	0.458403	0.111658
M966T787	0.398199	0.111511
M869T787	0.370699	0.111484
M172T55	0.26569	0.111348
M406T45	0.268286	0.111113
M156T51	0.155093	0.111071
M387T309	0.16569	0.110903
M684T60	0.21954	0.11086
M481T51	0.281411	0.11076
M539T50	0.264815	0.110557
M865T302	0.327358	0.110036
M185T49	0.187384	0.109718
M1150T62	0.261832	0.108892
M816T294	0.640549	0.108774
M378T52	0.104133	0.108751
M351T316	0.429423	0.108722
M418T45	0.226331	0.107417
M330T46	0.319434	0.107052
M308T72	0.618724	0.106981
M887T299	0.56566	0.106762
M294T52	0.340807	0.105827
M1116T62	0.271607	0.105698
M335T53	0.307866	0.105218
M490T251	0.168487	0.10485
M608T251	0.0517533	0.104566
M241T50	0.296503	0.104153
M249T338	0.135629	0.104068
M374T787	0.416901	0.103588
M300T61	0.285542	0.103468
M703T164	0.210354	0.103188
M884T57	0.211787	0.10305
M835T61	0.357869	0.102749
M618T707	1.33491	0.102446
M818T163	0.199081	0.10209
M383T66	0.308372	0.101838
M226T49	0.109749	0.100813
M775T292	0.48092	0.100359
M410T59	0.789868	0.0999888
M487T162	0.450444	0.0996507
M161T50	0.301641	0.0987039
M432T252	0.17192	0.0981513
M621T706	0.311244	0.097849
M273T51	0.140539	0.0968996
M477T45	0.0376918	0.0965576
M538T316	0.644429	0.0960964
M263T348	0.2551	0.0959568
M534T67	0.634313	0.0954074
M888T300	0.47021	0.0950652
M1133T62	0.260484	0.0948909
M171T48	0.22303	0.0948627
M302T50	0.851112	0.0946746
M243T50	0.130241	0.0938315
M403T45	0.199603	0.0934067
M453T48	0.278559	0.0932656
M835T305	0.392247	0.0931058
M321T50	0.362568	0.0930924
M1099T62	0.228525	0.0927673
M726T62	0.50734	0.092336
M541T313	0.328051	0.0920511
M410T46	0.262817	0.0914952
M539T315	0.378862	0.0913485
M245T73	0.22208	0.0911791
M581T51	0.20427	0.0909767
M461T163	0.241222	0.09073
M308T363	2.12977	0.0904992
M491T48	0.503449	0.0904701
M304T787	0.568257	0.0898973
M512T62	0.769105	0.0896219
M506T788	0.415967	0.0896175
M391T322	0.12081	0.0893505
M531T51	0.235469	0.0893178
M393T326	0.322483	0.0892749
M292T51	0.1463	0.0892728
M168T824	2.19177	0.0888983
M219T89	0.158661	0.0883393
M961T302	0.110825	0.0882463
M449T68	0.527017	0.0876902
M580T60	0.576514	0.0868189
M299T161	0.423283	0.086083
M869T62	0.230172	0.0859585
M776T292	0.746853	0.0848879
M884T299	0.576578	0.0848099
M492T48	0.465618	0.0847058
M293T163	0.526144	0.0845736
M777T292	0.495454	0.083528
M294T787	0.438529	0.0833546
M361T50	0.354838	0.0828324
M267T314	0.18193	0.0826219
M622T304	0.110036	0.082617
M836T304	0.378298	0.0824985
M760T163	0.16014	0.0824892
M750T294	0.746786	0.0819711
M303T161	0.475476	0.0815914
M173T50	0.321786	0.0812906
M863T301	0.389556	0.080306
M422T788	0.359247	0.0801081
M750T61	0.417287	0.079459
M1095T50	0.182538	0.0790955
M370T788	0.367628	0.0790173
M760T292	0.141686	0.0788674
M155T53	0.123415	0.0788444
M73T49	0.359663	0.0786149
M541T48	0.392826	0.0774633
M225T161	0.446626	0.0774241
M343T162	0.379643	0.0772493
M363T50	0.341714	0.0765136
M195T327	0.557123	0.0759465
M601T48	0.251964	0.0756624
M227T161	0.514508	0.0750871
M408T787	0.42634	0.075055
M612T787	0.453301	0.0748452
M233T52	0.308897	0.0744599
M427T162	0.387433	0.0743291
M724T252	0.14137	0.0736484
M726T252	0.114697	0.0732817
M593T710	0.674276	0.0729839
M351T246	0.342659	0.072126
M180T316	0.481799	0.0714355
M554T306	0.114617	0.0713707
M817T293	0.434935	0.0710175
M820T288	0.605286	0.0706906
M896T62	0.407529	0.070598
M359T161	0.361832	0.0703914
M616T709	0.629421	0.0701757
M183T315	0.0972898	0.070121
M417T162	0.33093	0.0694144
M121T50	0.134013	0.0693517
M333T51	0.133958	0.0691009
M454T787	0.44031	0.0688343
M721T294	0.521791	0.0681364
M342T50	0.96274	0.0681082
M833T306	0.343884	0.0679769
M495T55	0.593294	0.0679308
M673T289	0.296951	0.0676513
M811T62	0.459849	0.0671913
M419T161	0.341335	0.0667285
M665T60	0.484614	0.0663606
M477T162	0.391989	0.0657275
M860T302	0.261281	0.0654836
M311T162	0.373697	0.0646919
M248T51	0.255525	0.0634469
M140T740	0.460632	0.0633359
M920T61	0.293892	0.0628486
M253T52	0.281733	0.0624962
M604T67	0.130401	0.0617693
M590T711	0.734388	0.0615381
M551T161	0.322822	0.061345
M954T299	0.237136	0.061251
M734T294	0.308663	0.0605612
M1151T62	0.275576	0.0596115
M866T287	0.432308	0.0583714
M885T299	0.42927	0.0580304
M709T787	0.587602	0.0565475
M1029T753	0.150459	0.0564622
M619T707	0.732291	0.055494
M889T300	0.309287	0.0554226
M289T161	0.419683	0.0542785
M617T709	0.366606	0.0537881
M138T54	0.141864	0.0530042
M902T772	0.327227	0.0522745
M609T161	0.317544	0.0507228
M724T162	0.339484	0.0505261
M867T287	0.323571	0.0501272
M401T163	0.246484	0.0499986
M250T51	0.191123	0.0490013
M821T288	0.436199	0.0485
M303T59	0.65229	0.0462057
M822T288	0.374518	0.0461583
M536T67	0.15749	0.0458427
M719T294	0.365259	0.0458036
M111T161	0.570374	0.0453693
M368T62	0.296751	0.041976
M355T787	0.782454	0.0418748
M813T293	0.161666	0.039501
M762T293	0.36507	0.0385623
M868T287	0.332881	0.0377002
M960T770	0.420125	0.0366712
M291T73	0.492116	0.0349151
M912T299	0.327604	0.0347883
M356T787	0.409167	0.0340045
M842T292	0.212428	0.0314231
M499T43	0.0622566	0.0303424
M959T770	0.409492	0.0298152
M723T65	0.139224	0.0257318

## Sheet: VIP>1
Var ID (Primary)	2.44693 * M1.VIP[1]cvSE	N-BLANK-01.mzdata	N-BLANK-02.mzdata	N-BLANK-03.mzdata	N-BLANK-04.mzdata	N-BLANK-05.mzdata	N-BLANK-06.mzdata	N-FA30-01.mzdata	N-FA30-02.mzdata	N-FA30-03.mzdata	N-FA30-04.mzdata	N-FA30-05.mzdata	N-FA30-06.mzdata	P value
M113T311	1.79307	1.02762	0.705243	1.93905	1.49708	2.88827	1.86127	1.31969	0.663577	0.691424	0.674641	0.662292	0.877365	0.0300923
M113T82	1.18925	1.43745	1.22561	2.62633	1.43815	2.54048	1.71496	1.24669	0.769483	0.773715	0.729604	0.950243	0.911635	0.00479259
M132T324	1.25252	9.6291	8.30908	10.6299	8.27075	11.1513	10.1833	0.402961	0.0661892	0.0863784	0.0806423	0.150771	0.142772	2.91161e-09
M135T70	2.02559	1.02284	0.976751	1.61373	1.11277	2.71938	1.50323	0.859739	0.560174	1.02958	0.7324	0.902687	1.04354	0.0450717
M147T37	1.02883	0.649027	1.09692	1.57629	1.27942	1.81962	1.22584	0.91388	0.511619	0.483512	0.511534	0.966081	0.626641	0.00884914
M147T6	2.49469	1.40342	0.825882	1.62023	1.04705	2.93673	0.925639	0.9836	0.517587	0.950844	0.466733	0.675595	0.669172	0.0474378
M147T61	1.16357	1.40904	1.25613	2.90768	1.49579	2.68835	1.73436	2.06517	1.22937	1.44602	1.39752	1.76918	1.55625	0.304714
M163T339	1.06209	0.267987	0.718637	1.84851	0.321018	1.6123	0.818781	1.44507	1.10399	1.09044	1.03767	1.2185	1.18751	0.387175
M196T346	1.68828	0.0745478	0.227704	2.15383	0.26736	1.97235	0.413194	0.398575	0.237441	0.233527	0.218432	0.312552	0.306275	0.173974
M198T344	3.14443	0.0949171	0.258007	2.69991	0.334518	1.00834	0.465225	0.57013	0.32714	0.321931	0.308149	0.434697	0.427372	0.328464
M215T92	1.10926	0.460184	0.231927	0.162479	0.40611	0.286175	0.632406	0.165931	0.0994196	0.141246	0.168508	0.173067	0.10517	0.0112758
M249T308	1.13589	0.485291	0.327299	0.735477	0.669563	1.16238	0.788356	0.62497	0.275856	0.333093	0.285509	0.31228	0.430418	0.0332947
M271T225	1.08137	1.60887	0.982612	1.16906	0.867296	1.05357	0.867605	0.000195597	0	0	0	0	0	2.29667e-06
M310T51	1.09203	0.0173795	0.0225782	0.0342323	0.0245416	0.0409441	0.0310382	0.744278	0.472798	0.567672	0.271458	0.388631	0.378477	7.05563e-05
M318T324	1.39849	3.56063	3.08143	3.34548	3.08489	2.74789	2.90889	0.00102482	0	0	0	0	0	1.5995e-10
M373T47	1.0731	0.0122106	0.0103902	0.0165425	0.0144584	0.0188539	0.0128022	0.728573	0.353078	0.57495	0.285899	0.350707	0.35567	0.000117994
M385T308	1.00367	0.28941	0.17351	0.265523	0.316037	0.539241	0.368588	0.363962	0.0142412	0.0124731	0.0134776	0.0135145	0.0109106	0.00809697
M388T44	1.03816	0.886756	1.01367	1.81679	1.15118	1.99974	1.49312	0.820705	0.727304	0.644089	0.644555	0.835759	0.729784	0.00548044
M415T46	1.58267	0.00188	0.00190041	0.00222274	0.00103134	0.00487803	0.00379148	1.33965	0.952358	0.724664	0.514107	0.415367	0.325728	0.00105355
M62T48	1.93558	0.27554	0.212007	0.516745	0.244958	0.549795	0.295773	1.50767	0.939571	1.00904	0.631037	0.621039	0.529657	0.00849025
M62T6	1.36154	0.478387	0	0	0.295302	0.522987	0.355523	0	0	0.175879	0	0.224627	0	0.0693707
M748T686	1.00213	0.388797	0.446335	1.22519	0.569997	1.20048	0.607759	0.264964	0.265607	0.247525	0.263508	0.309116	0.29965	0.0127069

## Sheet: VIP>1 P<0.05
Var ID (Primary)	mzmed	rtmed	2.44693 * M1.VIP[1]cvSE	N-BLANK-01.mzdata	N-BLANK-02.mzdata	N-BLANK-03.mzdata	N-BLANK-04.mzdata	N-BLANK-05.mzdata	N-BLANK-06.mzdata	N-FA30-01.mzdata	N-FA30-02.mzdata	N-FA30-03.mzdata	N-FA30-04.mzdata	N-FA30-05.mzdata	N-FA30-06.mzdata	P value
M113T311	112.986	5.182	1.79307	1.02762	0.705243	1.93905	1.49708	2.88827	1.86127	1.31969	0.663577	0.691424	0.674641	0.662292	0.877365	0.0300923
M113T82	112.986	1.365	1.18925	1.43745	1.22561	2.62633	1.43815	2.54048	1.71496	1.24669	0.769483	0.773715	0.729604	0.950243	0.911635	0.00479259
M132T324	132.03	5.404	1.25252	9.6291	8.30908	10.6299	8.27075	11.1513	10.1833	0.402961	0.0661892	0.0863784	0.0806423	0.150771	0.142772	2.91161e-09
M135T70	134.895	1.166	2.02559	1.02284	0.976751	1.61373	1.11277	2.71938	1.50323	0.859739	0.560174	1.02958	0.7324	0.902687	1.04354	0.0450717
M147T37	146.966	0.613	1.02883	0.649027	1.09692	1.57629	1.27942	1.81962	1.22584	0.91388	0.511619	0.483512	0.511534	0.966081	0.626641	0.00884914
M147T6	146.966	0.095	2.49469	1.40342	0.825882	1.62023	1.04705	2.93673	0.925639	0.9836	0.517587	0.950844	0.466733	0.675595	0.669172	0.0474378
M215T92	215.033	1.5295	1.10926	0.460184	0.231927	0.162479	0.40611	0.286175	0.632406	0.165931	0.0994196	0.141246	0.168508	0.173067	0.10517	0.0112758
M249T308	248.96	5.1275	1.13589	0.485291	0.327299	0.735477	0.669563	1.16238	0.788356	0.62497	0.275856	0.333093	0.285509	0.31228	0.430418	0.0332947
M271T225	271.004	3.742	1.08137	1.60887	0.982612	1.16906	0.867296	1.05357	0.867605	0.000195597	0	0	0	0	0	2.29667e-06
M310T51	310.174	0.856	1.09203	0.0173795	0.0225782	0.0342323	0.0245416	0.0409441	0.0310382	0.744278	0.472798	0.567672	0.271458	0.388631	0.378477	7.05563e-05
M318T324	318.077	5.403	1.39849	3.56063	3.08143	3.34548	3.08489	2.74789	2.90889	0.00102482	0	0	0	0	0	1.5995e-10
M373T47	373.106	0.783	1.0731	0.0122106	0.0103902	0.0165425	0.0144584	0.0188539	0.0128022	0.728573	0.353078	0.57495	0.285899	0.350707	0.35567	0.000117994
M385T308	384.936	5.135	1.00367	0.28941	0.17351	0.265523	0.316037	0.539241	0.368588	0.363962	0.0142412	0.0124731	0.0134776	0.0135145	0.0109106	0.00809697
M388T44	388.156	0.74	1.03816	0.886756	1.01367	1.81679	1.15118	1.99974	1.49312	0.820705	0.727304	0.644089	0.644555	0.835759	0.729784	0.00548044
M415T46	415.115	0.773	1.58267	0.00188	0.00190041	0.00222274	0.00103134	0.00487803	0.00379148	1.33965	0.952358	0.724664	0.514107	0.415367	0.325728	0.00105355
M62T48	61.9891	0.794	1.93558	0.27554	0.212007	0.516745	0.244958	0.549795	0.295773	1.50767	0.939571	1.00904	0.631037	0.621039	0.529657	0.00849025
M748T686	747.565	11.427	1.00213	0.388797	0.446335	1.22519	0.569997	1.20048	0.607759	0.264964	0.265607	0.247525	0.263508	0.309116	0.29965	0.0127069
