# Supplementary material for: A multi-omics study of the anti-cancer effect of a ferulic acid derivative FA-30
Source: Royal Society of Chemistry journal article supplement (doi:10.1039/d2mo00025c), 2022-07-27
Supplement: d2mo00025c2.xlsx [file d2mo00025c2.xlsx]

## Sheet: Sheet1
name	M381T671	M446T671	M445T671	M491T551	M303T81	M331T614	M425T675	M495T728	M477T696	M183T365	M273T319	M431T728	M382T671	M395T614	M658T33	M745T1124	M184T365	M239T603	M174T59	M396T614	M475T736	M325T1131	M293T643	M307T397	M357T542	M320T79	M427T641	M139T365	M302T78	M281T554	M239T673	M345T554	M589T32	M546T787	M496T728	M284T1066	M209T356	M545T786	M279T964	M223T603	M346T554	M332T614	M284T39	M283T1066	M120T47	M97T39	M460T648	M281T59	M524T742
N-BLANK-01.mzdata	0.252974	0.0322258	0.315396	0.0353282	0.0192004	0.209395	0.00946391	0.333943	0.0233535	0.189139	0	0.233768	0.0225142	0.256709	0.0133624	0.0892543	0.0205399	0.0192278	0.0174571	0.0224679	0.0115474	0.0272854	0.0235097	0.0458648	0.0153998	0.216279	0.0214433	0.0189852	0.104646	0.222299	0.0110687	0.196484	0.166323	0.0307383	0.0367138	0.00346298	0.199254	0.239673	0.0106652	0.00874595	0.0161102	0.0141799	0.00840675	0.0153281	0.0232049	0.0401979	0.00900832	0.00615586	0.0227075
N-BLANK-02.mzdata	0.231847	0.0287811	0.291693	0.0316592	0.022048	0.187397	0.00833813	0.302549	0.0209746	0.177832	0	0.216423	0.0199245	0.233011	0.0113569	0.0831425	0.0170381	0.0202747	0.0219706	0.0200023	0.0116237	0.0266283	0.0252885	0.0312409	0.0139858	0.219875	0.0187267	0.0169412	0.120063	0.204458	0.00953228	0.176583	0.147425	0.0265609	0.0298727	0.0087054	0.178761	0.21013	0.0206589	0.00916293	0.014638	0.013444	0.00882456	0.0445335	0.0251855	0.0375682	0.00762582	0.00644714	0.0288004
N-BLANK-03.mzdata	0.333095	0.0417823	0.399897	0.0459165	0.0209544	0.269874	0.0126051	0.435613	0.0296115	0.222247	0	0.305563	0.0260412	0.313904	0.018137	0.133212	0.0244586	0.0205007	0.017975	0.0291985	0.0153574	0.0294875	0.0311024	0.0169383	0.0195779	0.280903	0.0295797	0.0235097	0.138391	0.274229	0.0136867	0.230254	0.209945	0.0377196	0.0465842	0.00414214	0.275828	0.291424	0.0117022	0.00848091	0.0179819	0.0201061	0.0103409	0.0237155	0.0340867	0.052349	0.0120188	0.0105692	0.0277213
N-BLANK-04.mzdata	0.295555	0.0355965	0.360689	0.040432	0.0216996	0.243995	0.00982315	0.392878	0.0250579	0.203581	0	0.285947	0.026778	0.297549	0.0141716	0.145605	0.0203954	0.014633	0.0197085	0.0256234	0.0148874	0.0367705	0.0307694	0.0536529	0.018019	0.240147	0.0228463	0.0198186	0.119253	0.245701	0.0111946	0.206957	0.189149	0.0333615	0.0403247	0.00661043	0.237083	0.274251	0.0103214	0.00554059	0.0156221	0.0188673	0.00915896	0.035117	0.0300094	0.0505141	0.0117403	0.00620254	0.0311697
N-BLANK-05.mzdata	0.309789	0.0366024	0.387361	0.04767	0.0240418	0.252443	0.0122052	0.424665	0.0288703	0.160485	0.000197481	0.298297	0.0261971	0.315339	0.0170023	0.157122	0.0158564	0.0241995	0.0198973	0.0268189	0.0169979	0.03271	0.031145	0.0258507	0.0188418	0.307144	0.0252249	0.0168391	0.161098	0.252526	0.01191	0.221702	0.207664	0.0355967	0.0432101	0.00413583	0.262187	0.283384	0.00930186	0.011282	0.0212063	0.0194803	0.00979341	0.0205011	0.0347632	0.0500618	0.0114086	0.00596777	0.0354098
N-BLANK-06.mzdata	0.268236	0.0321078	0.335428	0.0389662	0.0220552	0.211917	0.00978911	0.363348	0.0237323	0.166785	0	0.26711	0.0235857	0.274365	0.0157278	0.15132	0.0179993	0.0196097	0.0214491	0.0235629	0.0136779	0.0296611	0.0290897	0.0475579	0.0169269	0.275877	0.0236157	0.0174188	0.133896	0.216122	0.0133225	0.187739	0.181831	0.0282095	0.0406212	0.00491028	0.224919	0.240274	0.00974408	0.00767968	0.0149289	0.0163289	0.00808061	0.025393	0.0251227	0.0425632	0.010933	0.00550032	0.0445256
N-FA30-01.mzdata	0.228307	0.0296052	0.289984	0.0374007	0.00764491	0.19187	0.00920308	0.329794	0.0239814	0.16219	0	0.233417	0.0190582	0.23319	0.0162847	0.179156	0.0162231	0.0146217	0.00894525	0.021314	0.0138108	0.0480386	0.0250615	0.0203988	0.0170871	0.0134732	0.0202207	0.017077	0.00734116	0.181186	0.00987205	0.157663	0.206924	0.0289566	0.0352971	0.00619213	0.220449	0.22183	0.0194969	0.00608547	0.119903	0.0134863	0.000328674	0.0339299	0.0294537	0.0512866	0.00939047	0.000358563	0.0302415
N-FA30-02.mzdata	0.250009	0.0310674	0.324694	0.0418502	0.00311457	0.207645	0.00920935	0.377696	0.0232258	0.154824	0	0.271011	0.0213824	0.257999	0.0208231	0.214088	0.0167944	0.0125736	0.00574048	0.0222653	0.0129842	0.040963	0.0269504	0.0163762	0.0180087	0.00684296	0.0207144	0.018272	0.00202483	0.204437	0.0104874	0.187162	0.237994	0.0307829	0.0418896	0.00384997	0.240536	0.245865	0.0140084	0.00460337	0.0133279	0.0161265	0	0.0235497	0.0337928	0.0524787	0.00952248	0	0.0237765
N-FA30-04.mzdata	0.197957	0.0245548	0.247215	0.0305706	0.000320885	0.1782	0.00819806	0.282964	0.018867	0.166961	0	0.208888	0.0186927	0.203145	0.0159251	0.21267	0.017863	0.0110283	0.00201047	0.0210236	0.00986629	0.0318353	0.0238684	0.0114098	0.0136244	0.000530427	0.0163676	0.0208703	0.000296279	0.158932	0.00873486	0.138375	0.18836	0.0225599	0.0315959	0.00331101	0.19379	0.193032	0.0108735	0.00479452	0.082086	0.0125313	0	0.016295	0.0208239	0.0381297	0.00754371	0	0.0125203
N-FA30-05.mzdata	0.200811	0.0241023	0.243363	0.0301933	0.000143888	0.163986	0.00762	0.293786	0.0188885	0.116664	0	0.207283	0.0194187	0.200293	0.0145207	0.16608	0.0127541	0.0111884	0.0017464	0.0180066	0.0094097	0.0793618	0.0233691	0.0125097	0.0129952	0.000777996	0.0184125	0.0123561	0.000457016	0.154776	0.00912168	0.13985	0.183159	0.0239866	0.0305951	0.00246092	0.197023	0.205458	0.0107533	0.00478194	0.0113953	0.0140407	0	0.0132328	0.0235196	0.0396444	0.00799432	0	0.0111941
N-FA30-06.mzdata	0.199789	0.0246737	0.253747	0.0310838	0.000528783	0.159503	0.00690842	0.288488	0.0208672	0.169494	0	0.215339	0.0180932	0.196282	0.0143613	0.178415	0.0193713	0.013873	0.00207865	0.0177002	0.0107182	0.0790587	0.0236328	0.0188808	0.0134967	0.000835393	0.0159901	0.0157507	0.000150691	0.160033	0.00980645	0.137688	0.186184	0.0239857	0.0318853	0.00157453	0.187589	0.20104	0.00989993	0.00528072	0.0502696	0.0133128	0	0.0137827	0.0224426	0.0398854	0.00706384	0	0.013968
N-FA30-08.mzdata	0.206765	0.0253053	0.258008	0.0366297	0	0.171578	0.0080167	0.328342	0.0211185	0.125765	0.000159787	0.225819	0.0166183	0.197299	0.0162356	0.190253	0.0120359	0.00889622	0.00136678	0.0192871	0.0112555	0.0403043	0.0234681	0.00855383	0.0137008	0.000321884	0.0207184	0.0150239	0	0.174907	0.0106258	0.15765	0.212186	0.0264428	0.0332845	0.00309832	0.210004	0.211885	0.0125315	0.00403948	0.012474	0.0139484	0	0.0166398	0.0271852	0.0406982	0.00849637	0	0.0187461
[truncated: 346 more columns]

## Sheet: VIP-0
Var ID (Primary)	2.44693 * M1.VIP[1]cvSE
M352T617	2.34429
M265T821	2.30109
M147T1137	1.86316
M471T671	1.77889
M398T617	1.66142
M293T1099	1.60773
M113T33	1.56628
M473T671	1.52417
M242T534	1.38539
M495T728	1.20785
M249T33	1.20407
M310T540	1.18062
M388T792	1.16178
M415T617	1.13136
M346T554	1.12197
M93T38	1.11082
M445T671	1.08632
M353T617	1.05601
M431T728	1.05577
M317T33	1.04639
M155T52	0.99312
M269T38	0.990791
M95T38	0.972138
M381T671	0.96923
M62T1137	0.963879
M395T614	0.958078
M306T60	0.951888
M331T614	0.936915
M209T356	0.931797
M606T61	0.931005
M589T32	0.930983
M388T617	0.90565
M217T54	0.90019
M745T1124	0.881693
M183T365	0.867215
M133T52	0.862518
M521T33	0.841359
M472T671	0.837058
M545T786	0.830942
M266T822	0.826789
M281T554	0.814749
M62T617	0.811481
M385T33	0.794663
M399T617	0.772722
M488T671	0.726768
M345T554	0.704186
M320T79	0.697731
M181T33	0.693277
M231T487	0.690368
M250T854	0.677617
M500T743	0.669823
M481T786	0.66263
M474T671	0.659965
M151T38	0.658261
M463T671	0.637781
M461T671	0.636969
M945T1137	0.631028
M103T41	0.628478
M325T1131	0.622149
M657T32	0.621398
M271T38	0.618217
M453T33	0.595124
M490T671	0.595062
M475T671	0.592729
M215T41	0.58923
M209T394	0.5801
M956T40	0.578769
M128T65	0.568949
M132T39	0.568115
M186T350	0.56589
M187T421	0.565111
M153T38	0.565101
M695T1080	0.547558
M243T534	0.544237
M611T70	0.54169
M157T52	0.531633
M389T792	0.528001
M195T55	0.525917
M498T706	0.525689
M302T78	0.525073
M355T1001	0.521883
M311T540	0.520761
M146T39	0.520109
M861T32	0.518742
M390T617	0.517538
M124T51	0.514813
M383T1067	0.513186
M416T617	0.507223
M283T1066	0.503073
M255T1001	0.501356
M267T38	0.493797
M451T792	0.492227
M329T38	0.484783
M401T546	0.479039
M793T32	0.478975
M213T39	0.478669
M209T38	0.452053
M295T487	0.444317
M211T38	0.440534
M307T397	0.438673
M373T540	0.438031
M524T742	0.433373
M62T540	0.430665
M526T762	0.426725
M389T617	0.422314
M297T35	0.410352
M228T492	0.407046
M354T617	0.405658
M595T850	0.404951
M177T55	0.402656
M491T551	0.400881
M200T260	0.394667
M165T356	0.391441
M217T39	0.391118
M465T671	0.390059
M478T788	0.3865
M120T47	0.386061
M496T728	0.377509
M480T848	0.375436
M607T61	0.370796
M588T671	0.36223
M540T771	0.361188
M489T671	0.357207
M658T33	0.357147
M501T743	0.354147
M279T964	0.353742
M307T34	0.352892
M307T60	0.350871
M328T60	0.349379
M404T60	0.346782
M426T60	0.341928
M446T671	0.341307
M760T65	0.338323
M130T31	0.338027
M451T728	0.336074
M293T643	0.334675
M566T793	0.334001
M464T671	0.3308
M432T728	0.328988
M462T671	0.327512
M173T368	0.324162
M586T671	0.323256
M236T483	0.323099
M199T54	0.320852
M139T365	0.320574
M501T786	0.320491
M400T617	0.319205
M590T33	0.318832
M396T614	0.318703
M673T33	0.315798
M184T365	0.315111
M469T33	0.313989
M331T39	0.311131
M546T787	0.309147
M540T65	0.304409
M239T34	0.303353
M199T260	0.302698
M337T47	0.301312
M877T33	0.300208
M420T673	0.299347
M499T706	0.293726
M218T232	0.291825
M794T38	0.288342
M239T603	0.287963
M590T671	0.285658
M105T34	0.284862
M541T564	0.284571
M299T35	0.281596
M329T458	0.281425
M476T671	0.279983
M477T696	0.2788
M452T765	0.278788
M250T33	0.276608
M796T38	0.275919
M203T254	0.2745
M356T1001	0.27425
M214T447	0.272602
M427T641	0.272065
M588T747	0.269495
M612T70	0.268961
M332T614	0.268869
M726T32	0.267888
M511T34	0.266679
M239T774	0.263845
M382T671	0.262547
M219T36	0.258497
M198T293	0.258453
M401T33	0.256809
M525T742	0.254735
M491T671	0.254376
M377T584	0.253053
M145T38	0.252857
M422T68	0.251247
M343T823	0.250125
M251T854	0.249466
M303T81	0.247896
M62T671	0.247601
M327T519	0.247132
M174T59	0.24695
M381T1014	0.24644
M283T38	0.245611
M579T33	0.245497
M464T873	0.245166
M190T38	0.244883
M251T33	0.244241
M181T260	0.243752
M114T33	0.243236
M436T789	0.242686
M279T35	0.242465
M97T39	0.240583
M402T546	0.237971
M475T736	0.237833
M564T745	0.237048
M308T60	0.237029
M168T52	0.237028
M375T34	0.237017
M231T35	0.236034
M340T1001	0.235714
M188T421	0.235553
M593T936	0.234273
M397T668	0.231267
M357T542	0.230891
M827T32	0.229105
M285T38	0.229031
M391T617	0.226914
M273T38	0.224874
M284T1066	0.224811
M945T33	0.224644
M256T719	0.223699
M539T34	0.222537
M525T805	0.22053
M309T34	0.21859
M333T33	0.217558
M792T38	0.217296
M334T31	0.216715
M277T35	0.215339
M255T33	0.213674
M201T471	0.213447
M226T39	0.213021
M527T749	0.212998
M613T70	0.212564
M374T1001	0.212443
M115T41	0.211545
M479T788	0.210876
M204T39	0.210184
M568T854	0.208916
M460T648	0.207827
M510T691	0.207156
M318T66	0.206958
M492T551	0.206469
M353T413	0.205265
M417T617	0.205078
M633T70	0.204942
M476T740	0.203639
M312T540	0.202088
M171T34	0.201131
M810T37	0.200424
M790T38	0.199557
M482T787	0.199357
M736T38	0.199125
M801T33	0.199034
M281T1015	0.198832
M527T33	0.198312
M492T671	0.197738
M466T671	0.195965
M449T681	0.194761
M318T33	0.194457
M481T848	0.194444
M223T603	0.19349
M402T31	0.192701
M135T40	0.192132
M348T540	0.190653
M89T59	0.190384
M425T675	0.190218
M323T33	0.190092
M182T50	0.189909
M443T34	0.18886
M218T52	0.187331
M265T512	0.186604
M275T53	0.185904
M531T860	0.182671
M221T787	0.182621
M183T260	0.181284
M450T617	0.180927
M560T731	0.18081
M282T554	0.180314
M541T771	0.179578
M798T38	0.179384
M808T37	0.179249
M357T35	0.1791
M421T260	0.178909
M283T260	0.178845
M812T37	0.177723
M567T793	0.17692
M137T65	0.176906
M592T671	0.176464
M186T65	0.175054
M462T810	0.173221
M256T260	0.171407
M374T540	0.170909
M239T673	0.170444
M117T77	0.169025
M946T32	0.168635
M129T268	0.167481
M374T673	0.167378
M731T33	0.166257
M281T35	0.164799
M229T35	0.164244
M287T36	0.164081
M587T671	0.163449
M738T38	0.162999
M513T34	0.16272
M501T34	0.162029
M742T32	0.161618
M450T713	0.159732
M323T59	0.159134
M344T602	0.157023
M419T260	0.155829
M851T33	0.155756
M814T37	0.154713
M463T590	0.154475
M272T60	0.154029
M448T60	0.153828
M470T32	0.1528
M795T38	0.152154
M236T260	0.152002
M347T540	0.14668
M421T673	0.146479
M221T35	0.144321
M581T34	0.141868
M356T540	0.140495
M635T60	0.140156
M161T35	0.139222
M523T33	0.139189
M800T38	0.139051
M281T59	0.138287
M465T873	0.136983
M407T603	0.135602
M557T770	0.134261
M583T793	0.133769
M240T427	0.133632
M473T540	0.133498
M619T588	0.132906
M216T39	0.132852
M474T701	0.13256
M212T38	0.131408
M241T34	0.130264
M162T260	0.129654
M435T34	0.129347
M234T260	0.128281
M471T540	0.124037
M453T765	0.123763
M201T260	0.123215
M530T770	0.123109
M895T32	0.122846
M377T34	0.122005
M378T540	0.121816
M477T740	0.118268
M296T260	0.118207
M569T853	0.118146
M191T61	0.115963
M427T60	0.11541
M329T60	0.115047
M386T42	0.114746
M242T427	0.114123
M193T382	0.113927
M591T32	0.112113
M295T540	0.10825
M433T34	0.10418
M284T39	0.104001
M199T293	0.102461
M388T42	0.102149
M349T387	0.0984352
M375T540	0.0976484
M289T35	0.0973231
M367T35	0.0968597
M699T33	0.0964585
M446T42	0.0955757
M727T32	0.0936189
M253T610	0.0927681
M444T42	0.0900007
M431T633	0.0896513
M291T35	0.0843839
M330T60	0.0800741
M163T35	0.0791613
M793T33	0.0753561
M856T33	0.0751753
M502T42	0.0744356
M410T673	0.0731956
M241T427	0.071292
M173T34	0.0706264
M319T33	0.0665019
M143T60	0.0533958

## Sheet: VIP>1
Var ID (Primary)	2.44693 * M1.VIP[1]cvSE	N-BLANK-01.mzdata	N-BLANK-02.mzdata	N-BLANK-03.mzdata	N-BLANK-04.mzdata	N-BLANK-05.mzdata	N-BLANK-06.mzdata	N-FA30-01.mzdata	N-FA30-02.mzdata	N-FA30-03.mzdata	N-FA30-04.mzdata	N-FA30-05.mzdata	N-FA30-06.mzdata	P value
M113T33	1.56628	0.459122	0.406348	0.622182	0.536224	0.58939	0.514273	0.466843	0.564803	0.432178	0.426401	0.433081	0.478741	0.195521
M147T1137	1.86316	0	0.248029	0.343868	0.152984	0.20379	0.163821	0.340422	0.244794	0.442693	0.206455	0.247478	0.320562	0.0771834
M242T534	1.38539	0.106118	0.16521	0.0797663	0.163573	0.113054	0.0866746	0.173362	0.189898	0.124219	0.264678	0.135543	0.135108	0.0793311
M249T33	1.20407	0.271636	0.24443	0.372818	0.318431	0.36449	0.292802	0.283107	0.329248	0.258327	0.251612	0.249698	0.287775	0.189831
M265T821	2.30109	0.125201	0.210339	0.105323	0.163506	0.206856	0.195776	0.187423	0.186285	0.0881771	0.270839	0.188261	0.459613	0.281676
M293T1099	1.60773	0.0142733	0.0933923	0.0292185	0.0534425	0.123691	0.0942065	0.124318	0.10642	0.0551242	0.144805	0.0871543	0.306428	0.113966
M310T540	1.18062	0	0	0	0	0	0	1.39423	1.39917	0.996723	1.38901	0.544583	0.423272	0.00022631
M317T33	1.04639	0.234985	0.20835	0.307114	0.270915	0.294909	0.258958	0.24824	0.285341	0.224646	0.224868	0.223282	0.256768	0.327387
M346T554	1.12197	0.0161102	0.014638	0.0179819	0.0156221	0.0212063	0.0149289	0.119903	0.0133279	0.082086	0.0113953	0.0502696	0.012474	0.117978
M352T617	2.34429	0.000182987	0	0	0	0	0	2.1847	1.90334	1.61974	0.970155	0.543579	0.209539	0.0031861
M353T617	1.05601	0	0	0	0	0	0	0.455418	0.403126	0.341439	0.207614	0.117014	0.0449166	0.00294528
M388T792	1.16178	0.219206	0.214225	0.140709	0.212701	0.235214	0.259773	0.20143	0.175561	0.21508	0.203059	0.188185	0.170386	0.256378
M398T617	1.66142	0	0	0	0	0	0	1.12598	0.988481	0.868406	0.507042	0.28782	0.11375	0.00294174
M415T617	1.13136	0	0	0	0	0	0	0.764991	0.74837	0.600249	0.450422	0.288377	0.130227	0.000757535
M431T728	1.05577	0.233768	0.216423	0.305563	0.285947	0.298297	0.26711	0.233417	0.271011	0.208888	0.207283	0.215339	0.225819	0.042736
M445T671	1.08632	0.315396	0.291693	0.399897	0.360689	0.387361	0.335428	0.289984	0.324694	0.247215	0.243363	0.253747	0.258008	0.00427108
M471T671	1.77889	1.61052	1.02245	1.16454	1.04408	0.957919	1.06323	0.972805	1.19694	1.04336	1.00451	0.982596	0.881568	0.248586
M473T671	1.52417	1.11036	0.682358	0.777957	0.718374	0.63236	0.7168	0.650006	0.799748	0.699935	0.681963	0.665306	0.589847	0.252683
M495T728	1.20785	0.333943	0.302549	0.435613	0.392878	0.424665	0.363348	0.329794	0.377696	0.282964	0.293786	0.288488	0.328342	0.0465092
M93T38	1.11082	0.668007	0.626844	0.639458	0.666127	0.708479	0.714615	0.575156	0.798099	0.676632	0.645806	0.670704	0.647554	0.962446

## Sheet: VIP>1 p<0.05
Var ID (Primary)	mzmed	rtmed	2.44693 * M1.VIP[1]cvSE	N-BLANK-01.mzdata	N-BLANK-02.mzdata	N-BLANK-03.mzdata	N-BLANK-04.mzdata	N-BLANK-05.mzdata	N-BLANK-06.mzdata	N-FA30-01.mzdata	N-FA30-02.mzdata	N-FA30-03.mzdata	N-FA30-04.mzdata	N-FA30-05.mzdata	N-FA30-06.mzdata	P value
M310T540	310.109	9.004	1.18062	0	0	0	0	0	0	1.39423	1.39917	0.996723	1.38901	0.544583	0.423272	0.00022631
M415T617	415.115	10.289	1.13136	0	0	0	0	0	0	0.764991	0.74837	0.600249	0.450422	0.288377	0.130227	0.000757535
M398T617	398.125	10.289	1.66142	0	0	0	0	0	0	1.12598	0.988481	0.868406	0.507042	0.28782	0.11375	0.00294174
M353T617	353.123	10.289	1.05601	0	0	0	0	0	0	0.455418	0.403126	0.341439	0.207614	0.117014	0.0449166	0.00294528
M352T617	352.12	10.289	2.34429	0.000182987	0	0	0	0	0	2.1847	1.90334	1.61974	0.970155	0.543579	0.209539	0.0031861
M445T671	444.974	11.183	1.08632	0.315396	0.291693	0.399897	0.360689	0.387361	0.335428	0.289984	0.324694	0.247215	0.243363	0.253747	0.258008	0.00427108
M431T728	430.974	12.126	1.05577	0.233768	0.216423	0.305563	0.285947	0.298297	0.26711	0.233417	0.271011	0.208888	0.207283	0.215339	0.225819	0.042736
M495T728	494.97	12.126	1.20785	0.333943	0.302549	0.435613	0.392878	0.424665	0.363348	0.329794	0.377696	0.282964	0.293786	0.288488	0.328342	0.0465092
