# Supplementary material for: A multi-omics study of the anti-cancer effect of a ferulic acid derivative FA-30
Source: Royal Society of Chemistry journal article supplement (doi:10.1039/d2mo00025c), 2022-07-27
Supplement: d2mo00025c3.xlsx [file d2mo00025c3.xlsx]

## Sheet: Sheet1
name	M571T700	M282T703	M676T684	M705T677	M717T311	M465T250	M244T250	M550T699	M677T684	M618T292	M134T312	M408T469	M330T360	M504T396	M719T312	M732T648	M116T324	M822T291	M619T292	M134T324	M247T754	M162T205	M98T323	M135T324	M88T324	M218T77	M524T394	M290T252	M292T253	M644T291	M346T359	M691T316	M911T298	M568T698	M910T298	M131T324	M130T324	M365T351	M407T467	M862T292	M74T331	M427T786	M394T326	M243T322	M149T322	M861T292	M173T72	M148T322	M142T321
BLANK-01.mzdata	0	0.000165042	0.00286799	0.0317579	0.0174423	0.00275444	0.0271426	0	0.00220747	0.00702402	0	0.0459172	0.0109795	0.0132845	0.0322519	0.0224486	0.0421263	0.00211253	0.00166992	0.471226	0.00115054	0.0615291	0.00994004	0.0248881	0.0396689	0.027061	0.000660719	0.0214392	0.014207	0.000315278	0.00114598	0.00515231	0.0020135	0.00918597	0.00539807	0.0185002	0.267973	0	0.0202387	0.00243089	0.0333029	0.00344671	0.0101964	0.0170035	0.126546	0.00568429	0.0902839	2.31861	0.041287
BLANK-02.mzdata	0	0	0.0032813	0.0309797	0.0161641	0.00296777	0.0253846	0	0.00186178	0.00547609	0	0.0474246	0.0217829	0.0124208	0.0305567	0.0221009	0.0419233	0.00249425	0.00187083	0.4883	0.0031486	0.0529157	0.0128872	0.0261667	0.0375183	0.0207465	0.000848782	0.0197392	0.0128672	0.000910254	0.00268699	0.00192894	0.00167077	0.00789153	0.00427686	0.0177189	0.273443	0.00111034	0.0222084	0.00260979	0.0301219	0.00293017	0.011523	0.0174703	0.128804	0.00495933	0.0730966	2.34337	0.0643398
BLANK-03.mzdata	7.65499e-05	0.000313223	0.00449106	0.040832	0.0209507	0.00263168	0.0208722	0.000194841	0.00302355	0.00559059	0.00301569	0.0466385	0.0436358	0.00657136	0.0375267	0.0307588	0.0447174	0.00220415	0.00160459	0.553222	0.000648914	0.0450126	0.0192417	0.0268207	0.0375335	0.0218466	0.00177846	0.0115282	0.00689787	0.000878418	0.00780886	0.00445088	0.00156898	0.000288807	0.00441804	0.0168695	0.242949	0.000652718	0.0193355	0.00255368	0.0236286	0.0015199	0.00446888	0.0241397	0.119186	0.00547212	0.0664458	2.09617	0.10089
BLANK-04.mzdata	0	0.000248272	0.00384404	0.041253	0.0187205	0.00399743	0.0240502	0.000114407	0.00281718	0.00812159	0.00151846	0.0554158	0.0421756	0.00634479	0.0324489	0.0303869	0.0464104	0.00217491	0.00198599	0.565203	0.00334207	0.0623872	0.0195361	0.0272012	0.0421032	0.0233706	0.00166892	0.0156439	0.00948941	0.00112807	0.00416038	0.00401006	0.00225111	9.6915e-05	0.00519461	0.0185831	0.288387	8.79026e-05	0.0219073	0.00284362	0.0338094	0.00398579	0.00977897	0.0257113	0.13537	0.00661414	0.0808995	2.46272	0.0922486
BLANK-05.mzdata	0	0.00117089	0.00746268	0.0732903	0.0217695	0.00155467	0.0252002	0.000230429	0.00573489	0.00500094	0.00329348	0.0640454	0.0568588	0.00799162	0.0391143	0.0532485	0.0580062	0.00262709	0.00194704	0.643372	0.00138527	0.0655311	0.0213462	0.0339159	0.0465451	0.0162394	0.0024274	0.0110873	0.00677244	0.000744877	0.0127679	0.00579265	0.00221653	0.000673472	0.00627768	0.0179662	0.271702	0.000867768	0.0322695	0.00278668	0.0393307	0.00268767	0.00257003	0.0290888	0.130833	0.00562332	0.0552659	2.28451	0.163106
BLANK-06.mzdata	0	0.000602482	0.00757358	0.0762593	0.0181586	0.00366662	0.0268012	0.000332634	0.00661477	0.0079193	0	0.0468737	0.0321183	0.00744722	0.031677	0.0447441	0.0526897	0.00305142	0.00261981	0.636802	0.00130097	0.0614095	0.0184252	0.0301376	0.0450189	0.0226767	0.00237533	0.0176405	0.0103447	0.00131892	0.00442872	0.00334866	0.00281363	0.000595386	0.00604127	0.0185471	0.292053	0	0.0188455	0.00272022	0.0325516	0.00364359	0.00913166	0.0245738	0.138039	0.00690396	0.0837443	2.48281	0.0945111
FA30-01.mzdata	0.000739158	0.00248873	0.0142951	0.0652491	0.000840882	0.0021542	0.0212432	0.00013203	0.00774552	0.000736703	0	0	0	6.6078e-05	0.0020553	0.00406913	0.000200039	0.000381963	0	0.00564406	0	0.000149415	0.00370816	0	0.000109431	0.00654281	0.000112815	0.000383507	0.000267039	0.000274005	0	0.000265193	0.00100552	0.00178205	0.00187631	0	0.0074484	0	0	0.000324878	0	5.25308e-05	0	0	0.00250105	0.00076701	0.0446622	0.0350218	0.0281944
FA30-02.mzdata	0.00141548	0.00332672	0.0290072	0.124065	0.00124746	0.00658296	0.0234745	0.000305229	0.00873574	0.00134764	0.000204752	0.000167379	0	0.000884473	0.00519534	0.0174958	0.000222618	0.000517191	0.000562513	0.0221441	0	0.000637803	0.00283403	0.00016855	0.000529645	0.00747008	0.00100185	7.43096e-05	0	0.000759116	0	0.000828597	0.00106219	0.00389132	0.00203484	0	0.00636337	0	4.68321e-05	0.000441304	3.19184e-05	0	0	0	0.00308014	0.00112626	0.040743	0.0469322	0.000892642
FA30-03.mzdata	0.00137714	0.00261937	0.0334843	0.162117	0.000937106	0.00707397	0.0244192	0.000319403	0.0167019	0.00171129	0	0.000154283	0	0.00130492	0.00404701	0.0207152	0.000485997	0.000521661	0.000787913	0.0110287	0	0.00127542	0.00296311	6.1899e-05	0.00052406	0.00812641	0.00142327	0	4.15578e-05	0.000985683	0	0.00101276	0.00133291	0.0041529	0.00230476	0	0.00708271	0	6.9944e-05	0.000576399	0.000115406	0	0	0.000114493	0.00325284	0.00112076	0.0293933	0.0545992	0.0217409
FA30-04.mzdata	0.00167028	0.00295128	0.0354657	0.156815	0.00115535	0.0072948	0.0240514	0.000465619	0.0166063	0.00180068	0.000246369	0	0	0.00116989	0.00450686	0.0186507	0.000475066	0.000679408	0.000800258	0.0106613	0	0.000696882	0.00252048	0.000391039	0.000454222	0.00766506	0.00121061	0	0	0.000990383	0	0.000991828	0.00109288	0.00474811	0.00245946	3.92697e-05	0.00754727	0	0	0.000663723	3.92151e-05	0	0	3.9587e-05	0.00314489	0.00138717	0.0283946	0.0542019	0.0168391
FA30-05.mzdata	0.00164287	0.00329831	0.0369513	0.158038	0.00113524	0.00583256	0.0249203	0.000255667	0.00708883	0.00163644	4.23391e-05	0	0	0.00125789	0.00277523	0.0138489	0.000885549	0.000572855	0.000663844	0.0144598	0	0.000667324	0.00196077	0.000323953	0.000497934	0.00797864	0.00136705	0	5.28016e-05	0.000967955	0	0.0012072	0.00135027	0.00500107	0.00282157	3.68349e-05	0.00957917	0	0	0.000434351	0.00294313	0	0	0	0.00444555	0.00130211	0.0233255	0.068724	0.000944921
FA30-06.mzdata	0.00225625	0.00266154	0.0390855	0.174875	0.000969515	0.00744777	0.0267589	0.000527501	0.0175929	0.00208108	5.51187e-05	0	0	0.0019248	0.00469971	0.0203311	0.00110296	0.00074451	0.000835461	0.015734	0	0.000961844	0.00235243	0.000262114	0.000537816	0.0083635	0.00240212	0	4.95244e-05	0.00145584	0	0.000923598	0.00164709	0.00615993	0.0029956	0.000114293	0.0081791	0	0	0.000684615	0.00210325	0	0	4.17377e-05	0.00394738	0.00153046	0.0294973	0.0626299	0.0161555
[truncated: 859 more columns]

## Sheet: VIP-0
Var ID (Primary)	M1.VIP[1+1+0]	2.44693 * M1.VIP[1]cvSE
M338T48	2.02138	1.67824
M200T251	3.99109	1.48938
M130T368	2.69508	1.28429
M308T361	5.87529	1.15216
M408T49	0.946627	1.14727
M116T343	6.50433	1.13607
M358T113	0.355415	1.13182
M358T50	0.267377	1.11354
M173T338	0.654804	0.981848
M757T481	1.58257	0.92117
M147T368	5.15836	0.913584
M132T338	0.619601	0.898964
M282T48	0.987725	0.822105
M536T43	0.754889	0.820536
M339T48	0.978073	0.820196
M142T321	1.34742	0.793279
M202T251	2.24264	0.785291
M241T318	0.459513	0.782479
M183T318	0.721421	0.770942
M250T56	0.905692	0.76916
M330T115	0.327174	0.768113
M132T243	4.14517	0.742681
M154T250	2.06278	0.728993
M134T324	3.54927	0.726874
M761T478	6.14686	0.719774
M376T48	0.450923	0.716837
M330T50	0.276262	0.688445
M360T48	0.868555	0.662664
M705T677	1.31073	0.657819
M354T46	1.10785	0.653943
M145T6	0.286686	0.650692
M118T383	4.31081	0.625537
M226T48	0.450505	0.617682
M148T322	7.24463	0.616499
M130T116	0.324264	0.615455
M245T52	0.621037	0.608097
M320T326	2.31504	0.595195
M359T113	0.172815	0.575335
M610T43	0.916099	0.563968
M359T50	0.151334	0.548935
M130T50	0.289398	0.541794
M537T43	0.559077	0.537394
M256T46	0.699748	0.53454
M222T251	0.671936	0.533947
M228T48	0.59934	0.532694
M137T216	2.37156	0.517357
M398T47	1.74922	0.516789
M392T49	0.622348	0.507518
M284T45	0.930828	0.506254
M132T381	4.41163	0.497699
M374T49	0.246487	0.491876
M762T479	4.10347	0.486999
M133T373	1.88286	0.482189
M759T478	3.94203	0.479115
M495T48	0.287686	0.473235
M258T786	4.79111	0.471229
M380T113	0.219201	0.463108
M266T50	0.634106	0.46072
M787T470	4.49188	0.458523
M261T86	1.17455	0.457926
M305T89	0.694142	0.443748
M732T648	0.598592	0.441769
M551T94	0.564381	0.441056
M330T360	0.894978	0.437721
M611T43	0.691749	0.426412
M235T383	1.60822	0.424895
M495T90	0.266967	0.423495
M139T73	0.559613	0.421103
M201T251	1.25282	0.415518
M551T49	0.547708	0.40632
M156T251	1.12245	0.404255
M367T817	0.925642	0.401398
M532T50	0.421721	0.401212
M123T76	1.43433	0.400479
M733T486	4.17136	0.396773
M449T49	1.06479	0.396739
M144T372	1.39446	0.383436
M467T47	0.2941	0.382855
M467T48	0.311422	0.377913
M135T52	0.626327	0.375189
M244T49	0.419939	0.368556
M331T115	0.153577	0.36545
M390T49	0.344435	0.36419
M285T118	0.518977	0.362974
M612T43	0.590264	0.360531
M175T338	0.538293	0.359462
M274T121	0.453402	0.356113
M263T317	0.860834	0.355385
M352T116	0.206466	0.354445
M467T91	0.228874	0.347428
M331T50	0.136952	0.34335
M355T49	0.327596	0.342375
M336T48	0.528459	0.341714
M309T360	2.06589	0.338002
M200T91	0.330766	0.337608
M361T48	0.44488	0.334895
M760T478	2.62004	0.33431
M283T48	0.461043	0.333059
M413T44	0.966412	0.332739
M185T51	0.363179	0.329445
M431T308	0.221501	0.327379
M487T50	0.964454	0.325879
M368T108	0.250137	0.324056
M531T50	1.0332	0.32357
M451T49	0.874801	0.3204
M773T46	0.824524	0.31984
M352T49	0.176856	0.319672
M377T48_2	0.456599	0.318563
M546T701	0.231164	0.317619
M312T47	1.10502	0.317324
M560T48	1.00162	0.314685
M340T48	0.379141	0.314389
M659T324	0.380166	0.313614
M184T813	3.91261	0.311881
M460T358	0.565949	0.309984
M523T93	0.134232	0.307876
M661T702	0.187689	0.305821
M443T50	0.767027	0.30442
M154T316	0.248562	0.303299
M132T317	3.53418	0.302932
M224T250	0.392206	0.301012
M788T470	3.04544	0.300048
M346T359	0.360574	0.298534
M444T48	0.438801	0.297083
M763T481	2.64011	0.295784
M150T281	0.586169	0.293725
M217T76	1.91219	0.293563
M734T484	2.75258	0.292917
M475T348	0.223343	0.291274
M499T302	0.187868	0.289946
M785T471	2.77456	0.28697
M113T314	0.889321	0.286162
M70T343	1.71148	0.285613
M735T491	3.91075	0.284587
M477T48	0.676023	0.282073
M271T50	0.241751	0.281973
M429T49	0.687486	0.281503
M552T94	0.368127	0.281017
M280T48	0.391595	0.28023
M393T48	0.806948	0.279288
M552T49	0.349702	0.277037
M459T51	0.633906	0.276747
M218T310	0.590755	0.275923
M496T48	0.212741	0.275665
M375T49	0.130977	0.27457
M208T48	0.190789	0.274358
M406T49	0.283011	0.274123
M295T310	0.31827	0.272456
M676T684	0.74021	0.271824
M684T298	0.252664	0.270884
M230T50	0.321384	0.270711
M347T368	0.274489	0.270523
M523T48	0.110569	0.270439
M169T368	0.255394	0.270164
M377T48_1	0.394055	0.26945
M161T73	0.3306	0.268696
M489T50	0.365296	0.268339
M427T48	0.480431	0.265915
M275T67	0.613382	0.265137
M515T785	2.07026	0.265054
M139T153	0.605229	0.264612
M677T684	0.38986	0.26065
M230T117	0.276444	0.260571
M789T471	2.69117	0.260462
M676T48	0.36349	0.260306
M227T48	0.197914	0.260134
M108T61	0.437367	0.260033
M639T329	0.322376	0.25988
M301T163	0.0625861	0.259165
M685T44	0.894925	0.258807
M121T327	0.309155	0.258245
M809T455	2.62064	0.255227
M381T113	0.0908765	0.252797
M203T251	0.721639	0.25224
M293T405	0.143508	0.251956
M227T308	0.725902	0.25153
M371T50	0.291424	0.251243
M86T243	1.62947	0.249115
M760T43	0.0829494	0.248492
M354T48	0.323393	0.246558
M358T325	1.20932	0.245641
M588T48	0.420048	0.24521
M408T469	1.08227	0.243748
M747T481	1.97817	0.243691
M165T56	0.136207	0.243135
M362T358	0.552659	0.242999
M110T505	1.4182	0.240437
M306T49	0.54866	0.23969
M496T706	2.33434	0.239648
M310T48	0.351198	0.2394
M453T345	0.137548	0.238915
M333T80	0.234672	0.23862
M783T463	2.40025	0.237487
M117T342	1.56639	0.237472
M342T325	1.19336	0.237318
M613T43	0.380597	0.237083
M446T48	0.359108	0.236365
M543T703	0.255231	0.236186
M221T49	0.204136	0.235972
M231T64	0.266484	0.235118
M257T46	0.298642	0.234742
M562T48	0.42596	0.23421
M407T467	0.710167	0.23324
M334T48	0.804498	0.232779
M503T50	0.413953	0.232547
M310T361	1.37816	0.23191
M167T200	0.216759	0.231401
M279T71	0.20878	0.230545
M130T324	2.47217	0.22804
M243T312	0.468092	0.227896
M257T379	0.438669	0.226623
M391T44	0.689426	0.226103
M229T323	0.714473	0.226086
M660T324	0.224238	0.225835
M244T250	0.113852	0.225762
M567T307	0.295367	0.224895
M202T316	0.155139	0.222457
M116T324	1.04062	0.222177
M141T154	0.483372	0.221972
M141T317	0.366202	0.2218
M811T457	1.8401	0.221092
M158T329	0.231373	0.220978
M91T308	0.663135	0.218375
M522T702	2.44308	0.218238
M804T306	0.258193	0.216465
M372T79	1.03975	0.215725
M270T49	0.45715	0.214548
M620T51	0.325201	0.213514
M425T49	0.439508	0.211719
M721T490	1.61864	0.211622
M285T45	0.425682	0.21066
M445T50	0.448658	0.210272
M502T390	1.40592	0.210033
M159T308	0.536817	0.209917
M684T43	0.374653	0.209729
M319T70	0.524225	0.209527
M501T397	0.430484	0.209258
M246T52	0.216592	0.209201
M314T50	0.191877	0.208501
M166T262	0.884293	0.20843
M758T479	1.29551	0.207655
M663T43	1.21799	0.207391
M170T782	1.09177	0.205789
M321T326	0.867382	0.205777
M774T46	0.572769	0.204722
M561T48	0.646331	0.204264
M450T49	0.496936	0.204264
M98T323	0.571595	0.203895
M399T48	0.874923	0.203768
M807T306	0.236018	0.20355
M155T251	0.612637	0.203428
M681T298	0.145423	0.203354
M363T78	0.340259	0.202755
M238T316	0.241861	0.202371
M335T331	0.778899	0.201932
M401T49	0.509771	0.201706
M119T251	0.477043	0.201388
M575T50	0.716362	0.199868
M468T48	0.19968	0.1989
M781T463	2.13243	0.198693
M131T50	0.11574	0.197764
M528T393	0.48928	0.196335
M209T48	0.150207	0.195922
M807T459	2.08337	0.195454
M243T322	0.729457	0.194913
M790T472	1.64776	0.194865
M545T50	0.522597	0.194863
M736T491	2.4815	0.19474
M118T252	1.21832	0.194505
M363T309	0.361616	0.194415
M405T49	0.364594	0.194216
M133T243	1.09025	0.19415
M273T57	0.276142	0.193664
M162T462	0.333775	0.193354
M222T164	0.546865	0.191689
M449T50	0.363646	0.191672
M380T49	0.202986	0.191655
M415T50	0.5637	0.190013
M491T156	0.201771	0.189991
M193T61	0.284637	0.189989
M366T48	0.274044	0.189884
M196T335	0.344238	0.189442
M802T49	0.25802	0.186599
M335T48	0.237087	0.185764
M344T67	1.10081	0.185236
M363T61	0.130683	0.185234
M398T224	0.83401	0.184453
M148T225	3.41929	0.184189
M747T305	1.26398	0.183729
M764T481	1.53095	0.182669
M812T456	1.23543	0.182644
M465T250	0.235174	0.182613
M170T214	2.44081	0.182584
M162T315	1.46529	0.181716
M820T310	0.204743	0.181315
M173T72	0.969014	0.180898
M206T343	0.281577	0.180374
M719T312	0.824013	0.180242
M504T396	0.400104	0.180216
M362T48	0.231153	0.179268
M686T44	0.612998	0.179134
M786T471	1.87058	0.178123
M296T122	0.231216	0.177769
M371T344	0.321764	0.177542
M281T50	0.316712	0.177322
M281T111	0.383307	0.176701
M731T482	1.49198	0.176511
M198T48	0.170757	0.176467
M149T322	1.70627	0.17586
M286T118	0.246984	0.175805
M473T50	0.706878	0.175773
M544T700	0.832566	0.175529
M126T225	1.61833	0.175006
M500T397	0.964039	0.174398
M745T469	0.596206	0.174368
M223T250	0.235471	0.17321
M140T816	1.01071	0.172926
M767T453	0.790927	0.172382
M403T68	0.116128	0.17227
M289T52	0.445705	0.171136
M222T316	0.535654	0.170118
M337T48	0.306741	0.170073
M707T497	2.32732	0.17004
M135T324	0.80144	0.169172
M174T123	0.169132	0.168767
M179T362	0.982395	0.168741
M242T49	0.397043	0.168531
M685T298	0.164525	0.168431
M129T318	0.806619	0.168157
M238T251	0.222562	0.165903
M119T383	1.05269	0.164768
M171T52	0.262914	0.164471
M668T297	0.216246	0.163841
M722T482	1.03059	0.163833
M290T50	0.165113	0.163618
M505T48	0.0892896	0.163386
M447T311	0.177504	0.162716
M131T374	0.74068	0.161394
M509T48	0.104846	0.161032
M379T311	0.188374	0.160219
M545T701	0.417054	0.160175
M810T454	1.80124	0.159887
M488T50	0.535419	0.159376
M481T317	0.177564	0.158806
M197T154	0.398353	0.157512
M278T61	0.206967	0.157503
M198T335	0.214712	0.156992
M570T50	0.567559	0.156325
M482T50	0.554396	0.15548
M758T43	0.238594	0.155062
M229T48	0.311158	0.154982
M353T48	0.178616	0.154606
M138T216	0.687867	0.154484
M773T298	1.05043	0.154237
M131T116	0.0914049	0.154167
M97T162	0.506172	0.15309
M524T49	0.0631501	0.152851
M524T700	1.12278	0.152822
M520T47	0.273571	0.152044
M773T473	1.39816	0.151761
M553T94	0.136172	0.151445
M837T458	0.985466	0.151412
M775T474	1.31538	0.151394
M589T48	0.285427	0.150942
M479T403	0.366698	0.150604
M414T45	0.573699	0.15053
M720T309	0.568061	0.150167
M438T49	0.366543	0.149907
M526T50	0.572402	0.149852
M88T324	0.971614	0.14957
M191T326	0.614325	0.149519
M258T49	0.111626	0.149413
M755T479	1.2056	0.149025
M784T463	1.60635	0.148283
M547T51	0.439425	0.148166
M452T49_1	0.41033	0.147952
M782T463	1.46639	0.147819
M162T205	1.14919	0.147621
M759T43	0.208915	0.147607
M313T47	0.42866	0.147549
M381T45	0.32748	0.147351
M533T49	0.521189	0.146503
M357T50	0.214704	0.14609
M359T327	0.433989	0.144888
M436T48	0.184754	0.14375
M74T331	0.844371	0.143269
M614T43	0.258283	0.143211
M134T312	0.170529	0.143127
M808T459	1.46136	0.142854
M745T309	1.36378	0.141972
M138T357	0.203282	0.141919
M236T385	0.54929	0.141502
M130T68	0.628439	0.141143
M448T61	0.117982	0.140938
M87T312	0.195712	0.140391
M717T311	0.637458	0.140044
M748T480	1.32176	0.139837
M368T48	0.206578	0.139478
M286T49	0.138896	0.138273
M306T102	0.47303	0.138246
M304T50	0.185618	0.137693
M262T86	0.39843	0.137406
M399T334	0.427481	0.136413
M240T51	0.278433	0.136262
M344T81	0.853884	0.136237
M201T316	0.249007	0.135843
M553T49	0.0889539	0.13573
M463T49	0.445243	0.135449
M124T76	0.380746	0.135327
M666T298	0.128922	0.134983
M421T467	0.904999	0.134967
M441T49	0.56433	0.134631
M791T303	1.1288	0.13453
M136T50	0.19752	0.134261
M372T44	0.157499	0.133881
M507T48	0.46948	0.133793
M614T50	0.512921	0.133594
M478T49	0.424826	0.133547
M453T49	0.369269	0.133486
M320T50	0.399158	0.133258
M460T50	0.31906	0.133129
M719T465	0.65716	0.132263
M422T49	0.205269	0.132066
M264T318	0.268041	0.131993
M476T348	0.178941	0.13176
M204T249	0.142283	0.131304
M434T715	0.38597	0.131219
M533T61	0.140689	0.130886
M749T483	1.23356	0.129901
M568T698	0.189651	0.129298
M774T472	0.979495	0.129245
M480T395	1.76539	0.129172
M482T393	1.38343	0.128381
M141T251	0.355093	0.128347
M163T50	0.160685	0.127447
M765T43	0.568467	0.127192
M482T312	0.179485	0.126946
M385T50	0.360854	0.126935
M210T59	0.251068	0.126598
M370T46	0.63216	0.126065
M707T51	0.362778	0.126037
M501T49	0.493724	0.125994
M185T816	0.901764	0.125779
M309T50	0.25621	0.125705
M309T109	0.304665	0.125607
M538T49	0.611051	0.125261
M265T74	0.0682963	0.125037
M772T785	0.517906	0.124752
M394T48	0.428762	0.124704
M768T453	0.531334	0.124614
M428T48	0.240935	0.124007
M424T49	0.312641	0.123332
M677T51	0.35122	0.122837
M605T51	0.413826	0.122693
M322T326	0.600976	0.122449
M589T50	0.395031	0.122222
M444T50	0.406832	0.122059
M664T43	0.802147	0.122056
M120T330	2.38669	0.122034
M258T372	0.0914883	0.121629
M315T50	0.0931783	0.120738
M751T301	1.03914	0.120662
M669T297	0.140991	0.120118
M292T253	0.472539	0.120054
M240T316	0.154584	0.119976
M523T224	0.532768	0.119903
M407T49	0.235502	0.119567
M497T706	1.197	0.119182
M290T252	0.60251	0.118964
M835T455	1.30808	0.118724
M290T326	0.162819	0.118656
M708T497	1.49764	0.118544
M762T50	0.320903	0.118425
M327T49	0.160907	0.117694
M526T389	0.577831	0.117434
M379T49	0.302435	0.117403
M669T362	1.00077	0.117195
M691T316	0.258048	0.117154
M494T707	1.20635	0.117081
M493T50	0.375997	0.116502
M633T50	0.40125	0.116238
M369T45	1.10828	0.116194
M775T300	0.914816	0.115634
M516T785	0.878209	0.115479
M312T70	0.238631	0.115243
M437T49	0.168788	0.115043
M776T46	0.307151	0.114758
M157T251	0.348015	0.114696
M247T754	0.1883	0.114122
M395T311	0.155038	0.113684
M307T49	0.263086	0.113547
M433T446	0.619547	0.113373
M129T66	0.101601	0.113266
M356T49	0.0978258	0.112738
M262T315	0.146644	0.112551
M102T324	1.08337	0.112451
M430T49	0.366089	0.112356
M497T49	0.177682	0.111774
M576T50	0.449415	0.11167
M538T88	0.516702	0.111534
M767T306	1.45359	0.111354
M503T393	0.745259	0.111327
M737T488	1.25943	0.111285
M753T300	0.890296	0.111036
M233T333	0.243291	0.110781
M465T49	0.286385	0.110737
M84T323	0.837504	0.10999
M678T51	0.295203	0.109732
M259T312	0.370259	0.109641
M722T51	0.296845	0.109589
M208T321	0.0813679	0.109478
M259T785	1.41437	0.109393
M72T252	0.6674	0.109207
M776T475	0.879646	0.108921
M542T50	0.344866	0.108764
M240T251	0.146548	0.108711
M789T304	1.042	0.10837
M146T315	0.344839	0.108102
M439T49	0.197543	0.107579
M343T326	0.435524	0.106739
M569T202	0.178056	0.106576
M346T61	0.116324	0.106503
M520T704	1.13674	0.106445
M118T318	1.53626	0.106067
M394T326	0.424807	0.105749
M311T366	0.470764	0.105406
M659T51	0.41231	0.104977
M748T302	0.586295	0.104844
M525T178	0.177629	0.104719
M156T316	0.224788	0.104695
M463T311	0.218737	0.104425
M771T300	0.74327	0.104223
M420T461	0.620107	0.104223
M523T702	1.30739	0.104134
M387T49	0.446907	0.104018
M276T67	0.214824	0.10397
M218T77	0.568312	0.103538
M432T447	0.759111	0.103297
M225T250	0.129781	0.102954
M619T51	0.324478	0.102936
M761T46	0.130453	0.102417
M427T331	0.389818	0.102411
M382T48	0.259236	0.10233
M416T49	0.273264	0.102275
M373T79	0.51134	0.102159
M457T49	0.417595	0.101977
M647T50	0.319942	0.101928
M140T366	0.333821	0.101764
M498T50	0.351694	0.101068
M409T49	1.14992	0.100961
M476T406	0.417809	0.100955
M176T61	0.0856197	0.100365
M833T443	1.17303	0.100201
M483T49	0.300784	0.0996519
M496T49	0.22544	0.0995823
M272T50	0.139673	0.09957
M383T48	0.19043	0.0993101
M515T308	0.158912	0.0991285
M420T57	0.134082	0.0983858
M534T48	0.329047	0.0983254
M500T47	0.245813	0.0977985
M539T49	0.35594	0.0977364
M205T247	0.488178	0.097666
M249T49	0.13335	0.0976329
M691T51	0.298519	0.0969088
M422T461	0.602008	0.0967152
M717T51	0.236639	0.0966673
M618T61	0.196481	0.0963966
M259T67	0.277297	0.0959897
M361T333	0.398488	0.0958959
M815T465	0.973545	0.0956361
M491T252	0.278458	0.0955434
M801T301	0.4427	0.0951689
M336T337	0.232215	0.0950424
M813T465	1.04553	0.0949233
M311T52	0.230984	0.0945604
M360T325	0.43777	0.0945458
M216T738	1.18701	0.0942564
M113T162	1.15126	0.0942209
M504T50	0.242221	0.0936531
M214T50	0.195117	0.093628
M795T450	0.834623	0.0925866
M311T312	0.169099	0.0925386
M718T309	0.423376	0.0922548
M603T50	0.317265	0.0918838
M577T51	0.319512	0.0917865
M210T327	0.146183	0.091752
M397T45	0.22713	0.0910987
M188T247	0.334696	0.0909063
M233T364	0.649372	0.0901015
M404T49	0.231787	0.0900298
M421T47	0.195539	0.0899759
M474T50	0.364531	0.0898944
M145T374	0.417601	0.0896191
M480T49	0.27201	0.0895171
M479T49	0.225425	0.0894166
M174T67	0.433449	0.0890034
M190T61	0.209542	0.0889978
M405T328	0.369131	0.0887784
M285T785	0.544569	0.0881844
M836T456	0.923423	0.0881593
M400T48	0.364848	0.0872303
M429T66	0.106425	0.0870572
M166T317	1.08218	0.0866964
M426T49	0.260559	0.0864899
M586T51	0.317724	0.0864888
M705T483	0.956792	0.0863905
M615T50	0.324391	0.0861633
M673T50	0.306158	0.0861475
M178T333	0.264862	0.0861036
M701T44	0.196456	0.085946
M772T292	0.700886	0.0859046
M793T447	1.16182	0.0858195
M149T44	0.258008	0.0854537
M703T51	0.309547	0.0853448
M736T50	0.243793	0.085133
M519T708	0.35962	0.0847216
M708T51	0.268716	0.0846756
M556T50	0.380398	0.0845745
M769T305	1.34713	0.0845628
M670T298	0.0925398	0.0840024
M725T302	0.906425	0.0838721
M298T48	0.265236	0.0838578
M394T475	0.827693	0.0833597
M512T50	0.376832	0.0833067
M162T366	0.47174	0.0831976
M518T707	0.688252	0.0829511
M277T785	0.465	0.0827004
M542T703	0.658862	0.0824361
M349T323	1.02719	0.0824134
M466T375	0.906924	0.082302
M281T702	0.615788	0.0820959
M838T456	0.701187	0.0820694
M170T316	0.875746	0.0820001
M177T785	0.848127	0.0818886
M791T456	0.89712	0.0818827
M797T459	0.723936	0.0818267
M261T61	0.0987265	0.0816013
M454T50	0.293146	0.0815829
M452T407	0.536433	0.0810096
M590T50	0.320184	0.0806709
M766T43	0.416743	0.0806392
M755T303	0.341526	0.0804316
M528T50	0.261248	0.0800513
M239T310	0.166849	0.0800461
M750T476	0.769591	0.0799928
M570T699	0.254633	0.0797672
M792T303	0.762231	0.0796179
M521T47	0.213803	0.0793575
M341T49	0.248345	0.0791823
M554T49	0.208659	0.0790077
M525T701	0.576458	0.0789879
M671T47	0.296929	0.0788876
M123T311	0.446717	0.0782063
M873T61	0.192787	0.0782058
M450T50	0.265584	0.0780801
M776T300	0.598007	0.0777852
M703T61	0.212648	0.0772956
M133T55	0.345905	0.0771274
M625T51	0.212097	0.0771014
M780T50	0.202222	0.0765123
M308T44	0.204206	0.0762456
M420T224	0.777046	0.0762431
M616T51	0.223983	0.0761396
M741T309	0.821482	0.0758054
M751T43	0.329026	0.0757135
M675T51	0.214126	0.0752605
M260T315	0.264934	0.0749705
M687T44	0.308966	0.0749488
M223T44	0.102343	0.0746332
M779T465	0.720095	0.0745601
M805T460	0.917619	0.0744421
M438T382	0.89339	0.0740405
M134T243	0.324591	0.0738823
M525T49	0.18212	0.0736813
M765T457	0.747685	0.0734482
M790T304	0.716463	0.0732395
M717T468	0.62204	0.0729191
M468T50	0.319548	0.0725072
M439T384	0.430642	0.0724105
M723T51	0.296889	0.0724029
M302T329	0.256845	0.0722707
M644T291	0.000559518	0.0721751
M76T331	0.376012	0.0721331
M801T469	0.676263	0.0721167
M365T351	0.081296	0.0719466
M795T292	0.402119	0.0719051
M743T308	0.856992	0.0718877
M251T337	0.0926427	0.0717285
M465T380	0.355262	0.0716389
M816T466	0.670941	0.0715278
M933T298	0.170998	0.0714181
M571T50	0.332787	0.0712636
M527T50	0.335031	0.0712235
M182T282	0.26233	0.0711398
M799T300	0.454992	0.07111
M186T50	0.220484	0.0710618
M665T43	0.401967	0.0708363
M715T314	0.314245	0.0704004
M634T50	0.344151	0.0702886
M419T454	0.638232	0.0699137
M746T308	0.920893	0.0698178
M152T317	0.255664	0.0697706
M402T49	0.249922	0.0692308
M267T708	0.349119	0.0691101
M454T404	0.795395	0.0690569
M115T162	0.819657	0.0687726
M814T464	0.754694	0.0687242
M834T447	0.84012	0.0684234
M481T160	0.0395817	0.0682647
M211T738	0.543284	0.0682235
M203T316	0.139176	0.0681491
M363T49	0.189206	0.067987
M516T61	0.148883	0.0677523
M794T447	0.795427	0.0673599
M540T49	0.334048	0.0672469
M571T700	0.177981	0.0670658
M604T50	0.200517	0.0670249
M395T48	0.215261	0.0669722
M793T292	0.606069	0.0665119
M440T50	0.22272	0.0663981
M467T377	0.453477	0.0663758
M498T706	0.505217	0.0663583
M396T49	0.176972	0.0663231
M502T50	0.311681	0.0660919
M572T50	0.256348	0.0660789
M618T292	0.33814	0.0660758
M548T51	0.252773	0.0660449
M600T51	0.34905	0.0659992
M134T81	0.248414	0.0657851
M280T785	0.4752	0.0656358
M709T488	0.755107	0.0655203
M763T305	0.600304	0.0653524
M629T50	0.37837	0.0652525
M557T50	0.226197	0.0651453
M584T50	0.327242	0.0649006
M224T314	0.330105	0.0648032
M325T68	0.217519	0.0644629
M350T49	0.172344	0.0641482
M598T50	0.254602	0.0640678
M601T61	0.145413	0.0634811
M812T304	0.263741	0.0634329
M452T49_2	0.187174	0.0633325
M932T298	0.196195	0.0632211
M442T49	0.289617	0.0632004
M829T451	0.631253	0.0631189
M293T336	0.280037	0.0629207
M910T298	0.250641	0.0628906
M679T51	0.302402	0.062878
M289T162	0.332084	0.0627398
M646T50	0.201391	0.0626632
M806T458	0.654574	0.0625162
M419T49	0.251005	0.062503
M464T379	0.746744	0.0623794
M158T366	0.459667	0.0620309
M155T316	0.105803	0.0618275
M268T706	0.610555	0.0618065
M131T324	0.64291	0.0615399
M204T316	0.12727	0.0614463
M165T317	0.415357	0.0611719
M780T466	0.490733	0.0611147
M395T327	0.141695	0.0610267
M150T318	1.00974	0.0610216
M431T61	0.143426	0.0610121
M660T50	0.271632	0.0609984
M704T50	0.200695	0.0609882
M90T318	0.371373	0.060633
M410T49	0.564455	0.0605452
M407T85	0.206661	0.0605034
M601T50	0.250545	0.0602495
M296T699	0.529005	0.0602189
M752T43	0.238078	0.0601405
M244T315	0.388941	0.0599572
M472T48	0.271905	0.0595952
M546T50	0.302794	0.0594676
M187T59	0.340605	0.0592336
M157T785	0.781314	0.0591908
M513T50	0.222354	0.059167
M234T242	0.198353	0.0588216
M471T49	0.265618	0.0587893
M506T48	0.0517792	0.0586657
M334T49	0.356513	0.058417
M484T50	0.282445	0.0581974
M351T49	0.207624	0.0579762
M483T396	0.694578	0.0577712
M86T317	1.20909	0.0576901
M768T305	0.975059	0.0576641
M911T298	0.129644	0.0572695
M125T785	0.347058	0.0572494
M260T785	0.598162	0.0571037
M788T61	0.19645	0.057083
M521T704	0.61181	0.0570277
M693T506	0.863313	0.0567502
M386T50	0.20603	0.0565909
M388T49	0.225449	0.0561316
M177T47	0.147136	0.0560822
M180T417	0.2744	0.0557764
M237T349	0.225502	0.0557414
M567T48	0.0282294	0.0556295
M689T51	0.232807	0.0555908
M464T48	0.241057	0.0553248
M619T292	0.170231	0.0552836
M633T46	0.369306	0.0550606
M119T316	0.331237	0.0543689
M633T162	0.0747603	0.054234
M295T50	0.251409	0.0541713
M796T449	0.580593	0.0541538
M643T50	0.265767	0.0539578
M176T243	0.434633	0.053906
M792T450	0.648232	0.053798
M157T316	0.046374	0.0534043
M752T301	0.717288	0.0529667
M273T163	0.19595	0.0527978
M276T315	0.325121	0.0527829
M787T304	0.611266	0.0526772
M481T398	0.892284	0.0526055
M644T50	0.303562	0.052296
M766T456	0.54124	0.0522892
M750T301	0.492716	0.0521979
M517T785	0.418819	0.0518304
M631T48	0.432088	0.0517709
M182T317	0.977889	0.051408
M186T323	0.385943	0.0508091
M495T707	0.632368	0.0504863
M160T180	0.542415	0.050395
M469T49	0.300089	0.0501213
M744T309	0.571262	0.0498936
M820T290	0.236623	0.0497426
M803T465	0.628201	0.0492022
M632T47	0.303036	0.0488038
M133T317	0.865929	0.0487963
M72T318	0.829401	0.0480759
M550T699	0.0509251	0.0478442
M723T303	0.733102	0.047452
M405T161	0.268228	0.0474256
M822T291	0.204819	0.0473949
M175T52	0.282755	0.0473788
M779T301	0.464758	0.0470721
M524T394	0.0741675	0.0468068
M129T785	0.330534	0.0466464
M777T46	0.172751	0.0462757
M543T50	0.227465	0.0458294
M282T703	0.233207	0.045769
M169T785	0.403581	0.0454423
M670T363	0.543424	0.0453124
M163T316	0.42352	0.0453035
M478T402	0.835023	0.0443343
M418T453	0.517462	0.0433574
M770T304	0.895555	0.0431693
M754T300	0.593673	0.0427579
M136T317	0.420671	0.0427497
M508T705	0.556354	0.0424672
M778T300	0.368817	0.0423982
M765T306	0.858691	0.0421163
M724T303	0.501216	0.0417541
M427T786	0.263926	0.0416037
M205T316	0.46225	0.0413085
M798T453	0.510829	0.0411593
M793T304	0.609231	0.0410607
M811T303	0.396108	0.0409688
M499T50	0.250722	0.0409125
M486T47	0.171749	0.0408255
M149T785	0.638714	0.0406851
M436T713	0.354942	0.0403557
M649T50	0.275533	0.0401971
M276T699	0.476238	0.0392407
M754T728	0.454878	0.0391033
M661T51	0.185321	0.0389063
M739T306	0.598708	0.0387872
M703T307	0.557435	0.0381807
M458T49	0.276757	0.0380077
M798T290	0.261516	0.0376622
M167T317	0.408899	0.0376619
M468T711	0.470526	0.0373206
M749T300	0.748018	0.036703
M188T316	0.317093	0.0364624
M753T728	0.425404	0.0360203
M861T292	0.328491	0.0355641
M578T291	0.391944	0.0353589
M630T50	0.253311	0.0348947
M579T292	0.253817	0.0347553
M788T304	0.424541	0.0343547
M151T318	0.27512	0.034291
M701T305	0.360578	0.0342479
M465T309	0.273039	0.0336862
M804T455	0.462805	0.0336232
M796T291	0.254093	0.0334893
M814T302	0.346289	0.0332085
M112T785	0.309714	0.0329047
M312T785	0.279724	0.0321628
M729T305	0.470427	0.0319659
M726T301	0.620352	0.0312721
M300T49	0.423736	0.030717
M777T300	0.557534	0.030544
M410T786	0.422598	0.0300102
M815T302	0.458345	0.0282954
M743T459	0.514257	0.0279951
M742T308	0.565238	0.0269195
M510T704	0.482209	0.0253205
M813T303	0.509473	0.0251695
M117T161	0.287964	0.0249691
M698T732	0.372903	0.0246364
M862T292	0.221525	0.0225144
M727T305	0.463584	0.0215175

## Sheet: VIP>1
Var ID (Primary)	2.44693 * M1.VIP[1]cvSE	BLANK-01.mzdata	BLANK-02.mzdata	BLANK-03.mzdata	BLANK-04.mzdata	BLANK-05.mzdata	BLANK-06.mzdata	FA30-01.mzdata	FA30-02.mzdata	FA30-03.mzdata	FA30-04.mzdata	FA30-05.mzdata	FA30-06.mzdata	P value
M116T343	1.13607	2.54579	2.0573	1.27157	2.29489	1.03653	2.04843	0.0367666	0.0482614	0.0502131	0.0479899	0.0499922	0.0381135	1.91673e-05
M130T368	1.28429	0.580697	0.0441666	0.280875	0.507301	0.270487	0.460112	0.000887121	0.00125987	0.011266	0.0127382	0.00213864	0.00158266	0.00138896
M200T251	1.48938	1.96185	1.82394	1.13674	1.62095	1.09094	1.67639	0.390371	0.922892	1.01785	1.0446	0.715159	0.900297	0.00232787
M308T361	1.15216	2.06194	1.82293	1.04107	1.51464	1.03163	1.67239	0	7.04248e-05	0	5.55268e-05	3.99124e-05	0	4.49969e-06
M338T48	1.67824	0.0753428	0.389146	0.452914	0.698703	0.730303	0.144893	0.113612	0.177971	0.173303	0.298313	0.282728	0.186755	0.0976596
M358T113	1.13182	0.0372398	0.0951516	0.269648	0.387128	0.0194493	0.0282202	0.0227437	0.0174574	0.159077	0.23114	0.186996	0.0363423	0.686817
M358T50	1.11354	0.0410033	0.0825789	0.248547	0.354194	0.0192591	0.0302347	0.0217768	0.0154673	0.173429	0.222431	0.185727	0.0344921	0.772356
M408T49	1.14727	0.0280702	0.146336	0.0650283	0.274524	0.126046	0.0380784	0.0294392	0.0510901	0.0489968	0.0494356	0.0634634	0.0327377	0.107572

## Sheet: VIP>1 p<0.05
Var ID (Primary)	mzmed	rtmed	2.44693 * M1.VIP[1]cvSE	BLANK-01.mzdata	BLANK-02.mzdata	BLANK-03.mzdata	BLANK-04.mzdata	BLANK-05.mzdata	BLANK-06.mzdata	FA30-01.mzdata	FA30-02.mzdata	FA30-03.mzdata	FA30-04.mzdata	FA30-05.mzdata	FA30-06.mzdata	P value
M116T343	116.071	5.714	1.13607	2.54579	2.0573	1.27157	2.29489	1.03653	2.04843	0.0367666	0.0482614	0.0502131	0.0479899	0.0499922	0.0381135	1.91673e-05
M130T368	130.05	6.1415	1.28429	0.580697	0.0441666	0.280875	0.507301	0.270487	0.460112	0.000887121	0.00125987	0.011266	0.0127382	0.00213864	0.00158266	0.00138896
M200T251	200.048	4.187	1.48938	1.96185	1.82394	1.13674	1.62095	1.09094	1.67639	0.390371	0.922892	1.01785	1.0446	0.715159	0.900297	0.00232787
M308T361	308.093	6.0095	1.15216	2.06194	1.82293	1.04107	1.51464	1.03163	1.67239	0	7.04248e-05	0	5.55268e-05	3.99124e-05	0	4.49969e-06
