# Supplementary material for: A multi-omics study of the anti-cancer effect of a ferulic acid derivative FA-30
Source: Royal Society of Chemistry journal article supplement (doi:10.1039/d2mo00025c), 2022-07-27
Supplement: d2mo00025c4.xlsx [file d2mo00025c4.xlsx]

## Sheet: Sheet1
name	M257T594	M158T594	M217T237	M159T594	M195T237	M353T397	M335T334	M315T594	M160T594	M316T594	M149T839	M203T38	M279T838	M192T575	M309T400	M207T365	M150T464	M174T307	M456T944	M552T1035	M551T1036	M607T38	M235T791	M185T365	M426T749	M400T734	M301T839	M780T38	M280T838	M605T38	M167T365	M134T38	M665T38	M148T38	M180T594	M271T610	M206T772	M130T292	M197T38	M625T807	M200T292	M168T365	M209T35	M344T77	M354T617	M737T33	M199T38	M526T742	M356T811
BLANK-01.mzdata	0.00342908	0.172676	0.00117021	0.0181211	0.00104647	0.00565727	0.00152083	0.00678516	0.00105309	0.00147016	0.00328332	0.00116021	0.00608326	0.00276448	0.00382879	0.000816551	0.00141186	0.00120882	0.00152927	0.00203729	0.00523533	0.00149897	0.000828328	0.00111309	0.00028997	0.000230455	0.00379713	0.0014688	0.00124524	0.00105153	0.00677211	0.0014256	0.00079225	0.00466942	0.00424406	0.00156373	0.00112789	0.0249886	0.0037919	0	0.177738	0.000844386	0.000884621	0.00270991	0	0.000358204	0.00371251	0.000777773	3.96196e-05
BLANK-02.mzdata	0.00335698	0.17479	0.00121361	0.0179274	0.000901323	0.00336093	0.000856024	0.00693484	0.00106882	0.00149481	0.00307551	0.000703746	0.00625672	0.00289799	0.00249395	0.000804856	0.0013331	0.00113046	0.00118464	0.00293852	0.00698901	0.00130227	0.000802196	0.000913997	0.000211049	0.000234867	0.00400183	0.00117543	0.00119105	0.000926918	0.00579546	0.00158184	0.000736793	0.00421769	0.00458755	0.00156941	0.00102705	0.0238193	0.00333458	0	0.181378	0.000615141	0.000843524	0.00280778	0	0.000316661	0.0037159	0.000887868	0
BLANK-03.mzdata	0.00381031	0.191665	0.0012195	0.0203922	0.00102407	0.00218363	0.000463167	0.00774688	0.00124389	0.00157567	0.00343633	0.000480443	0.00669682	0.00312203	0.00161444	0.00100746	0.00136191	0.00077452	0.0012205	0.0021672	0.00564072	0.000859755	0.000749785	0.00145591	0.000255233	0.000354629	0.00410865	0.000816978	0.00110279	0.000557703	0.00819048	0.00165741	0.000448785	0.00510815	0.00426594	0.00166618	0.00101398	0.0249268	0.0028109	0	0.179318	0.000728219	0.000661636	0.0029943	0	0.000291057	0.00280071	0.0012134	0
BLANK-04-01.mzdata	0.0054065	0.291189	0.0014562	0.0282878	0.00130765	0.00514724	0.00151294	0.0116751	0.00193211	0.00252666	0.00423299	0.00141796	0.00933943	0.00473553	0.00469077	0.000759647	0.00154106	0.00134913	0.000412511	0.000681695	0.00191896	0.00106292	0.00138341	0.00121227	0.000186784	0.000142415	0.00782686	0.00100814	0.00166484	0.000752933	0.00713429	0.00201944	0.000589744	0.00540862	0.00744938	0.00271693	0.00170609	0.0309171	0.00341388	0	0.157808	0.000680064	0.000890929	0.00223783	0	0.00045916	0.00369294	0.00362094	4.04896e-05
BLANK-05.mzdata	0.00423543	0.190451	0.00104823	0.0189152	0.000719597	0.00314921	0.00080098	0.0072875	0.00118263	0.00170528	0.0032348	0.00077079	0.00601938	0.00308794	0.00238431	0.000766984	0.00131389	0.0010828	0.00107764	0.0021439	0.00529051	0.00140217	0.000764671	0.000929334	0.000223683	0.000258598	0.00382313	0.00111659	0.000981263	0.000959884	0.00606293	0.00178081	0.000782483	0.00440234	0.00480005	0.0014565	0.00087608	0.0254627	0.00372647	0	0.179378	0.000649196	0.000961265	0.00325615	0	0.000348554	0.0032352	0.00159119	0
BLANK-06.mzdata	0.00396911	0.197781	0.00100147	0.020024	0.000789457	0.00591514	0.00145406	0.00756475	0.00152471	0.00173452	0.00314385	0.00171281	0.0059939	0.00304085	0.00407116	0.00076348	0.0013148	0.000977087	0.00119826	0.00176484	0.00477563	0.00146738	0.00071845	0.00102907	9.02553e-05	0.000223179	0.0039074	0.00143796	0.00103129	0.00108804	0.00567057	0.00164684	0.000753485	0.004159	0.00464147	0.00158157	0.00101426	0.0249838	0.00391711	1.95424e-05	0.180369	0.00064257	0.00106603	0.00325617	0	0.00036925	0.00407567	0.00231737	0
FA30-01.mzdata	0.00535	0.262002	0.00184053	0.0261784	0.00111792	0.00239231	0.000551412	0.0109571	0.00179086	0.00243489	0.00531622	0.000984138	0.00989689	0.00396452	0.0015206	0.000447137	0.00162522	0.00363365	0.00112541	0.0356602	0.0864145	0.00302951	0.00119699	0.000843841	0.000347086	0.00147156	0.00675182	0.00277366	0.00173712	0.00186526	0.00565781	6.862e-05	0.00165666	0.00062587	0.00565875	0.00231669	0.00157019	0.0451932	0.00522649	0	0.181729	0.000602216	0.00159494	0.000315049	0.28091	0.000434825	0.00500947	0.00179798	0
FA30-02.mzdata	0.00650154	0.303456	0.00138154	0.0297129	0.00108104	0.00191171	0.000496813	0.0123811	0.00223832	0.00285026	0.00594106	0.000985344	0.0110244	0.00489432	0.00122649	0.00060371	0.00197137	0.00397551	0.00144364	0.008147	0.0212473	0.00213931	0.00133632	0.000846789	7.84949e-05	0.000790877	0.00816544	0.00191477	0.00199567	0.0015569	0.00514543	3.94268e-05	0.00134036	0.000493334	0.00650978	0.00254333	0.00185422	0.0498829	0.00462821	0	0.193513	0.000772538	0.00134707	5.05732e-05	0.253792	0.000611065	0.00631422	0.00160222	3.50986e-05
FA30-03.mzdata	0.0110378	0.526284	0.00131203	0.0527233	0.00122765	0.00231247	0.000531882	0.0225593	0.00339633	0.00467884	0.0101661	0.00204579	0.0194973	0.0080054	0.00151676	0.00076548	0.00365287	0.00379887	0.00260259	0.0068137	0.016583	0.00408876	0.00211	0.00139552	4.20907e-05	0.000387447	0.0131193	0.00333094	0.00407141	0.00281356	0.00746771	0	0.00221226	0.000269081	0.0117341	0.00441436	0.00295055	0.0830136	0.0101755	0	0.146298	0.000965882	0.00208189	0	0.19094	0.00132133	0.00981991	0.000449066	0
FA30-04.mzdata	0.00572318	0.265821	0.00104869	0.0268188	0.00080467	0.00164265	0.000426889	0.0111693	0.00184435	0.00229523	0.00472843	0.00150211	0.00855451	0.00407826	0.00106552	0.000756105	0.00162359	0.00199529	0.00143567	0.00421313	0.0116575	0.00218793	0.000984582	0.00108442	3.5942e-05	0.000464411	0.00623346	0.00175652	0.0017828	0.00147001	0.00721109	0	0.00128848	0.000131378	0.00569538	0.00223441	0.00157663	0.0404078	0.00515781	0	0.162383	0.000665099	0.00123087	0	0.234367	0.000773433	0.00614784	0.000634394	0
FA30-05.mzdata	0.0108887	0.526699	0.00116249	0.0524568	0.0012269	0.00142085	0.000293084	0.0222295	0.00379962	0.00469829	0.00976177	0.00627507	0.0168953	0.00817579	0.000977966	0.000524442	0.00359937	0.00283624	0.00227094	0.0100028	0.0258787	0.001602	0.00206556	0.000686554	0	0.000207613	0.0133705	0.00116592	0.00345153	0.00113937	0.00497263	6.03647e-05	0.000789763	4.10873e-05	0.0121553	0.00406604	0.00314984	0.0615354	0.00612264	0	0.173652	0.000735418	0.00203095	0	0.137208	0.00132511	0.0067862	0.000666521	6.33413e-05
FA30-08.mzdata	0.0149259	0.724832	0.00137566	0.072896	0.00148391	0.000843584	5.74762e-05	0.0310707	0.00548713	0.00655955	0.0130428	0.00150974	0.0248663	0.012144	0.000876299	0.000238895	0.00463472	0.00366703	0.00274097	0.00989487	0.0274417	0.000810728	0.00269018	0.000719565	0	8.13512e-05	0.0210006	0.000595336	0.00480208	0.000604212	0.00536294	0.000223193	0.000419564	0.000575867	0.0168025	0.00548616	0.00442646	0.0864421	0.00811321	0	0.193914	0.000493656	0.00193721	0	0.0242467	0.00198839	0.00602901	0.00130471	0
[truncated: 391 more columns]

## Sheet: VIP-0
Var ID (Primary)	M1.VIP[1+1+0]	2.44693 * M1.VIP[1]cvSE
M158T594	7.32054	4.87122
M282T952	2.83624	3.83621
M354T617	6.49321	3.74224
M360T1088	1.46625	3.23542
M338T1088	1.74431	2.81868
M165T70	1.1598	2.53802
M284T1013	1.58395	2.4772
M227T33	3.67407	2.38006
M358T760	1.27283	2.31062
M551T1036	2.05314	2.29201
M338T1124	1.24318	2.28737
M310T1025	1.09144	2.12887
M256T930	2.4392	2.09041
M408T1001	0.896821	1.94577
M312T540	4.25254	1.92003
M522T793	0.992726	1.90918
M81T42	1.09147	1.89798
M496T770	0.907417	1.87175
M282T1003	1.24584	1.86476
M226T990	0.75568	1.80462
M330T703	1.00971	1.80251
M355T617	2.98328	1.69033
M228T590	0.783322	1.67803
M480T788	1.0994	1.66327
M283T952	1.32339	1.63256
M159T594	2.30186	1.59047
M361T1088	0.710523	1.58249
M552T1035	1.28406	1.52301
M228T1001	0.636354	1.46801
M482T847	1.08763	1.37932
M707T617	1.79132	1.37751
M339T1088	0.822275	1.33642
M363T33	1.89232	1.32414
M154T260	0.687525	1.32132
M502T743	0.805939	1.3143
M200T292	0.174058	1.29832
M132T80	4.20325	1.28353
M336T1040	0.602805	1.25752
M284T1100	0.458986	1.25033
M729T617	1.72343	1.25004
M566T1137	1.18063	1.24797
M244T1002	0.525349	1.2464
M376T617	2.0675	1.20161
M159T33	1.83411	1.1949
M244T534	0.640372	1.18474
M143T41	1.71048	1.18002
M352T919	0.522467	1.16396
M91T33	1.70636	1.14823
M130T292	2.86633	1.13764
M376T673	0.609322	1.13238
M132T114	1.95417	1.11989
M202T292	1.13331	1.11562
M336T894	0.559772	1.09873
M308T61	4.78174	1.09022
M839T33	1.36036	1.06063
M359T760	0.599672	1.05451
M285T1013	0.748883	1.04041
M523T794	0.554728	1.02594
M315T594	1.54963	1.0112
M199T253	1.37746	1.00727
M497T770	0.469672	1.00393
M495T1002	1.61518	0.983403
M202T260	0.553025	0.972723
M523T1013	1.45582	0.972459
M301T839	1.24722	0.95965
M393T673	0.318346	0.944659
M147T38	0.450016	0.94414
M121T40	0.870881	0.913195
M311T1025	0.482132	0.9111
M709T1134	1.32995	0.899917
M280T895	1.36478	0.894296
M413T1084	0.435876	0.889242
M279T838	1.40035	0.874938
M354T970	0.414874	0.873859
M466T873	0.714781	0.866584
M588T1137	0.60865	0.852421
M226T534	0.530833	0.851787
M313T540	1.89341	0.849174
M256T1038	0.613166	0.848373
M257T930	1.0413	0.842951
M180T594	1.05788	0.83585
M481T788	0.580849	0.828899
M431T990	0.54491	0.825699
M567T1137	0.773006	0.817936
M156T260	0.582058	0.812602
M331T703	0.449474	0.804299
M208T990	0.337482	0.803334
M449T671	0.798293	0.779297
M283T1003	0.623903	0.774335
M142T29	0.751304	0.763612
M454T765	0.511597	0.76307
M383T1089	0.348533	0.757325
M217T40	0.967231	0.7554
M166T161	2.01656	0.752728
M907T33	1.1138	0.752652
M163T414	0.473023	0.74783
M227T990	0.254638	0.743555
M500T705	0.770092	0.741112
M421T673	0.361349	0.740681
M315T891	0.0966843	0.73851
M524T854	0.12734	0.735358
M257T1038	0.17768	0.717573
M192T575	0.911181	0.712181
M478T740	0.483348	0.703097
M611T1137	0.63981	0.699562
M230T580	0.236644	0.697808
M127T40	0.671377	0.687847
M503T743	0.450555	0.685744
M398T673	0.376736	0.684094
M314T767	0.367013	0.683732
M483T847	0.59766	0.679154
M429T671	0.381698	0.668989
M960T45	0.346689	0.664158
M223T907	0.821443	0.650545
M356T617	1.16464	0.643049
M337T894	0.327977	0.63561
M334T540	1.57034	0.625813
M467T976	1.05563	0.622204
M399T617	1.44531	0.620115
M257T594	1.07679	0.616117
M464T810	0.491852	0.615442
M185T414	0.423616	0.614327
M144T41	0.464749	0.613175
M663T1135	0.759604	0.590539
M392T617	1.21265	0.589516
M307T69	1.04202	0.589127
M258T39	1.58157	0.588924
M526T742	0.285566	0.588336
M427T671	0.435698	0.585616
M391T1084	0.311134	0.582605
M167T365	0.233333	0.579471
M496T1002	0.988034	0.575342
M209T990	0.177967	0.573887
M451T671	0.661895	0.573682
M524T1012	0.945693	0.572084
M438T789	0.53521	0.569964
M528T761	0.292559	0.564665
M298T272	1.06686	0.563468
M377T617	0.971225	0.560822
M149T356	0.738959	0.559438
M589T1137	0.429492	0.556538
M285T1100	0.21837	0.552764
M246T292	1.84458	0.551842
M353T919	0.272091	0.547508
M149T839	1.05275	0.546211
M201T260	0.494514	0.54594
M211T356	0.579149	0.541742
M320T66	0.959202	0.540357
M162T39	1.81888	0.53803
M203T38	0.37541	0.537102
M229T1002	0.220987	0.536692
M243T33	0.842179	0.536359
M374T919	0.256165	0.526352
M274T577	0.429517	0.525036
M377T673	0.309878	0.516895
M255T381	0.614832	0.516373
M118T40	0.885351	0.515218
M397T920	0.354309	0.513848
M193T381	0.649917	0.51186
M198T990	0.191941	0.509914
M242T717	0.26913	0.502298
M270T778	0.211397	0.50052
M387T633	0.33786	0.499383
M286T708	0.347611	0.498926
M306T678	0.233889	0.494521
M373T617	0.743097	0.494398
M86T81	1.64678	0.492043
M197T38	0.824077	0.490587
M326T984	0.396311	0.478718
M245T1002	0.175921	0.475001
M417T945	0.538557	0.473057
M304T952	0.23104	0.472914
M146T40	0.194633	0.471022
M465T670	0.485514	0.469445
M119T260	0.403743	0.469374
M184T39	1.85949	0.465501
M139T38	0.926859	0.462713
M160T594	0.628546	0.462264
M414T1084	0.201148	0.459701
M186T433	0.598353	0.454199
M337T594	0.48193	0.450888
M353T397	0.656071	0.446382
M316T594	0.7064	0.441293
M191T990	0.122826	0.438931
M330T60	1.87909	0.438297
M200T739	0.386481	0.437794
M432T990	0.296193	0.437459
M439T948	0.660209	0.435516
M199T38	0.827481	0.431786
M271T610	0.636299	0.42972
M469T551	0.371763	0.42186
M437T774	0.490044	0.419858
M266T534	0.187642	0.419771
M309T400	0.610652	0.418482
M384T1088	0.162753	0.417509
M206T772	0.576882	0.411916
M218T99	1.79399	0.411698
M436T1084	0.644558	0.411431
M331T458	0.713489	0.41044
M223T603	0.232961	0.409818
M254T671	0.246487	0.409116
M422T673	0.127287	0.407902
M150T59	0.459815	0.407331
M228T33	0.663022	0.401831
M245T534	0.245536	0.400359
M309T60	1.70768	0.396661
M203T260	0.446818	0.396531
M468T976	0.632335	0.395528
M345T823	0.151307	0.395465
M447T33	0.542196	0.393869
M409T633	0.219651	0.391137
M219T35	0.541403	0.389427
M118T260	0.399593	0.388831
M281T895	0.654206	0.388705
M501T706	0.441469	0.388152
M182T70	1.02993	0.38307
M141T38	0.837606	0.381816
M607T38	0.430368	0.380113
M388T327	0.19487	0.377284
M425T633	0.216938	0.375994
M217T617	0.777643	0.375876
M322T77	1.26569	0.372384
M280T838	0.645893	0.371752
M132T40	1.67172	0.368704
M428T671	0.223347	0.36685
M120T161	1.18823	0.366513
M150T464	0.591117	0.36337
M432T633	0.378778	0.363104
M117T891	0.047632	0.361135
M353T34	0.549184	0.358912
M429T1035	0.632995	0.357069
M613T69	0.694713	0.354334
M430T671	0.197143	0.351135
M476T353	0.11211	0.350211
M277T381	0.483424	0.34688
M360T760	0.215886	0.345663
M379T33	0.482468	0.343977
M340T1088	0.290616	0.343527
M116T41	0.99481	0.341868
M314T540	0.721492	0.341028
M412T945	0.389204	0.337612
M431T671	0.191859	0.337467
M133T80	1.112	0.336974
M394T673	0.135933	0.335528
M400T734	0.261796	0.331721
M629T975	0.229442	0.331057
M249T609	0.479883	0.330618
M404T633	0.0997104	0.329464
M393T327	0.171114	0.328345
M350T540	1.18605	0.325881
M461T944	0.4729	0.325447
M300T665	0.918687	0.325037
M125T671	0.189816	0.321671
M155T260	0.578922	0.318486
M780T38	0.358645	0.318063
M185T365	0.12476	0.317041
M316T891	0.0527929	0.314579
M440T945	0.413307	0.314397
M463T673	0.211762	0.314068
M605T38	0.346207	0.312141
M231T581	0.0452406	0.309101
M459T774	0.316062	0.307652
M371T1012	0.116623	0.307139
M205T254	0.971962	0.306943
M280T36	1.26265	0.305279
M687T1014	0.118057	0.304985
M335T540	0.713069	0.303314
M520T364	0.104061	0.30107
M357T540	1.04919	0.298299
M673T972	0.139485	0.297619
M450T671	0.354956	0.288324
M177T540	0.575822	0.286936
M310T60	1.15503	0.286255
M235T791	0.44428	0.285695
M242T427	0.468314	0.285649
M432T341	0.154524	0.284897
M195T237	0.193817	0.283
M148T38	1.00651	0.28271
M258T930	0.33477	0.282154
M241T431	0.0241248	0.281737
M346T602	0.627137	0.280349
M392T1084	0.18944	0.27549
M302T642	0.11385	0.270327
M665T38	0.330847	0.269348
M149T407	0.109737	0.269179
M388T633	0.118554	0.268779
M444T671	0.300493	0.263939
M737T33	0.40293	0.261859
M107T414	0.185018	0.261298
M135T47	0.025072	0.260859
M327T311	0.205045	0.259856
M787T33	0.388499	0.258939
M230T492	0.255251	0.257422
M456T944	0.425115	0.256664
M204T260	0.162366	0.2552
M440T948	0.367001	0.25479
M206T37	0.793676	0.253688
M415T341	0.121655	0.252807
M222T260	0.258932	0.248629
M399T673	0.298038	0.248518
M343T599	0.0873161	0.247584
M157T260	0.174362	0.245756
M335T334	0.352118	0.245196
M637T974	0.0568691	0.244221
M538T804	0.084872	0.243569
M371T327	0.149146	0.24281
M717T970	0.315298	0.241738
M139T64	0.885188	0.241675
M97T37	0.659183	0.240047
M239T1000	0.220913	0.239648
M318T582	0.304207	0.238229
M349T311	0.195696	0.237363
M319T296	0.149532	0.236708
M275T577	0.218576	0.236501
M761T34	0.483717	0.236332
M500T943	0.326525	0.234654
M188T350	0.271405	0.234237
M773T673	0.13955	0.234193
M229T33	0.425517	0.232606
M136T70	0.224854	0.229202
M518T1096	0.404349	0.228282
M130T65	0.452457	0.227797
M217T237	0.119727	0.227315
M477T673	0.390723	0.226109
M305T293	0.195981	0.225301
M196T540	0.521964	0.225128
M301T367	0.344758	0.22417
M813T33	0.229337	0.223168
M167T161	0.712409	0.222875
M239T270	0.341354	0.22236
M413T35	0.246212	0.221141
M216T502	0.275485	0.220454
M212T492	0.218364	0.219753
M401T960	0.5953	0.219691
M170T350	0.354582	0.219586
M530T905	0.0612489	0.216259
M204T42	0.504516	0.215236
M175T38	0.0815331	0.214663
M333T65	1.02675	0.214388
M290T585	0.469958	0.214189
M141T260	0.205338	0.213213
M188T254	0.704942	0.211466
M216T447	0.173265	0.210681
M265T38	0.362535	0.210402
M285T482	1.11431	0.205469
M147T671	0.122721	0.20518
M286T366	0.163301	0.203929
M497T673	0.317235	0.202728
M410T917	0.389689	0.199406
M174T307	0.706462	0.197489
M287T671	0.141907	0.195008
M445T671	0.118899	0.194481
M137T38	0.679727	0.193592
M299T260	0.399847	0.191541
M179T60	0.862447	0.190142
M283T293	0.27853	0.189248
M163T39	0.516965	0.187401
M446T671	0.218388	0.17948
M160T41	0.534539	0.176359
M227T534	0.27718	0.176254
M247T292	0.695711	0.175523
M664T64	0.994129	0.174734
M164T414	0.112671	0.173429
M334T584	0.315721	0.171157
M374T42	0.71394	0.169853
M301T665	0.449582	0.169673
M344T312	0.196617	0.169601
M107T33	0.271655	0.16742
M344T77	0.795842	0.167311
M165T260	0.111025	0.165664
M183T70	0.347958	0.161856
M117T260	0.212391	0.161275
M300T293	0.171841	0.161073
M346T60	0.735862	0.159035
M243T416	0.437896	0.158566
M331T60	0.680026	0.153329
M401T35	0.354983	0.150443
M207T365	0.207115	0.15036
M161T446	0.261603	0.15024
M168T365	0.0298356	0.148212
M286T481	0.513434	0.147849
M192T38	0.545278	0.147844
M129T64	0.695072	0.144979
M298T626	0.409458	0.144963
M233T60	0.573946	0.143027
M183T260	0.0590158	0.142572
M170T38	0.685607	0.139122
M352T43	0.710257	0.138838
M233T35	0.392259	0.138736
M137T260	0.155081	0.136075
M358T315	0.133031	0.135145
M261T270	0.225356	0.135117
M143T260	0.172404	0.133776
M162T60	0.430279	0.131803
M405T811	0.0836839	0.130426
M220T233	1.10998	0.129781
M195T702	0.127681	0.128549
M134T38	0.619059	0.128131
M482T702	0.0774779	0.120383
M209T35	0.434299	0.120344
M415T690	0.0590525	0.117759
M113T36	0.514628	0.115098
M163T567	0.123807	0.112187
M188T36	0.204747	0.108166
M448T671	0.0794881	0.104316
M447T671	0.0932104	0.103773
M682T974	0.0970384	0.100072
M426T749	0.141567	0.0996798
M406T811	0.0455099	0.0936599
M343T35	0.369729	0.0930802
M449T811	0.0591638	0.0922461
M576T808	0.0551121	0.0883689
M203T815	0.209388	0.0857353
M185T38	0.467318	0.0830951
M620T807	0.0396693	0.0822071
M171T421	0.323505	0.0806233
M164T567	0.0743119	0.0762001
M400T811	0.0342037	0.0713464
M532T810	0.0268014	0.0709065
M427T811	0.00674022	0.0693401
M577T808	0.0397068	0.0641144
M493T811	0.0267769	0.062619
M664T805	0.00934361	0.0553995
M356T811	0.00934015	0.0271655
M476T348	0.178941	0.13176
M204T249	0.142283	0.131304
M434T715	0.38597	0.131219
M533T61	0.140689	0.130886
M749T483	1.23356	0.129901
M568T698	0.189651	0.129298
M774T472	0.979495	0.129245
M480T395	1.76539	0.129172
M482T393	1.38343	0.128381
M141T251	0.355093	0.128347
M163T50	0.160685	0.127447
M765T43	0.568467	0.127192
M482T312	0.179485	0.126946
M385T50	0.360854	0.126935
M210T59	0.251068	0.126598
M370T46	0.63216	0.126065
M707T51	0.362778	0.126037
M501T49	0.493724	0.125994
M185T816	0.901764	0.125779
M309T50	0.25621	0.125705
M309T109	0.304665	0.125607
M538T49	0.611051	0.125261
M265T74	0.0682963	0.125037
M772T785	0.517906	0.124752
M394T48	0.428762	0.124704
M768T453	0.531334	0.124614
M428T48	0.240935	0.124007
M424T49	0.312641	0.123332
M677T51	0.35122	0.122837
M605T51	0.413826	0.122693
M322T326	0.600976	0.122449
M589T50	0.395031	0.122222
M444T50	0.406832	0.122059
M664T43	0.802147	0.122056
M120T330	2.38669	0.122034
M258T372	0.0914883	0.121629
M315T50	0.0931783	0.120738
M751T301	1.03914	0.120662
M669T297	0.140991	0.120118
M292T253	0.472539	0.120054
M240T316	0.154584	0.119976
M523T224	0.532768	0.119903
M407T49	0.235502	0.119567
M497T706	1.197	0.119182
M290T252	0.60251	0.118964
M835T455	1.30808	0.118724
M290T326	0.162819	0.118656
M708T497	1.49764	0.118544
M762T50	0.320903	0.118425
M327T49	0.160907	0.117694
M526T389	0.577831	0.117434
M379T49	0.302435	0.117403
M669T362	1.00077	0.117195
M691T316	0.258048	0.117154
M494T707	1.20635	0.117081
M493T50	0.375997	0.116502
M633T50	0.40125	0.116238
M369T45	1.10828	0.116194
M775T300	0.914816	0.115634
M516T785	0.878209	0.115479
M312T70	0.238631	0.115243
M437T49	0.168788	0.115043
M776T46	0.307151	0.114758
M157T251	0.348015	0.114696
M247T754	0.1883	0.114122
M395T311	0.155038	0.113684
M307T49	0.263086	0.113547
M433T446	0.619547	0.113373
M129T66	0.101601	0.113266
M356T49	0.0978258	0.112738
M262T315	0.146644	0.112551
M102T324	1.08337	0.112451
M430T49	0.366089	0.112356
M497T49	0.177682	0.111774
M576T50	0.449415	0.11167
M538T88	0.516702	0.111534
M767T306	1.45359	0.111354
M503T393	0.745259	0.111327
M737T488	1.25943	0.111285
M753T300	0.890296	0.111036
M233T333	0.243291	0.110781
M465T49	0.286385	0.110737
M84T323	0.837504	0.10999
M678T51	0.295203	0.109732
M259T312	0.370259	0.109641
M722T51	0.296845	0.109589
M208T321	0.0813679	0.109478
M259T785	1.41437	0.109393
M72T252	0.6674	0.109207
M776T475	0.879646	0.108921
M542T50	0.344866	0.108764
M240T251	0.146548	0.108711
M789T304	1.042	0.10837
M146T315	0.344839	0.108102
M439T49	0.197543	0.107579
M343T326	0.435524	0.106739
M569T202	0.178056	0.106576
M346T61	0.116324	0.106503
M520T704	1.13674	0.106445
M118T318	1.53626	0.106067
M394T326	0.424807	0.105749
M311T366	0.470764	0.105406
M659T51	0.41231	0.104977
M748T302	0.586295	0.104844
M525T178	0.177629	0.104719
M156T316	0.224788	0.104695
M463T311	0.218737	0.104425
M771T300	0.74327	0.104223
M420T461	0.620107	0.104223
M523T702	1.30739	0.104134
M387T49	0.446907	0.104018
M276T67	0.214824	0.10397
M218T77	0.568312	0.103538
M432T447	0.759111	0.103297
M225T250	0.129781	0.102954
M619T51	0.324478	0.102936
M761T46	0.130453	0.102417
M427T331	0.389818	0.102411
M382T48	0.259236	0.10233
M416T49	0.273264	0.102275
M373T79	0.51134	0.102159
M457T49	0.417595	0.101977
M647T50	0.319942	0.101928
M140T366	0.333821	0.101764
M498T50	0.351694	0.101068
M409T49	1.14992	0.100961
M476T406	0.417809	0.100955
M176T61	0.0856197	0.100365
M833T443	1.17303	0.100201
M483T49	0.300784	0.0996519
M496T49	0.22544	0.0995823
M272T50	0.139673	0.09957
M383T48	0.19043	0.0993101
M515T308	0.158912	0.0991285
M420T57	0.134082	0.0983858
M534T48	0.329047	0.0983254
M500T47	0.245813	0.0977985
M539T49	0.35594	0.0977364
M205T247	0.488178	0.097666
M249T49	0.13335	0.0976329
M691T51	0.298519	0.0969088
M422T461	0.602008	0.0967152
M717T51	0.236639	0.0966673
M618T61	0.196481	0.0963966
M259T67	0.277297	0.0959897
M361T333	0.398488	0.0958959
M815T465	0.973545	0.0956361
M491T252	0.278458	0.0955434
M801T301	0.4427	0.0951689
M336T337	0.232215	0.0950424
M813T465	1.04553	0.0949233
M311T52	0.230984	0.0945604
M360T325	0.43777	0.0945458
M216T738	1.18701	0.0942564
M113T162	1.15126	0.0942209
M504T50	0.242221	0.0936531
M214T50	0.195117	0.093628
M795T450	0.834623	0.0925866
M311T312	0.169099	0.0925386
M718T309	0.423376	0.0922548
M603T50	0.317265	0.0918838
M577T51	0.319512	0.0917865
M210T327	0.146183	0.091752
M397T45	0.22713	0.0910987
M188T247	0.334696	0.0909063
M233T364	0.649372	0.0901015
M404T49	0.231787	0.0900298
M421T47	0.195539	0.0899759
M474T50	0.364531	0.0898944
M145T374	0.417601	0.0896191
M480T49	0.27201	0.0895171
M479T49	0.225425	0.0894166
M174T67	0.433449	0.0890034
M190T61	0.209542	0.0889978
M405T328	0.369131	0.0887784
M285T785	0.544569	0.0881844
M836T456	0.923423	0.0881593
M400T48	0.364848	0.0872303
M429T66	0.106425	0.0870572
M166T317	1.08218	0.0866964
M426T49	0.260559	0.0864899
M586T51	0.317724	0.0864888
M705T483	0.956792	0.0863905
M615T50	0.324391	0.0861633
M673T50	0.306158	0.0861475
M178T333	0.264862	0.0861036
M701T44	0.196456	0.085946
M772T292	0.700886	0.0859046
M793T447	1.16182	0.0858195
M149T44	0.258008	0.0854537
M703T51	0.309547	0.0853448
M736T50	0.243793	0.085133
M519T708	0.35962	0.0847216
M708T51	0.268716	0.0846756
M556T50	0.380398	0.0845745
M769T305	1.34713	0.0845628
M670T298	0.0925398	0.0840024
M725T302	0.906425	0.0838721
M298T48	0.265236	0.0838578
M394T475	0.827693	0.0833597
M512T50	0.376832	0.0833067
M162T366	0.47174	0.0831976
M518T707	0.688252	0.0829511
M277T785	0.465	0.0827004
M542T703	0.658862	0.0824361
M349T323	1.02719	0.0824134
M466T375	0.906924	0.082302
M281T702	0.615788	0.0820959
M838T456	0.701187	0.0820694
M170T316	0.875746	0.0820001
M177T785	0.848127	0.0818886
M791T456	0.89712	0.0818827
M797T459	0.723936	0.0818267
M261T61	0.0987265	0.0816013
M454T50	0.293146	0.0815829
M452T407	0.536433	0.0810096
M590T50	0.320184	0.0806709
M766T43	0.416743	0.0806392
M755T303	0.341526	0.0804316
M528T50	0.261248	0.0800513
M239T310	0.166849	0.0800461
M750T476	0.769591	0.0799928
M570T699	0.254633	0.0797672
M792T303	0.762231	0.0796179
M521T47	0.213803	0.0793575
M341T49	0.248345	0.0791823
M554T49	0.208659	0.0790077
M525T701	0.576458	0.0789879
M671T47	0.296929	0.0788876
M123T311	0.446717	0.0782063
M873T61	0.192787	0.0782058
M450T50	0.265584	0.0780801
M776T300	0.598007	0.0777852
M703T61	0.212648	0.0772956
M133T55	0.345905	0.0771274
M625T51	0.212097	0.0771014
M780T50	0.202222	0.0765123
M308T44	0.204206	0.0762456
M420T224	0.777046	0.0762431
M616T51	0.223983	0.0761396
M741T309	0.821482	0.0758054
M751T43	0.329026	0.0757135
M675T51	0.214126	0.0752605
M260T315	0.264934	0.0749705
M687T44	0.308966	0.0749488
M223T44	0.102343	0.0746332
M779T465	0.720095	0.0745601
M805T460	0.917619	0.0744421
M438T382	0.89339	0.0740405
M134T243	0.324591	0.0738823
M525T49	0.18212	0.0736813
M765T457	0.747685	0.0734482
M790T304	0.716463	0.0732395
M717T468	0.62204	0.0729191
M468T50	0.319548	0.0725072
M439T384	0.430642	0.0724105
M723T51	0.296889	0.0724029
M302T329	0.256845	0.0722707
M644T291	0.000559518	0.0721751
M76T331	0.376012	0.0721331
M801T469	0.676263	0.0721167
M365T351	0.081296	0.0719466
M795T292	0.402119	0.0719051
M743T308	0.856992	0.0718877
M251T337	0.0926427	0.0717285
M465T380	0.355262	0.0716389
M816T466	0.670941	0.0715278
M933T298	0.170998	0.0714181
M571T50	0.332787	0.0712636
M527T50	0.335031	0.0712235
M182T282	0.26233	0.0711398
M799T300	0.454992	0.07111
M186T50	0.220484	0.0710618
M665T43	0.401967	0.0708363
M715T314	0.314245	0.0704004
M634T50	0.344151	0.0702886
M419T454	0.638232	0.0699137
M746T308	0.920893	0.0698178
M152T317	0.255664	0.0697706
M402T49	0.249922	0.0692308
M267T708	0.349119	0.0691101
M454T404	0.795395	0.0690569
M115T162	0.819657	0.0687726
M814T464	0.754694	0.0687242
M834T447	0.84012	0.0684234
M481T160	0.0395817	0.0682647
M211T738	0.543284	0.0682235
M203T316	0.139176	0.0681491
M363T49	0.189206	0.067987
M516T61	0.148883	0.0677523
M794T447	0.795427	0.0673599
M540T49	0.334048	0.0672469
M571T700	0.177981	0.0670658
M604T50	0.200517	0.0670249
M395T48	0.215261	0.0669722
M793T292	0.606069	0.0665119
M440T50	0.22272	0.0663981
M467T377	0.453477	0.0663758
M498T706	0.505217	0.0663583
M396T49	0.176972	0.0663231
M502T50	0.311681	0.0660919
M572T50	0.256348	0.0660789
M618T292	0.33814	0.0660758
M548T51	0.252773	0.0660449
M600T51	0.34905	0.0659992
M134T81	0.248414	0.0657851
M280T785	0.4752	0.0656358
M709T488	0.755107	0.0655203
M763T305	0.600304	0.0653524
M629T50	0.37837	0.0652525
M557T50	0.226197	0.0651453
M584T50	0.327242	0.0649006
M224T314	0.330105	0.0648032
M325T68	0.217519	0.0644629
M350T49	0.172344	0.0641482
M598T50	0.254602	0.0640678
M601T61	0.145413	0.0634811
M812T304	0.263741	0.0634329
M452T49_2	0.187174	0.0633325
M932T298	0.196195	0.0632211
M442T49	0.289617	0.0632004
M829T451	0.631253	0.0631189
M293T336	0.280037	0.0629207
M910T298	0.250641	0.0628906
M679T51	0.302402	0.062878
M289T162	0.332084	0.0627398
M646T50	0.201391	0.0626632
M806T458	0.654574	0.0625162
M419T49	0.251005	0.062503
M464T379	0.746744	0.0623794
M158T366	0.459667	0.0620309
M155T316	0.105803	0.0618275
M268T706	0.610555	0.0618065
M131T324	0.64291	0.0615399
M204T316	0.12727	0.0614463
M165T317	0.415357	0.0611719
M780T466	0.490733	0.0611147
M395T327	0.141695	0.0610267
M150T318	1.00974	0.0610216
M431T61	0.143426	0.0610121
M660T50	0.271632	0.0609984
M704T50	0.200695	0.0609882
M90T318	0.371373	0.060633
M410T49	0.564455	0.0605452
M407T85	0.206661	0.0605034
M601T50	0.250545	0.0602495
M296T699	0.529005	0.0602189
M752T43	0.238078	0.0601405
M244T315	0.388941	0.0599572
M472T48	0.271905	0.0595952
M546T50	0.302794	0.0594676
M187T59	0.340605	0.0592336
M157T785	0.781314	0.0591908
M513T50	0.222354	0.059167
M234T242	0.198353	0.0588216
M471T49	0.265618	0.0587893
M506T48	0.0517792	0.0586657
M334T49	0.356513	0.058417
M484T50	0.282445	0.0581974
M351T49	0.207624	0.0579762
M483T396	0.694578	0.0577712
M86T317	1.20909	0.0576901
M768T305	0.975059	0.0576641
M911T298	0.129644	0.0572695
M125T785	0.347058	0.0572494
M260T785	0.598162	0.0571037
M788T61	0.19645	0.057083
M521T704	0.61181	0.0570277
M693T506	0.863313	0.0567502
M386T50	0.20603	0.0565909
M388T49	0.225449	0.0561316
M177T47	0.147136	0.0560822
M180T417	0.2744	0.0557764
M237T349	0.225502	0.0557414
M567T48	0.0282294	0.0556295
M689T51	0.232807	0.0555908
M464T48	0.241057	0.0553248
M619T292	0.170231	0.0552836
M633T46	0.369306	0.0550606
M119T316	0.331237	0.0543689
M633T162	0.0747603	0.054234
M295T50	0.251409	0.0541713
M796T449	0.580593	0.0541538
M643T50	0.265767	0.0539578
M176T243	0.434633	0.053906
M792T450	0.648232	0.053798
M157T316	0.046374	0.0534043
M752T301	0.717288	0.0529667
M273T163	0.19595	0.0527978
M276T315	0.325121	0.0527829
M787T304	0.611266	0.0526772
M481T398	0.892284	0.0526055
M644T50	0.303562	0.052296
M766T456	0.54124	0.0522892
M750T301	0.492716	0.0521979
M517T785	0.418819	0.0518304
M631T48	0.432088	0.0517709
M182T317	0.977889	0.051408
M186T323	0.385943	0.0508091
M495T707	0.632368	0.0504863
M160T180	0.542415	0.050395
M469T49	0.300089	0.0501213
M744T309	0.571262	0.0498936
M820T290	0.236623	0.0497426
M803T465	0.628201	0.0492022
M632T47	0.303036	0.0488038
M133T317	0.865929	0.0487963
M72T318	0.829401	0.0480759
M550T699	0.0509251	0.0478442
M723T303	0.733102	0.047452
M405T161	0.268228	0.0474256
M822T291	0.204819	0.0473949
M175T52	0.282755	0.0473788
M779T301	0.464758	0.0470721
M524T394	0.0741675	0.0468068
M129T785	0.330534	0.0466464
M777T46	0.172751	0.0462757
M543T50	0.227465	0.0458294
M282T703	0.233207	0.045769
M169T785	0.403581	0.0454423
M670T363	0.543424	0.0453124
M163T316	0.42352	0.0453035
M478T402	0.835023	0.0443343
M418T453	0.517462	0.0433574
M770T304	0.895555	0.0431693
M754T300	0.593673	0.0427579
M136T317	0.420671	0.0427497
M508T705	0.556354	0.0424672
M778T300	0.368817	0.0423982
M765T306	0.858691	0.0421163
M724T303	0.501216	0.0417541
M427T786	0.263926	0.0416037
M205T316	0.46225	0.0413085
M798T453	0.510829	0.0411593
M793T304	0.609231	0.0410607
M811T303	0.396108	0.0409688
M499T50	0.250722	0.0409125
M486T47	0.171749	0.0408255
M149T785	0.638714	0.0406851
M436T713	0.354942	0.0403557
M649T50	0.275533	0.0401971
M276T699	0.476238	0.0392407
M754T728	0.454878	0.0391033
M661T51	0.185321	0.0389063
M739T306	0.598708	0.0387872
M703T307	0.557435	0.0381807
M458T49	0.276757	0.0380077
M798T290	0.261516	0.0376622
M167T317	0.408899	0.0376619
M468T711	0.470526	0.0373206
M749T300	0.748018	0.036703
M188T316	0.317093	0.0364624
M753T728	0.425404	0.0360203
M861T292	0.328491	0.0355641
M578T291	0.391944	0.0353589
M630T50	0.253311	0.0348947
M579T292	0.253817	0.0347553
M788T304	0.424541	0.0343547
M151T318	0.27512	0.034291
M701T305	0.360578	0.0342479
M465T309	0.273039	0.0336862
M804T455	0.462805	0.0336232
M796T291	0.254093	0.0334893
M814T302	0.346289	0.0332085
M112T785	0.309714	0.0329047
M312T785	0.279724	0.0321628
M729T305	0.470427	0.0319659
M726T301	0.620352	0.0312721
M300T49	0.423736	0.030717
M777T300	0.557534	0.030544
M410T786	0.422598	0.0300102
M815T302	0.458345	0.0282954
M743T459	0.514257	0.0279951
M742T308	0.565238	0.0269195
M510T704	0.482209	0.0253205
M813T303	0.509473	0.0251695
M117T161	0.287964	0.0249691
M698T732	0.372903	0.0246364
M862T292	0.221525	0.0225144
M727T305	0.463584	0.0215175

## Sheet: VIP>1
Var ID (Primary)	2.44693 * M1.VIP[1]cvSE	BLANK-01.mzdata	BLANK-02.mzdata	BLANK-03.mzdata	BLANK-04.mzdata	BLANK-05.mzdata	BLANK-06.mzdata	FA30-01.mzdata	FA30-02.mzdata	FA30-03.mzdata	FA30-04.mzdata	FA30-05.mzdata	FA30-06.mzdata	p value
M130T292	1.13764	0.0249886	0.0238193	0.0249268	0.0309171	0.0254627	0.0249838	0.0451932	0.0498829	0.0830136	0.0404078	0.0615354	0.0864421	0.00142924
M132T114	1.11989	0.0320118	0.0311501	0.0303977	0.0152536	0.0172815	0.0326883	0.0155721	0.00694223	0.00409499	0.00351507	0.0044351	0.00427189	0.000336867
M132T80	1.28353	0.1138	0.103328	0.109424	0.1365	0.108789	0.117832	0.0840577	0.0402447	0.0221471	0.0213028	0.0217494	0.0186931	3.57054e-05
M143T41	1.18002	0.0031288	0.00326318	0.00764133	0.00739998	0.00705456	0.00373812	0.00787335	0.0179163	0.0174909	0.0123543	0.0228562	0.0390369	0.01028
M154T260	1.32132	0.238776	0.238707	0.239832	0.222064	0.240169	0.24082	0.235322	0.240227	0.243007	0.24354	0.239573	0.243245	0.233029
M158T594	4.87122	0.172676	0.17479	0.191665	0.291189	0.190451	0.197781	0.262002	0.303456	0.526284	0.265821	0.526699	0.724832	0.0147823
M159T33	1.1949	0.0130812	0.0127487	0.0130672	0.015184	0.0127315	0.013235	0.0159707	0.0189649	0.0349868	0.0169875	0.0327261	0.0460618	0.0170123
M159T594	1.59047	0.0181211	0.0179274	0.0203922	0.0282878	0.0189152	0.020024	0.0261784	0.0297129	0.0527233	0.0268188	0.0524568	0.072896	0.0160535
M165T70	2.53802	0.00137708	0.00119574	0.00149717	0.0016728	0.00127039	0.00146471	0.000739538	0.000460461	4.74305e-05	0.000183985	0.000156094	0.0447898	0.414108
M199T253	1.00727	0.0111964	0.0112301	0.0137284	0.00804323	0.0107045	0.010106	0.0120077	0.0135909	0.0227636	0.0121868	0.0227195	0.0317017	0.0310282
M200T292	1.29832	0.177738	0.181378	0.179318	0.157808	0.179378	0.180369	0.181729	0.193513	0.146298	0.162383	0.173652	0.193914	0.930904
M202T292	1.11562	0.0510331	0.0499806	0.047712	0.0491265	0.0477638	0.0462839	0.0599881	0.0640859	0.046887	0.0514211	0.0578342	0.0629333	0.0133378
M226T990	1.80462	0.00294939	0.0249691	0.0110689	0.0829936	0.0153353	0.00377056	0.0115731	0.0213774	0.0172132	0.022272	0.0293612	0.0181437	0.785147
M227T33	2.38006	0.0472257	0.0450826	0.0466902	0.0537173	0.0457147	0.0472215	0.0565031	0.0721763	0.13435	0.0629607	0.124412	0.179342	0.0167767
M228T1001	1.46801	0.0042856	0.0167834	0.00720291	0.0559387	0.00986043	0.00415415	0.00993606	0.0139931	0.0122035	0.0142129	0.0204333	0.0142083	0.794898
M228T590	1.67803	0.00708283	0.00977489	0.00565745	0.036104	0.00720371	0.0045644	0.00558693	0.00788947	0.00623921	0.00636598	0.00918421	0.00716015	0.36918
M244T1002	1.2464	0.00306011	0.0116542	0.00512633	0.0393508	0.00711549	0.0028931	0.00664721	0.010118	0.00806393	0.0099028	0.0148848	0.00875174	0.763314
M244T534	1.18474	0.0104327	0.0149146	0.00830809	0.0343893	0.0109999	0.00901485	0.0194917	0.0208471	0.016132	0.0135172	0.0308626	0.0179232	0.305101
M256T930	2.09041	0.0333074	0.0581946	0.0228618	0.0722821	0.0164615	0.0277193	0.0646219	0.0828391	0.111629	0.0350594	0.0599112	0.0753908	0.0367585
M282T1003	1.86476	0.0190218	0.0351912	0.0115839	0.041345	0.00755012	0.0127738	0.0304958	0.0333775	0.0486573	0.0146756	0.0233186	0.0373651	0.202966
M282T952	3.83621	0.0824652	0.153606	0.0496722	0.183216	0.0326313	0.0561297	0.134318	0.155188	0.234645	0.0720795	0.109026	0.161762	0.156428
M283T952	1.63256	0.0154162	0.0294768	0.00975866	0.0351225	0.00661848	0.0106881	0.0254805	0.0313644	0.0461122	0.0137968	0.022627	0.0321987	0.130063
M284T1013	2.4772	0.0219729	0.0382502	0.0175326	0.0734065	0.0117275	0.017771	0.04243	0.0534996	0.0718234	0.024288	0.0394048	0.0527182	0.163177
M284T1100	1.25033	0.0113222	0.00987299	0.0103408	0.0196967	0.00793434	0.00925913	0.0119737	0.0122122	0.0193184	0.00982324	0.0112535	0.0126689	0.516751
M285T1013	1.04041	0.00453081	0.00771041	0.00354873	0.0144807	0.00253639	0.00372874	0.00829251	0.0110711	0.0142068	0.00485142	0.00872105	0.011114	0.137404
M308T61	1.09022	0.0971556	0.103686	0.112988	0.0868481	0.105416	0.0951232	0.00176625	0.000524458	4.09354e-05	5.48417e-05	0.000159733	0.000348491	1.25218e-10
M310T1025	2.12887	0.00127681	0.012749	0.0102397	0.0696673	0.0157281	0.00230632	0.00465736	0.0126385	0.00776022	0.0107776	0.0107938	0.0162333	0.457533
M312T540	1.92003	2.30447e-05	0	0	0	0	0	0.0813978	0.0859983	0.0758393	0.0678836	0.134079	0.0464368	4.1954e-05
M315T594	1.0112	0.00678516	0.00693484	0.00774688	0.0116751	0.0072875	0.00756475	0.0109571	0.0123811	0.0225593	0.0111693	0.0222295	0.0310707	0.0126935
M330T703	1.80251	0.00375918	0.0101257	0.0354564	0.0797192	0.00308601	0.00335519	0.0082509	0.0108063	0.0119063	0.00530096	0.0435004	0.0102718	0.594283
M336T1040	1.25752	0.000340158	0.00362058	0.00315632	0.0208384	0.00451674	0.000538078	0.00127094	0.00315304	0.00200909	0.0032011	0.00391028	0.00381413	0.430113
M336T894	1.09873	0.00158163	0.00809592	0.00651635	0.0216164	0.00950585	0.00226855	0.00354914	0.00666371	0.00401047	0.00478882	0.0100648	0.00621371	0.462637
M338T1088	2.81868	0.0110271	0.0847592	0.0794818	0.209672	0.106773	0.0168274	0.0292482	0.0680145	0.0526996	0.0681502	0.0903557	0.0902166	0.568219
M338T1124	2.28737	0.00343155	0.0260257	0.0246234	0.0868421	0.0335405	0.0052774	0.00828084	0.0202029	0.0149807	0.0207976	0.0269131	0.0253449	0.426283
M339T1088	1.33642	0.00285264	0.0200958	0.018686	0.0494979	0.0243825	0.00422984	0.00699357	0.0169957	0.0123771	0.0165722	0.0216855	0.0221949	0.612223
M352T919	1.16396	0.000930035	0.00500305	0.00452919	0.00702963	0.012398	0.00106252	0.00509385	0.00895565	0.00559734	0.00681834	0.0168513	0.00675164	0.230429
M354T617	3.74224	0	0	0	0	0	0	0.28091	0.253792	0.19094	0.234367	0.137208	0.0242467	0.000668717
M355T617	1.69033	0	0	0	0	0	0	0.0584712	0.0533218	0.0403937	0.0485234	0.0294635	0.00608618	0.000526415
M358T760	2.31062	0.0109881	0.0296735	0.086724	0.179863	0.00848765	0.00845311	0.0253371	0.0328555	0.0279897	0.0151036	0.1333	0.028408	0.76572
M359T760	1.05451	0.00248795	0.00730948	0.020581	0.0410558	0.00224775	0.00206154	0.0062369	0.00808635	0.00707899	0.00380022	0.0312023	0.00743374	0.799758
M360T1088	3.23542	0.00014958	0.00804574	0.00587501	0.097044	0.00834991	0.000348614	0.00128574	0.00455149	0.0018857	0.00561793	0.00544207	0.00592242	0.330797
M361T1088	1.58249	4.29773e-05	0.00201861	0.00145934	0.0228285	0.00205176	4.68236e-05	0.00027316	0.00121054	0.000433408	0.0014527	0.00132072	0.00130799	0.328496
M363T33	1.32414	0.012466	0.0115487	0.0116004	0.0137304	0.0122004	0.0124744	0.0137932	0.0180108	0.0349761	0.0163652	0.0330086	0.0492664	0.0228623
M376T617	1.20161	0	0	0	0	0	0	0.0290681	0.0256851	0.0187927	0.0232033	0.0137673	0.00310422	0.000601732
M376T673	1.13238	0.0130067	0.0135612	0.0116471	0.024628	0.0132114	0.01245	0.0129725	0.0178933	0.0228451	0.0176206	0.0181357	0.0171873	0.230776
M408T1001	1.94577	0.00194888	0.0109116	0.00347135	0.070913	0.00420235	0.00184224	0.00718974	0.00947813	0.00673073	0.00938034	0.0131917	0.00898934	0.580868
M480T788	1.66327	0.00381134	0.00403285	0.00391997	0.029758	0.00423188	0.0053967	0.00132546	0.00127632	0.000540201	0.000609803	0.000618795	0.00113478	0.10413
M482T847	1.37932	0.00406772	0.00431155	0.00402933	0.0231967	0.00383243	0.00433681	0.000827219	0.00050404	0.000127946	0.000386241	0.000195757	0.000199804	0.0547234
M496T770	1.87175	0.00525032	0.00489168	0.00509914	0.0333583	0.00465651	0.00588854	0.00453644	0.0040906	0.00388104	0.00359727	0.00340813	0.00386711	0.234003
M497T770	1.00393	0.00109828	0.00113007	0.00147831	0.00896442	0.00117295	0.00124083	0.00108309	0.00089366	0.00093637	0.00101539	0.000599489	0.00101998	0.247158
M502T743	1.3143	0.00339454	0.00346329	0.00440153	0.019235	0.00632133	0.00838766	0.00439054	0.00441795	0.0018188	0.00216138	0.00234963	0.00467267	0.12473
M522T793	1.90918	0.00392531	0.00395383	0.00386739	0.0342713	0.00352416	0.00446871	0.0024362	0.00215409	0.00204303	0.00216795	0.00167314	0.00224074	0.20335
M523T794	1.02594	0.00119749	0.00117918	0.0010729	0.010102	0.000973579	0.00125963	0.000750161	0.000638905	0.000344025	0.000559663	0.000382	0	0.175558
M551T1036	2.29201	0.00523533	0.00698901	0.00564072	0.00191896	0.00529051	0.00477563	0.0864145	0.0212473	0.016583	0.0116575	0.0258787	0.0274417	0.0399266
M552T1035	1.52301	0.00203729	0.00293852	0.0021672	0.000681695	0.0021439	0.00176484	0.0356602	0.008147	0.0068137	0.00421313	0.0100028	0.00989487	0.0508366
M566T1137	1.24797	0.0029224	0.00580313	0.00489015	0	0.000380202	0.00467583	0.00470132	0.0108738	0.01227	0.00526065	0.0263215	0.00806403	0.0378621
M707T617	1.37751	0	0	0	0	0	0	0.0277893	0.0235944	0.0109007	0.0204081	0.00557414	5.79004e-05	0.00794467
M729T617	1.25004	0	0	0	0	0	0	0.0246328	0.0207112	0.0111311	0.0177317	0.00651795	0.000130295	0.0050778
M81T42	1.89798	0	0	0.000467773	0.0124575	0	0	0.00100543	0.00115671	0.00175137	0	0	0.0359018	0.487163
M839T33	1.06063	0.0062412	0.00603024	0.00617419	0.00657138	0.00607178	0.00628906	0.00645636	0.00867115	0.0186499	0.00701083	0.0161983	0.0266088	0.0399904
M91T33	1.14823	0.0118586	0.0116877	0.0121587	0.0139216	0.0116695	0.0122544	0.0145843	0.0179645	0.0302126	0.0152402	0.0288844	0.0411971	0.0165832

## Sheet: VIP>1 P<0.05
Var ID (Primary)	mzmed	rtmed	2.44693 * M1.VIP[1]cvSE	BLANK-01.mzdata	BLANK-02.mzdata	BLANK-03.mzdata	BLANK-04.mzdata	BLANK-05.mzdata	BLANK-06.mzdata	FA30-01.mzdata	FA30-02.mzdata	FA30-03.mzdata	FA30-04.mzdata	FA30-05.mzdata	FA30-06.mzdata	p value
M130T292	130.159	4.868	1.13764	0.0249886	0.0238193	0.0249268	0.0309171	0.0254627	0.0249838	0.0451932	0.0498829	0.0830136	0.0404078	0.0615354	0.0864421	0.00142924
M132T114	132.102	1.908	1.11989	0.0320118	0.0311501	0.0303977	0.0152536	0.0172815	0.0326883	0.0155721	0.00694223	0.00409499	0.00351507	0.0044351	0.00427189	0.000336867
M132T80	132.102	1.34	1.28353	0.1138	0.103328	0.109424	0.1365	0.108789	0.117832	0.0840577	0.0402447	0.0221471	0.0213028	0.0217494	0.0186931	3.57054e-05
M143T41	142.948	0.685	1.18002	0.0031288	0.00326318	0.00764133	0.00739998	0.00705456	0.00373812	0.00787335	0.0179163	0.0174909	0.0123543	0.0228562	0.0390369	0.01028
M158T594	158.154	9.906	4.87122	0.172676	0.17479	0.191665	0.291189	0.190451	0.197781	0.262002	0.303456	0.526284	0.265821	0.526699	0.724832	0.0147823
M159T33	158.964	0.556	1.1949	0.0130812	0.0127487	0.0130672	0.015184	0.0127315	0.013235	0.0159707	0.0189649	0.0349868	0.0169875	0.0327261	0.0460618	0.0170123
M159T594	159.157	9.906	1.59047	0.0181211	0.0179274	0.0203922	0.0282878	0.0189152	0.020024	0.0261784	0.0297129	0.0527233	0.0268188	0.0524568	0.072896	0.0160535
M199T253	199.144	4.2085	1.00727	0.0111964	0.0112301	0.0137284	0.00804323	0.0107045	0.010106	0.0120077	0.0135909	0.0227636	0.0121868	0.0227195	0.0317017	0.0310282
M202T292	202.045	4.866	1.11562	0.0510331	0.0499806	0.047712	0.0491265	0.0477638	0.0462839	0.0599881	0.0640859	0.046887	0.0514211	0.0578342	0.0629333	0.0133378
M227T33	226.952	0.551	2.38006	0.0472257	0.0450826	0.0466902	0.0537173	0.0457147	0.0472215	0.0565031	0.0721763	0.13435	0.0629607	0.124412	0.179342	0.0167767
M256T930	256.265	15.506	2.09041	0.0333074	0.0581946	0.0228618	0.0722821	0.0164615	0.0277193	0.0646219	0.0828391	0.111629	0.0350594	0.0599112	0.0753908	0.0367585
M308T61	308.092	1.011	1.09022	0.0971556	0.103686	0.112988	0.0868481	0.105416	0.0951232	0.00176625	0.000524458	4.09354e-05	5.48417e-05	0.000159733	0.000348491	1.25218e-10
M312T540	312.124	9.002	1.92003	2.30447e-05	0	0	0	0	0	0.0813978	0.0859983	0.0758393	0.0678836	0.134079	0.0464368	4.1954e-05
M315T594	315.302	9.906	1.0112	0.00678516	0.00693484	0.00774688	0.0116751	0.0072875	0.00756475	0.0109571	0.0123811	0.0225593	0.0111693	0.0222295	0.0310707	0.0126935
M354T617	354.135	10.2845	3.74224	0	0	0	0	0	0	0.28091	0.253792	0.19094	0.234367	0.137208	0.0242467	0.000668717
M355T617	355.138	10.285	1.69033	0	0	0	0	0	0	0.0584712	0.0533218	0.0403937	0.0485234	0.0294635	0.00608618	0.000526415
M363T33	362.927	0.549	1.32414	0.012466	0.0115487	0.0116004	0.0137304	0.0122004	0.0124744	0.0137932	0.0180108	0.0349761	0.0163652	0.0330086	0.0492664	0.0228623
M376T617	376.116	10.286	1.20161	0	0	0	0	0	0	0.0290681	0.0256851	0.0187927	0.0232033	0.0137673	0.00310422	0.000601732
M551T1036	550.631	17.267	2.29201	0.00523533	0.00698901	0.00564072	0.00191896	0.00529051	0.00477563	0.0864145	0.0212473	0.016583	0.0116575	0.0258787	0.0274417	0.0399266
M566T1137	565.569	18.954	1.24797	0.0029224	0.00580313	0.00489015	0	0.000380202	0.00467583	0.00470132	0.0108738	0.01227	0.00526065	0.0263215	0.00806403	0.0378621
M707T617	707.262	10.278	1.37751	0	0	0	0	0	0	0.0277893	0.0235944	0.0109007	0.0204081	0.00557414	5.79004e-05	0.00794467
M729T617	729.244	10.278	1.25004	0	0	0	0	0	0	0.0246328	0.0207112	0.0111311	0.0177317	0.00651795	0.000130295	0.0050778
M839T33	838.84	0.547	1.06063	0.0062412	0.00603024	0.00617419	0.00657138	0.00607178	0.00628906	0.00645636	0.00867115	0.0186499	0.00701083	0.0161983	0.0266088	0.0399904
M91T33	90.9768	0.551	1.14823	0.0118586	0.0116877	0.0121587	0.0139216	0.0116695	0.0122544	0.0145843	0.0179645	0.0302126	0.0152402	0.0288844	0.0411971	0.0165832
