# Supplementary material for: A multi-omics study of the anti-cancer effect of a ferulic acid derivative FA-30
Source: Royal Society of Chemistry journal article supplement (doi:10.1039/d2mo00025c), 2022-07-27
Supplement: d2mo00025c5.xlsx [file d2mo00025c5.xlsx]

## Sheet: Metadata
_RESULTS_version	5
RESULTS_SEARCH_STAT_search_begin_time_clock	02/02/2021 19:26:30
RESULTS_SEARCH_STAT_search_end_time_clock	02/03/2021 09:42:24
RESULTS_SEARCH_STAT_search_time_duration	#VALUE!
RESULTS_SEARCH_STAT_stage_signal_processing_begin_time_clock	02/02/2021 19:26:30
RESULTS_SEARCH_STAT_stage_signal_processing_end_time_clock	02/02/2021 20:35:11
RESULTS_SEARCH_STAT_stage_signal_processing_time_duration	#VALUE!
RESULTS_SEARCH_STAT_stage_waiting_begin_time_clock	02/02/2021 20:35:11
RESULTS_SEARCH_STAT_stage_waiting_end_time_clock	02/02/2021 20:35:28
RESULTS_SEARCH_STAT_stage_waiting_time_duration	1944-06-24
RESULTS_SEARCH_STAT_stage_searching_begin_time_clock	02/02/2021 20:35:28
RESULTS_SEARCH_STAT_stage_searching_end_time_clock	02/03/2021 09:38:07
RESULTS_SEARCH_STAT_stage_searching_time_duration	#VALUE!
RESULTS_SEARCH_STAT_stage_fdr_begin_time_clock	02/03/2021 09:38:08
RESULTS_SEARCH_STAT_stage_fdr_end_time_clock	02/03/2021 09:42:24
RESULTS_SEARCH_STAT_stage_fdr_time_duration	2601-03-28
RESULTS_SEARCH_STAT_task_fraglet_exe_begin_time_clock	02/03/2021 05:03:30
RESULTS_SEARCH_STAT_task_fraglet_exe_end_time_clock	02/03/2021 05:20:01
RESULTS_SEARCH_STAT_task_fraglet_exe_time_duration	991302
RESULTS_SEARCH_STAT_task_fraglet_exe_time_cpu	#VALUE!
RESULTS_SEARCH_STAT_task_taglet_exe_begin_time_clock	02/03/2021 05:58:18
RESULTS_SEARCH_STAT_task_taglet_exe_end_time_clock	02/03/2021 08:41:44
RESULTS_SEARCH_STAT_task_taglet_exe_time_duration	9805756
RESULTS_SEARCH_STAT_task_taglet_exe_time_cpu	#VALUE!
RESULTS_SEARCH_STAT_task_progroup_begin_time_clock	02/03/2021 08:41:44
RESULTS_SEARCH_STAT_task_progroup_end_time_clock	02/03/2021 09:38:06
RESULTS_SEARCH_STAT_task_progroup_time_duration	3382454
RESULTS_SEARCH_STAT_task_progroup_time_cpu	#VALUE!
RESULTS_SEARCH_STAT_task_focusing_begin_time_clock	02/03/2021 05:20:01
RESULTS_SEARCH_STAT_task_focusing_end_time_clock	02/03/2021 05:58:18
RESULTS_SEARCH_STAT_task_focusing_time_duration	2296665
RESULTS_SEARCH_STAT_task_focusing_time_cpu	11633696
RESULTS_SEARCH_STAT_computer_memory	32689
RESULTS_SEARCH_STAT_computer_name	OMICS-PC
RESULTS_SEARCH_STAT_num_proteins	40786
RESULTS_SEARCH_STAT_num_residues	22728438
RESULTS_SEARCH_STAT_number_cores	16
RESULTS_SEARCH_STAT_number_licensed_tasks	16
RESULTS_SEARCH_STAT_number_processors	32
RESULTS_SEARCH_STAT_os	Windows 7 Professional Service Pack 1 (6.1.7601)
RESULTS_SEARCH_1_time_cpu	63991
RESULTS_SEARCH_1_time_duration	64134
RESULTS_SEARCH_1_version	5.0.2.5174
RESULTS_SEARCH_1_xml:id	SEARCH:1:637478907898508600_0
RESULTS_SEARCH_1_PARAMETERS_chemical_data_edited	FALSE
RESULTS_SEARCH_1_PARAMETERS_do_multiprecursor_search	TRUE
RESULTS_SEARCH_1_PARAMETERS_do_reverse_search	TRUE
RESULTS_SEARCH_1_PARAMETERS_max_quant_labels	35
RESULTS_SEARCH_1_PARAMETERS_maxresults	15
RESULTS_SEARCH_1_PARAMETERS_separate_searches	FALSE
RESULTS_SEARCH_1_PARAMETERS_MSTOLERANCE_type	dalton
RESULTS_SEARCH_1_PARAMETERS_MSTOLERANCE_value	0.05
RESULTS_SEARCH_1_PARAMETERS_MSMSTOLERANCE_type	dalton
RESULTS_SEARCH_1_PARAMETERS_MSMSTOLERANCE_value	0.1
RESULTS_SEARCH_1_PARAMETERS_MS_STANDARD_DEVIATION_type	dalton
RESULTS_SEARCH_1_PARAMETERS_MS_STANDARD_DEVIATION_value	0.0011
RESULTS_SEARCH_1_PARAMETERS_MSMS_STANDARD_DEVIATION_type	dalton
RESULTS_SEARCH_1_PARAMETERS_MSMS_STANDARD_DEVIATION_value	0.01
RESULTS_SEARCH_1_PARAMETERS_FASTA_filename	C:\AB SCIEX\ProteinPilot Data\SearchDatabases\uniprot_Human_reviewed_20210202.fasta
RESULTS_SEARCH_1_PARAMETERS_AUTO_CALIBRATION_ms	TRUE
RESULTS_SEARCH_1_PARAMETERS_AUTO_CALIBRATION_msexport	FALSE
RESULTS_SEARCH_1_PARAMETERS_AUTO_CALIBRATION_msms	TRUE
RESULTS_SEARCH_1_PARAMETERS_AUTO_CALIBRATION_msmstolsdratio	2.75
RESULTS_SEARCH_1_PARAMETERS_AUTO_CALIBRATION_mstolsdratio	7
RESULTS_SEARCH_1_PARAMETERS_AUTO_CALIBRATION_squareroot	TRUE
RESULTS_SEARCH_1_PARAMETERS_AUTO_CALIBRATION_type	dalton
RESULTS_SEARCH_1_PARAMETERS_AUTO_CALIBRATION_MCP_d_s_s_f	0.0666667
RESULTS_SEARCH_1_PARAMETERS_AUTO_CALIBRATION_MCP_d_s_w_f	3
RESULTS_SEARCH_1_PARAMETERS_AUTO_CALIBRATION_MCP_m_f_r_mbc	200
RESULTS_SEARCH_1_PARAMETERS_AUTO_CALIBRATION_MCP_m_m_c	10
RESULTS_SEARCH_1_PARAMETERS_AUTO_CALIBRATION_MCP_m_m_f_s	0.25
RESULTS_SEARCH_1_PARAMETERS_AUTO_CALIBRATION_MCP_m_m_p_f	0.33
RESULTS_SEARCH_1_PARAMETERS_AUTO_CALIBRATION_MCP_m_m_p_rms_f	1
RESULTS_SEARCH_1_PARAMETERS_AUTO_CALIBRATION_MCP_m_p_t_f	1
RESULTS_SEARCH_1_PARAMETERS_AUTO_CALIBRATION_MCP_m_r_h_n_b	15
RESULTS_SEARCH_1_PARAMETERS_AUTO_CALIBRATION_MCP_m_z_n_s	99
RESULTS_SEARCH_1_PARAMETERS_AUTO_CALIBRATION_MCP_m_z_s_mn_f_r	0.0666667
RESULTS_SEARCH_1_PARAMETERS_AUTO_CALIBRATION_MCP_m_z_s_mx_f_r	0.1
RESULTS_SEARCH_1_PARAMETERS_MS_AUTO_CALIBRATION_OUT_avres	-1.79226e-08
RESULTS_SEARCH_1_PARAMETERS_MS_AUTO_CALIBRATION_OUT_c0	-0.000697596
RESULTS_SEARCH_1_PARAMETERS_MS_AUTO_CALIBRATION_OUT_c1minus1	2.7728e-05
RESULTS_SEARCH_1_PARAMETERS_MS_AUTO_CALIBRATION_OUT_c2	0
RESULTS_SEARCH_1_PARAMETERS_MS_AUTO_CALIBRATION_OUT_file	1
RESULTS_SEARCH_1_PARAMETERS_MS_AUTO_CALIBRATION_OUT_partnumber	1
RESULTS_SEARCH_1_PARAMETERS_MS_AUTO_CALIBRATION_OUT_polyorder	1
RESULTS_SEARCH_1_PARAMETERS_MS_AUTO_CALIBRATION_OUT_sample	1
RESULTS_SEARCH_1_PARAMETERS_MS_AUTO_CALIBRATION_OUT_squareroot	TRUE
RESULTS_SEARCH_1_PARAMETERS_MSMS_AUTO_CALIBRATION_OUT_avres	-1.31555e-07
RESULTS_SEARCH_1_PARAMETERS_MSMS_AUTO_CALIBRATION_OUT_c0	-0.000160778
RESULTS_SEARCH_1_PARAMETERS_MSMS_AUTO_CALIBRATION_OUT_c1minus1	8.35011e-06
RESULTS_SEARCH_1_PARAMETERS_MSMS_AUTO_CALIBRATION_OUT_c2	0
RESULTS_SEARCH_1_PARAMETERS_MSMS_AUTO_CALIBRATION_OUT_file	1
RESULTS_SEARCH_1_PARAMETERS_MSMS_AUTO_CALIBRATION_OUT_partnumber	1
RESULTS_SEARCH_1_PARAMETERS_MSMS_AUTO_CALIBRATION_OUT_polyorder	1
RESULTS_SEARCH_1_PARAMETERS_MSMS_AUTO_CALIBRATION_OUT_sample	1
RESULTS_SEARCH_1_PARAMETERS_MSMS_AUTO_CALIBRATION_OUT_squareroot	TRUE
RESULTS_SEARCH_1_PARAMETERS_MAX_PRECURSORS_FRAGLET	5
RESULTS_SEARCH_1_PARAMETERS_MAX_PRECURSORS_TAGLET	1
RESULTS_SEARCH_1_PARAMETERS_PRECURSORS_DR_FRAGLET	10
RESULTS_SEARCH_1_PARAMETERS_PRECURSORS_DR_TAGLET	3
RESULTS_SEARCH_1_PARAMETERS_DEFAULT_CHARGE_STATE_1_charge	2
RESULTS_SEARCH_1_PARAMETERS_DEFAULT_CHARGE_STATE_1_probability	1
RESULTS_SEARCH_1_PARAMETERS_DEFAULT_CHARGE_STATE_2_charge	3
RESULTS_SEARCH_1_PARAMETERS_DEFAULT_CHARGE_STATE_2_probability	1
RESULTS_SEARCH_1_PARAMETERS_DEFAULT_CHARGE_STATE_3_charge	4
RESULTS_SEARCH_1_PARAMETERS_DEFAULT_CHARGE_STATE_3_probability	1
RESULTS_SEARCH_1_PARAMETERS_VERSION	5.0.2.0, 5346
RESULTS_SEARCH_1_PARAMETERS_PARAGON_VERSION	5.0.2.0, 5174
RESULTS_SEARCH_1_PARAMETERS_APPLICATION	ProteinPilot(tm) Software
RESULTS_SEARCH_1_PARAMETERS_PROGROUP_alternativedispositionmaximumfoldprobabilitydrop	100
RESULTS_SEARCH_1_PARAMETERS_PROGROUP_alternativedispositionmaximumfoldscoredrop	2
RESULTS_SEARCH_1_PARAMETERS_PROGROUP_autodiscordantpeptidethreshold	0.3
RESULTS_SEARCH_1_PARAMETERS_PROGROUP_bayesconfidencecalclulation	TRUE
RESULTS_SEARCH_1_PARAMETERS_PROGROUP_calibrateconfidence	TRUE
RESULTS_SEARCH_1_PARAMETERS_PROGROUP_compresspeptides	FALSE
RESULTS_SEARCH_1_PARAMETERS_PROGROUP_confidencepercentthresholdforexcludingothersfromquant	15
RESULTS_SEARCH_1_PARAMETERS_PROGROUP_confidencepercentthresholdforincludingselfinquant	15
RESULTS_SEARCH_1_PARAMETERS_PROGROUP_donotstoremspeaklists	FALSE
RESULTS_SEARCH_1_PARAMETERS_PROGROUP_fasta	C:\AB SCIEX\ProteinPilot Data\SearchDatabases\uniprot_Human_reviewed_20210202.fasta
RESULTS_SEARCH_1_PARAMETERS_PROGROUP_featuregroupminpepconf	0.66
RESULTS_SEARCH_1_PARAMETERS_PROGROUP_featuregroupminups	0.47
RESULTS_SEARCH_1_PARAMETERS_PROGROUP_focusingintersection	4
RESULTS_SEARCH_1_PARAMETERS_PROGROUP_focusingminimummatchconfidence	0.1
RESULTS_SEARCH_1_PARAMETERS_PROGROUP_focusingminunusedprotscore	0.1
RESULTS_SEARCH_1_PARAMETERS_PROGROUP_focusingsubsetcutoff	6
RESULTS_SEARCH_1_PARAMETERS_PROGROUP_intersection	1.3
RESULTS_SEARCH_1_PARAMETERS_PROGROUP_minimummatchconfidencecutoff	0.001
RESULTS_SEARCH_1_PARAMETERS_PROGROUP_minunusedprotscore	0.0458
RESULTS_SEARCH_1_PARAMETERS_PROGROUP_subsetcutoff	2
RESULTS_SEARCH_1_PARAMETERS_PROGROUP_uniprotservicehttpssupported	TRUE
RESULTS_SEARCH_1_PARAMETERS_PROGROUP_unusedprotscorethresholdforexcludingothersfromquant	1900-01-01 07:12:00
RESULTS_SEARCH_1_PARAMETERS_PEAKLIST_count	3728
RESULTS_SEARCH_1_PARAMETERS_PEAKLIST_filenumber	1
RESULTS_SEARCH_1_PARAMETERS_PEAKLIST_original_count	3728
RESULTS_SEARCH_1_PARAMETERS_PEAKLIST_originalfilename	C:\DATA\CC\GuoDanDan iTRAQ\??\sample1.wiff
RESULTS_SEARCH_1_PARAMETERS_PEAKLIST_partnumber	1
RESULTS_SEARCH_1_PARAMETERS_QUANT_TYPE_background_correction	FALSE
RESULTS_SEARCH_1_PARAMETERS_QUANT_TYPE_bias_correction	TRUE
RESULTS_SEARCH_1_PARAMETERS_QUANT_TYPE_data_type	MSMS
RESULTS_SEARCH_1_PARAMETERS_QUANT_TYPE_keep_extreme_peptides_over_fraction	0.15
RESULTS_SEARCH_1_PARAMETERS_QUANT_TYPE_low_confidence_check	TRUE
RESULTS_SEARCH_1_PARAMETERS_QUANT_TYPE_low_intensity_check	TRUE
RESULTS_SEARCH_1_PARAMETERS_QUANT_TYPE_median_statistic	FALSE
RESULTS_SEARCH_1_PARAMETERS_QUANT_TYPE_mod_check	TRUE
RESULTS_SEARCH_1_PARAMETERS_QUANT_TYPE_quant_threshold	-1
RESULTS_SEARCH_1_PARAMETERS_QUANT_TYPE_quant_threshold_sn	5
RESULTS_SEARCH_1_PARAMETERS_QUANT_TYPE_separate_searches	FALSE
RESULTS_SEARCH_1_PARAMETERS_QUANT_TYPE_shared_msms_check	TRUE
RESULTS_SEARCH_1_PARAMETERS_QUANT_TYPE_xml:id	iTRAQ8PLEX
RESULTS_SEARCH_1_PARAMETERS_QUANT_TYPE_QUANT_LABEL_display	113
RESULTS_SEARCH_1_PARAMETERS_QUANT_TYPE_QUANT_LABEL_name	IT113
RESULTS_SEARCH_1_PARAMETERS_QUANT_TYPE_QUANT_LABEL_used	TRUE
RESULTS_SEARCH_1_PARAMETERS_QUANT_TYPE_QUANT_LABEL_display	114
RESULTS_SEARCH_1_PARAMETERS_QUANT_TYPE_QUANT_LABEL_name	IT114
RESULTS_SEARCH_1_PARAMETERS_QUANT_TYPE_QUANT_LABEL_used	TRUE
RESULTS_SEARCH_1_PARAMETERS_QUANT_TYPE_QUANT_LABEL_display	1900-04-24
RESULTS_SEARCH_1_PARAMETERS_QUANT_TYPE_QUANT_LABEL_name	IT115
RESULTS_SEARCH_1_PARAMETERS_QUANT_TYPE_QUANT_LABEL_used	TRUE
RESULTS_SEARCH_1_PARAMETERS_QUANT_TYPE_QUANT_LABEL_display	116
RESULTS_SEARCH_1_PARAMETERS_QUANT_TYPE_QUANT_LABEL_name	IT116
RESULTS_SEARCH_1_PARAMETERS_QUANT_TYPE_QUANT_LABEL_used	TRUE
RESULTS_SEARCH_1_PARAMETERS_QUANT_TYPE_QUANT_LABEL_display	117
RESULTS_SEARCH_1_PARAMETERS_QUANT_TYPE_QUANT_LABEL_name	IT117
RESULTS_SEARCH_1_PARAMETERS_QUANT_TYPE_QUANT_LABEL_used	TRUE
RESULTS_SEARCH_1_PARAMETERS_QUANT_TYPE_QUANT_LABEL_display	118
RESULTS_SEARCH_1_PARAMETERS_QUANT_TYPE_QUANT_LABEL_name	IT118
RESULTS_SEARCH_1_PARAMETERS_QUANT_TYPE_QUANT_LABEL_used	TRUE
RESULTS_SEARCH_1_PARAMETERS_QUANT_TYPE_QUANT_LABEL_display	119
RESULTS_SEARCH_1_PARAMETERS_QUANT_TYPE_QUANT_LABEL_name	IT119
RESULTS_SEARCH_1_PARAMETERS_QUANT_TYPE_QUANT_LABEL_used	TRUE
RESULTS_SEARCH_1_PARAMETERS_QUANT_TYPE_QUANT_LABEL_display	121
RESULTS_SEARCH_1_PARAMETERS_QUANT_TYPE_QUANT_LABEL_name	IT121
RESULTS_SEARCH_1_PARAMETERS_QUANT_TYPE_QUANT_LABEL_used	TRUE
RESULTS_SEARCH_1_PARAMETERS_PARAGON_METHOD_SETTINGS_UI_SAMPLE_TYPE	iTRAQ 8plex (Peptide Labeled)
RESULTS_SEARCH_1_PARAMETERS_PARAGON_METHOD_SETTINGS_UI_CYS_ALKYLATION	Iodoacetamide
RESULTS_SEARCH_1_PARAMETERS_PARAGON_METHOD_SETTINGS_UI_DIGESTION	Trypsin
RESULTS_SEARCH_1_PARAMETERS_PARAGON_METHOD_SETTINGS_UI_INSTRUMENT	TripleTOF 5600
RESULTS_SEARCH_1_PARAMETERS_PARAGON_METHOD_SETTINGS_UI_SPECIES	Homo sapiens
RESULTS_SEARCH_1_PARAMETERS_PARAGON_METHOD_SETTINGS_UI_SEARCH_EFFORT	Thorough
RESULTS_SEARCH_1_PARAMETERS_PARAGON_METHOD_SETTINGS_UI_ID_FOCUS	Biological modifications
RESULTS_SEARCH_1_PARAMETERS_PARAGON_METHOD_SETTINGS_UI_USER_NAME	Omics-PC\Omics
RESULTS_SEARCH_1_PARAMETERS_PARAGON_METHOD_SETTINGS_UI_QUANT_TYPE	iTRAQ8PLEX
RESULTS_SEARCH_1_PARAMETERS_PARAGON_METHOD_SETTINGS_UI_MACHINE_NAME	OMICS-PC
RESULTS_SEARCH_1_PARAMETERS_PARAGON_METHOD_SETTINGS_UI_SEARCH_ID	6.37479e+17
RESULTS_SEARCH_1_PARAMETERS_PARAGON_METHOD_SETTINGS_UI_START_TIME	2021-02-02 19:26:30
RESULTS_SEARCH_1_PARAMETERS_PARAGON_METHOD_SETTINGS_UI_MIN_UNUSED_PROTSCORE	0.0458
RESULTS_SEARCH_1_PARAMETERS_PARAGON_METHOD_SETTINGS_QUANT_LABEL_SETTING_minus1	0
RESULTS_SEARCH_1_PARAMETERS_PARAGON_METHOD_SETTINGS_QUANT_LABEL_SETTING_minus2	0
RESULTS_SEARCH_1_PARAMETERS_PARAGON_METHOD_SETTINGS_QUANT_LABEL_SETTING_plus1	6.89
RESULTS_SEARCH_1_PARAMETERS_PARAGON_METHOD_SETTINGS_QUANT_LABEL_SETTING_plus2	0.24
RESULTS_SEARCH_1_PARAMETERS_PARAGON_METHOD_SETTINGS_QUANT_LABEL_SETTING_reagent	iTRAQ113
RESULTS_SEARCH_1_PARAMETERS_PARAGON_METHOD_SETTINGS_QUANT_LABEL_SETTING_type	Not Used
RESULTS_SEARCH_1_PARAMETERS_PARAGON_METHOD_SETTINGS_QUANT_LABEL_SETTING_minus1	0.94
RESULTS_SEARCH_1_PARAMETERS_PARAGON_METHOD_SETTINGS_QUANT_LABEL_SETTING_minus2	0
RESULTS_SEARCH_1_PARAMETERS_PARAGON_METHOD_SETTINGS_QUANT_LABEL_SETTING_plus1	5.9
RESULTS_SEARCH_1_PARAMETERS_PARAGON_METHOD_SETTINGS_QUANT_LABEL_SETTING_plus2	0.16
RESULTS_SEARCH_1_PARAMETERS_PARAGON_METHOD_SETTINGS_QUANT_LABEL_SETTING_reagent	iTRAQ114
RESULTS_SEARCH_1_PARAMETERS_PARAGON_METHOD_SETTINGS_QUANT_LABEL_SETTING_type	Not Used
RESULTS_SEARCH_1_PARAMETERS_PARAGON_METHOD_SETTINGS_QUANT_LABEL_SETTING_minus1	1.88
RESULTS_SEARCH_1_PARAMETERS_PARAGON_METHOD_SETTINGS_QUANT_LABEL_SETTING_minus2	0
RESULTS_SEARCH_1_PARAMETERS_PARAGON_METHOD_SETTINGS_QUANT_LABEL_SETTING_plus1	4.9
RESULTS_SEARCH_1_PARAMETERS_PARAGON_METHOD_SETTINGS_QUANT_LABEL_SETTING_plus2	02:24:00
RESULTS_SEARCH_1_PARAMETERS_PARAGON_METHOD_SETTINGS_QUANT_LABEL_SETTING_reagent	iTRAQ115
RESULTS_SEARCH_1_PARAMETERS_PARAGON_METHOD_SETTINGS_QUANT_LABEL_SETTING_type	Not Used
RESULTS_SEARCH_1_PARAMETERS_PARAGON_METHOD_SETTINGS_QUANT_LABEL_SETTING_minus1	2.82
RESULTS_SEARCH_1_PARAMETERS_PARAGON_METHOD_SETTINGS_QUANT_LABEL_SETTING_minus2	0
RESULTS_SEARCH_1_PARAMETERS_PARAGON_METHOD_SETTINGS_QUANT_LABEL_SETTING_plus1	3.9
RESULTS_SEARCH_1_PARAMETERS_PARAGON_METHOD_SETTINGS_QUANT_LABEL_SETTING_plus2	0.07
RESULTS_SEARCH_1_PARAMETERS_PARAGON_METHOD_SETTINGS_QUANT_LABEL_SETTING_reagent	iTRAQ116
RESULTS_SEARCH_1_PARAMETERS_PARAGON_METHOD_SETTINGS_QUANT_LABEL_SETTING_type	Not Used
RESULTS_SEARCH_1_PARAMETERS_PARAGON_METHOD_SETTINGS_QUANT_LABEL_SETTING_minus1	3.77
RESULTS_SEARCH_1_PARAMETERS_PARAGON_METHOD_SETTINGS_QUANT_LABEL_SETTING_minus2	0.06
RESULTS_SEARCH_1_PARAMETERS_PARAGON_METHOD_SETTINGS_QUANT_LABEL_SETTING_plus1	2.88
RESULTS_SEARCH_1_PARAMETERS_PARAGON_METHOD_SETTINGS_QUANT_LABEL_SETTING_plus2	0
RESULTS_SEARCH_1_PARAMETERS_PARAGON_METHOD_SETTINGS_QUANT_LABEL_SETTING_reagent	iTRAQ117
RESULTS_SEARCH_1_PARAMETERS_PARAGON_METHOD_SETTINGS_QUANT_LABEL_SETTING_type	Not Used
RESULTS_SEARCH_1_PARAMETERS_PARAGON_METHOD_SETTINGS_QUANT_LABEL_SETTING_minus1	4.71
RESULTS_SEARCH_1_PARAMETERS_PARAGON_METHOD_SETTINGS_QUANT_LABEL_SETTING_minus2	0.09
RESULTS_SEARCH_1_PARAMETERS_PARAGON_METHOD_SETTINGS_QUANT_LABEL_SETTING_plus1	1.91
RESULTS_SEARCH_1_PARAMETERS_PARAGON_METHOD_SETTINGS_QUANT_LABEL_SETTING_plus2	0
RESULTS_SEARCH_1_PARAMETERS_PARAGON_METHOD_SETTINGS_QUANT_LABEL_SETTING_reagent	iTRAQ118
RESULTS_SEARCH_1_PARAMETERS_PARAGON_METHOD_SETTINGS_QUANT_LABEL_SETTING_type	Not Used
RESULTS_SEARCH_1_PARAMETERS_PARAGON_METHOD_SETTINGS_QUANT_LABEL_SETTING_minus1	5.66
RESULTS_SEARCH_1_PARAMETERS_PARAGON_METHOD_SETTINGS_QUANT_LABEL_SETTING_minus2	0.14
RESULTS_SEARCH_1_PARAMETERS_PARAGON_METHOD_SETTINGS_QUANT_LABEL_SETTING_plus1	0.87
RESULTS_SEARCH_1_PARAMETERS_PARAGON_METHOD_SETTINGS_QUANT_LABEL_SETTING_plus2	0
RESULTS_SEARCH_1_PARAMETERS_PARAGON_METHOD_SETTINGS_QUANT_LABEL_SETTING_reagent	iTRAQ119
RESULTS_SEARCH_1_PARAMETERS_PARAGON_METHOD_SETTINGS_QUANT_LABEL_SETTING_type	Not Used
RESULTS_SEARCH_1_PARAMETERS_PARAGON_METHOD_SETTINGS_QUANT_LABEL_SETTING_minus1	7.44
RESULTS_SEARCH_1_PARAMETERS_PARAGON_METHOD_SETTINGS_QUANT_LABEL_SETTING_minus2	0.27
RESULTS_SEARCH_1_PARAMETERS_PARAGON_METHOD_SETTINGS_QUANT_LABEL_SETTING_plus1	0.18
RESULTS_SEARCH_1_PARAMETERS_PARAGON_METHOD_SETTINGS_QUANT_LABEL_SETTING_plus2	0
RESULTS_SEARCH_1_PARAMETERS_PARAGON_METHOD_SETTINGS_QUANT_LABEL_SETTING_reagent	iTRAQ121
RESULTS_SEARCH_1_PARAMETERS_PARAGON_METHOD_SETTINGS_QUANT_LABEL_SETTING_type	Not Used
RESULTS_SEARCH_1_PARAMETERS_PARAGON_METHOD_SETTINGS_UI_PSPEP	TRUE
RESULTS_SEARCH_2_time_cpu	637201
RESULTS_SEARCH_2_time_duration	639968
RESULTS_SEARCH_2_version	5.0.2.5174
RESULTS_SEARCH_2_xml:id	SEARCH:2:637478907898508600_0
RESULTS_SEARCH_2_PARAMETERS_chemical_data_edited	FALSE
RESULTS_SEARCH_2_PARAMETERS_do_multiprecursor_search	TRUE
RESULTS_SEARCH_2_PARAMETERS_do_reverse_search	TRUE
RESULTS_SEARCH_2_PARAMETERS_max_quant_labels	35
RESULTS_SEARCH_2_PARAMETERS_maxresults	15
RESULTS_SEARCH_2_PARAMETERS_separate_searches	FALSE
RESULTS_SEARCH_2_PARAMETERS_MSTOLERANCE_type	dalton
RESULTS_SEARCH_2_PARAMETERS_MSTOLERANCE_value	0.05
RESULTS_SEARCH_2_PARAMETERS_MSMSTOLERANCE_type	dalton
RESULTS_SEARCH_2_PARAMETERS_MSMSTOLERANCE_value	0.1
RESULTS_SEARCH_2_PARAMETERS_MS_STANDARD_DEVIATION_type	dalton
RESULTS_SEARCH_2_PARAMETERS_MS_STANDARD_DEVIATION_value	0.0011
RESULTS_SEARCH_2_PARAMETERS_MSMS_STANDARD_DEVIATION_type	dalton
RESULTS_SEARCH_2_PARAMETERS_MSMS_STANDARD_DEVIATION_value	0.01
RESULTS_SEARCH_2_PARAMETERS_FASTA_filename	C:\AB SCIEX\ProteinPilot Data\SearchDatabases\uniprot_Human_reviewed_20210202.fasta
RESULTS_SEARCH_2_PARAMETERS_AUTO_CALIBRATION_ms	TRUE
RESULTS_SEARCH_2_PARAMETERS_AUTO_CALIBRATION_msexport	FALSE
RESULTS_SEARCH_2_PARAMETERS_AUTO_CALIBRATION_msms	TRUE
RESULTS_SEARCH_2_PARAMETERS_AUTO_CALIBRATION_msmstolsdratio	2.75
RESULTS_SEARCH_2_PARAMETERS_AUTO_CALIBRATION_mstolsdratio	7
RESULTS_SEARCH_2_PARAMETERS_AUTO_CALIBRATION_squareroot	TRUE
RESULTS_SEARCH_2_PARAMETERS_AUTO_CALIBRATION_type	dalton
RESULTS_SEARCH_2_PARAMETERS_AUTO_CALIBRATION_MCP_d_s_s_f	0.0666667
RESULTS_SEARCH_2_PARAMETERS_AUTO_CALIBRATION_MCP_d_s_w_f	3
RESULTS_SEARCH_2_PARAMETERS_AUTO_CALIBRATION_MCP_m_f_r_mbc	200
RESULTS_SEARCH_2_PARAMETERS_AUTO_CALIBRATION_MCP_m_m_c	10
RESULTS_SEARCH_2_PARAMETERS_AUTO_CALIBRATION_MCP_m_m_f_s	0.25
RESULTS_SEARCH_2_PARAMETERS_AUTO_CALIBRATION_MCP_m_m_p_f	0.33
RESULTS_SEARCH_2_PARAMETERS_AUTO_CALIBRATION_MCP_m_m_p_rms_f	1
RESULTS_SEARCH_2_PARAMETERS_AUTO_CALIBRATION_MCP_m_p_t_f	1
RESULTS_SEARCH_2_PARAMETERS_AUTO_CALIBRATION_MCP_m_r_h_n_b	15
RESULTS_SEARCH_2_PARAMETERS_AUTO_CALIBRATION_MCP_m_z_n_s	99
RESULTS_SEARCH_2_PARAMETERS_AUTO_CALIBRATION_MCP_m_z_s_mn_f_r	0.0666667
RESULTS_SEARCH_2_PARAMETERS_AUTO_CALIBRATION_MCP_m_z_s_mx_f_r	0.1
RESULTS_SEARCH_2_PARAMETERS_MS_AUTO_CALIBRATION_OUT_avres	-1.79226e-08
RESULTS_SEARCH_2_PARAMETERS_MS_AUTO_CALIBRATION_OUT_c0	-0.000697596
RESULTS_SEARCH_2_PARAMETERS_MS_AUTO_CALIBRATION_OUT_c1minus1	2.7728e-05
RESULTS_SEARCH_2_PARAMETERS_MS_AUTO_CALIBRATION_OUT_c2	0
RESULTS_SEARCH_2_PARAMETERS_MS_AUTO_CALIBRATION_OUT_file	1
RESULTS_SEARCH_2_PARAMETERS_MS_AUTO_CALIBRATION_OUT_partnumber	1
RESULTS_SEARCH_2_PARAMETERS_MS_AUTO_CALIBRATION_OUT_polyorder	1
RESULTS_SEARCH_2_PARAMETERS_MS_AUTO_CALIBRATION_OUT_sample	1
RESULTS_SEARCH_2_PARAMETERS_MS_AUTO_CALIBRATION_OUT_squareroot	TRUE
RESULTS_SEARCH_2_PARAMETERS_MSMS_AUTO_CALIBRATION_OUT_avres	-1.31555e-07
RESULTS_SEARCH_2_PARAMETERS_MSMS_AUTO_CALIBRATION_OUT_c0	-0.000160778
RESULTS_SEARCH_2_PARAMETERS_MSMS_AUTO_CALIBRATION_OUT_c1minus1	8.35011e-06
RESULTS_SEARCH_2_PARAMETERS_MSMS_AUTO_CALIBRATION_OUT_c2	0
RESULTS_SEARCH_2_PARAMETERS_MSMS_AUTO_CALIBRATION_OUT_file	1
RESULTS_SEARCH_2_PARAMETERS_MSMS_AUTO_CALIBRATION_OUT_partnumber	1
RESULTS_SEARCH_2_PARAMETERS_MSMS_AUTO_CALIBRATION_OUT_polyorder	1
RESULTS_SEARCH_2_PARAMETERS_MSMS_AUTO_CALIBRATION_OUT_sample	1
RESULTS_SEARCH_2_PARAMETERS_MSMS_AUTO_CALIBRATION_OUT_squareroot	TRUE
RESULTS_SEARCH_2_PARAMETERS_MAX_PRECURSORS_FRAGLET	5
RESULTS_SEARCH_2_PARAMETERS_MAX_PRECURSORS_TAGLET	1
RESULTS_SEARCH_2_PARAMETERS_PRECURSORS_DR_FRAGLET	1900-01-10
RESULTS_SEARCH_2_PARAMETERS_PRECURSORS_DR_TAGLET	3
RESULTS_SEARCH_2_PARAMETERS_DEFAULT_CHARGE_STATE_1_charge	2
RESULTS_SEARCH_2_PARAMETERS_DEFAULT_CHARGE_STATE_1_probability	1
RESULTS_SEARCH_2_PARAMETERS_DEFAULT_CHARGE_STATE_2_charge	3
RESULTS_SEARCH_2_PARAMETERS_DEFAULT_CHARGE_STATE_2_probability	1
RESULTS_SEARCH_2_PARAMETERS_DEFAULT_CHARGE_STATE_3_charge	4
RESULTS_SEARCH_2_PARAMETERS_DEFAULT_CHARGE_STATE_3_probability	1
RESULTS_SEARCH_2_PARAMETERS_VERSION	5.0.2.0, 5346
RESULTS_SEARCH_2_PARAMETERS_PARAGON_VERSION	5.0.2.0, 5174
RESULTS_SEARCH_2_PARAMETERS_APPLICATION	ProteinPilot(tm) Software
RESULTS_SEARCH_2_PARAMETERS_PROGROUP_alternativedispositionmaximumfoldprobabilitydrop	100
RESULTS_SEARCH_2_PARAMETERS_PROGROUP_alternativedispositionmaximumfoldscoredrop	2
RESULTS_SEARCH_2_PARAMETERS_PROGROUP_autodiscordantpeptidethreshold	0.3
RESULTS_SEARCH_2_PARAMETERS_PROGROUP_bayesconfidencecalclulation	TRUE
RESULTS_SEARCH_2_PARAMETERS_PROGROUP_calibrateconfidence	TRUE
RESULTS_SEARCH_2_PARAMETERS_PROGROUP_compresspeptides	FALSE
RESULTS_SEARCH_2_PARAMETERS_PROGROUP_confidencepercentthresholdforexcludingothersfromquant	15
RESULTS_SEARCH_2_PARAMETERS_PROGROUP_confidencepercentthresholdforincludingselfinquant	15
RESULTS_SEARCH_2_PARAMETERS_PROGROUP_donotstoremspeaklists	FALSE
RESULTS_SEARCH_2_PARAMETERS_PROGROUP_fasta	C:\AB SCIEX\ProteinPilot Data\SearchDatabases\uniprot_Human_reviewed_20210202.fasta
RESULTS_SEARCH_2_PARAMETERS_PROGROUP_featuregroupminpepconf	0.66
RESULTS_SEARCH_2_PARAMETERS_PROGROUP_featuregroupminups	0.47
RESULTS_SEARCH_2_PARAMETERS_PROGROUP_focusingintersection	4
RESULTS_SEARCH_2_PARAMETERS_PROGROUP_focusingminimummatchconfidence	0.1
RESULTS_SEARCH_2_PARAMETERS_PROGROUP_focusingminunusedprotscore	0.1
RESULTS_SEARCH_2_PARAMETERS_PROGROUP_focusingsubsetcutoff	6
RESULTS_SEARCH_2_PARAMETERS_PROGROUP_intersection	1.3
RESULTS_SEARCH_2_PARAMETERS_PROGROUP_minimummatchconfidencecutoff	0.001
RESULTS_SEARCH_2_PARAMETERS_PROGROUP_minunusedprotscore	0.0458
RESULTS_SEARCH_2_PARAMETERS_PROGROUP_subsetcutoff	2
RESULTS_SEARCH_2_PARAMETERS_PROGROUP_uniprotservicehttpssupported	TRUE
RESULTS_SEARCH_2_PARAMETERS_PROGROUP_unusedprotscorethresholdforexcludingothersfromquant	1.3
RESULTS_SEARCH_2_PARAMETERS_PEAKLIST_count	3728
RESULTS_SEARCH_2_PARAMETERS_PEAKLIST_filenumber	1
RESULTS_SEARCH_2_PARAMETERS_PEAKLIST_original_count	3728
RESULTS_SEARCH_2_PARAMETERS_PEAKLIST_originalfilename	C:\DATA\CC\GuoDanDan iTRAQ\??\sample1.wiff
RESULTS_SEARCH_2_PARAMETERS_PEAKLIST_partnumber	1
RESULTS_SEARCH_2_PARAMETERS_QUANT_TYPE_background_correction	FALSE
RESULTS_SEARCH_2_PARAMETERS_QUANT_TYPE_bias_correction	TRUE
RESULTS_SEARCH_2_PARAMETERS_QUANT_TYPE_data_type	MSMS
RESULTS_SEARCH_2_PARAMETERS_QUANT_TYPE_keep_extreme_peptides_over_fraction	0.15
RESULTS_SEARCH_2_PARAMETERS_QUANT_TYPE_low_confidence_check	TRUE
RESULTS_SEARCH_2_PARAMETERS_QUANT_TYPE_low_intensity_check	TRUE
RESULTS_SEARCH_2_PARAMETERS_QUANT_TYPE_median_statistic	FALSE
RESULTS_SEARCH_2_PARAMETERS_QUANT_TYPE_mod_check	TRUE
RESULTS_SEARCH_2_PARAMETERS_QUANT_TYPE_quant_threshold	-1
RESULTS_SEARCH_2_PARAMETERS_QUANT_TYPE_quant_threshold_sn	5
RESULTS_SEARCH_2_PARAMETERS_QUANT_TYPE_separate_searches	FALSE
RESULTS_SEARCH_2_PARAMETERS_QUANT_TYPE_shared_msms_check	TRUE
RESULTS_SEARCH_2_PARAMETERS_QUANT_TYPE_xml:id	iTRAQ8PLEX
RESULTS_SEARCH_2_PARAMETERS_QUANT_TYPE_QUANT_LABEL_display	113
RESULTS_SEARCH_2_PARAMETERS_QUANT_TYPE_QUANT_LABEL_name	IT113
RESULTS_SEARCH_2_PARAMETERS_QUANT_TYPE_QUANT_LABEL_used	TRUE
RESULTS_SEARCH_2_PARAMETERS_QUANT_TYPE_QUANT_LABEL_display	114
RESULTS_SEARCH_2_PARAMETERS_QUANT_TYPE_QUANT_LABEL_name	IT114
RESULTS_SEARCH_2_PARAMETERS_QUANT_TYPE_QUANT_LABEL_used	TRUE
RESULTS_SEARCH_2_PARAMETERS_QUANT_TYPE_QUANT_LABEL_display	115
RESULTS_SEARCH_2_PARAMETERS_QUANT_TYPE_QUANT_LABEL_name	IT115
RESULTS_SEARCH_2_PARAMETERS_QUANT_TYPE_QUANT_LABEL_used	TRUE
RESULTS_SEARCH_2_PARAMETERS_QUANT_TYPE_QUANT_LABEL_display	116
RESULTS_SEARCH_2_PARAMETERS_QUANT_TYPE_QUANT_LABEL_name	IT116
RESULTS_SEARCH_2_PARAMETERS_QUANT_TYPE_QUANT_LABEL_used	TRUE
RESULTS_SEARCH_2_PARAMETERS_QUANT_TYPE_QUANT_LABEL_display	117
RESULTS_SEARCH_2_PARAMETERS_QUANT_TYPE_QUANT_LABEL_name	IT117
RESULTS_SEARCH_2_PARAMETERS_QUANT_TYPE_QUANT_LABEL_used	TRUE
RESULTS_SEARCH_2_PARAMETERS_QUANT_TYPE_QUANT_LABEL_display	118
RESULTS_SEARCH_2_PARAMETERS_QUANT_TYPE_QUANT_LABEL_name	IT118
RESULTS_SEARCH_2_PARAMETERS_QUANT_TYPE_QUANT_LABEL_used	TRUE
RESULTS_SEARCH_2_PARAMETERS_QUANT_TYPE_QUANT_LABEL_display	119
RESULTS_SEARCH_2_PARAMETERS_QUANT_TYPE_QUANT_LABEL_name	IT119
RESULTS_SEARCH_2_PARAMETERS_QUANT_TYPE_QUANT_LABEL_used	TRUE
RESULTS_SEARCH_2_PARAMETERS_QUANT_TYPE_QUANT_LABEL_display	1900-04-30
RESULTS_SEARCH_2_PARAMETERS_QUANT_TYPE_QUANT_LABEL_name	IT121
RESULTS_SEARCH_2_PARAMETERS_QUANT_TYPE_QUANT_LABEL_used	TRUE
RESULTS_SEARCH_2_PARAMETERS_PARAGON_METHOD_SETTINGS_UI_SAMPLE_TYPE	iTRAQ 8plex (Peptide Labeled)
RESULTS_SEARCH_2_PARAMETERS_PARAGON_METHOD_SETTINGS_UI_CYS_ALKYLATION	Iodoacetamide
RESULTS_SEARCH_2_PARAMETERS_PARAGON_METHOD_SETTINGS_UI_DIGESTION	Trypsin
RESULTS_SEARCH_2_PARAMETERS_PARAGON_METHOD_SETTINGS_UI_INSTRUMENT	TripleTOF 5600
RESULTS_SEARCH_2_PARAMETERS_PARAGON_METHOD_SETTINGS_UI_SPECIES	Homo sapiens
RESULTS_SEARCH_2_PARAMETERS_PARAGON_METHOD_SETTINGS_UI_SEARCH_EFFORT	Thorough
RESULTS_SEARCH_2_PARAMETERS_PARAGON_METHOD_SETTINGS_UI_ID_FOCUS	Biological modifications
RESULTS_SEARCH_2_PARAMETERS_PARAGON_METHOD_SETTINGS_UI_USER_NAME	Omics-PC\Omics
RESULTS_SEARCH_2_PARAMETERS_PARAGON_METHOD_SETTINGS_UI_QUANT_TYPE	iTRAQ8PLEX
RESULTS_SEARCH_2_PARAMETERS_PARAGON_METHOD_SETTINGS_UI_MACHINE_NAME	OMICS-PC
RESULTS_SEARCH_2_PARAMETERS_PARAGON_METHOD_SETTINGS_UI_SEARCH_ID	6.37479e+17
RESULTS_SEARCH_2_PARAMETERS_PARAGON_METHOD_SETTINGS_UI_START_TIME	2021-02-02 19:26:30
RESULTS_SEARCH_2_PARAMETERS_PARAGON_METHOD_SETTINGS_UI_MIN_UNUSED_PROTSCORE	0.0458
RESULTS_SEARCH_2_PARAMETERS_PARAGON_METHOD_SETTINGS_QUANT_LABEL_SETTING_minus1	0
RESULTS_SEARCH_2_PARAMETERS_PARAGON_METHOD_SETTINGS_QUANT_LABEL_SETTING_minus2	0
RESULTS_SEARCH_2_PARAMETERS_PARAGON_METHOD_SETTINGS_QUANT_LABEL_SETTING_plus1	6.89
RESULTS_SEARCH_2_PARAMETERS_PARAGON_METHOD_SETTINGS_QUANT_LABEL_SETTING_plus2	0.24
RESULTS_SEARCH_2_PARAMETERS_PARAGON_METHOD_SETTINGS_QUANT_LABEL_SETTING_reagent	iTRAQ113
RESULTS_SEARCH_2_PARAMETERS_PARAGON_METHOD_SETTINGS_QUANT_LABEL_SETTING_type	Not Used
RESULTS_SEARCH_2_PARAMETERS_PARAGON_METHOD_SETTINGS_QUANT_LABEL_SETTING_minus1	0.94
RESULTS_SEARCH_2_PARAMETERS_PARAGON_METHOD_SETTINGS_QUANT_LABEL_SETTING_minus2	00:00:00
RESULTS_SEARCH_2_PARAMETERS_PARAGON_METHOD_SETTINGS_QUANT_LABEL_SETTING_plus1	5.9
RESULTS_SEARCH_2_PARAMETERS_PARAGON_METHOD_SETTINGS_QUANT_LABEL_SETTING_plus2	0.16
RESULTS_SEARCH_2_PARAMETERS_PARAGON_METHOD_SETTINGS_QUANT_LABEL_SETTING_reagent	iTRAQ114
RESULTS_SEARCH_2_PARAMETERS_PARAGON_METHOD_SETTINGS_QUANT_LABEL_SETTING_type	Not Used
RESULTS_SEARCH_2_PARAMETERS_PARAGON_METHOD_SETTINGS_QUANT_LABEL_SETTING_minus1	1.88
RESULTS_SEARCH_2_PARAMETERS_PARAGON_METHOD_SETTINGS_QUANT_LABEL_SETTING_minus2	0
RESULTS_SEARCH_2_PARAMETERS_PARAGON_METHOD_SETTINGS_QUANT_LABEL_SETTING_plus1	4.9
RESULTS_SEARCH_2_PARAMETERS_PARAGON_METHOD_SETTINGS_QUANT_LABEL_SETTING_plus2	0.1
RESULTS_SEARCH_2_PARAMETERS_PARAGON_METHOD_SETTINGS_QUANT_LABEL_SETTING_reagent	iTRAQ115
RESULTS_SEARCH_2_PARAMETERS_PARAGON_METHOD_SETTINGS_QUANT_LABEL_SETTING_type	Not Used
RESULTS_SEARCH_2_PARAMETERS_PARAGON_METHOD_SETTINGS_QUANT_LABEL_SETTING_minus1	2.82
RESULTS_SEARCH_2_PARAMETERS_PARAGON_METHOD_SETTINGS_QUANT_LABEL_SETTING_minus2	0
RESULTS_SEARCH_2_PARAMETERS_PARAGON_METHOD_SETTINGS_QUANT_LABEL_SETTING_plus1	3.9
RESULTS_SEARCH_2_PARAMETERS_PARAGON_METHOD_SETTINGS_QUANT_LABEL_SETTING_plus2	0.07
RESULTS_SEARCH_2_PARAMETERS_PARAGON_METHOD_SETTINGS_QUANT_LABEL_SETTING_reagent	iTRAQ116
RESULTS_SEARCH_2_PARAMETERS_PARAGON_METHOD_SETTINGS_QUANT_LABEL_SETTING_type	Not Used
RESULTS_SEARCH_2_PARAMETERS_PARAGON_METHOD_SETTINGS_QUANT_LABEL_SETTING_minus1	3.77
RESULTS_SEARCH_2_PARAMETERS_PARAGON_METHOD_SETTINGS_QUANT_LABEL_SETTING_minus2	0.06
RESULTS_SEARCH_2_PARAMETERS_PARAGON_METHOD_SETTINGS_QUANT_LABEL_SETTING_plus1	2.88
RESULTS_SEARCH_2_PARAMETERS_PARAGON_METHOD_SETTINGS_QUANT_LABEL_SETTING_plus2	0
RESULTS_SEARCH_2_PARAMETERS_PARAGON_METHOD_SETTINGS_QUANT_LABEL_SETTING_reagent	iTRAQ117
RESULTS_SEARCH_2_PARAMETERS_PARAGON_METHOD_SETTINGS_QUANT_LABEL_SETTING_type	Not Used
RESULTS_SEARCH_2_PARAMETERS_PARAGON_METHOD_SETTINGS_QUANT_LABEL_SETTING_minus1	4.71
RESULTS_SEARCH_2_PARAMETERS_PARAGON_METHOD_SETTINGS_QUANT_LABEL_SETTING_minus2	0.09
RESULTS_SEARCH_2_PARAMETERS_PARAGON_METHOD_SETTINGS_QUANT_LABEL_SETTING_plus1	1.91
RESULTS_SEARCH_2_PARAMETERS_PARAGON_METHOD_SETTINGS_QUANT_LABEL_SETTING_plus2	0
RESULTS_SEARCH_2_PARAMETERS_PARAGON_METHOD_SETTINGS_QUANT_LABEL_SETTING_reagent	iTRAQ118
RESULTS_SEARCH_2_PARAMETERS_PARAGON_METHOD_SETTINGS_QUANT_LABEL_SETTING_type	Not Used
RESULTS_SEARCH_2_PARAMETERS_PARAGON_METHOD_SETTINGS_QUANT_LABEL_SETTING_minus1	5.66
RESULTS_SEARCH_2_PARAMETERS_PARAGON_METHOD_SETTINGS_QUANT_LABEL_SETTING_minus2	0.14
RESULTS_SEARCH_2_PARAMETERS_PARAGON_METHOD_SETTINGS_QUANT_LABEL_SETTING_plus1	0.87
RESULTS_SEARCH_2_PARAMETERS_PARAGON_METHOD_SETTINGS_QUANT_LABEL_SETTING_plus2	0
RESULTS_SEARCH_2_PARAMETERS_PARAGON_METHOD_SETTINGS_QUANT_LABEL_SETTING_reagent	iTRAQ119
RESULTS_SEARCH_2_PARAMETERS_PARAGON_METHOD_SETTINGS_QUANT_LABEL_SETTING_type	Not Used
RESULTS_SEARCH_2_PARAMETERS_PARAGON_METHOD_SETTINGS_QUANT_LABEL_SETTING_minus1	7.44
RESULTS_SEARCH_2_PARAMETERS_PARAGON_METHOD_SETTINGS_QUANT_LABEL_SETTING_minus2	0.27
RESULTS_SEARCH_2_PARAMETERS_PARAGON_METHOD_SETTINGS_QUANT_LABEL_SETTING_plus1	0.18
RESULTS_SEARCH_2_PARAMETERS_PARAGON_METHOD_SETTINGS_QUANT_LABEL_SETTING_plus2	0
RESULTS_SEARCH_2_PARAMETERS_PARAGON_METHOD_SETTINGS_QUANT_LABEL_SETTING_reagent	iTRAQ121
RESULTS_SEARCH_2_PARAMETERS_PARAGON_METHOD_SETTINGS_QUANT_LABEL_SETTING_type	Not Used
RESULTS_SEARCH_2_PARAMETERS_PARAGON_METHOD_SETTINGS_UI_PSPEP	TRUE
RESULTS_SEARCH_3_time_cpu	68546
RESULTS_SEARCH_3_time_duration	68598
RESULTS_SEARCH_3_version	5.0.2.5174
RESULTS_SEARCH_3_xml:id	SEARCH:1:637478907898508600_1
RESULTS_SEARCH_3_PARAMETERS_chemical_data_edited	FALSE
RESULTS_SEARCH_3_PARAMETERS_do_multiprecursor_search	TRUE
RESULTS_SEARCH_3_PARAMETERS_do_reverse_search	TRUE
RESULTS_SEARCH_3_PARAMETERS_max_quant_labels	35
RESULTS_SEARCH_3_PARAMETERS_maxresults	15
RESULTS_SEARCH_3_PARAMETERS_separate_searches	FALSE
RESULTS_SEARCH_3_PARAMETERS_MSTOLERANCE_type	dalton
RESULTS_SEARCH_3_PARAMETERS_MSTOLERANCE_value	0.05
RESULTS_SEARCH_3_PARAMETERS_MSMSTOLERANCE_type	dalton
RESULTS_SEARCH_3_PARAMETERS_MSMSTOLERANCE_value	0.1
RESULTS_SEARCH_3_PARAMETERS_MS_STANDARD_DEVIATION_type	dalton
RESULTS_SEARCH_3_PARAMETERS_MS_STANDARD_DEVIATION_value	0.0011
RESULTS_SEARCH_3_PARAMETERS_MSMS_STANDARD_DEVIATION_type	dalton
RESULTS_SEARCH_3_PARAMETERS_MSMS_STANDARD_DEVIATION_value	0.01
RESULTS_SEARCH_3_PARAMETERS_FASTA_filename	C:\AB SCIEX\ProteinPilot Data\SearchDatabases\uniprot_Human_reviewed_20210202.fasta
RESULTS_SEARCH_3_PARAMETERS_AUTO_CALIBRATION_ms	TRUE
RESULTS_SEARCH_3_PARAMETERS_AUTO_CALIBRATION_msexport	FALSE
RESULTS_SEARCH_3_PARAMETERS_AUTO_CALIBRATION_msms	TRUE
RESULTS_SEARCH_3_PARAMETERS_AUTO_CALIBRATION_msmstolsdratio	2.75
RESULTS_SEARCH_3_PARAMETERS_AUTO_CALIBRATION_mstolsdratio	7
RESULTS_SEARCH_3_PARAMETERS_AUTO_CALIBRATION_squareroot	TRUE
RESULTS_SEARCH_3_PARAMETERS_AUTO_CALIBRATION_type	dalton
RESULTS_SEARCH_3_PARAMETERS_AUTO_CALIBRATION_MCP_d_s_s_f	0.0666667
RESULTS_SEARCH_3_PARAMETERS_AUTO_CALIBRATION_MCP_d_s_w_f	3
RESULTS_SEARCH_3_PARAMETERS_AUTO_CALIBRATION_MCP_m_f_r_mbc	200
RESULTS_SEARCH_3_PARAMETERS_AUTO_CALIBRATION_MCP_m_m_c	10
RESULTS_SEARCH_3_PARAMETERS_AUTO_CALIBRATION_MCP_m_m_f_s	0.25
RESULTS_SEARCH_3_PARAMETERS_AUTO_CALIBRATION_MCP_m_m_p_f	0.33
RESULTS_SEARCH_3_PARAMETERS_AUTO_CALIBRATION_MCP_m_m_p_rms_f	1
RESULTS_SEARCH_3_PARAMETERS_AUTO_CALIBRATION_MCP_m_p_t_f	1
RESULTS_SEARCH_3_PARAMETERS_AUTO_CALIBRATION_MCP_m_r_h_n_b	15
RESULTS_SEARCH_3_PARAMETERS_AUTO_CALIBRATION_MCP_m_z_n_s	99
RESULTS_SEARCH_3_PARAMETERS_AUTO_CALIBRATION_MCP_m_z_s_mn_f_r	0.0666667
RESULTS_SEARCH_3_PARAMETERS_AUTO_CALIBRATION_MCP_m_z_s_mx_f_r	0.1
RESULTS_SEARCH_3_PARAMETERS_MS_AUTO_CALIBRATION_OUT_avres	7.50918e-08
RESULTS_SEARCH_3_PARAMETERS_MS_AUTO_CALIBRATION_OUT_c0	-0.000507388
RESULTS_SEARCH_3_PARAMETERS_MS_AUTO_CALIBRATION_OUT_c1minus1	2.1034e-05
RESULTS_SEARCH_3_PARAMETERS_MS_AUTO_CALIBRATION_OUT_c2	0
RESULTS_SEARCH_3_PARAMETERS_MS_AUTO_CALIBRATION_OUT_file	1
RESULTS_SEARCH_3_PARAMETERS_MS_AUTO_CALIBRATION_OUT_partnumber	2
RESULTS_SEARCH_3_PARAMETERS_MS_AUTO_CALIBRATION_OUT_polyorder	1
RESULTS_SEARCH_3_PARAMETERS_MS_AUTO_CALIBRATION_OUT_sample	1
RESULTS_SEARCH_3_PARAMETERS_MS_AUTO_CALIBRATION_OUT_squareroot	TRUE
RESULTS_SEARCH_3_PARAMETERS_MSMS_AUTO_CALIBRATION_OUT_avres	-2.31432e-07
RESULTS_SEARCH_3_PARAMETERS_MSMS_AUTO_CALIBRATION_OUT_c0	-0.000153244
RESULTS_SEARCH_3_PARAMETERS_MSMS_AUTO_CALIBRATION_OUT_c1minus1	7.74473e-06
RESULTS_SEARCH_3_PARAMETERS_MSMS_AUTO_CALIBRATION_OUT_c2	0
RESULTS_SEARCH_3_PARAMETERS_MSMS_AUTO_CALIBRATION_OUT_file	1
RESULTS_SEARCH_3_PARAMETERS_MSMS_AUTO_CALIBRATION_OUT_partnumber	2
RESULTS_SEARCH_3_PARAMETERS_MSMS_AUTO_CALIBRATION_OUT_polyorder	1
RESULTS_SEARCH_3_PARAMETERS_MSMS_AUTO_CALIBRATION_OUT_sample	1
RESULTS_SEARCH_3_PARAMETERS_MSMS_AUTO_CALIBRATION_OUT_squareroot	TRUE
RESULTS_SEARCH_3_PARAMETERS_MAX_PRECURSORS_FRAGLET	5
RESULTS_SEARCH_3_PARAMETERS_MAX_PRECURSORS_TAGLET	1
RESULTS_SEARCH_3_PARAMETERS_PRECURSORS_DR_FRAGLET	10
RESULTS_SEARCH_3_PARAMETERS_PRECURSORS_DR_TAGLET	3
RESULTS_SEARCH_3_PARAMETERS_DEFAULT_CHARGE_STATE_1_charge	2
RESULTS_SEARCH_3_PARAMETERS_DEFAULT_CHARGE_STATE_1_probability	1
RESULTS_SEARCH_3_PARAMETERS_DEFAULT_CHARGE_STATE_2_charge	3
RESULTS_SEARCH_3_PARAMETERS_DEFAULT_CHARGE_STATE_2_probability	1
RESULTS_SEARCH_3_PARAMETERS_DEFAULT_CHARGE_STATE_3_charge	4
RESULTS_SEARCH_3_PARAMETERS_DEFAULT_CHARGE_STATE_3_probability	1
RESULTS_SEARCH_3_PARAMETERS_VERSION	5.0.2.0, 5346
RESULTS_SEARCH_3_PARAMETERS_PARAGON_VERSION	5.0.2.0, 5174
RESULTS_SEARCH_3_PARAMETERS_APPLICATION	ProteinPilot(tm) Software
RESULTS_SEARCH_3_PARAMETERS_PROGROUP_alternativedispositionmaximumfoldprobabilitydrop	100
RESULTS_SEARCH_3_PARAMETERS_PROGROUP_alternativedispositionmaximumfoldscoredrop	2
RESULTS_SEARCH_3_PARAMETERS_PROGROUP_autodiscordantpeptidethreshold	07:12:00
RESULTS_SEARCH_3_PARAMETERS_PROGROUP_bayesconfidencecalclulation	TRUE
RESULTS_SEARCH_3_PARAMETERS_PROGROUP_calibrateconfidence	TRUE
RESULTS_SEARCH_3_PARAMETERS_PROGROUP_compresspeptides	FALSE
RESULTS_SEARCH_3_PARAMETERS_PROGROUP_confidencepercentthresholdforexcludingothersfromquant	1900-01-15
RESULTS_SEARCH_3_PARAMETERS_PROGROUP_confidencepercentthresholdforincludingselfinquant	15
RESULTS_SEARCH_3_PARAMETERS_PROGROUP_donotstoremspeaklists	FALSE
RESULTS_SEARCH_3_PARAMETERS_PROGROUP_fasta	C:\AB SCIEX\ProteinPilot Data\SearchDatabases\uniprot_Human_reviewed_20210202.fasta
RESULTS_SEARCH_3_PARAMETERS_PROGROUP_featuregroupminpepconf	0.66
RESULTS_SEARCH_3_PARAMETERS_PROGROUP_featuregroupminups	0.47
RESULTS_SEARCH_3_PARAMETERS_PROGROUP_focusingintersection	4
RESULTS_SEARCH_3_PARAMETERS_PROGROUP_focusingminimummatchconfidence	0.1
RESULTS_SEARCH_3_PARAMETERS_PROGROUP_focusingminunusedprotscore	02:24:00
RESULTS_SEARCH_3_PARAMETERS_PROGROUP_focusingsubsetcutoff	6
RESULTS_SEARCH_3_PARAMETERS_PROGROUP_intersection	1.3
RESULTS_SEARCH_3_PARAMETERS_PROGROUP_minimummatchconfidencecutoff	0.001
RESULTS_SEARCH_3_PARAMETERS_PROGROUP_minunusedprotscore	01:05:57.120000
RESULTS_SEARCH_3_PARAMETERS_PROGROUP_subsetcutoff	2
RESULTS_SEARCH_3_PARAMETERS_PROGROUP_uniprotservicehttpssupported	TRUE
RESULTS_SEARCH_3_PARAMETERS_PROGROUP_unusedprotscorethresholdforexcludingothersfromquant	1.3
RESULTS_SEARCH_3_PARAMETERS_PEAKLIST_count	3730
RESULTS_SEARCH_3_PARAMETERS_PEAKLIST_filenumber	1
RESULTS_SEARCH_3_PARAMETERS_PEAKLIST_original_count	3730
RESULTS_SEARCH_3_PARAMETERS_PEAKLIST_originalfilename	C:\DATA\CC\GuoDanDan iTRAQ\??\sample1.wiff
RESULTS_SEARCH_3_PARAMETERS_PEAKLIST_partnumber	2
RESULTS_SEARCH_3_PARAMETERS_QUANT_TYPE_background_correction	FALSE
RESULTS_SEARCH_3_PARAMETERS_QUANT_TYPE_bias_correction	TRUE
RESULTS_SEARCH_3_PARAMETERS_QUANT_TYPE_data_type	MSMS
RESULTS_SEARCH_3_PARAMETERS_QUANT_TYPE_keep_extreme_peptides_over_fraction	03:36:00
RESULTS_SEARCH_3_PARAMETERS_QUANT_TYPE_low_confidence_check	TRUE
RESULTS_SEARCH_3_PARAMETERS_QUANT_TYPE_low_intensity_check	TRUE
RESULTS_SEARCH_3_PARAMETERS_QUANT_TYPE_median_statistic	FALSE
RESULTS_SEARCH_3_PARAMETERS_QUANT_TYPE_mod_check	TRUE
RESULTS_SEARCH_3_PARAMETERS_QUANT_TYPE_quant_threshold	-1
RESULTS_SEARCH_3_PARAMETERS_QUANT_TYPE_quant_threshold_sn	5
RESULTS_SEARCH_3_PARAMETERS_QUANT_TYPE_separate_searches	FALSE
RESULTS_SEARCH_3_PARAMETERS_QUANT_TYPE_shared_msms_check	TRUE
RESULTS_SEARCH_3_PARAMETERS_QUANT_TYPE_xml:id	iTRAQ8PLEX
RESULTS_SEARCH_3_PARAMETERS_QUANT_TYPE_QUANT_LABEL_display	113
RESULTS_SEARCH_3_PARAMETERS_QUANT_TYPE_QUANT_LABEL_name	IT113
RESULTS_SEARCH_3_PARAMETERS_QUANT_TYPE_QUANT_LABEL_used	TRUE
RESULTS_SEARCH_3_PARAMETERS_QUANT_TYPE_QUANT_LABEL_display	114
RESULTS_SEARCH_3_PARAMETERS_QUANT_TYPE_QUANT_LABEL_name	IT114
RESULTS_SEARCH_3_PARAMETERS_QUANT_TYPE_QUANT_LABEL_used	TRUE
RESULTS_SEARCH_3_PARAMETERS_QUANT_TYPE_QUANT_LABEL_display	115
RESULTS_SEARCH_3_PARAMETERS_QUANT_TYPE_QUANT_LABEL_name	IT115
RESULTS_SEARCH_3_PARAMETERS_QUANT_TYPE_QUANT_LABEL_used	TRUE
RESULTS_SEARCH_3_PARAMETERS_QUANT_TYPE_QUANT_LABEL_display	116
RESULTS_SEARCH_3_PARAMETERS_QUANT_TYPE_QUANT_LABEL_name	IT116
RESULTS_SEARCH_3_PARAMETERS_QUANT_TYPE_QUANT_LABEL_used	TRUE
RESULTS_SEARCH_3_PARAMETERS_QUANT_TYPE_QUANT_LABEL_display	117
RESULTS_SEARCH_3_PARAMETERS_QUANT_TYPE_QUANT_LABEL_name	IT117
RESULTS_SEARCH_3_PARAMETERS_QUANT_TYPE_QUANT_LABEL_used	TRUE
RESULTS_SEARCH_3_PARAMETERS_QUANT_TYPE_QUANT_LABEL_display	118
RESULTS_SEARCH_3_PARAMETERS_QUANT_TYPE_QUANT_LABEL_name	IT118
RESULTS_SEARCH_3_PARAMETERS_QUANT_TYPE_QUANT_LABEL_used	TRUE
RESULTS_SEARCH_3_PARAMETERS_QUANT_TYPE_QUANT_LABEL_display	119
RESULTS_SEARCH_3_PARAMETERS_QUANT_TYPE_QUANT_LABEL_name	IT119
RESULTS_SEARCH_3_PARAMETERS_QUANT_TYPE_QUANT_LABEL_used	TRUE
RESULTS_SEARCH_3_PARAMETERS_QUANT_TYPE_QUANT_LABEL_display	121
RESULTS_SEARCH_3_PARAMETERS_QUANT_TYPE_QUANT_LABEL_name	IT121
RESULTS_SEARCH_3_PARAMETERS_QUANT_TYPE_QUANT_LABEL_used	TRUE
RESULTS_SEARCH_3_PARAMETERS_PARAGON_METHOD_SETTINGS_UI_SAMPLE_TYPE	iTRAQ 8plex (Peptide Labeled)
RESULTS_SEARCH_3_PARAMETERS_PARAGON_METHOD_SETTINGS_UI_CYS_ALKYLATION	Iodoacetamide
RESULTS_SEARCH_3_PARAMETERS_PARAGON_METHOD_SETTINGS_UI_DIGESTION	Trypsin
RESULTS_SEARCH_3_PARAMETERS_PARAGON_METHOD_SETTINGS_UI_INSTRUMENT	TripleTOF 5600
RESULTS_SEARCH_3_PARAMETERS_PARAGON_METHOD_SETTINGS_UI_SPECIES	Homo sapiens
RESULTS_SEARCH_3_PARAMETERS_PARAGON_METHOD_SETTINGS_UI_SEARCH_EFFORT	Thorough
RESULTS_SEARCH_3_PARAMETERS_PARAGON_METHOD_SETTINGS_UI_ID_FOCUS	Biological modifications
RESULTS_SEARCH_3_PARAMETERS_PARAGON_METHOD_SETTINGS_UI_USER_NAME	Omics-PC\Omics
RESULTS_SEARCH_3_PARAMETERS_PARAGON_METHOD_SETTINGS_UI_QUANT_TYPE	iTRAQ8PLEX
RESULTS_SEARCH_3_PARAMETERS_PARAGON_METHOD_SETTINGS_UI_MACHINE_NAME	OMICS-PC
RESULTS_SEARCH_3_PARAMETERS_PARAGON_METHOD_SETTINGS_UI_SEARCH_ID	6.37479e+17
RESULTS_SEARCH_3_PARAMETERS_PARAGON_METHOD_SETTINGS_UI_START_TIME	2021-02-02 19:26:30
RESULTS_SEARCH_3_PARAMETERS_PARAGON_METHOD_SETTINGS_UI_MIN_UNUSED_PROTSCORE	0.0458
RESULTS_SEARCH_3_PARAMETERS_PARAGON_METHOD_SETTINGS_QUANT_LABEL_SETTING_minus1	0
RESULTS_SEARCH_3_PARAMETERS_PARAGON_METHOD_SETTINGS_QUANT_LABEL_SETTING_minus2	0
RESULTS_SEARCH_3_PARAMETERS_PARAGON_METHOD_SETTINGS_QUANT_LABEL_SETTING_plus1	6.89
RESULTS_SEARCH_3_PARAMETERS_PARAGON_METHOD_SETTINGS_QUANT_LABEL_SETTING_plus2	0.24
RESULTS_SEARCH_3_PARAMETERS_PARAGON_METHOD_SETTINGS_QUANT_LABEL_SETTING_reagent	iTRAQ113
RESULTS_SEARCH_3_PARAMETERS_PARAGON_METHOD_SETTINGS_QUANT_LABEL_SETTING_type	Not Used
RESULTS_SEARCH_3_PARAMETERS_PARAGON_METHOD_SETTINGS_QUANT_LABEL_SETTING_minus1	0.94
RESULTS_SEARCH_3_PARAMETERS_PARAGON_METHOD_SETTINGS_QUANT_LABEL_SETTING_minus2	0
RESULTS_SEARCH_3_PARAMETERS_PARAGON_METHOD_SETTINGS_QUANT_LABEL_SETTING_plus1	5.9
RESULTS_SEARCH_3_PARAMETERS_PARAGON_METHOD_SETTINGS_QUANT_LABEL_SETTING_plus2	0.16
RESULTS_SEARCH_3_PARAMETERS_PARAGON_METHOD_SETTINGS_QUANT_LABEL_SETTING_reagent	iTRAQ114
RESULTS_SEARCH_3_PARAMETERS_PARAGON_METHOD_SETTINGS_QUANT_LABEL_SETTING_type	Not Used
RESULTS_SEARCH_3_PARAMETERS_PARAGON_METHOD_SETTINGS_QUANT_LABEL_SETTING_minus1	1.88
RESULTS_SEARCH_3_PARAMETERS_PARAGON_METHOD_SETTINGS_QUANT_LABEL_SETTING_minus2	0
RESULTS_SEARCH_3_PARAMETERS_PARAGON_METHOD_SETTINGS_QUANT_LABEL_SETTING_plus1	4.9
RESULTS_SEARCH_3_PARAMETERS_PARAGON_METHOD_SETTINGS_QUANT_LABEL_SETTING_plus2	0.1
RESULTS_SEARCH_3_PARAMETERS_PARAGON_METHOD_SETTINGS_QUANT_LABEL_SETTING_reagent	iTRAQ115
RESULTS_SEARCH_3_PARAMETERS_PARAGON_METHOD_SETTINGS_QUANT_LABEL_SETTING_type	Not Used
RESULTS_SEARCH_3_PARAMETERS_PARAGON_METHOD_SETTINGS_QUANT_LABEL_SETTING_minus1	2.82
RESULTS_SEARCH_3_PARAMETERS_PARAGON_METHOD_SETTINGS_QUANT_LABEL_SETTING_minus2	0
RESULTS_SEARCH_3_PARAMETERS_PARAGON_METHOD_SETTINGS_QUANT_LABEL_SETTING_plus1	3.9
RESULTS_SEARCH_3_PARAMETERS_PARAGON_METHOD_SETTINGS_QUANT_LABEL_SETTING_plus2	0.07
RESULTS_SEARCH_3_PARAMETERS_PARAGON_METHOD_SETTINGS_QUANT_LABEL_SETTING_reagent	iTRAQ116
RESULTS_SEARCH_3_PARAMETERS_PARAGON_METHOD_SETTINGS_QUANT_LABEL_SETTING_type	Not Used
RESULTS_SEARCH_3_PARAMETERS_PARAGON_METHOD_SETTINGS_QUANT_LABEL_SETTING_minus1	3.77
RESULTS_SEARCH_3_PARAMETERS_PARAGON_METHOD_SETTINGS_QUANT_LABEL_SETTING_minus2	0.06
RESULTS_SEARCH_3_PARAMETERS_PARAGON_METHOD_SETTINGS_QUANT_LABEL_SETTING_plus1	2.88
RESULTS_SEARCH_3_PARAMETERS_PARAGON_METHOD_SETTINGS_QUANT_LABEL_SETTING_plus2	0
RESULTS_SEARCH_3_PARAMETERS_PARAGON_METHOD_SETTINGS_QUANT_LABEL_SETTING_reagent	iTRAQ117
RESULTS_SEARCH_3_PARAMETERS_PARAGON_METHOD_SETTINGS_QUANT_LABEL_SETTING_type	Not Used
RESULTS_SEARCH_3_PARAMETERS_PARAGON_METHOD_SETTINGS_QUANT_LABEL_SETTING_minus1	4.71
RESULTS_SEARCH_3_PARAMETERS_PARAGON_METHOD_SETTINGS_QUANT_LABEL_SETTING_minus2	0.09
RESULTS_SEARCH_3_PARAMETERS_PARAGON_METHOD_SETTINGS_QUANT_LABEL_SETTING_plus1	1.91
RESULTS_SEARCH_3_PARAMETERS_PARAGON_METHOD_SETTINGS_QUANT_LABEL_SETTING_plus2	0
RESULTS_SEARCH_3_PARAMETERS_PARAGON_METHOD_SETTINGS_QUANT_LABEL_SETTING_reagent	iTRAQ118
RESULTS_SEARCH_3_PARAMETERS_PARAGON_METHOD_SETTINGS_QUANT_LABEL_SETTING_type	Not Used
RESULTS_SEARCH_3_PARAMETERS_PARAGON_METHOD_SETTINGS_QUANT_LABEL_SETTING_minus1	5.66
RESULTS_SEARCH_3_PARAMETERS_PARAGON_METHOD_SETTINGS_QUANT_LABEL_SETTING_minus2	0.14
RESULTS_SEARCH_3_PARAMETERS_PARAGON_METHOD_SETTINGS_QUANT_LABEL_SETTING_plus1	0.87
RESULTS_SEARCH_3_PARAMETERS_PARAGON_METHOD_SETTINGS_QUANT_LABEL_SETTING_plus2	0
RESULTS_SEARCH_3_PARAMETERS_PARAGON_METHOD_SETTINGS_QUANT_LABEL_SETTING_reagent	iTRAQ119
RESULTS_SEARCH_3_PARAMETERS_PARAGON_METHOD_SETTINGS_QUANT_LABEL_SETTING_type	Not Used
RESULTS_SEARCH_3_PARAMETERS_PARAGON_METHOD_SETTINGS_QUANT_LABEL_SETTING_minus1	7.44
RESULTS_SEARCH_3_PARAMETERS_PARAGON_METHOD_SETTINGS_QUANT_LABEL_SETTING_minus2	0.27
RESULTS_SEARCH_3_PARAMETERS_PARAGON_METHOD_SETTINGS_QUANT_LABEL_SETTING_plus1	0.18
RESULTS_SEARCH_3_PARAMETERS_PARAGON_METHOD_SETTINGS_QUANT_LABEL_SETTING_plus2	0
RESULTS_SEARCH_3_PARAMETERS_PARAGON_METHOD_SETTINGS_QUANT_LABEL_SETTING_reagent	iTRAQ121
RESULTS_SEARCH_3_PARAMETERS_PARAGON_METHOD_SETTINGS_QUANT_LABEL_SETTING_type	Not Used
RESULTS_SEARCH_3_PARAMETERS_PARAGON_METHOD_SETTINGS_UI_PSPEP	TRUE
RESULTS_SEARCH_4_time_cpu	627092
RESULTS_SEARCH_4_time_duration	627575
RESULTS_SEARCH_4_version	5.0.2.5174
RESULTS_SEARCH_4_xml:id	SEARCH:2:637478907898508600_1
RESULTS_SEARCH_4_PARAMETERS_chemical_data_edited	FALSE
RESULTS_SEARCH_4_PARAMETERS_do_multiprecursor_search	TRUE
RESULTS_SEARCH_4_PARAMETERS_do_reverse_search	TRUE
RESULTS_SEARCH_4_PARAMETERS_max_quant_labels	35
RESULTS_SEARCH_4_PARAMETERS_maxresults	15
RESULTS_SEARCH_4_PARAMETERS_separate_searches	FALSE
RESULTS_SEARCH_4_PARAMETERS_MSTOLERANCE_type	dalton
RESULTS_SEARCH_4_PARAMETERS_MSTOLERANCE_value	0.05
RESULTS_SEARCH_4_PARAMETERS_MSMSTOLERANCE_type	dalton
RESULTS_SEARCH_4_PARAMETERS_MSMSTOLERANCE_value	0.1
RESULTS_SEARCH_4_PARAMETERS_MS_STANDARD_DEVIATION_type	dalton
RESULTS_SEARCH_4_PARAMETERS_MS_STANDARD_DEVIATION_value	0.0011
RESULTS_SEARCH_4_PARAMETERS_MSMS_STANDARD_DEVIATION_type	dalton
RESULTS_SEARCH_4_PARAMETERS_MSMS_STANDARD_DEVIATION_value	0.01
RESULTS_SEARCH_4_PARAMETERS_FASTA_filename	C:\AB SCIEX\ProteinPilot Data\SearchDatabases\uniprot_Human_reviewed_20210202.fasta
RESULTS_SEARCH_4_PARAMETERS_AUTO_CALIBRATION_ms	TRUE
RESULTS_SEARCH_4_PARAMETERS_AUTO_CALIBRATION_msexport	FALSE
RESULTS_SEARCH_4_PARAMETERS_AUTO_CALIBRATION_msms	TRUE
RESULTS_SEARCH_4_PARAMETERS_AUTO_CALIBRATION_msmstolsdratio	2.75
RESULTS_SEARCH_4_PARAMETERS_AUTO_CALIBRATION_mstolsdratio	7
RESULTS_SEARCH_4_PARAMETERS_AUTO_CALIBRATION_squareroot	TRUE
RESULTS_SEARCH_4_PARAMETERS_AUTO_CALIBRATION_type	dalton
RESULTS_SEARCH_4_PARAMETERS_AUTO_CALIBRATION_MCP_d_s_s_f	0.0666667
RESULTS_SEARCH_4_PARAMETERS_AUTO_CALIBRATION_MCP_d_s_w_f	3
RESULTS_SEARCH_4_PARAMETERS_AUTO_CALIBRATION_MCP_m_f_r_mbc	200
RESULTS_SEARCH_4_PARAMETERS_AUTO_CALIBRATION_MCP_m_m_c	10
RESULTS_SEARCH_4_PARAMETERS_AUTO_CALIBRATION_MCP_m_m_f_s	0.25
RESULTS_SEARCH_4_PARAMETERS_AUTO_CALIBRATION_MCP_m_m_p_f	0.33
RESULTS_SEARCH_4_PARAMETERS_AUTO_CALIBRATION_MCP_m_m_p_rms_f	1
RESULTS_SEARCH_4_PARAMETERS_AUTO_CALIBRATION_MCP_m_p_t_f	1
RESULTS_SEARCH_4_PARAMETERS_AUTO_CALIBRATION_MCP_m_r_h_n_b	15
RESULTS_SEARCH_4_PARAMETERS_AUTO_CALIBRATION_MCP_m_z_n_s	99
RESULTS_SEARCH_4_PARAMETERS_AUTO_CALIBRATION_MCP_m_z_s_mn_f_r	0.0666667
RESULTS_SEARCH_4_PARAMETERS_AUTO_CALIBRATION_MCP_m_z_s_mx_f_r	0.1
RESULTS_SEARCH_4_PARAMETERS_MS_AUTO_CALIBRATION_OUT_avres	7.50918e-08
RESULTS_SEARCH_4_PARAMETERS_MS_AUTO_CALIBRATION_OUT_c0	-0.000507388
RESULTS_SEARCH_4_PARAMETERS_MS_AUTO_CALIBRATION_OUT_c1minus1	2.1034e-05
RESULTS_SEARCH_4_PARAMETERS_MS_AUTO_CALIBRATION_OUT_c2	0
RESULTS_SEARCH_4_PARAMETERS_MS_AUTO_CALIBRATION_OUT_file	1
RESULTS_SEARCH_4_PARAMETERS_MS_AUTO_CALIBRATION_OUT_partnumber	2
RESULTS_SEARCH_4_PARAMETERS_MS_AUTO_CALIBRATION_OUT_polyorder	1
RESULTS_SEARCH_4_PARAMETERS_MS_AUTO_CALIBRATION_OUT_sample	1
RESULTS_SEARCH_4_PARAMETERS_MS_AUTO_CALIBRATION_OUT_squareroot	TRUE
RESULTS_SEARCH_4_PARAMETERS_MSMS_AUTO_CALIBRATION_OUT_avres	-2.31432e-07
RESULTS_SEARCH_4_PARAMETERS_MSMS_AUTO_CALIBRATION_OUT_c0	-0.000153244
RESULTS_SEARCH_4_PARAMETERS_MSMS_AUTO_CALIBRATION_OUT_c1minus1	7.74473e-06
RESULTS_SEARCH_4_PARAMETERS_MSMS_AUTO_CALIBRATION_OUT_c2	0
RESULTS_SEARCH_4_PARAMETERS_MSMS_AUTO_CALIBRATION_OUT_file	1
RESULTS_SEARCH_4_PARAMETERS_MSMS_AUTO_CALIBRATION_OUT_partnumber	2
RESULTS_SEARCH_4_PARAMETERS_MSMS_AUTO_CALIBRATION_OUT_polyorder	1
RESULTS_SEARCH_4_PARAMETERS_MSMS_AUTO_CALIBRATION_OUT_sample	1
RESULTS_SEARCH_4_PARAMETERS_MSMS_AUTO_CALIBRATION_OUT_squareroot	TRUE
RESULTS_SEARCH_4_PARAMETERS_MAX_PRECURSORS_FRAGLET	5
RESULTS_SEARCH_4_PARAMETERS_MAX_PRECURSORS_TAGLET	1
RESULTS_SEARCH_4_PARAMETERS_PRECURSORS_DR_FRAGLET	10
RESULTS_SEARCH_4_PARAMETERS_PRECURSORS_DR_TAGLET	3
RESULTS_SEARCH_4_PARAMETERS_DEFAULT_CHARGE_STATE_1_charge	2
RESULTS_SEARCH_4_PARAMETERS_DEFAULT_CHARGE_STATE_1_probability	1
RESULTS_SEARCH_4_PARAMETERS_DEFAULT_CHARGE_STATE_2_charge	3
RESULTS_SEARCH_4_PARAMETERS_DEFAULT_CHARGE_STATE_2_probability	1
RESULTS_SEARCH_4_PARAMETERS_DEFAULT_CHARGE_STATE_3_charge	4
RESULTS_SEARCH_4_PARAMETERS_DEFAULT_CHARGE_STATE_3_probability	1
RESULTS_SEARCH_4_PARAMETERS_VERSION	5.0.2.0, 5346
RESULTS_SEARCH_4_PARAMETERS_PARAGON_VERSION	5.0.2.0, 5174
RESULTS_SEARCH_4_PARAMETERS_APPLICATION	ProteinPilot(tm) Software
RESULTS_SEARCH_4_PARAMETERS_PROGROUP_alternativedispositionmaximumfoldprobabilitydrop	100
RESULTS_SEARCH_4_PARAMETERS_PROGROUP_alternativedispositionmaximumfoldscoredrop	2
RESULTS_SEARCH_4_PARAMETERS_PROGROUP_autodiscordantpeptidethreshold	0.3
RESULTS_SEARCH_4_PARAMETERS_PROGROUP_bayesconfidencecalclulation	TRUE
RESULTS_SEARCH_4_PARAMETERS_PROGROUP_calibrateconfidence	TRUE
RESULTS_SEARCH_4_PARAMETERS_PROGROUP_compresspeptides	FALSE
RESULTS_SEARCH_4_PARAMETERS_PROGROUP_confidencepercentthresholdforexcludingothersfromquant	15
RESULTS_SEARCH_4_PARAMETERS_PROGROUP_confidencepercentthresholdforincludingselfinquant	15
RESULTS_SEARCH_4_PARAMETERS_PROGROUP_donotstoremspeaklists	FALSE
RESULTS_SEARCH_4_PARAMETERS_PROGROUP_fasta	C:\AB SCIEX\ProteinPilot Data\SearchDatabases\uniprot_Human_reviewed_20210202.fasta
RESULTS_SEARCH_4_PARAMETERS_PROGROUP_featuregroupminpepconf	0.66
RESULTS_SEARCH_4_PARAMETERS_PROGROUP_featuregroupminups	0.47
RESULTS_SEARCH_4_PARAMETERS_PROGROUP_focusingintersection	4
RESULTS_SEARCH_4_PARAMETERS_PROGROUP_focusingminimummatchconfidence	0.1
RESULTS_SEARCH_4_PARAMETERS_PROGROUP_focusingminunusedprotscore	0.1
RESULTS_SEARCH_4_PARAMETERS_PROGROUP_focusingsubsetcutoff	6
RESULTS_SEARCH_4_PARAMETERS_PROGROUP_intersection	1.3
RESULTS_SEARCH_4_PARAMETERS_PROGROUP_minimummatchconfidencecutoff	0.001
RESULTS_SEARCH_4_PARAMETERS_PROGROUP_minunusedprotscore	0.0458
RESULTS_SEARCH_4_PARAMETERS_PROGROUP_subsetcutoff	2
RESULTS_SEARCH_4_PARAMETERS_PROGROUP_uniprotservicehttpssupported	TRUE
RESULTS_SEARCH_4_PARAMETERS_PROGROUP_unusedprotscorethresholdforexcludingothersfromquant	1.3
RESULTS_SEARCH_4_PARAMETERS_PEAKLIST_count	3730
RESULTS_SEARCH_4_PARAMETERS_PEAKLIST_filenumber	1
RESULTS_SEARCH_4_PARAMETERS_PEAKLIST_original_count	3730
RESULTS_SEARCH_4_PARAMETERS_PEAKLIST_originalfilename	C:\DATA\CC\GuoDanDan iTRAQ\??\sample1.wiff
RESULTS_SEARCH_4_PARAMETERS_PEAKLIST_partnumber	2
RESULTS_SEARCH_4_PARAMETERS_QUANT_TYPE_background_correction	FALSE
RESULTS_SEARCH_4_PARAMETERS_QUANT_TYPE_bias_correction	TRUE
RESULTS_SEARCH_4_PARAMETERS_QUANT_TYPE_data_type	MSMS
RESULTS_SEARCH_4_PARAMETERS_QUANT_TYPE_keep_extreme_peptides_over_fraction	0.15
RESULTS_SEARCH_4_PARAMETERS_QUANT_TYPE_low_confidence_check	TRUE
RESULTS_SEARCH_4_PARAMETERS_QUANT_TYPE_low_intensity_check	TRUE
RESULTS_SEARCH_4_PARAMETERS_QUANT_TYPE_median_statistic	FALSE
RESULTS_SEARCH_4_PARAMETERS_QUANT_TYPE_mod_check	TRUE
RESULTS_SEARCH_4_PARAMETERS_QUANT_TYPE_quant_threshold	-1
RESULTS_SEARCH_4_PARAMETERS_QUANT_TYPE_quant_threshold_sn	5
RESULTS_SEARCH_4_PARAMETERS_QUANT_TYPE_separate_searches	FALSE
RESULTS_SEARCH_4_PARAMETERS_QUANT_TYPE_shared_msms_check	TRUE
RESULTS_SEARCH_4_PARAMETERS_QUANT_TYPE_xml:id	iTRAQ8PLEX
RESULTS_SEARCH_4_PARAMETERS_QUANT_TYPE_QUANT_LABEL_display	113
RESULTS_SEARCH_4_PARAMETERS_QUANT_TYPE_QUANT_LABEL_name	IT113
RESULTS_SEARCH_4_PARAMETERS_QUANT_TYPE_QUANT_LABEL_used	TRUE
RESULTS_SEARCH_4_PARAMETERS_QUANT_TYPE_QUANT_LABEL_display	114
RESULTS_SEARCH_4_PARAMETERS_QUANT_TYPE_QUANT_LABEL_name	IT114
RESULTS_SEARCH_4_PARAMETERS_QUANT_TYPE_QUANT_LABEL_used	TRUE
RESULTS_SEARCH_4_PARAMETERS_QUANT_TYPE_QUANT_LABEL_display	1900-04-24
RESULTS_SEARCH_4_PARAMETERS_QUANT_TYPE_QUANT_LABEL_name	IT115
RESULTS_SEARCH_4_PARAMETERS_QUANT_TYPE_QUANT_LABEL_used	TRUE
RESULTS_SEARCH_4_PARAMETERS_QUANT_TYPE_QUANT_LABEL_display	116
RESULTS_SEARCH_4_PARAMETERS_QUANT_TYPE_QUANT_LABEL_name	IT116
RESULTS_SEARCH_4_PARAMETERS_QUANT_TYPE_QUANT_LABEL_used	TRUE
RESULTS_SEARCH_4_PARAMETERS_QUANT_TYPE_QUANT_LABEL_display	117
RESULTS_SEARCH_4_PARAMETERS_QUANT_TYPE_QUANT_LABEL_name	IT117
RESULTS_SEARCH_4_PARAMETERS_QUANT_TYPE_QUANT_LABEL_used	TRUE
RESULTS_SEARCH_4_PARAMETERS_QUANT_TYPE_QUANT_LABEL_display	118
RESULTS_SEARCH_4_PARAMETERS_QUANT_TYPE_QUANT_LABEL_name	IT118
RESULTS_SEARCH_4_PARAMETERS_QUANT_TYPE_QUANT_LABEL_used	TRUE
RESULTS_SEARCH_4_PARAMETERS_QUANT_TYPE_QUANT_LABEL_display	119
RESULTS_SEARCH_4_PARAMETERS_QUANT_TYPE_QUANT_LABEL_name	IT119
RESULTS_SEARCH_4_PARAMETERS_QUANT_TYPE_QUANT_LABEL_used	TRUE
RESULTS_SEARCH_4_PARAMETERS_QUANT_TYPE_QUANT_LABEL_display	121
RESULTS_SEARCH_4_PARAMETERS_QUANT_TYPE_QUANT_LABEL_name	IT121
RESULTS_SEARCH_4_PARAMETERS_QUANT_TYPE_QUANT_LABEL_used	TRUE
RESULTS_SEARCH_4_PARAMETERS_PARAGON_METHOD_SETTINGS_UI_SAMPLE_TYPE	iTRAQ 8plex (Peptide Labeled)
RESULTS_SEARCH_4_PARAMETERS_PARAGON_METHOD_SETTINGS_UI_CYS_ALKYLATION	Iodoacetamide
RESULTS_SEARCH_4_PARAMETERS_PARAGON_METHOD_SETTINGS_UI_DIGESTION	Trypsin
RESULTS_SEARCH_4_PARAMETERS_PARAGON_METHOD_SETTINGS_UI_INSTRUMENT	TripleTOF 5600
RESULTS_SEARCH_4_PARAMETERS_PARAGON_METHOD_SETTINGS_UI_SPECIES	Homo sapiens
RESULTS_SEARCH_4_PARAMETERS_PARAGON_METHOD_SETTINGS_UI_SEARCH_EFFORT	Thorough
RESULTS_SEARCH_4_PARAMETERS_PARAGON_METHOD_SETTINGS_UI_ID_FOCUS	Biological modifications
RESULTS_SEARCH_4_PARAMETERS_PARAGON_METHOD_SETTINGS_UI_USER_NAME	Omics-PC\Omics
RESULTS_SEARCH_4_PARAMETERS_PARAGON_METHOD_SETTINGS_UI_QUANT_TYPE	iTRAQ8PLEX
RESULTS_SEARCH_4_PARAMETERS_PARAGON_METHOD_SETTINGS_UI_MACHINE_NAME	OMICS-PC
RESULTS_SEARCH_4_PARAMETERS_PARAGON_METHOD_SETTINGS_UI_SEARCH_ID	6.37479e+17
RESULTS_SEARCH_4_PARAMETERS_PARAGON_METHOD_SETTINGS_UI_START_TIME	2021-02-02 19:26:30
RESULTS_SEARCH_4_PARAMETERS_PARAGON_METHOD_SETTINGS_UI_MIN_UNUSED_PROTSCORE	0.0458
RESULTS_SEARCH_4_PARAMETERS_PARAGON_METHOD_SETTINGS_QUANT_LABEL_SETTING_minus1	0
RESULTS_SEARCH_4_PARAMETERS_PARAGON_METHOD_SETTINGS_QUANT_LABEL_SETTING_minus2	0
RESULTS_SEARCH_4_PARAMETERS_PARAGON_METHOD_SETTINGS_QUANT_LABEL_SETTING_plus1	6.89
RESULTS_SEARCH_4_PARAMETERS_PARAGON_METHOD_SETTINGS_QUANT_LABEL_SETTING_plus2	0.24
RESULTS_SEARCH_4_PARAMETERS_PARAGON_METHOD_SETTINGS_QUANT_LABEL_SETTING_reagent	iTRAQ113
RESULTS_SEARCH_4_PARAMETERS_PARAGON_METHOD_SETTINGS_QUANT_LABEL_SETTING_type	Not Used
RESULTS_SEARCH_4_PARAMETERS_PARAGON_METHOD_SETTINGS_QUANT_LABEL_SETTING_minus1	0.94
RESULTS_SEARCH_4_PARAMETERS_PARAGON_METHOD_SETTINGS_QUANT_LABEL_SETTING_minus2	0
RESULTS_SEARCH_4_PARAMETERS_PARAGON_METHOD_SETTINGS_QUANT_LABEL_SETTING_plus1	5.9
RESULTS_SEARCH_4_PARAMETERS_PARAGON_METHOD_SETTINGS_QUANT_LABEL_SETTING_plus2	0.16
RESULTS_SEARCH_4_PARAMETERS_PARAGON_METHOD_SETTINGS_QUANT_LABEL_SETTING_reagent	iTRAQ114
RESULTS_SEARCH_4_PARAMETERS_PARAGON_METHOD_SETTINGS_QUANT_LABEL_SETTING_type	Not Used
RESULTS_SEARCH_4_PARAMETERS_PARAGON_METHOD_SETTINGS_QUANT_LABEL_SETTING_minus1	1.88
RESULTS_SEARCH_4_PARAMETERS_PARAGON_METHOD_SETTINGS_QUANT_LABEL_SETTING_minus2	0
RESULTS_SEARCH_4_PARAMETERS_PARAGON_METHOD_SETTINGS_QUANT_LABEL_SETTING_plus1	4.9
RESULTS_SEARCH_4_PARAMETERS_PARAGON_METHOD_SETTINGS_QUANT_LABEL_SETTING_plus2	0.1
RESULTS_SEARCH_4_PARAMETERS_PARAGON_METHOD_SETTINGS_QUANT_LABEL_SETTING_reagent	iTRAQ115
RESULTS_SEARCH_4_PARAMETERS_PARAGON_METHOD_SETTINGS_QUANT_LABEL_SETTING_type	Not Used
RESULTS_SEARCH_4_PARAMETERS_PARAGON_METHOD_SETTINGS_QUANT_LABEL_SETTING_minus1	2.82
RESULTS_SEARCH_4_PARAMETERS_PARAGON_METHOD_SETTINGS_QUANT_LABEL_SETTING_minus2	0
RESULTS_SEARCH_4_PARAMETERS_PARAGON_METHOD_SETTINGS_QUANT_LABEL_SETTING_plus1	3.9
RESULTS_SEARCH_4_PARAMETERS_PARAGON_METHOD_SETTINGS_QUANT_LABEL_SETTING_plus2	0.07
RESULTS_SEARCH_4_PARAMETERS_PARAGON_METHOD_SETTINGS_QUANT_LABEL_SETTING_reagent	iTRAQ116
RESULTS_SEARCH_4_PARAMETERS_PARAGON_METHOD_SETTINGS_QUANT_LABEL_SETTING_type	Not Used
RESULTS_SEARCH_4_PARAMETERS_PARAGON_METHOD_SETTINGS_QUANT_LABEL_SETTING_minus1	3.77
RESULTS_SEARCH_4_PARAMETERS_PARAGON_METHOD_SETTINGS_QUANT_LABEL_SETTING_minus2	0.06
RESULTS_SEARCH_4_PARAMETERS_PARAGON_METHOD_SETTINGS_QUANT_LABEL_SETTING_plus1	2.88
RESULTS_SEARCH_4_PARAMETERS_PARAGON_METHOD_SETTINGS_QUANT_LABEL_SETTING_plus2	0
RESULTS_SEARCH_4_PARAMETERS_PARAGON_METHOD_SETTINGS_QUANT_LABEL_SETTING_reagent	iTRAQ117
RESULTS_SEARCH_4_PARAMETERS_PARAGON_METHOD_SETTINGS_QUANT_LABEL_SETTING_type	Not Used
RESULTS_SEARCH_4_PARAMETERS_PARAGON_METHOD_SETTINGS_QUANT_LABEL_SETTING_minus1	4.71
RESULTS_SEARCH_4_PARAMETERS_PARAGON_METHOD_SETTINGS_QUANT_LABEL_SETTING_minus2	0.09
RESULTS_SEARCH_4_PARAMETERS_PARAGON_METHOD_SETTINGS_QUANT_LABEL_SETTING_plus1	1.91
RESULTS_SEARCH_4_PARAMETERS_PARAGON_METHOD_SETTINGS_QUANT_LABEL_SETTING_plus2	0
RESULTS_SEARCH_4_PARAMETERS_PARAGON_METHOD_SETTINGS_QUANT_LABEL_SETTING_reagent	iTRAQ118
RESULTS_SEARCH_4_PARAMETERS_PARAGON_METHOD_SETTINGS_QUANT_LABEL_SETTING_type	Not Used
RESULTS_SEARCH_4_PARAMETERS_PARAGON_METHOD_SETTINGS_QUANT_LABEL_SETTING_minus1	5.66
RESULTS_SEARCH_4_PARAMETERS_PARAGON_METHOD_SETTINGS_QUANT_LABEL_SETTING_minus2	0.14
RESULTS_SEARCH_4_PARAMETERS_PARAGON_METHOD_SETTINGS_QUANT_LABEL_SETTING_plus1	0.87
RESULTS_SEARCH_4_PARAMETERS_PARAGON_METHOD_SETTINGS_QUANT_LABEL_SETTING_plus2	0
RESULTS_SEARCH_4_PARAMETERS_PARAGON_METHOD_SETTINGS_QUANT_LABEL_SETTING_reagent	iTRAQ119
RESULTS_SEARCH_4_PARAMETERS_PARAGON_METHOD_SETTINGS_QUANT_LABEL_SETTING_type	Not Used
RESULTS_SEARCH_4_PARAMETERS_PARAGON_METHOD_SETTINGS_QUANT_LABEL_SETTING_minus1	7.44
RESULTS_SEARCH_4_PARAMETERS_PARAGON_METHOD_SETTINGS_QUANT_LABEL_SETTING_minus2	0.27
RESULTS_SEARCH_4_PARAMETERS_PARAGON_METHOD_SETTINGS_QUANT_LABEL_SETTING_plus1	0.18
RESULTS_SEARCH_4_PARAMETERS_PARAGON_METHOD_SETTINGS_QUANT_LABEL_SETTING_plus2	0
RESULTS_SEARCH_4_PARAMETERS_PARAGON_METHOD_SETTINGS_QUANT_LABEL_SETTING_reagent	iTRAQ121
RESULTS_SEARCH_4_PARAMETERS_PARAGON_METHOD_SETTINGS_QUANT_LABEL_SETTING_type	Not Used
RESULTS_SEARCH_4_PARAMETERS_PARAGON_METHOD_SETTINGS_UI_PSPEP	TRUE
RESULTS_SEARCH_5_time_cpu	65302
RESULTS_SEARCH_5_time_duration	65300
RESULTS_SEARCH_5_version	5.0.2.5174
RESULTS_SEARCH_5_xml:id	SEARCH:1:637478907898508600_2
RESULTS_SEARCH_5_PARAMETERS_chemical_data_edited	FALSE
RESULTS_SEARCH_5_PARAMETERS_do_multiprecursor_search	TRUE
RESULTS_SEARCH_5_PARAMETERS_do_reverse_search	TRUE
RESULTS_SEARCH_5_PARAMETERS_max_quant_labels	35
RESULTS_SEARCH_5_PARAMETERS_maxresults	15
RESULTS_SEARCH_5_PARAMETERS_separate_searches	FALSE
RESULTS_SEARCH_5_PARAMETERS_MSTOLERANCE_type	dalton
RESULTS_SEARCH_5_PARAMETERS_MSTOLERANCE_value	0.05
RESULTS_SEARCH_5_PARAMETERS_MSMSTOLERANCE_type	dalton
RESULTS_SEARCH_5_PARAMETERS_MSMSTOLERANCE_value	0.1
RESULTS_SEARCH_5_PARAMETERS_MS_STANDARD_DEVIATION_type	dalton
RESULTS_SEARCH_5_PARAMETERS_MS_STANDARD_DEVIATION_value	0.0011
RESULTS_SEARCH_5_PARAMETERS_MSMS_STANDARD_DEVIATION_type	dalton
RESULTS_SEARCH_5_PARAMETERS_MSMS_STANDARD_DEVIATION_value	0.01
RESULTS_SEARCH_5_PARAMETERS_FASTA_filename	C:\AB SCIEX\ProteinPilot Data\SearchDatabases\uniprot_Human_reviewed_20210202.fasta
RESULTS_SEARCH_5_PARAMETERS_AUTO_CALIBRATION_ms	TRUE
RESULTS_SEARCH_5_PARAMETERS_AUTO_CALIBRATION_msexport	FALSE
RESULTS_SEARCH_5_PARAMETERS_AUTO_CALIBRATION_msms	TRUE
RESULTS_SEARCH_5_PARAMETERS_AUTO_CALIBRATION_msmstolsdratio	2.75
RESULTS_SEARCH_5_PARAMETERS_AUTO_CALIBRATION_mstolsdratio	7
RESULTS_SEARCH_5_PARAMETERS_AUTO_CALIBRATION_squareroot	TRUE
RESULTS_SEARCH_5_PARAMETERS_AUTO_CALIBRATION_type	dalton
RESULTS_SEARCH_5_PARAMETERS_AUTO_CALIBRATION_MCP_d_s_s_f	0.0666667
RESULTS_SEARCH_5_PARAMETERS_AUTO_CALIBRATION_MCP_d_s_w_f	3
RESULTS_SEARCH_5_PARAMETERS_AUTO_CALIBRATION_MCP_m_f_r_mbc	200
RESULTS_SEARCH_5_PARAMETERS_AUTO_CALIBRATION_MCP_m_m_c	10
RESULTS_SEARCH_5_PARAMETERS_AUTO_CALIBRATION_MCP_m_m_f_s	0.25
RESULTS_SEARCH_5_PARAMETERS_AUTO_CALIBRATION_MCP_m_m_p_f	0.33
RESULTS_SEARCH_5_PARAMETERS_AUTO_CALIBRATION_MCP_m_m_p_rms_f	1
RESULTS_SEARCH_5_PARAMETERS_AUTO_CALIBRATION_MCP_m_p_t_f	1
RESULTS_SEARCH_5_PARAMETERS_AUTO_CALIBRATION_MCP_m_r_h_n_b	15
RESULTS_SEARCH_5_PARAMETERS_AUTO_CALIBRATION_MCP_m_z_n_s	99
RESULTS_SEARCH_5_PARAMETERS_AUTO_CALIBRATION_MCP_m_z_s_mn_f_r	0.0666667
RESULTS_SEARCH_5_PARAMETERS_AUTO_CALIBRATION_MCP_m_z_s_mx_f_r	0.1
RESULTS_SEARCH_5_PARAMETERS_MS_AUTO_CALIBRATION_OUT_avres	5.50286e-09
RESULTS_SEARCH_5_PARAMETERS_MS_AUTO_CALIBRATION_OUT_c0	-0.000678899
RESULTS_SEARCH_5_PARAMETERS_MS_AUTO_CALIBRATION_OUT_c1minus1	2.7117e-05
RESULTS_SEARCH_5_PARAMETERS_MS_AUTO_CALIBRATION_OUT_c2	0
RESULTS_SEARCH_5_PARAMETERS_MS_AUTO_CALIBRATION_OUT_file	1
RESULTS_SEARCH_5_PARAMETERS_MS_AUTO_CALIBRATION_OUT_partnumber	3
RESULTS_SEARCH_5_PARAMETERS_MS_AUTO_CALIBRATION_OUT_polyorder	1
RESULTS_SEARCH_5_PARAMETERS_MS_AUTO_CALIBRATION_OUT_sample	1
RESULTS_SEARCH_5_PARAMETERS_MS_AUTO_CALIBRATION_OUT_squareroot	TRUE
RESULTS_SEARCH_5_PARAMETERS_MSMS_AUTO_CALIBRATION_OUT_avres	-1.69357e-07
RESULTS_SEARCH_5_PARAMETERS_MSMS_AUTO_CALIBRATION_OUT_c0	-0.000161309
RESULTS_SEARCH_5_PARAMETERS_MSMS_AUTO_CALIBRATION_OUT_c1minus1	8.73309e-06
RESULTS_SEARCH_5_PARAMETERS_MSMS_AUTO_CALIBRATION_OUT_c2	0
RESULTS_SEARCH_5_PARAMETERS_MSMS_AUTO_CALIBRATION_OUT_file	1
RESULTS_SEARCH_5_PARAMETERS_MSMS_AUTO_CALIBRATION_OUT_partnumber	3
RESULTS_SEARCH_5_PARAMETERS_MSMS_AUTO_CALIBRATION_OUT_polyorder	1
RESULTS_SEARCH_5_PARAMETERS_MSMS_AUTO_CALIBRATION_OUT_sample	1
RESULTS_SEARCH_5_PARAMETERS_MSMS_AUTO_CALIBRATION_OUT_squareroot	TRUE
RESULTS_SEARCH_5_PARAMETERS_MAX_PRECURSORS_FRAGLET	5
RESULTS_SEARCH_5_PARAMETERS_MAX_PRECURSORS_TAGLET	1
RESULTS_SEARCH_5_PARAMETERS_PRECURSORS_DR_FRAGLET	10
RESULTS_SEARCH_5_PARAMETERS_PRECURSORS_DR_TAGLET	3
RESULTS_SEARCH_5_PARAMETERS_DEFAULT_CHARGE_STATE_1_charge	2
RESULTS_SEARCH_5_PARAMETERS_DEFAULT_CHARGE_STATE_1_probability	1
RESULTS_SEARCH_5_PARAMETERS_DEFAULT_CHARGE_STATE_2_charge	3
RESULTS_SEARCH_5_PARAMETERS_DEFAULT_CHARGE_STATE_2_probability	1
RESULTS_SEARCH_5_PARAMETERS_DEFAULT_CHARGE_STATE_3_charge	4
RESULTS_SEARCH_5_PARAMETERS_DEFAULT_CHARGE_STATE_3_probability	1
RESULTS_SEARCH_5_PARAMETERS_VERSION	5.0.2.0, 5346
RESULTS_SEARCH_5_PARAMETERS_PARAGON_VERSION	5.0.2.0, 5174
RESULTS_SEARCH_5_PARAMETERS_APPLICATION	ProteinPilot(tm) Software
RESULTS_SEARCH_5_PARAMETERS_PROGROUP_alternativedispositionmaximumfoldprobabilitydrop	100
RESULTS_SEARCH_5_PARAMETERS_PROGROUP_alternativedispositionmaximumfoldscoredrop	2
RESULTS_SEARCH_5_PARAMETERS_PROGROUP_autodiscordantpeptidethreshold	0.3
RESULTS_SEARCH_5_PARAMETERS_PROGROUP_bayesconfidencecalclulation	TRUE
RESULTS_SEARCH_5_PARAMETERS_PROGROUP_calibrateconfidence	TRUE
RESULTS_SEARCH_5_PARAMETERS_PROGROUP_compresspeptides	FALSE
RESULTS_SEARCH_5_PARAMETERS_PROGROUP_confidencepercentthresholdforexcludingothersfromquant	15
RESULTS_SEARCH_5_PARAMETERS_PROGROUP_confidencepercentthresholdforincludingselfinquant	15
RESULTS_SEARCH_5_PARAMETERS_PROGROUP_donotstoremspeaklists	FALSE
RESULTS_SEARCH_5_PARAMETERS_PROGROUP_fasta	C:\AB SCIEX\ProteinPilot Data\SearchDatabases\uniprot_Human_reviewed_20210202.fasta
RESULTS_SEARCH_5_PARAMETERS_PROGROUP_featuregroupminpepconf	0.66
RESULTS_SEARCH_5_PARAMETERS_PROGROUP_featuregroupminups	0.47
RESULTS_SEARCH_5_PARAMETERS_PROGROUP_focusingintersection	4
RESULTS_SEARCH_5_PARAMETERS_PROGROUP_focusingminimummatchconfidence	0.1
RESULTS_SEARCH_5_PARAMETERS_PROGROUP_focusingminunusedprotscore	0.1
RESULTS_SEARCH_5_PARAMETERS_PROGROUP_focusingsubsetcutoff	6
RESULTS_SEARCH_5_PARAMETERS_PROGROUP_intersection	1.3
RESULTS_SEARCH_5_PARAMETERS_PROGROUP_minimummatchconfidencecutoff	0.001
RESULTS_SEARCH_5_PARAMETERS_PROGROUP_minunusedprotscore	0.0458
RESULTS_SEARCH_5_PARAMETERS_PROGROUP_subsetcutoff	2
RESULTS_SEARCH_5_PARAMETERS_PROGROUP_uniprotservicehttpssupported	TRUE
RESULTS_SEARCH_5_PARAMETERS_PROGROUP_unusedprotscorethresholdforexcludingothersfromquant	1.3
RESULTS_SEARCH_5_PARAMETERS_PEAKLIST_count	3727
RESULTS_SEARCH_5_PARAMETERS_PEAKLIST_filenumber	1
RESULTS_SEARCH_5_PARAMETERS_PEAKLIST_original_count	3727
RESULTS_SEARCH_5_PARAMETERS_PEAKLIST_originalfilename	C:\DATA\CC\GuoDanDan iTRAQ\??\sample1.wiff
RESULTS_SEARCH_5_PARAMETERS_PEAKLIST_partnumber	3
RESULTS_SEARCH_5_PARAMETERS_QUANT_TYPE_background_correction	FALSE
RESULTS_SEARCH_5_PARAMETERS_QUANT_TYPE_bias_correction	TRUE
RESULTS_SEARCH_5_PARAMETERS_QUANT_TYPE_data_type	MSMS
RESULTS_SEARCH_5_PARAMETERS_QUANT_TYPE_keep_extreme_peptides_over_fraction	0.15
RESULTS_SEARCH_5_PARAMETERS_QUANT_TYPE_low_confidence_check	TRUE
RESULTS_SEARCH_5_PARAMETERS_QUANT_TYPE_low_intensity_check	TRUE
RESULTS_SEARCH_5_PARAMETERS_QUANT_TYPE_median_statistic	FALSE
RESULTS_SEARCH_5_PARAMETERS_QUANT_TYPE_mod_check	TRUE
RESULTS_SEARCH_5_PARAMETERS_QUANT_TYPE_quant_threshold	-1
RESULTS_SEARCH_5_PARAMETERS_QUANT_TYPE_quant_threshold_sn	5
RESULTS_SEARCH_5_PARAMETERS_QUANT_TYPE_separate_searches	FALSE
RESULTS_SEARCH_5_PARAMETERS_QUANT_TYPE_shared_msms_check	TRUE
RESULTS_SEARCH_5_PARAMETERS_QUANT_TYPE_xml:id	iTRAQ8PLEX
RESULTS_SEARCH_5_PARAMETERS_QUANT_TYPE_QUANT_LABEL_display	1900-04-22
RESULTS_SEARCH_5_PARAMETERS_QUANT_TYPE_QUANT_LABEL_name	IT113
RESULTS_SEARCH_5_PARAMETERS_QUANT_TYPE_QUANT_LABEL_used	TRUE
RESULTS_SEARCH_5_PARAMETERS_QUANT_TYPE_QUANT_LABEL_display	114
RESULTS_SEARCH_5_PARAMETERS_QUANT_TYPE_QUANT_LABEL_name	IT114
RESULTS_SEARCH_5_PARAMETERS_QUANT_TYPE_QUANT_LABEL_used	TRUE
RESULTS_SEARCH_5_PARAMETERS_QUANT_TYPE_QUANT_LABEL_display	115
RESULTS_SEARCH_5_PARAMETERS_QUANT_TYPE_QUANT_LABEL_name	IT115
RESULTS_SEARCH_5_PARAMETERS_QUANT_TYPE_QUANT_LABEL_used	TRUE
RESULTS_SEARCH_5_PARAMETERS_QUANT_TYPE_QUANT_LABEL_display	116
RESULTS_SEARCH_5_PARAMETERS_QUANT_TYPE_QUANT_LABEL_name	IT116
RESULTS_SEARCH_5_PARAMETERS_QUANT_TYPE_QUANT_LABEL_used	TRUE
RESULTS_SEARCH_5_PARAMETERS_QUANT_TYPE_QUANT_LABEL_display	117
RESULTS_SEARCH_5_PARAMETERS_QUANT_TYPE_QUANT_LABEL_name	IT117
RESULTS_SEARCH_5_PARAMETERS_QUANT_TYPE_QUANT_LABEL_used	TRUE
RESULTS_SEARCH_5_PARAMETERS_QUANT_TYPE_QUANT_LABEL_display	118
RESULTS_SEARCH_5_PARAMETERS_QUANT_TYPE_QUANT_LABEL_name	IT118
RESULTS_SEARCH_5_PARAMETERS_QUANT_TYPE_QUANT_LABEL_used	TRUE
RESULTS_SEARCH_5_PARAMETERS_QUANT_TYPE_QUANT_LABEL_display	119
RESULTS_SEARCH_5_PARAMETERS_QUANT_TYPE_QUANT_LABEL_name	IT119
RESULTS_SEARCH_5_PARAMETERS_QUANT_TYPE_QUANT_LABEL_used	TRUE
RESULTS_SEARCH_5_PARAMETERS_QUANT_TYPE_QUANT_LABEL_display	121
RESULTS_SEARCH_5_PARAMETERS_QUANT_TYPE_QUANT_LABEL_name	IT121
RESULTS_SEARCH_5_PARAMETERS_QUANT_TYPE_QUANT_LABEL_used	TRUE
RESULTS_SEARCH_5_PARAMETERS_PARAGON_METHOD_SETTINGS_UI_SAMPLE_TYPE	iTRAQ 8plex (Peptide Labeled)
RESULTS_SEARCH_5_PARAMETERS_PARAGON_METHOD_SETTINGS_UI_CYS_ALKYLATION	Iodoacetamide
RESULTS_SEARCH_5_PARAMETERS_PARAGON_METHOD_SETTINGS_UI_DIGESTION	Trypsin
RESULTS_SEARCH_5_PARAMETERS_PARAGON_METHOD_SETTINGS_UI_INSTRUMENT	TripleTOF 5600
RESULTS_SEARCH_5_PARAMETERS_PARAGON_METHOD_SETTINGS_UI_SPECIES	Homo sapiens
RESULTS_SEARCH_5_PARAMETERS_PARAGON_METHOD_SETTINGS_UI_SEARCH_EFFORT	Thorough
RESULTS_SEARCH_5_PARAMETERS_PARAGON_METHOD_SETTINGS_UI_ID_FOCUS	Biological modifications
RESULTS_SEARCH_5_PARAMETERS_PARAGON_METHOD_SETTINGS_UI_USER_NAME	Omics-PC\Omics
RESULTS_SEARCH_5_PARAMETERS_PARAGON_METHOD_SETTINGS_UI_QUANT_TYPE	iTRAQ8PLEX
RESULTS_SEARCH_5_PARAMETERS_PARAGON_METHOD_SETTINGS_UI_MACHINE_NAME	OMICS-PC
RESULTS_SEARCH_5_PARAMETERS_PARAGON_METHOD_SETTINGS_UI_SEARCH_ID	6.37479e+17
RESULTS_SEARCH_5_PARAMETERS_PARAGON_METHOD_SETTINGS_UI_START_TIME	2021-02-02 19:26:30
RESULTS_SEARCH_5_PARAMETERS_PARAGON_METHOD_SETTINGS_UI_MIN_UNUSED_PROTSCORE	0.0458
RESULTS_SEARCH_5_PARAMETERS_PARAGON_METHOD_SETTINGS_QUANT_LABEL_SETTING_minus1	0
RESULTS_SEARCH_5_PARAMETERS_PARAGON_METHOD_SETTINGS_QUANT_LABEL_SETTING_minus2	0
RESULTS_SEARCH_5_PARAMETERS_PARAGON_METHOD_SETTINGS_QUANT_LABEL_SETTING_plus1	6.89
RESULTS_SEARCH_5_PARAMETERS_PARAGON_METHOD_SETTINGS_QUANT_LABEL_SETTING_plus2	0.24
RESULTS_SEARCH_5_PARAMETERS_PARAGON_METHOD_SETTINGS_QUANT_LABEL_SETTING_reagent	iTRAQ113
RESULTS_SEARCH_5_PARAMETERS_PARAGON_METHOD_SETTINGS_QUANT_LABEL_SETTING_type	Not Used
RESULTS_SEARCH_5_PARAMETERS_PARAGON_METHOD_SETTINGS_QUANT_LABEL_SETTING_minus1	0.94
RESULTS_SEARCH_5_PARAMETERS_PARAGON_METHOD_SETTINGS_QUANT_LABEL_SETTING_minus2	00:00:00
RESULTS_SEARCH_5_PARAMETERS_PARAGON_METHOD_SETTINGS_QUANT_LABEL_SETTING_plus1	5.9
RESULTS_SEARCH_5_PARAMETERS_PARAGON_METHOD_SETTINGS_QUANT_LABEL_SETTING_plus2	0.16
RESULTS_SEARCH_5_PARAMETERS_PARAGON_METHOD_SETTINGS_QUANT_LABEL_SETTING_reagent	iTRAQ114
RESULTS_SEARCH_5_PARAMETERS_PARAGON_METHOD_SETTINGS_QUANT_LABEL_SETTING_type	Not Used
RESULTS_SEARCH_5_PARAMETERS_PARAGON_METHOD_SETTINGS_QUANT_LABEL_SETTING_minus1	1.88
RESULTS_SEARCH_5_PARAMETERS_PARAGON_METHOD_SETTINGS_QUANT_LABEL_SETTING_minus2	0
RESULTS_SEARCH_5_PARAMETERS_PARAGON_METHOD_SETTINGS_QUANT_LABEL_SETTING_plus1	4.9
RESULTS_SEARCH_5_PARAMETERS_PARAGON_METHOD_SETTINGS_QUANT_LABEL_SETTING_plus2	0.1
RESULTS_SEARCH_5_PARAMETERS_PARAGON_METHOD_SETTINGS_QUANT_LABEL_SETTING_reagent	iTRAQ115
RESULTS_SEARCH_5_PARAMETERS_PARAGON_METHOD_SETTINGS_QUANT_LABEL_SETTING_type	Not Used
RESULTS_SEARCH_5_PARAMETERS_PARAGON_METHOD_SETTINGS_QUANT_LABEL_SETTING_minus1	2.82
RESULTS_SEARCH_5_PARAMETERS_PARAGON_METHOD_SETTINGS_QUANT_LABEL_SETTING_minus2	0
RESULTS_SEARCH_5_PARAMETERS_PARAGON_METHOD_SETTINGS_QUANT_LABEL_SETTING_plus1	3.9
RESULTS_SEARCH_5_PARAMETERS_PARAGON_METHOD_SETTINGS_QUANT_LABEL_SETTING_plus2	0.07
RESULTS_SEARCH_5_PARAMETERS_PARAGON_METHOD_SETTINGS_QUANT_LABEL_SETTING_reagent	iTRAQ116
RESULTS_SEARCH_5_PARAMETERS_PARAGON_METHOD_SETTINGS_QUANT_LABEL_SETTING_type	Not Used
RESULTS_SEARCH_5_PARAMETERS_PARAGON_METHOD_SETTINGS_QUANT_LABEL_SETTING_minus1	3.77
RESULTS_SEARCH_5_PARAMETERS_PARAGON_METHOD_SETTINGS_QUANT_LABEL_SETTING_minus2	0.06
RESULTS_SEARCH_5_PARAMETERS_PARAGON_METHOD_SETTINGS_QUANT_LABEL_SETTING_plus1	2.88
RESULTS_SEARCH_5_PARAMETERS_PARAGON_METHOD_SETTINGS_QUANT_LABEL_SETTING_plus2	00:00:00
RESULTS_SEARCH_5_PARAMETERS_PARAGON_METHOD_SETTINGS_QUANT_LABEL_SETTING_reagent	iTRAQ117
RESULTS_SEARCH_5_PARAMETERS_PARAGON_METHOD_SETTINGS_QUANT_LABEL_SETTING_type	Not Used
RESULTS_SEARCH_5_PARAMETERS_PARAGON_METHOD_SETTINGS_QUANT_LABEL_SETTING_minus1	4.71
RESULTS_SEARCH_5_PARAMETERS_PARAGON_METHOD_SETTINGS_QUANT_LABEL_SETTING_minus2	0.09
RESULTS_SEARCH_5_PARAMETERS_PARAGON_METHOD_SETTINGS_QUANT_LABEL_SETTING_plus1	1.91
RESULTS_SEARCH_5_PARAMETERS_PARAGON_METHOD_SETTINGS_QUANT_LABEL_SETTING_plus2	0
RESULTS_SEARCH_5_PARAMETERS_PARAGON_METHOD_SETTINGS_QUANT_LABEL_SETTING_reagent	iTRAQ118
RESULTS_SEARCH_5_PARAMETERS_PARAGON_METHOD_SETTINGS_QUANT_LABEL_SETTING_type	Not Used
RESULTS_SEARCH_5_PARAMETERS_PARAGON_METHOD_SETTINGS_QUANT_LABEL_SETTING_minus1	5.66
RESULTS_SEARCH_5_PARAMETERS_PARAGON_METHOD_SETTINGS_QUANT_LABEL_SETTING_minus2	0.14
RESULTS_SEARCH_5_PARAMETERS_PARAGON_METHOD_SETTINGS_QUANT_LABEL_SETTING_plus1	0.87
RESULTS_SEARCH_5_PARAMETERS_PARAGON_METHOD_SETTINGS_QUANT_LABEL_SETTING_plus2	0
RESULTS_SEARCH_5_PARAMETERS_PARAGON_METHOD_SETTINGS_QUANT_LABEL_SETTING_reagent	iTRAQ119
RESULTS_SEARCH_5_PARAMETERS_PARAGON_METHOD_SETTINGS_QUANT_LABEL_SETTING_type	Not Used
RESULTS_SEARCH_5_PARAMETERS_PARAGON_METHOD_SETTINGS_QUANT_LABEL_SETTING_minus1	7.44
RESULTS_SEARCH_5_PARAMETERS_PARAGON_METHOD_SETTINGS_QUANT_LABEL_SETTING_minus2	0.27
RESULTS_SEARCH_5_PARAMETERS_PARAGON_METHOD_SETTINGS_QUANT_LABEL_SETTING_plus1	0.18
RESULTS_SEARCH_5_PARAMETERS_PARAGON_METHOD_SETTINGS_QUANT_LABEL_SETTING_plus2	0
RESULTS_SEARCH_5_PARAMETERS_PARAGON_METHOD_SETTINGS_QUANT_LABEL_SETTING_reagent	iTRAQ121
RESULTS_SEARCH_5_PARAMETERS_PARAGON_METHOD_SETTINGS_QUANT_LABEL_SETTING_type	Not Used
RESULTS_SEARCH_5_PARAMETERS_PARAGON_METHOD_SETTINGS_UI_PSPEP	TRUE
RESULTS_SEARCH_6_time_cpu	761035
RESULTS_SEARCH_6_time_duration	763865
RESULTS_SEARCH_6_version	5.0.2.5174
RESULTS_SEARCH_6_xml:id	SEARCH:2:637478907898508600_2
RESULTS_SEARCH_6_PARAMETERS_chemical_data_edited	FALSE
RESULTS_SEARCH_6_PARAMETERS_do_multiprecursor_search	TRUE
RESULTS_SEARCH_6_PARAMETERS_do_reverse_search	TRUE
RESULTS_SEARCH_6_PARAMETERS_max_quant_labels	35
RESULTS_SEARCH_6_PARAMETERS_maxresults	15
RESULTS_SEARCH_6_PARAMETERS_separate_searches	FALSE
RESULTS_SEARCH_6_PARAMETERS_MSTOLERANCE_type	dalton
RESULTS_SEARCH_6_PARAMETERS_MSTOLERANCE_value	0.05
RESULTS_SEARCH_6_PARAMETERS_MSMSTOLERANCE_type	dalton
RESULTS_SEARCH_6_PARAMETERS_MSMSTOLERANCE_value	0.1
RESULTS_SEARCH_6_PARAMETERS_MS_STANDARD_DEVIATION_type	dalton
RESULTS_SEARCH_6_PARAMETERS_MS_STANDARD_DEVIATION_value	0.0011
RESULTS_SEARCH_6_PARAMETERS_MSMS_STANDARD_DEVIATION_type	dalton
RESULTS_SEARCH_6_PARAMETERS_MSMS_STANDARD_DEVIATION_value	0.01
RESULTS_SEARCH_6_PARAMETERS_FASTA_filename	C:\AB SCIEX\ProteinPilot Data\SearchDatabases\uniprot_Human_reviewed_20210202.fasta
RESULTS_SEARCH_6_PARAMETERS_AUTO_CALIBRATION_ms	TRUE
RESULTS_SEARCH_6_PARAMETERS_AUTO_CALIBRATION_msexport	FALSE
RESULTS_SEARCH_6_PARAMETERS_AUTO_CALIBRATION_msms	TRUE
RESULTS_SEARCH_6_PARAMETERS_AUTO_CALIBRATION_msmstolsdratio	2.75
RESULTS_SEARCH_6_PARAMETERS_AUTO_CALIBRATION_mstolsdratio	7
RESULTS_SEARCH_6_PARAMETERS_AUTO_CALIBRATION_squareroot	TRUE
RESULTS_SEARCH_6_PARAMETERS_AUTO_CALIBRATION_type	dalton
RESULTS_SEARCH_6_PARAMETERS_AUTO_CALIBRATION_MCP_d_s_s_f	0.0666667
RESULTS_SEARCH_6_PARAMETERS_AUTO_CALIBRATION_MCP_d_s_w_f	3
RESULTS_SEARCH_6_PARAMETERS_AUTO_CALIBRATION_MCP_m_f_r_mbc	200
RESULTS_SEARCH_6_PARAMETERS_AUTO_CALIBRATION_MCP_m_m_c	10
RESULTS_SEARCH_6_PARAMETERS_AUTO_CALIBRATION_MCP_m_m_f_s	0.25
RESULTS_SEARCH_6_PARAMETERS_AUTO_CALIBRATION_MCP_m_m_p_f	0.33
RESULTS_SEARCH_6_PARAMETERS_AUTO_CALIBRATION_MCP_m_m_p_rms_f	1
RESULTS_SEARCH_6_PARAMETERS_AUTO_CALIBRATION_MCP_m_p_t_f	1
RESULTS_SEARCH_6_PARAMETERS_AUTO_CALIBRATION_MCP_m_r_h_n_b	15
RESULTS_SEARCH_6_PARAMETERS_AUTO_CALIBRATION_MCP_m_z_n_s	99
RESULTS_SEARCH_6_PARAMETERS_AUTO_CALIBRATION_MCP_m_z_s_mn_f_r	0.0666667
RESULTS_SEARCH_6_PARAMETERS_AUTO_CALIBRATION_MCP_m_z_s_mx_f_r	0.1
RESULTS_SEARCH_6_PARAMETERS_MS_AUTO_CALIBRATION_OUT_avres	5.50286e-09
RESULTS_SEARCH_6_PARAMETERS_MS_AUTO_CALIBRATION_OUT_c0	-0.000678899
RESULTS_SEARCH_6_PARAMETERS_MS_AUTO_CALIBRATION_OUT_c1minus1	2.7117e-05
RESULTS_SEARCH_6_PARAMETERS_MS_AUTO_CALIBRATION_OUT_c2	0
RESULTS_SEARCH_6_PARAMETERS_MS_AUTO_CALIBRATION_OUT_file	1
RESULTS_SEARCH_6_PARAMETERS_MS_AUTO_CALIBRATION_OUT_partnumber	3
RESULTS_SEARCH_6_PARAMETERS_MS_AUTO_CALIBRATION_OUT_polyorder	1
RESULTS_SEARCH_6_PARAMETERS_MS_AUTO_CALIBRATION_OUT_sample	1
RESULTS_SEARCH_6_PARAMETERS_MS_AUTO_CALIBRATION_OUT_squareroot	TRUE
RESULTS_SEARCH_6_PARAMETERS_MSMS_AUTO_CALIBRATION_OUT_avres	-1.69357e-07
RESULTS_SEARCH_6_PARAMETERS_MSMS_AUTO_CALIBRATION_OUT_c0	-0.000161309
RESULTS_SEARCH_6_PARAMETERS_MSMS_AUTO_CALIBRATION_OUT_c1minus1	8.73309e-06
RESULTS_SEARCH_6_PARAMETERS_MSMS_AUTO_CALIBRATION_OUT_c2	0
RESULTS_SEARCH_6_PARAMETERS_MSMS_AUTO_CALIBRATION_OUT_file	1
RESULTS_SEARCH_6_PARAMETERS_MSMS_AUTO_CALIBRATION_OUT_partnumber	1900-01-03
RESULTS_SEARCH_6_PARAMETERS_MSMS_AUTO_CALIBRATION_OUT_polyorder	1
RESULTS_SEARCH_6_PARAMETERS_MSMS_AUTO_CALIBRATION_OUT_sample	1
RESULTS_SEARCH_6_PARAMETERS_MSMS_AUTO_CALIBRATION_OUT_squareroot	TRUE
RESULTS_SEARCH_6_PARAMETERS_MAX_PRECURSORS_FRAGLET	5
RESULTS_SEARCH_6_PARAMETERS_MAX_PRECURSORS_TAGLET	1
RESULTS_SEARCH_6_PARAMETERS_PRECURSORS_DR_FRAGLET	10
RESULTS_SEARCH_6_PARAMETERS_PRECURSORS_DR_TAGLET	3
RESULTS_SEARCH_6_PARAMETERS_DEFAULT_CHARGE_STATE_1_charge	2
RESULTS_SEARCH_6_PARAMETERS_DEFAULT_CHARGE_STATE_1_probability	1
RESULTS_SEARCH_6_PARAMETERS_DEFAULT_CHARGE_STATE_2_charge	3
RESULTS_SEARCH_6_PARAMETERS_DEFAULT_CHARGE_STATE_2_probability	1
RESULTS_SEARCH_6_PARAMETERS_DEFAULT_CHARGE_STATE_3_charge	4
RESULTS_SEARCH_6_PARAMETERS_DEFAULT_CHARGE_STATE_3_probability	1
RESULTS_SEARCH_6_PARAMETERS_VERSION	5.0.2.0, 5346
RESULTS_SEARCH_6_PARAMETERS_PARAGON_VERSION	5.0.2.0, 5174
RESULTS_SEARCH_6_PARAMETERS_APPLICATION	ProteinPilot(tm) Software
RESULTS_SEARCH_6_PARAMETERS_PROGROUP_alternativedispositionmaximumfoldprobabilitydrop	100
RESULTS_SEARCH_6_PARAMETERS_PROGROUP_alternativedispositionmaximumfoldscoredrop	2
RESULTS_SEARCH_6_PARAMETERS_PROGROUP_autodiscordantpeptidethreshold	0.3
RESULTS_SEARCH_6_PARAMETERS_PROGROUP_bayesconfidencecalclulation	TRUE
RESULTS_SEARCH_6_PARAMETERS_PROGROUP_calibrateconfidence	TRUE
RESULTS_SEARCH_6_PARAMETERS_PROGROUP_compresspeptides	FALSE
RESULTS_SEARCH_6_PARAMETERS_PROGROUP_confidencepercentthresholdforexcludingothersfromquant	1900-01-15
RESULTS_SEARCH_6_PARAMETERS_PROGROUP_confidencepercentthresholdforincludingselfinquant	15
RESULTS_SEARCH_6_PARAMETERS_PROGROUP_donotstoremspeaklists	FALSE
RESULTS_SEARCH_6_PARAMETERS_PROGROUP_fasta	C:\AB SCIEX\ProteinPilot Data\SearchDatabases\uniprot_Human_reviewed_20210202.fasta
RESULTS_SEARCH_6_PARAMETERS_PROGROUP_featuregroupminpepconf	0.66
RESULTS_SEARCH_6_PARAMETERS_PROGROUP_featuregroupminups	0.47
RESULTS_SEARCH_6_PARAMETERS_PROGROUP_focusingintersection	4
RESULTS_SEARCH_6_PARAMETERS_PROGROUP_focusingminimummatchconfidence	0.1
RESULTS_SEARCH_6_PARAMETERS_PROGROUP_focusingminunusedprotscore	0.1
RESULTS_SEARCH_6_PARAMETERS_PROGROUP_focusingsubsetcutoff	6
RESULTS_SEARCH_6_PARAMETERS_PROGROUP_intersection	1.3
RESULTS_SEARCH_6_PARAMETERS_PROGROUP_minimummatchconfidencecutoff	0.001
RESULTS_SEARCH_6_PARAMETERS_PROGROUP_minunusedprotscore	0.0458
RESULTS_SEARCH_6_PARAMETERS_PROGROUP_subsetcutoff	2
RESULTS_SEARCH_6_PARAMETERS_PROGROUP_uniprotservicehttpssupported	TRUE
RESULTS_SEARCH_6_PARAMETERS_PROGROUP_unusedprotscorethresholdforexcludingothersfromquant	1.3
RESULTS_SEARCH_6_PARAMETERS_PEAKLIST_count	3727
RESULTS_SEARCH_6_PARAMETERS_PEAKLIST_filenumber	1
RESULTS_SEARCH_6_PARAMETERS_PEAKLIST_original_count	1910-03-15
RESULTS_SEARCH_6_PARAMETERS_PEAKLIST_originalfilename	C:\DATA\CC\GuoDanDan iTRAQ\??\sample1.wiff
RESULTS_SEARCH_6_PARAMETERS_PEAKLIST_partnumber	3
RESULTS_SEARCH_6_PARAMETERS_QUANT_TYPE_background_correction	FALSE
RESULTS_SEARCH_6_PARAMETERS_QUANT_TYPE_bias_correction	TRUE
RESULTS_SEARCH_6_PARAMETERS_QUANT_TYPE_data_type	MSMS
RESULTS_SEARCH_6_PARAMETERS_QUANT_TYPE_keep_extreme_peptides_over_fraction	0.15
RESULTS_SEARCH_6_PARAMETERS_QUANT_TYPE_low_confidence_check	TRUE
RESULTS_SEARCH_6_PARAMETERS_QUANT_TYPE_low_intensity_check	TRUE
RESULTS_SEARCH_6_PARAMETERS_QUANT_TYPE_median_statistic	FALSE
RESULTS_SEARCH_6_PARAMETERS_QUANT_TYPE_mod_check	TRUE
RESULTS_SEARCH_6_PARAMETERS_QUANT_TYPE_quant_threshold	-1
RESULTS_SEARCH_6_PARAMETERS_QUANT_TYPE_quant_threshold_sn	5
RESULTS_SEARCH_6_PARAMETERS_QUANT_TYPE_separate_searches	FALSE
RESULTS_SEARCH_6_PARAMETERS_QUANT_TYPE_shared_msms_check	TRUE
RESULTS_SEARCH_6_PARAMETERS_QUANT_TYPE_xml:id	iTRAQ8PLEX
RESULTS_SEARCH_6_PARAMETERS_QUANT_TYPE_QUANT_LABEL_display	113
RESULTS_SEARCH_6_PARAMETERS_QUANT_TYPE_QUANT_LABEL_name	IT113
RESULTS_SEARCH_6_PARAMETERS_QUANT_TYPE_QUANT_LABEL_used	TRUE
RESULTS_SEARCH_6_PARAMETERS_QUANT_TYPE_QUANT_LABEL_display	114
RESULTS_SEARCH_6_PARAMETERS_QUANT_TYPE_QUANT_LABEL_name	IT114
RESULTS_SEARCH_6_PARAMETERS_QUANT_TYPE_QUANT_LABEL_used	TRUE
RESULTS_SEARCH_6_PARAMETERS_QUANT_TYPE_QUANT_LABEL_display	115
RESULTS_SEARCH_6_PARAMETERS_QUANT_TYPE_QUANT_LABEL_name	IT115
RESULTS_SEARCH_6_PARAMETERS_QUANT_TYPE_QUANT_LABEL_used	TRUE
RESULTS_SEARCH_6_PARAMETERS_QUANT_TYPE_QUANT_LABEL_display	1900-04-25
RESULTS_SEARCH_6_PARAMETERS_QUANT_TYPE_QUANT_LABEL_name	IT116
RESULTS_SEARCH_6_PARAMETERS_QUANT_TYPE_QUANT_LABEL_used	TRUE
RESULTS_SEARCH_6_PARAMETERS_QUANT_TYPE_QUANT_LABEL_display	117
RESULTS_SEARCH_6_PARAMETERS_QUANT_TYPE_QUANT_LABEL_name	IT117
RESULTS_SEARCH_6_PARAMETERS_QUANT_TYPE_QUANT_LABEL_used	TRUE
RESULTS_SEARCH_6_PARAMETERS_QUANT_TYPE_QUANT_LABEL_display	118
RESULTS_SEARCH_6_PARAMETERS_QUANT_TYPE_QUANT_LABEL_name	IT118
RESULTS_SEARCH_6_PARAMETERS_QUANT_TYPE_QUANT_LABEL_used	TRUE
RESULTS_SEARCH_6_PARAMETERS_QUANT_TYPE_QUANT_LABEL_display	119
RESULTS_SEARCH_6_PARAMETERS_QUANT_TYPE_QUANT_LABEL_name	IT119
RESULTS_SEARCH_6_PARAMETERS_QUANT_TYPE_QUANT_LABEL_used	TRUE
RESULTS_SEARCH_6_PARAMETERS_QUANT_TYPE_QUANT_LABEL_display	121
RESULTS_SEARCH_6_PARAMETERS_QUANT_TYPE_QUANT_LABEL_name	IT121
RESULTS_SEARCH_6_PARAMETERS_QUANT_TYPE_QUANT_LABEL_used	TRUE
RESULTS_SEARCH_6_PARAMETERS_PARAGON_METHOD_SETTINGS_UI_SAMPLE_TYPE	iTRAQ 8plex (Peptide Labeled)
RESULTS_SEARCH_6_PARAMETERS_PARAGON_METHOD_SETTINGS_UI_CYS_ALKYLATION	Iodoacetamide
RESULTS_SEARCH_6_PARAMETERS_PARAGON_METHOD_SETTINGS_UI_DIGESTION	Trypsin
RESULTS_SEARCH_6_PARAMETERS_PARAGON_METHOD_SETTINGS_UI_INSTRUMENT	TripleTOF 5600
RESULTS_SEARCH_6_PARAMETERS_PARAGON_METHOD_SETTINGS_UI_SPECIES	Homo sapiens
RESULTS_SEARCH_6_PARAMETERS_PARAGON_METHOD_SETTINGS_UI_SEARCH_EFFORT	Thorough
RESULTS_SEARCH_6_PARAMETERS_PARAGON_METHOD_SETTINGS_UI_ID_FOCUS	Biological modifications
RESULTS_SEARCH_6_PARAMETERS_PARAGON_METHOD_SETTINGS_UI_USER_NAME	Omics-PC\Omics
RESULTS_SEARCH_6_PARAMETERS_PARAGON_METHOD_SETTINGS_UI_QUANT_TYPE	iTRAQ8PLEX
RESULTS_SEARCH_6_PARAMETERS_PARAGON_METHOD_SETTINGS_UI_MACHINE_NAME	OMICS-PC
RESULTS_SEARCH_6_PARAMETERS_PARAGON_METHOD_SETTINGS_UI_SEARCH_ID	6.37479e+17
RESULTS_SEARCH_6_PARAMETERS_PARAGON_METHOD_SETTINGS_UI_START_TIME	2021-02-02 19:26:30
RESULTS_SEARCH_6_PARAMETERS_PARAGON_METHOD_SETTINGS_UI_MIN_UNUSED_PROTSCORE	0.0458
RESULTS_SEARCH_6_PARAMETERS_PARAGON_METHOD_SETTINGS_QUANT_LABEL_SETTING_minus1	0
RESULTS_SEARCH_6_PARAMETERS_PARAGON_METHOD_SETTINGS_QUANT_LABEL_SETTING_minus2	0
RESULTS_SEARCH_6_PARAMETERS_PARAGON_METHOD_SETTINGS_QUANT_LABEL_SETTING_plus1	6.89
RESULTS_SEARCH_6_PARAMETERS_PARAGON_METHOD_SETTINGS_QUANT_LABEL_SETTING_plus2	0.24
RESULTS_SEARCH_6_PARAMETERS_PARAGON_METHOD_SETTINGS_QUANT_LABEL_SETTING_reagent	iTRAQ113
RESULTS_SEARCH_6_PARAMETERS_PARAGON_METHOD_SETTINGS_QUANT_LABEL_SETTING_type	Not Used
RESULTS_SEARCH_6_PARAMETERS_PARAGON_METHOD_SETTINGS_QUANT_LABEL_SETTING_minus1	0.94
RESULTS_SEARCH_6_PARAMETERS_PARAGON_METHOD_SETTINGS_QUANT_LABEL_SETTING_minus2	0
RESULTS_SEARCH_6_PARAMETERS_PARAGON_METHOD_SETTINGS_QUANT_LABEL_SETTING_plus1	5.9
RESULTS_SEARCH_6_PARAMETERS_PARAGON_METHOD_SETTINGS_QUANT_LABEL_SETTING_plus2	03:50:24
RESULTS_SEARCH_6_PARAMETERS_PARAGON_METHOD_SETTINGS_QUANT_LABEL_SETTING_reagent	iTRAQ114
RESULTS_SEARCH_6_PARAMETERS_PARAGON_METHOD_SETTINGS_QUANT_LABEL_SETTING_type	Not Used
RESULTS_SEARCH_6_PARAMETERS_PARAGON_METHOD_SETTINGS_QUANT_LABEL_SETTING_minus1	1.88
RESULTS_SEARCH_6_PARAMETERS_PARAGON_METHOD_SETTINGS_QUANT_LABEL_SETTING_minus2	0
RESULTS_SEARCH_6_PARAMETERS_PARAGON_METHOD_SETTINGS_QUANT_LABEL_SETTING_plus1	4.9
RESULTS_SEARCH_6_PARAMETERS_PARAGON_METHOD_SETTINGS_QUANT_LABEL_SETTING_plus2	0.1
RESULTS_SEARCH_6_PARAMETERS_PARAGON_METHOD_SETTINGS_QUANT_LABEL_SETTING_reagent	iTRAQ115
RESULTS_SEARCH_6_PARAMETERS_PARAGON_METHOD_SETTINGS_QUANT_LABEL_SETTING_type	Not Used
RESULTS_SEARCH_6_PARAMETERS_PARAGON_METHOD_SETTINGS_QUANT_LABEL_SETTING_minus1	2.82
RESULTS_SEARCH_6_PARAMETERS_PARAGON_METHOD_SETTINGS_QUANT_LABEL_SETTING_minus2	0
RESULTS_SEARCH_6_PARAMETERS_PARAGON_METHOD_SETTINGS_QUANT_LABEL_SETTING_plus1	3.9
RESULTS_SEARCH_6_PARAMETERS_PARAGON_METHOD_SETTINGS_QUANT_LABEL_SETTING_plus2	0.07
RESULTS_SEARCH_6_PARAMETERS_PARAGON_METHOD_SETTINGS_QUANT_LABEL_SETTING_reagent	iTRAQ116
RESULTS_SEARCH_6_PARAMETERS_PARAGON_METHOD_SETTINGS_QUANT_LABEL_SETTING_type	Not Used
RESULTS_SEARCH_6_PARAMETERS_PARAGON_METHOD_SETTINGS_QUANT_LABEL_SETTING_minus1	1900-01-03 18:28:48
RESULTS_SEARCH_6_PARAMETERS_PARAGON_METHOD_SETTINGS_QUANT_LABEL_SETTING_minus2	0.06
RESULTS_SEARCH_6_PARAMETERS_PARAGON_METHOD_SETTINGS_QUANT_LABEL_SETTING_plus1	2.88
RESULTS_SEARCH_6_PARAMETERS_PARAGON_METHOD_SETTINGS_QUANT_LABEL_SETTING_plus2	0
RESULTS_SEARCH_6_PARAMETERS_PARAGON_METHOD_SETTINGS_QUANT_LABEL_SETTING_reagent	iTRAQ117
RESULTS_SEARCH_6_PARAMETERS_PARAGON_METHOD_SETTINGS_QUANT_LABEL_SETTING_type	Not Used
RESULTS_SEARCH_6_PARAMETERS_PARAGON_METHOD_SETTINGS_QUANT_LABEL_SETTING_minus1	4.71
RESULTS_SEARCH_6_PARAMETERS_PARAGON_METHOD_SETTINGS_QUANT_LABEL_SETTING_minus2	0.09
RESULTS_SEARCH_6_PARAMETERS_PARAGON_METHOD_SETTINGS_QUANT_LABEL_SETTING_plus1	1.91
RESULTS_SEARCH_6_PARAMETERS_PARAGON_METHOD_SETTINGS_QUANT_LABEL_SETTING_plus2	0
RESULTS_SEARCH_6_PARAMETERS_PARAGON_METHOD_SETTINGS_QUANT_LABEL_SETTING_reagent	iTRAQ118
RESULTS_SEARCH_6_PARAMETERS_PARAGON_METHOD_SETTINGS_QUANT_LABEL_SETTING_type	Not Used
RESULTS_SEARCH_6_PARAMETERS_PARAGON_METHOD_SETTINGS_QUANT_LABEL_SETTING_minus1	5.66
RESULTS_SEARCH_6_PARAMETERS_PARAGON_METHOD_SETTINGS_QUANT_LABEL_SETTING_minus2	0.14
RESULTS_SEARCH_6_PARAMETERS_PARAGON_METHOD_SETTINGS_QUANT_LABEL_SETTING_plus1	0.87
RESULTS_SEARCH_6_PARAMETERS_PARAGON_METHOD_SETTINGS_QUANT_LABEL_SETTING_plus2	0
RESULTS_SEARCH_6_PARAMETERS_PARAGON_METHOD_SETTINGS_QUANT_LABEL_SETTING_reagent	iTRAQ119
RESULTS_SEARCH_6_PARAMETERS_PARAGON_METHOD_SETTINGS_QUANT_LABEL_SETTING_type	Not Used
RESULTS_SEARCH_6_PARAMETERS_PARAGON_METHOD_SETTINGS_QUANT_LABEL_SETTING_minus1	7.44
RESULTS_SEARCH_6_PARAMETERS_PARAGON_METHOD_SETTINGS_QUANT_LABEL_SETTING_minus2	0.27
RESULTS_SEARCH_6_PARAMETERS_PARAGON_METHOD_SETTINGS_QUANT_LABEL_SETTING_plus1	0.18
RESULTS_SEARCH_6_PARAMETERS_PARAGON_METHOD_SETTINGS_QUANT_LABEL_SETTING_plus2	0
RESULTS_SEARCH_6_PARAMETERS_PARAGON_METHOD_SETTINGS_QUANT_LABEL_SETTING_reagent	iTRAQ121
RESULTS_SEARCH_6_PARAMETERS_PARAGON_METHOD_SETTINGS_QUANT_LABEL_SETTING_type	Not Used
RESULTS_SEARCH_6_PARAMETERS_PARAGON_METHOD_SETTINGS_UI_PSPEP	TRUE
RESULTS_SEARCH_7_time_cpu	51854
RESULTS_SEARCH_7_time_duration	51885
RESULTS_SEARCH_7_version	5.0.2.5174
RESULTS_SEARCH_7_xml:id	SEARCH:1:637478907898508600_3
RESULTS_SEARCH_7_PARAMETERS_chemical_data_edited	FALSE
RESULTS_SEARCH_7_PARAMETERS_do_multiprecursor_search	TRUE
RESULTS_SEARCH_7_PARAMETERS_do_reverse_search	TRUE
RESULTS_SEARCH_7_PARAMETERS_max_quant_labels	35
RESULTS_SEARCH_7_PARAMETERS_maxresults	15
RESULTS_SEARCH_7_PARAMETERS_separate_searches	FALSE
RESULTS_SEARCH_7_PARAMETERS_MSTOLERANCE_type	dalton
RESULTS_SEARCH_7_PARAMETERS_MSTOLERANCE_value	0.05
RESULTS_SEARCH_7_PARAMETERS_MSMSTOLERANCE_type	dalton
RESULTS_SEARCH_7_PARAMETERS_MSMSTOLERANCE_value	0.1
RESULTS_SEARCH_7_PARAMETERS_MS_STANDARD_DEVIATION_type	dalton
RESULTS_SEARCH_7_PARAMETERS_MS_STANDARD_DEVIATION_value	0.0011
RESULTS_SEARCH_7_PARAMETERS_MSMS_STANDARD_DEVIATION_type	dalton
RESULTS_SEARCH_7_PARAMETERS_MSMS_STANDARD_DEVIATION_value	0.01
RESULTS_SEARCH_7_PARAMETERS_FASTA_filename	C:\AB SCIEX\ProteinPilot Data\SearchDatabases\uniprot_Human_reviewed_20210202.fasta
RESULTS_SEARCH_7_PARAMETERS_AUTO_CALIBRATION_ms	TRUE
RESULTS_SEARCH_7_PARAMETERS_AUTO_CALIBRATION_msexport	FALSE
RESULTS_SEARCH_7_PARAMETERS_AUTO_CALIBRATION_msms	TRUE
RESULTS_SEARCH_7_PARAMETERS_AUTO_CALIBRATION_msmstolsdratio	2.75
RESULTS_SEARCH_7_PARAMETERS_AUTO_CALIBRATION_mstolsdratio	7
RESULTS_SEARCH_7_PARAMETERS_AUTO_CALIBRATION_squareroot	TRUE
RESULTS_SEARCH_7_PARAMETERS_AUTO_CALIBRATION_type	dalton
RESULTS_SEARCH_7_PARAMETERS_AUTO_CALIBRATION_MCP_d_s_s_f	0.0666667
RESULTS_SEARCH_7_PARAMETERS_AUTO_CALIBRATION_MCP_d_s_w_f	3
RESULTS_SEARCH_7_PARAMETERS_AUTO_CALIBRATION_MCP_m_f_r_mbc	200
RESULTS_SEARCH_7_PARAMETERS_AUTO_CALIBRATION_MCP_m_m_c	10
RESULTS_SEARCH_7_PARAMETERS_AUTO_CALIBRATION_MCP_m_m_f_s	0.25
RESULTS_SEARCH_7_PARAMETERS_AUTO_CALIBRATION_MCP_m_m_p_f	0.33
RESULTS_SEARCH_7_PARAMETERS_AUTO_CALIBRATION_MCP_m_m_p_rms_f	1
RESULTS_SEARCH_7_PARAMETERS_AUTO_CALIBRATION_MCP_m_p_t_f	1
RESULTS_SEARCH_7_PARAMETERS_AUTO_CALIBRATION_MCP_m_r_h_n_b	15
RESULTS_SEARCH_7_PARAMETERS_AUTO_CALIBRATION_MCP_m_z_n_s	99
RESULTS_SEARCH_7_PARAMETERS_AUTO_CALIBRATION_MCP_m_z_s_mn_f_r	0.0666667
RESULTS_SEARCH_7_PARAMETERS_AUTO_CALIBRATION_MCP_m_z_s_mx_f_r	0.1
RESULTS_SEARCH_7_PARAMETERS_MS_AUTO_CALIBRATION_OUT_avres	1.36403e-08
RESULTS_SEARCH_7_PARAMETERS_MS_AUTO_CALIBRATION_OUT_c0	-0.000575068
RESULTS_SEARCH_7_PARAMETERS_MS_AUTO_CALIBRATION_OUT_c1minus1	2.39013e-05
RESULTS_SEARCH_7_PARAMETERS_MS_AUTO_CALIBRATION_OUT_c2	0
RESULTS_SEARCH_7_PARAMETERS_MS_AUTO_CALIBRATION_OUT_file	1
RESULTS_SEARCH_7_PARAMETERS_MS_AUTO_CALIBRATION_OUT_partnumber	4
RESULTS_SEARCH_7_PARAMETERS_MS_AUTO_CALIBRATION_OUT_polyorder	1
RESULTS_SEARCH_7_PARAMETERS_MS_AUTO_CALIBRATION_OUT_sample	1
RESULTS_SEARCH_7_PARAMETERS_MS_AUTO_CALIBRATION_OUT_squareroot	TRUE
RESULTS_SEARCH_7_PARAMETERS_MSMS_AUTO_CALIBRATION_OUT_avres	-8.44087e-08
RESULTS_SEARCH_7_PARAMETERS_MSMS_AUTO_CALIBRATION_OUT_c0	-0.000130448
RESULTS_SEARCH_7_PARAMETERS_MSMS_AUTO_CALIBRATION_OUT_c1minus1	8.17852e-06
RESULTS_SEARCH_7_PARAMETERS_MSMS_AUTO_CALIBRATION_OUT_c2	0
RESULTS_SEARCH_7_PARAMETERS_MSMS_AUTO_CALIBRATION_OUT_file	1
RESULTS_SEARCH_7_PARAMETERS_MSMS_AUTO_CALIBRATION_OUT_partnumber	4
RESULTS_SEARCH_7_PARAMETERS_MSMS_AUTO_CALIBRATION_OUT_polyorder	1
RESULTS_SEARCH_7_PARAMETERS_MSMS_AUTO_CALIBRATION_OUT_sample	1
RESULTS_SEARCH_7_PARAMETERS_MSMS_AUTO_CALIBRATION_OUT_squareroot	TRUE
RESULTS_SEARCH_7_PARAMETERS_MAX_PRECURSORS_FRAGLET	5
RESULTS_SEARCH_7_PARAMETERS_MAX_PRECURSORS_TAGLET	1
RESULTS_SEARCH_7_PARAMETERS_PRECURSORS_DR_FRAGLET	10
RESULTS_SEARCH_7_PARAMETERS_PRECURSORS_DR_TAGLET	3
RESULTS_SEARCH_7_PARAMETERS_DEFAULT_CHARGE_STATE_1_charge	2
RESULTS_SEARCH_7_PARAMETERS_DEFAULT_CHARGE_STATE_1_probability	1
RESULTS_SEARCH_7_PARAMETERS_DEFAULT_CHARGE_STATE_2_charge	3
RESULTS_SEARCH_7_PARAMETERS_DEFAULT_CHARGE_STATE_2_probability	1900-01-01
RESULTS_SEARCH_7_PARAMETERS_DEFAULT_CHARGE_STATE_3_charge	4
RESULTS_SEARCH_7_PARAMETERS_DEFAULT_CHARGE_STATE_3_probability	1
RESULTS_SEARCH_7_PARAMETERS_VERSION	5.0.2.0, 5346
RESULTS_SEARCH_7_PARAMETERS_PARAGON_VERSION	5.0.2.0, 5174
RESULTS_SEARCH_7_PARAMETERS_APPLICATION	ProteinPilot(tm) Software
RESULTS_SEARCH_7_PARAMETERS_PROGROUP_alternativedispositionmaximumfoldprobabilitydrop	100
RESULTS_SEARCH_7_PARAMETERS_PROGROUP_alternativedispositionmaximumfoldscoredrop	2
RESULTS_SEARCH_7_PARAMETERS_PROGROUP_autodiscordantpeptidethreshold	0.3
RESULTS_SEARCH_7_PARAMETERS_PROGROUP_bayesconfidencecalclulation	TRUE
RESULTS_SEARCH_7_PARAMETERS_PROGROUP_calibrateconfidence	TRUE
RESULTS_SEARCH_7_PARAMETERS_PROGROUP_compresspeptides	FALSE
RESULTS_SEARCH_7_PARAMETERS_PROGROUP_confidencepercentthresholdforexcludingothersfromquant	15
RESULTS_SEARCH_7_PARAMETERS_PROGROUP_confidencepercentthresholdforincludingselfinquant	15
RESULTS_SEARCH_7_PARAMETERS_PROGROUP_donotstoremspeaklists	FALSE
RESULTS_SEARCH_7_PARAMETERS_PROGROUP_fasta	C:\AB SCIEX\ProteinPilot Data\SearchDatabases\uniprot_Human_reviewed_20210202.fasta
RESULTS_SEARCH_7_PARAMETERS_PROGROUP_featuregroupminpepconf	0.66
RESULTS_SEARCH_7_PARAMETERS_PROGROUP_featuregroupminups	0.47
RESULTS_SEARCH_7_PARAMETERS_PROGROUP_focusingintersection	4
RESULTS_SEARCH_7_PARAMETERS_PROGROUP_focusingminimummatchconfidence	0.1
RESULTS_SEARCH_7_PARAMETERS_PROGROUP_focusingminunusedprotscore	0.1
RESULTS_SEARCH_7_PARAMETERS_PROGROUP_focusingsubsetcutoff	6
RESULTS_SEARCH_7_PARAMETERS_PROGROUP_intersection	1.3
RESULTS_SEARCH_7_PARAMETERS_PROGROUP_minimummatchconfidencecutoff	0.001
RESULTS_SEARCH_7_PARAMETERS_PROGROUP_minunusedprotscore	01:05:57.120000
RESULTS_SEARCH_7_PARAMETERS_PROGROUP_subsetcutoff	2
RESULTS_SEARCH_7_PARAMETERS_PROGROUP_uniprotservicehttpssupported	TRUE
RESULTS_SEARCH_7_PARAMETERS_PROGROUP_unusedprotscorethresholdforexcludingothersfromquant	1.3
RESULTS_SEARCH_7_PARAMETERS_PEAKLIST_count	3729
RESULTS_SEARCH_7_PARAMETERS_PEAKLIST_filenumber	1
RESULTS_SEARCH_7_PARAMETERS_PEAKLIST_original_count	3729
RESULTS_SEARCH_7_PARAMETERS_PEAKLIST_originalfilename	C:\DATA\CC\GuoDanDan iTRAQ\??\sample1.wiff
RESULTS_SEARCH_7_PARAMETERS_PEAKLIST_partnumber	1900-01-04
RESULTS_SEARCH_7_PARAMETERS_QUANT_TYPE_background_correction	FALSE
RESULTS_SEARCH_7_PARAMETERS_QUANT_TYPE_bias_correction	TRUE
RESULTS_SEARCH_7_PARAMETERS_QUANT_TYPE_data_type	MSMS
RESULTS_SEARCH_7_PARAMETERS_QUANT_TYPE_keep_extreme_peptides_over_fraction	0.15
RESULTS_SEARCH_7_PARAMETERS_QUANT_TYPE_low_confidence_check	TRUE
RESULTS_SEARCH_7_PARAMETERS_QUANT_TYPE_low_intensity_check	TRUE
RESULTS_SEARCH_7_PARAMETERS_QUANT_TYPE_median_statistic	FALSE
RESULTS_SEARCH_7_PARAMETERS_QUANT_TYPE_mod_check	TRUE
RESULTS_SEARCH_7_PARAMETERS_QUANT_TYPE_quant_threshold	-1
RESULTS_SEARCH_7_PARAMETERS_QUANT_TYPE_quant_threshold_sn	5
RESULTS_SEARCH_7_PARAMETERS_QUANT_TYPE_separate_searches	FALSE
RESULTS_SEARCH_7_PARAMETERS_QUANT_TYPE_shared_msms_check	TRUE
RESULTS_SEARCH_7_PARAMETERS_QUANT_TYPE_xml:id	iTRAQ8PLEX
RESULTS_SEARCH_7_PARAMETERS_QUANT_TYPE_QUANT_LABEL_display	113
RESULTS_SEARCH_7_PARAMETERS_QUANT_TYPE_QUANT_LABEL_name	IT113
RESULTS_SEARCH_7_PARAMETERS_QUANT_TYPE_QUANT_LABEL_used	TRUE
RESULTS_SEARCH_7_PARAMETERS_QUANT_TYPE_QUANT_LABEL_display	114
RESULTS_SEARCH_7_PARAMETERS_QUANT_TYPE_QUANT_LABEL_name	IT114
RESULTS_SEARCH_7_PARAMETERS_QUANT_TYPE_QUANT_LABEL_used	TRUE
RESULTS_SEARCH_7_PARAMETERS_QUANT_TYPE_QUANT_LABEL_display	115
RESULTS_SEARCH_7_PARAMETERS_QUANT_TYPE_QUANT_LABEL_name	IT115
RESULTS_SEARCH_7_PARAMETERS_QUANT_TYPE_QUANT_LABEL_used	TRUE
RESULTS_SEARCH_7_PARAMETERS_QUANT_TYPE_QUANT_LABEL_display	116
RESULTS_SEARCH_7_PARAMETERS_QUANT_TYPE_QUANT_LABEL_name	IT116
RESULTS_SEARCH_7_PARAMETERS_QUANT_TYPE_QUANT_LABEL_used	TRUE
RESULTS_SEARCH_7_PARAMETERS_QUANT_TYPE_QUANT_LABEL_display	117
RESULTS_SEARCH_7_PARAMETERS_QUANT_TYPE_QUANT_LABEL_name	IT117
RESULTS_SEARCH_7_PARAMETERS_QUANT_TYPE_QUANT_LABEL_used	TRUE
RESULTS_SEARCH_7_PARAMETERS_QUANT_TYPE_QUANT_LABEL_display	118
RESULTS_SEARCH_7_PARAMETERS_QUANT_TYPE_QUANT_LABEL_name	IT118
RESULTS_SEARCH_7_PARAMETERS_QUANT_TYPE_QUANT_LABEL_used	TRUE
RESULTS_SEARCH_7_PARAMETERS_QUANT_TYPE_QUANT_LABEL_display	119
RESULTS_SEARCH_7_PARAMETERS_QUANT_TYPE_QUANT_LABEL_name	IT119
RESULTS_SEARCH_7_PARAMETERS_QUANT_TYPE_QUANT_LABEL_used	TRUE
RESULTS_SEARCH_7_PARAMETERS_QUANT_TYPE_QUANT_LABEL_display	121
RESULTS_SEARCH_7_PARAMETERS_QUANT_TYPE_QUANT_LABEL_name	IT121
RESULTS_SEARCH_7_PARAMETERS_QUANT_TYPE_QUANT_LABEL_used	TRUE
RESULTS_SEARCH_7_PARAMETERS_PARAGON_METHOD_SETTINGS_UI_SAMPLE_TYPE	iTRAQ 8plex (Peptide Labeled)
RESULTS_SEARCH_7_PARAMETERS_PARAGON_METHOD_SETTINGS_UI_CYS_ALKYLATION	Iodoacetamide
RESULTS_SEARCH_7_PARAMETERS_PARAGON_METHOD_SETTINGS_UI_DIGESTION	Trypsin
RESULTS_SEARCH_7_PARAMETERS_PARAGON_METHOD_SETTINGS_UI_INSTRUMENT	TripleTOF 5600
RESULTS_SEARCH_7_PARAMETERS_PARAGON_METHOD_SETTINGS_UI_SPECIES	Homo sapiens
RESULTS_SEARCH_7_PARAMETERS_PARAGON_METHOD_SETTINGS_UI_SEARCH_EFFORT	Thorough
RESULTS_SEARCH_7_PARAMETERS_PARAGON_METHOD_SETTINGS_UI_ID_FOCUS	Biological modifications
RESULTS_SEARCH_7_PARAMETERS_PARAGON_METHOD_SETTINGS_UI_USER_NAME	Omics-PC\Omics
RESULTS_SEARCH_7_PARAMETERS_PARAGON_METHOD_SETTINGS_UI_QUANT_TYPE	iTRAQ8PLEX
RESULTS_SEARCH_7_PARAMETERS_PARAGON_METHOD_SETTINGS_UI_MACHINE_NAME	OMICS-PC
RESULTS_SEARCH_7_PARAMETERS_PARAGON_METHOD_SETTINGS_UI_SEARCH_ID	6.37479e+17
RESULTS_SEARCH_7_PARAMETERS_PARAGON_METHOD_SETTINGS_UI_START_TIME	2021-02-02 19:26:30
RESULTS_SEARCH_7_PARAMETERS_PARAGON_METHOD_SETTINGS_UI_MIN_UNUSED_PROTSCORE	0.0458
RESULTS_SEARCH_7_PARAMETERS_PARAGON_METHOD_SETTINGS_QUANT_LABEL_SETTING_minus1	0
RESULTS_SEARCH_7_PARAMETERS_PARAGON_METHOD_SETTINGS_QUANT_LABEL_SETTING_minus2	0
RESULTS_SEARCH_7_PARAMETERS_PARAGON_METHOD_SETTINGS_QUANT_LABEL_SETTING_plus1	6.89
RESULTS_SEARCH_7_PARAMETERS_PARAGON_METHOD_SETTINGS_QUANT_LABEL_SETTING_plus2	0.24
RESULTS_SEARCH_7_PARAMETERS_PARAGON_METHOD_SETTINGS_QUANT_LABEL_SETTING_reagent	iTRAQ113
RESULTS_SEARCH_7_PARAMETERS_PARAGON_METHOD_SETTINGS_QUANT_LABEL_SETTING_type	Not Used
RESULTS_SEARCH_7_PARAMETERS_PARAGON_METHOD_SETTINGS_QUANT_LABEL_SETTING_minus1	0.94
RESULTS_SEARCH_7_PARAMETERS_PARAGON_METHOD_SETTINGS_QUANT_LABEL_SETTING_minus2	0
RESULTS_SEARCH_7_PARAMETERS_PARAGON_METHOD_SETTINGS_QUANT_LABEL_SETTING_plus1	5.9
RESULTS_SEARCH_7_PARAMETERS_PARAGON_METHOD_SETTINGS_QUANT_LABEL_SETTING_plus2	0.16
RESULTS_SEARCH_7_PARAMETERS_PARAGON_METHOD_SETTINGS_QUANT_LABEL_SETTING_reagent	iTRAQ114
RESULTS_SEARCH_7_PARAMETERS_PARAGON_METHOD_SETTINGS_QUANT_LABEL_SETTING_type	Not Used
RESULTS_SEARCH_7_PARAMETERS_PARAGON_METHOD_SETTINGS_QUANT_LABEL_SETTING_minus1	1.88
RESULTS_SEARCH_7_PARAMETERS_PARAGON_METHOD_SETTINGS_QUANT_LABEL_SETTING_minus2	0
RESULTS_SEARCH_7_PARAMETERS_PARAGON_METHOD_SETTINGS_QUANT_LABEL_SETTING_plus1	4.9
RESULTS_SEARCH_7_PARAMETERS_PARAGON_METHOD_SETTINGS_QUANT_LABEL_SETTING_plus2	0.1
RESULTS_SEARCH_7_PARAMETERS_PARAGON_METHOD_SETTINGS_QUANT_LABEL_SETTING_reagent	iTRAQ115
RESULTS_SEARCH_7_PARAMETERS_PARAGON_METHOD_SETTINGS_QUANT_LABEL_SETTING_type	Not Used
RESULTS_SEARCH_7_PARAMETERS_PARAGON_METHOD_SETTINGS_QUANT_LABEL_SETTING_minus1	2.82
RESULTS_SEARCH_7_PARAMETERS_PARAGON_METHOD_SETTINGS_QUANT_LABEL_SETTING_minus2	0
RESULTS_SEARCH_7_PARAMETERS_PARAGON_METHOD_SETTINGS_QUANT_LABEL_SETTING_plus1	3.9
RESULTS_SEARCH_7_PARAMETERS_PARAGON_METHOD_SETTINGS_QUANT_LABEL_SETTING_plus2	0.07
RESULTS_SEARCH_7_PARAMETERS_PARAGON_METHOD_SETTINGS_QUANT_LABEL_SETTING_reagent	iTRAQ116
RESULTS_SEARCH_7_PARAMETERS_PARAGON_METHOD_SETTINGS_QUANT_LABEL_SETTING_type	Not Used
RESULTS_SEARCH_7_PARAMETERS_PARAGON_METHOD_SETTINGS_QUANT_LABEL_SETTING_minus1	3.77
RESULTS_SEARCH_7_PARAMETERS_PARAGON_METHOD_SETTINGS_QUANT_LABEL_SETTING_minus2	0.06
RESULTS_SEARCH_7_PARAMETERS_PARAGON_METHOD_SETTINGS_QUANT_LABEL_SETTING_plus1	2.88
RESULTS_SEARCH_7_PARAMETERS_PARAGON_METHOD_SETTINGS_QUANT_LABEL_SETTING_plus2	0
RESULTS_SEARCH_7_PARAMETERS_PARAGON_METHOD_SETTINGS_QUANT_LABEL_SETTING_reagent	iTRAQ117
RESULTS_SEARCH_7_PARAMETERS_PARAGON_METHOD_SETTINGS_QUANT_LABEL_SETTING_type	Not Used
RESULTS_SEARCH_7_PARAMETERS_PARAGON_METHOD_SETTINGS_QUANT_LABEL_SETTING_minus1	4.71
RESULTS_SEARCH_7_PARAMETERS_PARAGON_METHOD_SETTINGS_QUANT_LABEL_SETTING_minus2	0.09
RESULTS_SEARCH_7_PARAMETERS_PARAGON_METHOD_SETTINGS_QUANT_LABEL_SETTING_plus1	1.91
RESULTS_SEARCH_7_PARAMETERS_PARAGON_METHOD_SETTINGS_QUANT_LABEL_SETTING_plus2	0
RESULTS_SEARCH_7_PARAMETERS_PARAGON_METHOD_SETTINGS_QUANT_LABEL_SETTING_reagent	iTRAQ118
RESULTS_SEARCH_7_PARAMETERS_PARAGON_METHOD_SETTINGS_QUANT_LABEL_SETTING_type	Not Used
RESULTS_SEARCH_7_PARAMETERS_PARAGON_METHOD_SETTINGS_QUANT_LABEL_SETTING_minus1	5.66
RESULTS_SEARCH_7_PARAMETERS_PARAGON_METHOD_SETTINGS_QUANT_LABEL_SETTING_minus2	0.14
RESULTS_SEARCH_7_PARAMETERS_PARAGON_METHOD_SETTINGS_QUANT_LABEL_SETTING_plus1	0.87
RESULTS_SEARCH_7_PARAMETERS_PARAGON_METHOD_SETTINGS_QUANT_LABEL_SETTING_plus2	0
RESULTS_SEARCH_7_PARAMETERS_PARAGON_METHOD_SETTINGS_QUANT_LABEL_SETTING_reagent	iTRAQ119
RESULTS_SEARCH_7_PARAMETERS_PARAGON_METHOD_SETTINGS_QUANT_LABEL_SETTING_type	Not Used
RESULTS_SEARCH_7_PARAMETERS_PARAGON_METHOD_SETTINGS_QUANT_LABEL_SETTING_minus1	7.44
RESULTS_SEARCH_7_PARAMETERS_PARAGON_METHOD_SETTINGS_QUANT_LABEL_SETTING_minus2	0.27
RESULTS_SEARCH_7_PARAMETERS_PARAGON_METHOD_SETTINGS_QUANT_LABEL_SETTING_plus1	0.18
RESULTS_SEARCH_7_PARAMETERS_PARAGON_METHOD_SETTINGS_QUANT_LABEL_SETTING_plus2	0
RESULTS_SEARCH_7_PARAMETERS_PARAGON_METHOD_SETTINGS_QUANT_LABEL_SETTING_reagent	iTRAQ121
RESULTS_SEARCH_7_PARAMETERS_PARAGON_METHOD_SETTINGS_QUANT_LABEL_SETTING_type	Not Used
RESULTS_SEARCH_7_PARAMETERS_PARAGON_METHOD_SETTINGS_UI_PSPEP	TRUE
RESULTS_SEARCH_8_time_cpu	765528
RESULTS_SEARCH_8_time_duration	765651
RESULTS_SEARCH_8_version	5.0.2.5174
RESULTS_SEARCH_8_xml:id	SEARCH:2:637478907898508600_3
RESULTS_SEARCH_8_PARAMETERS_chemical_data_edited	FALSE
RESULTS_SEARCH_8_PARAMETERS_do_multiprecursor_search	TRUE
RESULTS_SEARCH_8_PARAMETERS_do_reverse_search	TRUE
RESULTS_SEARCH_8_PARAMETERS_max_quant_labels	35
RESULTS_SEARCH_8_PARAMETERS_maxresults	1900-01-15
RESULTS_SEARCH_8_PARAMETERS_separate_searches	FALSE
RESULTS_SEARCH_8_PARAMETERS_MSTOLERANCE_type	dalton
RESULTS_SEARCH_8_PARAMETERS_MSTOLERANCE_value	0.05
RESULTS_SEARCH_8_PARAMETERS_MSMSTOLERANCE_type	dalton
RESULTS_SEARCH_8_PARAMETERS_MSMSTOLERANCE_value	0.1
RESULTS_SEARCH_8_PARAMETERS_MS_STANDARD_DEVIATION_type	dalton
RESULTS_SEARCH_8_PARAMETERS_MS_STANDARD_DEVIATION_value	0.0011
RESULTS_SEARCH_8_PARAMETERS_MSMS_STANDARD_DEVIATION_type	dalton
RESULTS_SEARCH_8_PARAMETERS_MSMS_STANDARD_DEVIATION_value	0.01
RESULTS_SEARCH_8_PARAMETERS_FASTA_filename	C:\AB SCIEX\ProteinPilot Data\SearchDatabases\uniprot_Human_reviewed_20210202.fasta
RESULTS_SEARCH_8_PARAMETERS_AUTO_CALIBRATION_ms	TRUE
RESULTS_SEARCH_8_PARAMETERS_AUTO_CALIBRATION_msexport	FALSE
RESULTS_SEARCH_8_PARAMETERS_AUTO_CALIBRATION_msms	TRUE
RESULTS_SEARCH_8_PARAMETERS_AUTO_CALIBRATION_msmstolsdratio	2.75
RESULTS_SEARCH_8_PARAMETERS_AUTO_CALIBRATION_mstolsdratio	7
RESULTS_SEARCH_8_PARAMETERS_AUTO_CALIBRATION_squareroot	TRUE
RESULTS_SEARCH_8_PARAMETERS_AUTO_CALIBRATION_type	dalton
RESULTS_SEARCH_8_PARAMETERS_AUTO_CALIBRATION_MCP_d_s_s_f	0.0666667
RESULTS_SEARCH_8_PARAMETERS_AUTO_CALIBRATION_MCP_d_s_w_f	3
RESULTS_SEARCH_8_PARAMETERS_AUTO_CALIBRATION_MCP_m_f_r_mbc	200
RESULTS_SEARCH_8_PARAMETERS_AUTO_CALIBRATION_MCP_m_m_c	10
RESULTS_SEARCH_8_PARAMETERS_AUTO_CALIBRATION_MCP_m_m_f_s	0.25
RESULTS_SEARCH_8_PARAMETERS_AUTO_CALIBRATION_MCP_m_m_p_f	0.33
RESULTS_SEARCH_8_PARAMETERS_AUTO_CALIBRATION_MCP_m_m_p_rms_f	1
RESULTS_SEARCH_8_PARAMETERS_AUTO_CALIBRATION_MCP_m_p_t_f	1
RESULTS_SEARCH_8_PARAMETERS_AUTO_CALIBRATION_MCP_m_r_h_n_b	15
RESULTS_SEARCH_8_PARAMETERS_AUTO_CALIBRATION_MCP_m_z_n_s	99
RESULTS_SEARCH_8_PARAMETERS_AUTO_CALIBRATION_MCP_m_z_s_mn_f_r	0.0666667
RESULTS_SEARCH_8_PARAMETERS_AUTO_CALIBRATION_MCP_m_z_s_mx_f_r	0.1
RESULTS_SEARCH_8_PARAMETERS_MS_AUTO_CALIBRATION_OUT_avres	1.36403e-08
RESULTS_SEARCH_8_PARAMETERS_MS_AUTO_CALIBRATION_OUT_c0	-0.000575068
RESULTS_SEARCH_8_PARAMETERS_MS_AUTO_CALIBRATION_OUT_c1minus1	2.39013e-05
RESULTS_SEARCH_8_PARAMETERS_MS_AUTO_CALIBRATION_OUT_c2	0
RESULTS_SEARCH_8_PARAMETERS_MS_AUTO_CALIBRATION_OUT_file	1
RESULTS_SEARCH_8_PARAMETERS_MS_AUTO_CALIBRATION_OUT_partnumber	4
RESULTS_SEARCH_8_PARAMETERS_MS_AUTO_CALIBRATION_OUT_polyorder	1
RESULTS_SEARCH_8_PARAMETERS_MS_AUTO_CALIBRATION_OUT_sample	1
RESULTS_SEARCH_8_PARAMETERS_MS_AUTO_CALIBRATION_OUT_squareroot	TRUE
RESULTS_SEARCH_8_PARAMETERS_MSMS_AUTO_CALIBRATION_OUT_avres	-8.44087e-08
RESULTS_SEARCH_8_PARAMETERS_MSMS_AUTO_CALIBRATION_OUT_c0	-0.000130448
RESULTS_SEARCH_8_PARAMETERS_MSMS_AUTO_CALIBRATION_OUT_c1minus1	8.17852e-06
RESULTS_SEARCH_8_PARAMETERS_MSMS_AUTO_CALIBRATION_OUT_c2	0
RESULTS_SEARCH_8_PARAMETERS_MSMS_AUTO_CALIBRATION_OUT_file	1
RESULTS_SEARCH_8_PARAMETERS_MSMS_AUTO_CALIBRATION_OUT_partnumber	4
RESULTS_SEARCH_8_PARAMETERS_MSMS_AUTO_CALIBRATION_OUT_polyorder	1
RESULTS_SEARCH_8_PARAMETERS_MSMS_AUTO_CALIBRATION_OUT_sample	1
RESULTS_SEARCH_8_PARAMETERS_MSMS_AUTO_CALIBRATION_OUT_squareroot	TRUE
RESULTS_SEARCH_8_PARAMETERS_MAX_PRECURSORS_FRAGLET	5
RESULTS_SEARCH_8_PARAMETERS_MAX_PRECURSORS_TAGLET	1
RESULTS_SEARCH_8_PARAMETERS_PRECURSORS_DR_FRAGLET	10
RESULTS_SEARCH_8_PARAMETERS_PRECURSORS_DR_TAGLET	3
RESULTS_SEARCH_8_PARAMETERS_DEFAULT_CHARGE_STATE_1_charge	1900-01-02
RESULTS_SEARCH_8_PARAMETERS_DEFAULT_CHARGE_STATE_1_probability	1
RESULTS_SEARCH_8_PARAMETERS_DEFAULT_CHARGE_STATE_2_charge	3
RESULTS_SEARCH_8_PARAMETERS_DEFAULT_CHARGE_STATE_2_probability	1
RESULTS_SEARCH_8_PARAMETERS_DEFAULT_CHARGE_STATE_3_charge	4
RESULTS_SEARCH_8_PARAMETERS_DEFAULT_CHARGE_STATE_3_probability	1
RESULTS_SEARCH_8_PARAMETERS_VERSION	5.0.2.0, 5346
RESULTS_SEARCH_8_PARAMETERS_PARAGON_VERSION	5.0.2.0, 5174
RESULTS_SEARCH_8_PARAMETERS_APPLICATION	ProteinPilot(tm) Software
RESULTS_SEARCH_8_PARAMETERS_PROGROUP_alternativedispositionmaximumfoldprobabilitydrop	100
RESULTS_SEARCH_8_PARAMETERS_PROGROUP_alternativedispositionmaximumfoldscoredrop	2
RESULTS_SEARCH_8_PARAMETERS_PROGROUP_autodiscordantpeptidethreshold	0.3
RESULTS_SEARCH_8_PARAMETERS_PROGROUP_bayesconfidencecalclulation	TRUE
RESULTS_SEARCH_8_PARAMETERS_PROGROUP_calibrateconfidence	TRUE
RESULTS_SEARCH_8_PARAMETERS_PROGROUP_compresspeptides	FALSE
RESULTS_SEARCH_8_PARAMETERS_PROGROUP_confidencepercentthresholdforexcludingothersfromquant	15
RESULTS_SEARCH_8_PARAMETERS_PROGROUP_confidencepercentthresholdforincludingselfinquant	15
RESULTS_SEARCH_8_PARAMETERS_PROGROUP_donotstoremspeaklists	FALSE
RESULTS_SEARCH_8_PARAMETERS_PROGROUP_fasta	C:\AB SCIEX\ProteinPilot Data\SearchDatabases\uniprot_Human_reviewed_20210202.fasta
RESULTS_SEARCH_8_PARAMETERS_PROGROUP_featuregroupminpepconf	0.66
RESULTS_SEARCH_8_PARAMETERS_PROGROUP_featuregroupminups	0.47
RESULTS_SEARCH_8_PARAMETERS_PROGROUP_focusingintersection	4
RESULTS_SEARCH_8_PARAMETERS_PROGROUP_focusingminimummatchconfidence	0.1
RESULTS_SEARCH_8_PARAMETERS_PROGROUP_focusingminunusedprotscore	0.1
RESULTS_SEARCH_8_PARAMETERS_PROGROUP_focusingsubsetcutoff	6
RESULTS_SEARCH_8_PARAMETERS_PROGROUP_intersection	1.3
RESULTS_SEARCH_8_PARAMETERS_PROGROUP_minimummatchconfidencecutoff	0.001
RESULTS_SEARCH_8_PARAMETERS_PROGROUP_minunusedprotscore	0.0458
RESULTS_SEARCH_8_PARAMETERS_PROGROUP_subsetcutoff	2
RESULTS_SEARCH_8_PARAMETERS_PROGROUP_uniprotservicehttpssupported	TRUE
RESULTS_SEARCH_8_PARAMETERS_PROGROUP_unusedprotscorethresholdforexcludingothersfromquant	1.3
RESULTS_SEARCH_8_PARAMETERS_PEAKLIST_count	3729
RESULTS_SEARCH_8_PARAMETERS_PEAKLIST_filenumber	1
RESULTS_SEARCH_8_PARAMETERS_PEAKLIST_original_count	3729
RESULTS_SEARCH_8_PARAMETERS_PEAKLIST_originalfilename	C:\DATA\CC\GuoDanDan iTRAQ\??\sample1.wiff
RESULTS_SEARCH_8_PARAMETERS_PEAKLIST_partnumber	4
RESULTS_SEARCH_8_PARAMETERS_QUANT_TYPE_background_correction	FALSE
RESULTS_SEARCH_8_PARAMETERS_QUANT_TYPE_bias_correction	TRUE
RESULTS_SEARCH_8_PARAMETERS_QUANT_TYPE_data_type	MSMS
RESULTS_SEARCH_8_PARAMETERS_QUANT_TYPE_keep_extreme_peptides_over_fraction	0.15
RESULTS_SEARCH_8_PARAMETERS_QUANT_TYPE_low_confidence_check	TRUE
RESULTS_SEARCH_8_PARAMETERS_QUANT_TYPE_low_intensity_check	TRUE
RESULTS_SEARCH_8_PARAMETERS_QUANT_TYPE_median_statistic	FALSE
RESULTS_SEARCH_8_PARAMETERS_QUANT_TYPE_mod_check	TRUE
RESULTS_SEARCH_8_PARAMETERS_QUANT_TYPE_quant_threshold	-1
RESULTS_SEARCH_8_PARAMETERS_QUANT_TYPE_quant_threshold_sn	5
RESULTS_SEARCH_8_PARAMETERS_QUANT_TYPE_separate_searches	FALSE
RESULTS_SEARCH_8_PARAMETERS_QUANT_TYPE_shared_msms_check	TRUE
RESULTS_SEARCH_8_PARAMETERS_QUANT_TYPE_xml:id	iTRAQ8PLEX
RESULTS_SEARCH_8_PARAMETERS_QUANT_TYPE_QUANT_LABEL_display	113
RESULTS_SEARCH_8_PARAMETERS_QUANT_TYPE_QUANT_LABEL_name	IT113
RESULTS_SEARCH_8_PARAMETERS_QUANT_TYPE_QUANT_LABEL_used	TRUE
RESULTS_SEARCH_8_PARAMETERS_QUANT_TYPE_QUANT_LABEL_display	114
RESULTS_SEARCH_8_PARAMETERS_QUANT_TYPE_QUANT_LABEL_name	IT114
RESULTS_SEARCH_8_PARAMETERS_QUANT_TYPE_QUANT_LABEL_used	TRUE
RESULTS_SEARCH_8_PARAMETERS_QUANT_TYPE_QUANT_LABEL_display	115
RESULTS_SEARCH_8_PARAMETERS_QUANT_TYPE_QUANT_LABEL_name	IT115
RESULTS_SEARCH_8_PARAMETERS_QUANT_TYPE_QUANT_LABEL_used	TRUE
RESULTS_SEARCH_8_PARAMETERS_QUANT_TYPE_QUANT_LABEL_display	116
RESULTS_SEARCH_8_PARAMETERS_QUANT_TYPE_QUANT_LABEL_name	IT116
RESULTS_SEARCH_8_PARAMETERS_QUANT_TYPE_QUANT_LABEL_used	TRUE
RESULTS_SEARCH_8_PARAMETERS_QUANT_TYPE_QUANT_LABEL_display	117
RESULTS_SEARCH_8_PARAMETERS_QUANT_TYPE_QUANT_LABEL_name	IT117
RESULTS_SEARCH_8_PARAMETERS_QUANT_TYPE_QUANT_LABEL_used	TRUE
RESULTS_SEARCH_8_PARAMETERS_QUANT_TYPE_QUANT_LABEL_display	118
RESULTS_SEARCH_8_PARAMETERS_QUANT_TYPE_QUANT_LABEL_name	IT118
RESULTS_SEARCH_8_PARAMETERS_QUANT_TYPE_QUANT_LABEL_used	TRUE
RESULTS_SEARCH_8_PARAMETERS_QUANT_TYPE_QUANT_LABEL_display	119
RESULTS_SEARCH_8_PARAMETERS_QUANT_TYPE_QUANT_LABEL_name	IT119
RESULTS_SEARCH_8_PARAMETERS_QUANT_TYPE_QUANT_LABEL_used	TRUE
RESULTS_SEARCH_8_PARAMETERS_QUANT_TYPE_QUANT_LABEL_display	121
RESULTS_SEARCH_8_PARAMETERS_QUANT_TYPE_QUANT_LABEL_name	IT121
RESULTS_SEARCH_8_PARAMETERS_QUANT_TYPE_QUANT_LABEL_used	TRUE
RESULTS_SEARCH_8_PARAMETERS_PARAGON_METHOD_SETTINGS_UI_SAMPLE_TYPE	iTRAQ 8plex (Peptide Labeled)
RESULTS_SEARCH_8_PARAMETERS_PARAGON_METHOD_SETTINGS_UI_CYS_ALKYLATION	Iodoacetamide
RESULTS_SEARCH_8_PARAMETERS_PARAGON_METHOD_SETTINGS_UI_DIGESTION	Trypsin
RESULTS_SEARCH_8_PARAMETERS_PARAGON_METHOD_SETTINGS_UI_INSTRUMENT	TripleTOF 5600
RESULTS_SEARCH_8_PARAMETERS_PARAGON_METHOD_SETTINGS_UI_SPECIES	Homo sapiens
RESULTS_SEARCH_8_PARAMETERS_PARAGON_METHOD_SETTINGS_UI_SEARCH_EFFORT	Thorough
RESULTS_SEARCH_8_PARAMETERS_PARAGON_METHOD_SETTINGS_UI_ID_FOCUS	Biological modifications
RESULTS_SEARCH_8_PARAMETERS_PARAGON_METHOD_SETTINGS_UI_USER_NAME	Omics-PC\Omics
RESULTS_SEARCH_8_PARAMETERS_PARAGON_METHOD_SETTINGS_UI_QUANT_TYPE	iTRAQ8PLEX
RESULTS_SEARCH_8_PARAMETERS_PARAGON_METHOD_SETTINGS_UI_MACHINE_NAME	OMICS-PC
RESULTS_SEARCH_8_PARAMETERS_PARAGON_METHOD_SETTINGS_UI_SEARCH_ID	6.37479e+17
RESULTS_SEARCH_8_PARAMETERS_PARAGON_METHOD_SETTINGS_UI_START_TIME	2021-02-02 19:26:30
RESULTS_SEARCH_8_PARAMETERS_PARAGON_METHOD_SETTINGS_UI_MIN_UNUSED_PROTSCORE	0.0458
RESULTS_SEARCH_8_PARAMETERS_PARAGON_METHOD_SETTINGS_QUANT_LABEL_SETTING_minus1	0
RESULTS_SEARCH_8_PARAMETERS_PARAGON_METHOD_SETTINGS_QUANT_LABEL_SETTING_minus2	0
RESULTS_SEARCH_8_PARAMETERS_PARAGON_METHOD_SETTINGS_QUANT_LABEL_SETTING_plus1	1900-01-06 21:21:36
RESULTS_SEARCH_8_PARAMETERS_PARAGON_METHOD_SETTINGS_QUANT_LABEL_SETTING_plus2	0.24
RESULTS_SEARCH_8_PARAMETERS_PARAGON_METHOD_SETTINGS_QUANT_LABEL_SETTING_reagent	iTRAQ113
RESULTS_SEARCH_8_PARAMETERS_PARAGON_METHOD_SETTINGS_QUANT_LABEL_SETTING_type	Not Used
RESULTS_SEARCH_8_PARAMETERS_PARAGON_METHOD_SETTINGS_QUANT_LABEL_SETTING_minus1	0.94
RESULTS_SEARCH_8_PARAMETERS_PARAGON_METHOD_SETTINGS_QUANT_LABEL_SETTING_minus2	00:00:00
RESULTS_SEARCH_8_PARAMETERS_PARAGON_METHOD_SETTINGS_QUANT_LABEL_SETTING_plus1	5.9
RESULTS_SEARCH_8_PARAMETERS_PARAGON_METHOD_SETTINGS_QUANT_LABEL_SETTING_plus2	0.16
RESULTS_SEARCH_8_PARAMETERS_PARAGON_METHOD_SETTINGS_QUANT_LABEL_SETTING_reagent	iTRAQ114
RESULTS_SEARCH_8_PARAMETERS_PARAGON_METHOD_SETTINGS_QUANT_LABEL_SETTING_type	Not Used
RESULTS_SEARCH_8_PARAMETERS_PARAGON_METHOD_SETTINGS_QUANT_LABEL_SETTING_minus1	1.88
RESULTS_SEARCH_8_PARAMETERS_PARAGON_METHOD_SETTINGS_QUANT_LABEL_SETTING_minus2	0
RESULTS_SEARCH_8_PARAMETERS_PARAGON_METHOD_SETTINGS_QUANT_LABEL_SETTING_plus1	4.9
RESULTS_SEARCH_8_PARAMETERS_PARAGON_METHOD_SETTINGS_QUANT_LABEL_SETTING_plus2	0.1
RESULTS_SEARCH_8_PARAMETERS_PARAGON_METHOD_SETTINGS_QUANT_LABEL_SETTING_reagent	iTRAQ115
RESULTS_SEARCH_8_PARAMETERS_PARAGON_METHOD_SETTINGS_QUANT_LABEL_SETTING_type	Not Used
RESULTS_SEARCH_8_PARAMETERS_PARAGON_METHOD_SETTINGS_QUANT_LABEL_SETTING_minus1	2.82
RESULTS_SEARCH_8_PARAMETERS_PARAGON_METHOD_SETTINGS_QUANT_LABEL_SETTING_minus2	0
RESULTS_SEARCH_8_PARAMETERS_PARAGON_METHOD_SETTINGS_QUANT_LABEL_SETTING_plus1	3.9
RESULTS_SEARCH_8_PARAMETERS_PARAGON_METHOD_SETTINGS_QUANT_LABEL_SETTING_plus2	0.07
RESULTS_SEARCH_8_PARAMETERS_PARAGON_METHOD_SETTINGS_QUANT_LABEL_SETTING_reagent	iTRAQ116
RESULTS_SEARCH_8_PARAMETERS_PARAGON_METHOD_SETTINGS_QUANT_LABEL_SETTING_type	Not Used
RESULTS_SEARCH_8_PARAMETERS_PARAGON_METHOD_SETTINGS_QUANT_LABEL_SETTING_minus1	3.77
RESULTS_SEARCH_8_PARAMETERS_PARAGON_METHOD_SETTINGS_QUANT_LABEL_SETTING_minus2	0.06
RESULTS_SEARCH_8_PARAMETERS_PARAGON_METHOD_SETTINGS_QUANT_LABEL_SETTING_plus1	2.88
RESULTS_SEARCH_8_PARAMETERS_PARAGON_METHOD_SETTINGS_QUANT_LABEL_SETTING_plus2	0
RESULTS_SEARCH_8_PARAMETERS_PARAGON_METHOD_SETTINGS_QUANT_LABEL_SETTING_reagent	iTRAQ117
RESULTS_SEARCH_8_PARAMETERS_PARAGON_METHOD_SETTINGS_QUANT_LABEL_SETTING_type	Not Used
RESULTS_SEARCH_8_PARAMETERS_PARAGON_METHOD_SETTINGS_QUANT_LABEL_SETTING_minus1	4.71
RESULTS_SEARCH_8_PARAMETERS_PARAGON_METHOD_SETTINGS_QUANT_LABEL_SETTING_minus2	0.09
RESULTS_SEARCH_8_PARAMETERS_PARAGON_METHOD_SETTINGS_QUANT_LABEL_SETTING_plus1	1.91
RESULTS_SEARCH_8_PARAMETERS_PARAGON_METHOD_SETTINGS_QUANT_LABEL_SETTING_plus2	00:00:00
RESULTS_SEARCH_8_PARAMETERS_PARAGON_METHOD_SETTINGS_QUANT_LABEL_SETTING_reagent	iTRAQ118
RESULTS_SEARCH_8_PARAMETERS_PARAGON_METHOD_SETTINGS_QUANT_LABEL_SETTING_type	Not Used
RESULTS_SEARCH_8_PARAMETERS_PARAGON_METHOD_SETTINGS_QUANT_LABEL_SETTING_minus1	5.66
RESULTS_SEARCH_8_PARAMETERS_PARAGON_METHOD_SETTINGS_QUANT_LABEL_SETTING_minus2	0.14
RESULTS_SEARCH_8_PARAMETERS_PARAGON_METHOD_SETTINGS_QUANT_LABEL_SETTING_plus1	0.87
RESULTS_SEARCH_8_PARAMETERS_PARAGON_METHOD_SETTINGS_QUANT_LABEL_SETTING_plus2	0
RESULTS_SEARCH_8_PARAMETERS_PARAGON_METHOD_SETTINGS_QUANT_LABEL_SETTING_reagent	iTRAQ119
RESULTS_SEARCH_8_PARAMETERS_PARAGON_METHOD_SETTINGS_QUANT_LABEL_SETTING_type	Not Used
RESULTS_SEARCH_8_PARAMETERS_PARAGON_METHOD_SETTINGS_QUANT_LABEL_SETTING_minus1	7.44
RESULTS_SEARCH_8_PARAMETERS_PARAGON_METHOD_SETTINGS_QUANT_LABEL_SETTING_minus2	0.27
RESULTS_SEARCH_8_PARAMETERS_PARAGON_METHOD_SETTINGS_QUANT_LABEL_SETTING_plus1	0.18
RESULTS_SEARCH_8_PARAMETERS_PARAGON_METHOD_SETTINGS_QUANT_LABEL_SETTING_plus2	0
RESULTS_SEARCH_8_PARAMETERS_PARAGON_METHOD_SETTINGS_QUANT_LABEL_SETTING_reagent	iTRAQ121
RESULTS_SEARCH_8_PARAMETERS_PARAGON_METHOD_SETTINGS_QUANT_LABEL_SETTING_type	Not Used
RESULTS_SEARCH_8_PARAMETERS_PARAGON_METHOD_SETTINGS_UI_PSPEP	TRUE
RESULTS_SEARCH_9_time_cpu	33337
RESULTS_SEARCH_9_time_duration	33358
RESULTS_SEARCH_9_version	5.0.2.5174
RESULTS_SEARCH_9_xml:id	SEARCH:1:637478907898508600_4
RESULTS_SEARCH_9_PARAMETERS_chemical_data_edited	FALSE
RESULTS_SEARCH_9_PARAMETERS_do_multiprecursor_search	TRUE
RESULTS_SEARCH_9_PARAMETERS_do_reverse_search	TRUE
RESULTS_SEARCH_9_PARAMETERS_max_quant_labels	35
RESULTS_SEARCH_9_PARAMETERS_maxresults	15
RESULTS_SEARCH_9_PARAMETERS_separate_searches	FALSE
RESULTS_SEARCH_9_PARAMETERS_MSTOLERANCE_type	dalton
RESULTS_SEARCH_9_PARAMETERS_MSTOLERANCE_value	0.05
RESULTS_SEARCH_9_PARAMETERS_MSMSTOLERANCE_type	dalton
RESULTS_SEARCH_9_PARAMETERS_MSMSTOLERANCE_value	0.1
RESULTS_SEARCH_9_PARAMETERS_MS_STANDARD_DEVIATION_type	dalton
RESULTS_SEARCH_9_PARAMETERS_MS_STANDARD_DEVIATION_value	0.0011
RESULTS_SEARCH_9_PARAMETERS_MSMS_STANDARD_DEVIATION_type	dalton
RESULTS_SEARCH_9_PARAMETERS_MSMS_STANDARD_DEVIATION_value	0.01
RESULTS_SEARCH_9_PARAMETERS_FASTA_filename	C:\AB SCIEX\ProteinPilot Data\SearchDatabases\uniprot_Human_reviewed_20210202.fasta
RESULTS_SEARCH_9_PARAMETERS_AUTO_CALIBRATION_ms	TRUE
RESULTS_SEARCH_9_PARAMETERS_AUTO_CALIBRATION_msexport	FALSE
RESULTS_SEARCH_9_PARAMETERS_AUTO_CALIBRATION_msms	TRUE
RESULTS_SEARCH_9_PARAMETERS_AUTO_CALIBRATION_msmstolsdratio	2.75
RESULTS_SEARCH_9_PARAMETERS_AUTO_CALIBRATION_mstolsdratio	7
RESULTS_SEARCH_9_PARAMETERS_AUTO_CALIBRATION_squareroot	TRUE
RESULTS_SEARCH_9_PARAMETERS_AUTO_CALIBRATION_type	dalton
RESULTS_SEARCH_9_PARAMETERS_AUTO_CALIBRATION_MCP_d_s_s_f	0.0666667
RESULTS_SEARCH_9_PARAMETERS_AUTO_CALIBRATION_MCP_d_s_w_f	3
RESULTS_SEARCH_9_PARAMETERS_AUTO_CALIBRATION_MCP_m_f_r_mbc	200
RESULTS_SEARCH_9_PARAMETERS_AUTO_CALIBRATION_MCP_m_m_c	10
RESULTS_SEARCH_9_PARAMETERS_AUTO_CALIBRATION_MCP_m_m_f_s	0.25
RESULTS_SEARCH_9_PARAMETERS_AUTO_CALIBRATION_MCP_m_m_p_f	0.33
RESULTS_SEARCH_9_PARAMETERS_AUTO_CALIBRATION_MCP_m_m_p_rms_f	1
RESULTS_SEARCH_9_PARAMETERS_AUTO_CALIBRATION_MCP_m_p_t_f	1
RESULTS_SEARCH_9_PARAMETERS_AUTO_CALIBRATION_MCP_m_r_h_n_b	15
RESULTS_SEARCH_9_PARAMETERS_AUTO_CALIBRATION_MCP_m_z_n_s	99
RESULTS_SEARCH_9_PARAMETERS_AUTO_CALIBRATION_MCP_m_z_s_mn_f_r	0.0666667
RESULTS_SEARCH_9_PARAMETERS_AUTO_CALIBRATION_MCP_m_z_s_mx_f_r	0.1
RESULTS_SEARCH_9_PARAMETERS_MS_AUTO_CALIBRATION_OUT_avres	-7.96031e-09
RESULTS_SEARCH_9_PARAMETERS_MS_AUTO_CALIBRATION_OUT_c0	-0.000542782
RESULTS_SEARCH_9_PARAMETERS_MS_AUTO_CALIBRATION_OUT_c1minus1	2.22372e-05
RESULTS_SEARCH_9_PARAMETERS_MS_AUTO_CALIBRATION_OUT_c2	0
RESULTS_SEARCH_9_PARAMETERS_MS_AUTO_CALIBRATION_OUT_file	1
RESULTS_SEARCH_9_PARAMETERS_MS_AUTO_CALIBRATION_OUT_partnumber	5
RESULTS_SEARCH_9_PARAMETERS_MS_AUTO_CALIBRATION_OUT_polyorder	1
RESULTS_SEARCH_9_PARAMETERS_MS_AUTO_CALIBRATION_OUT_sample	1
RESULTS_SEARCH_9_PARAMETERS_MS_AUTO_CALIBRATION_OUT_squareroot	TRUE
RESULTS_SEARCH_9_PARAMETERS_MSMS_AUTO_CALIBRATION_OUT_avres	-1.90253e-07
RESULTS_SEARCH_9_PARAMETERS_MSMS_AUTO_CALIBRATION_OUT_c0	-0.00011025
RESULTS_SEARCH_9_PARAMETERS_MSMS_AUTO_CALIBRATION_OUT_c1minus1	6.93759e-06
RESULTS_SEARCH_9_PARAMETERS_MSMS_AUTO_CALIBRATION_OUT_c2	0
RESULTS_SEARCH_9_PARAMETERS_MSMS_AUTO_CALIBRATION_OUT_file	1
RESULTS_SEARCH_9_PARAMETERS_MSMS_AUTO_CALIBRATION_OUT_partnumber	5
RESULTS_SEARCH_9_PARAMETERS_MSMS_AUTO_CALIBRATION_OUT_polyorder	1
RESULTS_SEARCH_9_PARAMETERS_MSMS_AUTO_CALIBRATION_OUT_sample	1
RESULTS_SEARCH_9_PARAMETERS_MSMS_AUTO_CALIBRATION_OUT_squareroot	TRUE
RESULTS_SEARCH_9_PARAMETERS_MAX_PRECURSORS_FRAGLET	5
RESULTS_SEARCH_9_PARAMETERS_MAX_PRECURSORS_TAGLET	1
RESULTS_SEARCH_9_PARAMETERS_PRECURSORS_DR_FRAGLET	10
RESULTS_SEARCH_9_PARAMETERS_PRECURSORS_DR_TAGLET	3
RESULTS_SEARCH_9_PARAMETERS_DEFAULT_CHARGE_STATE_1_charge	2
RESULTS_SEARCH_9_PARAMETERS_DEFAULT_CHARGE_STATE_1_probability	1
RESULTS_SEARCH_9_PARAMETERS_DEFAULT_CHARGE_STATE_2_charge	3
RESULTS_SEARCH_9_PARAMETERS_DEFAULT_CHARGE_STATE_2_probability	1
RESULTS_SEARCH_9_PARAMETERS_DEFAULT_CHARGE_STATE_3_charge	4
RESULTS_SEARCH_9_PARAMETERS_DEFAULT_CHARGE_STATE_3_probability	1
RESULTS_SEARCH_9_PARAMETERS_VERSION	5.0.2.0, 5346
RESULTS_SEARCH_9_PARAMETERS_PARAGON_VERSION	5.0.2.0, 5174
RESULTS_SEARCH_9_PARAMETERS_APPLICATION	ProteinPilot(tm) Software
RESULTS_SEARCH_9_PARAMETERS_PROGROUP_alternativedispositionmaximumfoldprobabilitydrop	100
RESULTS_SEARCH_9_PARAMETERS_PROGROUP_alternativedispositionmaximumfoldscoredrop	2
RESULTS_SEARCH_9_PARAMETERS_PROGROUP_autodiscordantpeptidethreshold	07:12:00
RESULTS_SEARCH_9_PARAMETERS_PROGROUP_bayesconfidencecalclulation	TRUE
RESULTS_SEARCH_9_PARAMETERS_PROGROUP_calibrateconfidence	TRUE
RESULTS_SEARCH_9_PARAMETERS_PROGROUP_compresspeptides	FALSE
RESULTS_SEARCH_9_PARAMETERS_PROGROUP_confidencepercentthresholdforexcludingothersfromquant	1900-01-15
RESULTS_SEARCH_9_PARAMETERS_PROGROUP_confidencepercentthresholdforincludingselfinquant	15
RESULTS_SEARCH_9_PARAMETERS_PROGROUP_donotstoremspeaklists	FALSE
RESULTS_SEARCH_9_PARAMETERS_PROGROUP_fasta	C:\AB SCIEX\ProteinPilot Data\SearchDatabases\uniprot_Human_reviewed_20210202.fasta
RESULTS_SEARCH_9_PARAMETERS_PROGROUP_featuregroupminpepconf	0.66
RESULTS_SEARCH_9_PARAMETERS_PROGROUP_featuregroupminups	11:16:48
RESULTS_SEARCH_9_PARAMETERS_PROGROUP_focusingintersection	1900-01-04
RESULTS_SEARCH_9_PARAMETERS_PROGROUP_focusingminimummatchconfidence	0.1
RESULTS_SEARCH_9_PARAMETERS_PROGROUP_focusingminunusedprotscore	0.1
RESULTS_SEARCH_9_PARAMETERS_PROGROUP_focusingsubsetcutoff	6
RESULTS_SEARCH_9_PARAMETERS_PROGROUP_intersection	1.3
RESULTS_SEARCH_9_PARAMETERS_PROGROUP_minimummatchconfidencecutoff	0.001
RESULTS_SEARCH_9_PARAMETERS_PROGROUP_minunusedprotscore	0.0458
RESULTS_SEARCH_9_PARAMETERS_PROGROUP_subsetcutoff	2
RESULTS_SEARCH_9_PARAMETERS_PROGROUP_uniprotservicehttpssupported	TRUE
RESULTS_SEARCH_9_PARAMETERS_PROGROUP_unusedprotscorethresholdforexcludingothersfromquant	1.3
RESULTS_SEARCH_9_PARAMETERS_PEAKLIST_count	3724
RESULTS_SEARCH_9_PARAMETERS_PEAKLIST_filenumber	1
RESULTS_SEARCH_9_PARAMETERS_PEAKLIST_original_count	1910-03-12
RESULTS_SEARCH_9_PARAMETERS_PEAKLIST_originalfilename	C:\DATA\CC\GuoDanDan iTRAQ\??\sample1.wiff
RESULTS_SEARCH_9_PARAMETERS_PEAKLIST_partnumber	5
RESULTS_SEARCH_9_PARAMETERS_QUANT_TYPE_background_correction	FALSE
RESULTS_SEARCH_9_PARAMETERS_QUANT_TYPE_bias_correction	TRUE
RESULTS_SEARCH_9_PARAMETERS_QUANT_TYPE_data_type	MSMS
RESULTS_SEARCH_9_PARAMETERS_QUANT_TYPE_keep_extreme_peptides_over_fraction	0.15
RESULTS_SEARCH_9_PARAMETERS_QUANT_TYPE_low_confidence_check	TRUE
RESULTS_SEARCH_9_PARAMETERS_QUANT_TYPE_low_intensity_check	TRUE
RESULTS_SEARCH_9_PARAMETERS_QUANT_TYPE_median_statistic	FALSE
RESULTS_SEARCH_9_PARAMETERS_QUANT_TYPE_mod_check	TRUE
RESULTS_SEARCH_9_PARAMETERS_QUANT_TYPE_quant_threshold	-1
RESULTS_SEARCH_9_PARAMETERS_QUANT_TYPE_quant_threshold_sn	5
RESULTS_SEARCH_9_PARAMETERS_QUANT_TYPE_separate_searches	FALSE
RESULTS_SEARCH_9_PARAMETERS_QUANT_TYPE_shared_msms_check	TRUE
RESULTS_SEARCH_9_PARAMETERS_QUANT_TYPE_xml:id	iTRAQ8PLEX
RESULTS_SEARCH_9_PARAMETERS_QUANT_TYPE_QUANT_LABEL_display	113
RESULTS_SEARCH_9_PARAMETERS_QUANT_TYPE_QUANT_LABEL_name	IT113
RESULTS_SEARCH_9_PARAMETERS_QUANT_TYPE_QUANT_LABEL_used	TRUE
RESULTS_SEARCH_9_PARAMETERS_QUANT_TYPE_QUANT_LABEL_display	114
RESULTS_SEARCH_9_PARAMETERS_QUANT_TYPE_QUANT_LABEL_name	IT114
RESULTS_SEARCH_9_PARAMETERS_QUANT_TYPE_QUANT_LABEL_used	TRUE
RESULTS_SEARCH_9_PARAMETERS_QUANT_TYPE_QUANT_LABEL_display	115
RESULTS_SEARCH_9_PARAMETERS_QUANT_TYPE_QUANT_LABEL_name	IT115
RESULTS_SEARCH_9_PARAMETERS_QUANT_TYPE_QUANT_LABEL_used	TRUE
RESULTS_SEARCH_9_PARAMETERS_QUANT_TYPE_QUANT_LABEL_display	116
RESULTS_SEARCH_9_PARAMETERS_QUANT_TYPE_QUANT_LABEL_name	IT116
RESULTS_SEARCH_9_PARAMETERS_QUANT_TYPE_QUANT_LABEL_used	TRUE
RESULTS_SEARCH_9_PARAMETERS_QUANT_TYPE_QUANT_LABEL_display	117
RESULTS_SEARCH_9_PARAMETERS_QUANT_TYPE_QUANT_LABEL_name	IT117
RESULTS_SEARCH_9_PARAMETERS_QUANT_TYPE_QUANT_LABEL_used	TRUE
RESULTS_SEARCH_9_PARAMETERS_QUANT_TYPE_QUANT_LABEL_display	118
RESULTS_SEARCH_9_PARAMETERS_QUANT_TYPE_QUANT_LABEL_name	IT118
RESULTS_SEARCH_9_PARAMETERS_QUANT_TYPE_QUANT_LABEL_used	TRUE
RESULTS_SEARCH_9_PARAMETERS_QUANT_TYPE_QUANT_LABEL_display	119
RESULTS_SEARCH_9_PARAMETERS_QUANT_TYPE_QUANT_LABEL_name	IT119
RESULTS_SEARCH_9_PARAMETERS_QUANT_TYPE_QUANT_LABEL_used	TRUE
RESULTS_SEARCH_9_PARAMETERS_QUANT_TYPE_QUANT_LABEL_display	121
RESULTS_SEARCH_9_PARAMETERS_QUANT_TYPE_QUANT_LABEL_name	IT121
RESULTS_SEARCH_9_PARAMETERS_QUANT_TYPE_QUANT_LABEL_used	TRUE
RESULTS_SEARCH_9_PARAMETERS_PARAGON_METHOD_SETTINGS_UI_SAMPLE_TYPE	iTRAQ 8plex (Peptide Labeled)
RESULTS_SEARCH_9_PARAMETERS_PARAGON_METHOD_SETTINGS_UI_CYS_ALKYLATION	Iodoacetamide
RESULTS_SEARCH_9_PARAMETERS_PARAGON_METHOD_SETTINGS_UI_DIGESTION	Trypsin
RESULTS_SEARCH_9_PARAMETERS_PARAGON_METHOD_SETTINGS_UI_INSTRUMENT	TripleTOF 5600
RESULTS_SEARCH_9_PARAMETERS_PARAGON_METHOD_SETTINGS_UI_SPECIES	Homo sapiens
RESULTS_SEARCH_9_PARAMETERS_PARAGON_METHOD_SETTINGS_UI_SEARCH_EFFORT	Thorough
RESULTS_SEARCH_9_PARAMETERS_PARAGON_METHOD_SETTINGS_UI_ID_FOCUS	Biological modifications
RESULTS_SEARCH_9_PARAMETERS_PARAGON_METHOD_SETTINGS_UI_USER_NAME	Omics-PC\Omics
RESULTS_SEARCH_9_PARAMETERS_PARAGON_METHOD_SETTINGS_UI_QUANT_TYPE	iTRAQ8PLEX
RESULTS_SEARCH_9_PARAMETERS_PARAGON_METHOD_SETTINGS_UI_MACHINE_NAME	OMICS-PC
RESULTS_SEARCH_9_PARAMETERS_PARAGON_METHOD_SETTINGS_UI_SEARCH_ID	6.37479e+17
RESULTS_SEARCH_9_PARAMETERS_PARAGON_METHOD_SETTINGS_UI_START_TIME	2021-02-02 19:26:30
RESULTS_SEARCH_9_PARAMETERS_PARAGON_METHOD_SETTINGS_UI_MIN_UNUSED_PROTSCORE	0.0458
RESULTS_SEARCH_9_PARAMETERS_PARAGON_METHOD_SETTINGS_QUANT_LABEL_SETTING_minus1	0
RESULTS_SEARCH_9_PARAMETERS_PARAGON_METHOD_SETTINGS_QUANT_LABEL_SETTING_minus2	0
RESULTS_SEARCH_9_PARAMETERS_PARAGON_METHOD_SETTINGS_QUANT_LABEL_SETTING_plus1	6.89
RESULTS_SEARCH_9_PARAMETERS_PARAGON_METHOD_SETTINGS_QUANT_LABEL_SETTING_plus2	0.24
RESULTS_SEARCH_9_PARAMETERS_PARAGON_METHOD_SETTINGS_QUANT_LABEL_SETTING_reagent	iTRAQ113
RESULTS_SEARCH_9_PARAMETERS_PARAGON_METHOD_SETTINGS_QUANT_LABEL_SETTING_type	Not Used
RESULTS_SEARCH_9_PARAMETERS_PARAGON_METHOD_SETTINGS_QUANT_LABEL_SETTING_minus1	0.94
RESULTS_SEARCH_9_PARAMETERS_PARAGON_METHOD_SETTINGS_QUANT_LABEL_SETTING_minus2	0
RESULTS_SEARCH_9_PARAMETERS_PARAGON_METHOD_SETTINGS_QUANT_LABEL_SETTING_plus1	5.9
RESULTS_SEARCH_9_PARAMETERS_PARAGON_METHOD_SETTINGS_QUANT_LABEL_SETTING_plus2	0.16
RESULTS_SEARCH_9_PARAMETERS_PARAGON_METHOD_SETTINGS_QUANT_LABEL_SETTING_reagent	iTRAQ114
RESULTS_SEARCH_9_PARAMETERS_PARAGON_METHOD_SETTINGS_QUANT_LABEL_SETTING_type	Not Used
RESULTS_SEARCH_9_PARAMETERS_PARAGON_METHOD_SETTINGS_QUANT_LABEL_SETTING_minus1	1.88
RESULTS_SEARCH_9_PARAMETERS_PARAGON_METHOD_SETTINGS_QUANT_LABEL_SETTING_minus2	0
RESULTS_SEARCH_9_PARAMETERS_PARAGON_METHOD_SETTINGS_QUANT_LABEL_SETTING_plus1	4.9
RESULTS_SEARCH_9_PARAMETERS_PARAGON_METHOD_SETTINGS_QUANT_LABEL_SETTING_plus2	0.1
RESULTS_SEARCH_9_PARAMETERS_PARAGON_METHOD_SETTINGS_QUANT_LABEL_SETTING_reagent	iTRAQ115
RESULTS_SEARCH_9_PARAMETERS_PARAGON_METHOD_SETTINGS_QUANT_LABEL_SETTING_type	Not Used
RESULTS_SEARCH_9_PARAMETERS_PARAGON_METHOD_SETTINGS_QUANT_LABEL_SETTING_minus1	2.82
RESULTS_SEARCH_9_PARAMETERS_PARAGON_METHOD_SETTINGS_QUANT_LABEL_SETTING_minus2	0
RESULTS_SEARCH_9_PARAMETERS_PARAGON_METHOD_SETTINGS_QUANT_LABEL_SETTING_plus1	3.9
RESULTS_SEARCH_9_PARAMETERS_PARAGON_METHOD_SETTINGS_QUANT_LABEL_SETTING_plus2	0.07
RESULTS_SEARCH_9_PARAMETERS_PARAGON_METHOD_SETTINGS_QUANT_LABEL_SETTING_reagent	iTRAQ116
RESULTS_SEARCH_9_PARAMETERS_PARAGON_METHOD_SETTINGS_QUANT_LABEL_SETTING_type	Not Used
RESULTS_SEARCH_9_PARAMETERS_PARAGON_METHOD_SETTINGS_QUANT_LABEL_SETTING_minus1	3.77
RESULTS_SEARCH_9_PARAMETERS_PARAGON_METHOD_SETTINGS_QUANT_LABEL_SETTING_minus2	0.06
RESULTS_SEARCH_9_PARAMETERS_PARAGON_METHOD_SETTINGS_QUANT_LABEL_SETTING_plus1	2.88
RESULTS_SEARCH_9_PARAMETERS_PARAGON_METHOD_SETTINGS_QUANT_LABEL_SETTING_plus2	0
RESULTS_SEARCH_9_PARAMETERS_PARAGON_METHOD_SETTINGS_QUANT_LABEL_SETTING_reagent	iTRAQ117
RESULTS_SEARCH_9_PARAMETERS_PARAGON_METHOD_SETTINGS_QUANT_LABEL_SETTING_type	Not Used
RESULTS_SEARCH_9_PARAMETERS_PARAGON_METHOD_SETTINGS_QUANT_LABEL_SETTING_minus1	4.71
RESULTS_SEARCH_9_PARAMETERS_PARAGON_METHOD_SETTINGS_QUANT_LABEL_SETTING_minus2	0.09
RESULTS_SEARCH_9_PARAMETERS_PARAGON_METHOD_SETTINGS_QUANT_LABEL_SETTING_plus1	1.91
RESULTS_SEARCH_9_PARAMETERS_PARAGON_METHOD_SETTINGS_QUANT_LABEL_SETTING_plus2	0
RESULTS_SEARCH_9_PARAMETERS_PARAGON_METHOD_SETTINGS_QUANT_LABEL_SETTING_reagent	iTRAQ118
RESULTS_SEARCH_9_PARAMETERS_PARAGON_METHOD_SETTINGS_QUANT_LABEL_SETTING_type	Not Used
RESULTS_SEARCH_9_PARAMETERS_PARAGON_METHOD_SETTINGS_QUANT_LABEL_SETTING_minus1	5.66
RESULTS_SEARCH_9_PARAMETERS_PARAGON_METHOD_SETTINGS_QUANT_LABEL_SETTING_minus2	0.14
RESULTS_SEARCH_9_PARAMETERS_PARAGON_METHOD_SETTINGS_QUANT_LABEL_SETTING_plus1	0.87
RESULTS_SEARCH_9_PARAMETERS_PARAGON_METHOD_SETTINGS_QUANT_LABEL_SETTING_plus2	0
RESULTS_SEARCH_9_PARAMETERS_PARAGON_METHOD_SETTINGS_QUANT_LABEL_SETTING_reagent	iTRAQ119
RESULTS_SEARCH_9_PARAMETERS_PARAGON_METHOD_SETTINGS_QUANT_LABEL_SETTING_type	Not Used
RESULTS_SEARCH_9_PARAMETERS_PARAGON_METHOD_SETTINGS_QUANT_LABEL_SETTING_minus1	7.44
RESULTS_SEARCH_9_PARAMETERS_PARAGON_METHOD_SETTINGS_QUANT_LABEL_SETTING_minus2	0.27
RESULTS_SEARCH_9_PARAMETERS_PARAGON_METHOD_SETTINGS_QUANT_LABEL_SETTING_plus1	0.18
RESULTS_SEARCH_9_PARAMETERS_PARAGON_METHOD_SETTINGS_QUANT_LABEL_SETTING_plus2	0
RESULTS_SEARCH_9_PARAMETERS_PARAGON_METHOD_SETTINGS_QUANT_LABEL_SETTING_reagent	iTRAQ121
RESULTS_SEARCH_9_PARAMETERS_PARAGON_METHOD_SETTINGS_QUANT_LABEL_SETTING_type	Not Used
RESULTS_SEARCH_9_PARAMETERS_PARAGON_METHOD_SETTINGS_UI_PSPEP	TRUE
RESULTS_SEARCH_10_time_cpu	938595
RESULTS_SEARCH_10_time_duration	941440
RESULTS_SEARCH_10_version	5.0.2.5174
RESULTS_SEARCH_10_xml:id	SEARCH:2:637478907898508600_4
RESULTS_SEARCH_10_PARAMETERS_chemical_data_edited	FALSE
RESULTS_SEARCH_10_PARAMETERS_do_multiprecursor_search	TRUE
RESULTS_SEARCH_10_PARAMETERS_do_reverse_search	TRUE
RESULTS_SEARCH_10_PARAMETERS_max_quant_labels	35
RESULTS_SEARCH_10_PARAMETERS_maxresults	15
RESULTS_SEARCH_10_PARAMETERS_separate_searches	FALSE
RESULTS_SEARCH_10_PARAMETERS_MSTOLERANCE_type	dalton
RESULTS_SEARCH_10_PARAMETERS_MSTOLERANCE_value	0.05
RESULTS_SEARCH_10_PARAMETERS_MSMSTOLERANCE_type	dalton
RESULTS_SEARCH_10_PARAMETERS_MSMSTOLERANCE_value	0.1
RESULTS_SEARCH_10_PARAMETERS_MS_STANDARD_DEVIATION_type	dalton
RESULTS_SEARCH_10_PARAMETERS_MS_STANDARD_DEVIATION_value	0.0011
RESULTS_SEARCH_10_PARAMETERS_MSMS_STANDARD_DEVIATION_type	dalton
RESULTS_SEARCH_10_PARAMETERS_MSMS_STANDARD_DEVIATION_value	0.01
RESULTS_SEARCH_10_PARAMETERS_FASTA_filename	C:\AB SCIEX\ProteinPilot Data\SearchDatabases\uniprot_Human_reviewed_20210202.fasta
RESULTS_SEARCH_10_PARAMETERS_AUTO_CALIBRATION_ms	TRUE
RESULTS_SEARCH_10_PARAMETERS_AUTO_CALIBRATION_msexport	FALSE
RESULTS_SEARCH_10_PARAMETERS_AUTO_CALIBRATION_msms	TRUE
RESULTS_SEARCH_10_PARAMETERS_AUTO_CALIBRATION_msmstolsdratio	2.75
RESULTS_SEARCH_10_PARAMETERS_AUTO_CALIBRATION_mstolsdratio	7
RESULTS_SEARCH_10_PARAMETERS_AUTO_CALIBRATION_squareroot	TRUE
RESULTS_SEARCH_10_PARAMETERS_AUTO_CALIBRATION_type	dalton
RESULTS_SEARCH_10_PARAMETERS_AUTO_CALIBRATION_MCP_d_s_s_f	0.0666667
RESULTS_SEARCH_10_PARAMETERS_AUTO_CALIBRATION_MCP_d_s_w_f	3
RESULTS_SEARCH_10_PARAMETERS_AUTO_CALIBRATION_MCP_m_f_r_mbc	200
RESULTS_SEARCH_10_PARAMETERS_AUTO_CALIBRATION_MCP_m_m_c	10
RESULTS_SEARCH_10_PARAMETERS_AUTO_CALIBRATION_MCP_m_m_f_s	0.25
RESULTS_SEARCH_10_PARAMETERS_AUTO_CALIBRATION_MCP_m_m_p_f	0.33
RESULTS_SEARCH_10_PARAMETERS_AUTO_CALIBRATION_MCP_m_m_p_rms_f	1
RESULTS_SEARCH_10_PARAMETERS_AUTO_CALIBRATION_MCP_m_p_t_f	1
RESULTS_SEARCH_10_PARAMETERS_AUTO_CALIBRATION_MCP_m_r_h_n_b	15
RESULTS_SEARCH_10_PARAMETERS_AUTO_CALIBRATION_MCP_m_z_n_s	99
RESULTS_SEARCH_10_PARAMETERS_AUTO_CALIBRATION_MCP_m_z_s_mn_f_r	0.0666667
RESULTS_SEARCH_10_PARAMETERS_AUTO_CALIBRATION_MCP_m_z_s_mx_f_r	0.1
RESULTS_SEARCH_10_PARAMETERS_MS_AUTO_CALIBRATION_OUT_avres	-7.96031e-09
RESULTS_SEARCH_10_PARAMETERS_MS_AUTO_CALIBRATION_OUT_c0	-0.000542782
RESULTS_SEARCH_10_PARAMETERS_MS_AUTO_CALIBRATION_OUT_c1minus1	2.22372e-05
RESULTS_SEARCH_10_PARAMETERS_MS_AUTO_CALIBRATION_OUT_c2	0
RESULTS_SEARCH_10_PARAMETERS_MS_AUTO_CALIBRATION_OUT_file	1
RESULTS_SEARCH_10_PARAMETERS_MS_AUTO_CALIBRATION_OUT_partnumber	5
RESULTS_SEARCH_10_PARAMETERS_MS_AUTO_CALIBRATION_OUT_polyorder	1
RESULTS_SEARCH_10_PARAMETERS_MS_AUTO_CALIBRATION_OUT_sample	1
RESULTS_SEARCH_10_PARAMETERS_MS_AUTO_CALIBRATION_OUT_squareroot	TRUE
RESULTS_SEARCH_10_PARAMETERS_MSMS_AUTO_CALIBRATION_OUT_avres	-1.90253e-07
RESULTS_SEARCH_10_PARAMETERS_MSMS_AUTO_CALIBRATION_OUT_c0	-0.00011025
RESULTS_SEARCH_10_PARAMETERS_MSMS_AUTO_CALIBRATION_OUT_c1minus1	6.93759e-06
RESULTS_SEARCH_10_PARAMETERS_MSMS_AUTO_CALIBRATION_OUT_c2	0
RESULTS_SEARCH_10_PARAMETERS_MSMS_AUTO_CALIBRATION_OUT_file	1
RESULTS_SEARCH_10_PARAMETERS_MSMS_AUTO_CALIBRATION_OUT_partnumber	5
RESULTS_SEARCH_10_PARAMETERS_MSMS_AUTO_CALIBRATION_OUT_polyorder	1
RESULTS_SEARCH_10_PARAMETERS_MSMS_AUTO_CALIBRATION_OUT_sample	1
RESULTS_SEARCH_10_PARAMETERS_MSMS_AUTO_CALIBRATION_OUT_squareroot	TRUE
RESULTS_SEARCH_10_PARAMETERS_MAX_PRECURSORS_FRAGLET	5
RESULTS_SEARCH_10_PARAMETERS_MAX_PRECURSORS_TAGLET	1
RESULTS_SEARCH_10_PARAMETERS_PRECURSORS_DR_FRAGLET	10
RESULTS_SEARCH_10_PARAMETERS_PRECURSORS_DR_TAGLET	3
RESULTS_SEARCH_10_PARAMETERS_DEFAULT_CHARGE_STATE_1_charge	2
RESULTS_SEARCH_10_PARAMETERS_DEFAULT_CHARGE_STATE_1_probability	1
RESULTS_SEARCH_10_PARAMETERS_DEFAULT_CHARGE_STATE_2_charge	3
RESULTS_SEARCH_10_PARAMETERS_DEFAULT_CHARGE_STATE_2_probability	1
RESULTS_SEARCH_10_PARAMETERS_DEFAULT_CHARGE_STATE_3_charge	4
RESULTS_SEARCH_10_PARAMETERS_DEFAULT_CHARGE_STATE_3_probability	1
RESULTS_SEARCH_10_PARAMETERS_VERSION	5.0.2.0, 5346
RESULTS_SEARCH_10_PARAMETERS_PARAGON_VERSION	5.0.2.0, 5174
RESULTS_SEARCH_10_PARAMETERS_APPLICATION	ProteinPilot(tm) Software
RESULTS_SEARCH_10_PARAMETERS_PROGROUP_alternativedispositionmaximumfoldprobabilitydrop	100
RESULTS_SEARCH_10_PARAMETERS_PROGROUP_alternativedispositionmaximumfoldscoredrop	2
RESULTS_SEARCH_10_PARAMETERS_PROGROUP_autodiscordantpeptidethreshold	0.3
RESULTS_SEARCH_10_PARAMETERS_PROGROUP_bayesconfidencecalclulation	TRUE
RESULTS_SEARCH_10_PARAMETERS_PROGROUP_calibrateconfidence	TRUE
RESULTS_SEARCH_10_PARAMETERS_PROGROUP_compresspeptides	FALSE
RESULTS_SEARCH_10_PARAMETERS_PROGROUP_confidencepercentthresholdforexcludingothersfromquant	15
RESULTS_SEARCH_10_PARAMETERS_PROGROUP_confidencepercentthresholdforincludingselfinquant	15
RESULTS_SEARCH_10_PARAMETERS_PROGROUP_donotstoremspeaklists	FALSE
RESULTS_SEARCH_10_PARAMETERS_PROGROUP_fasta	C:\AB SCIEX\ProteinPilot Data\SearchDatabases\uniprot_Human_reviewed_20210202.fasta
RESULTS_SEARCH_10_PARAMETERS_PROGROUP_featuregroupminpepconf	0.66
RESULTS_SEARCH_10_PARAMETERS_PROGROUP_featuregroupminups	0.47
RESULTS_SEARCH_10_PARAMETERS_PROGROUP_focusingintersection	4
RESULTS_SEARCH_10_PARAMETERS_PROGROUP_focusingminimummatchconfidence	0.1
RESULTS_SEARCH_10_PARAMETERS_PROGROUP_focusingminunusedprotscore	02:24:00
RESULTS_SEARCH_10_PARAMETERS_PROGROUP_focusingsubsetcutoff	6
RESULTS_SEARCH_10_PARAMETERS_PROGROUP_intersection	1.3
RESULTS_SEARCH_10_PARAMETERS_PROGROUP_minimummatchconfidencecutoff	0.001
RESULTS_SEARCH_10_PARAMETERS_PROGROUP_minunusedprotscore	0.0458
RESULTS_SEARCH_10_PARAMETERS_PROGROUP_subsetcutoff	2
RESULTS_SEARCH_10_PARAMETERS_PROGROUP_uniprotservicehttpssupported	TRUE
RESULTS_SEARCH_10_PARAMETERS_PROGROUP_unusedprotscorethresholdforexcludingothersfromquant	1.3
RESULTS_SEARCH_10_PARAMETERS_PEAKLIST_count	3724
RESULTS_SEARCH_10_PARAMETERS_PEAKLIST_filenumber	1
RESULTS_SEARCH_10_PARAMETERS_PEAKLIST_original_count	3724
RESULTS_SEARCH_10_PARAMETERS_PEAKLIST_originalfilename	C:\DATA\CC\GuoDanDan iTRAQ\??\sample1.wiff
RESULTS_SEARCH_10_PARAMETERS_PEAKLIST_partnumber	5
RESULTS_SEARCH_10_PARAMETERS_QUANT_TYPE_background_correction	FALSE
RESULTS_SEARCH_10_PARAMETERS_QUANT_TYPE_bias_correction	TRUE
RESULTS_SEARCH_10_PARAMETERS_QUANT_TYPE_data_type	MSMS
RESULTS_SEARCH_10_PARAMETERS_QUANT_TYPE_keep_extreme_peptides_over_fraction	0.15
RESULTS_SEARCH_10_PARAMETERS_QUANT_TYPE_low_confidence_check	TRUE
RESULTS_SEARCH_10_PARAMETERS_QUANT_TYPE_low_intensity_check	TRUE
RESULTS_SEARCH_10_PARAMETERS_QUANT_TYPE_median_statistic	FALSE
RESULTS_SEARCH_10_PARAMETERS_QUANT_TYPE_mod_check	TRUE
RESULTS_SEARCH_10_PARAMETERS_QUANT_TYPE_quant_threshold	-1
RESULTS_SEARCH_10_PARAMETERS_QUANT_TYPE_quant_threshold_sn	5
RESULTS_SEARCH_10_PARAMETERS_QUANT_TYPE_separate_searches	FALSE
RESULTS_SEARCH_10_PARAMETERS_QUANT_TYPE_shared_msms_check	TRUE
RESULTS_SEARCH_10_PARAMETERS_QUANT_TYPE_xml:id	iTRAQ8PLEX
RESULTS_SEARCH_10_PARAMETERS_QUANT_TYPE_QUANT_LABEL_display	113
RESULTS_SEARCH_10_PARAMETERS_QUANT_TYPE_QUANT_LABEL_name	IT113
RESULTS_SEARCH_10_PARAMETERS_QUANT_TYPE_QUANT_LABEL_used	TRUE
RESULTS_SEARCH_10_PARAMETERS_QUANT_TYPE_QUANT_LABEL_display	114
RESULTS_SEARCH_10_PARAMETERS_QUANT_TYPE_QUANT_LABEL_name	IT114
RESULTS_SEARCH_10_PARAMETERS_QUANT_TYPE_QUANT_LABEL_used	TRUE
RESULTS_SEARCH_10_PARAMETERS_QUANT_TYPE_QUANT_LABEL_display	115
RESULTS_SEARCH_10_PARAMETERS_QUANT_TYPE_QUANT_LABEL_name	IT115
RESULTS_SEARCH_10_PARAMETERS_QUANT_TYPE_QUANT_LABEL_used	TRUE
RESULTS_SEARCH_10_PARAMETERS_QUANT_TYPE_QUANT_LABEL_display	116
RESULTS_SEARCH_10_PARAMETERS_QUANT_TYPE_QUANT_LABEL_name	IT116
RESULTS_SEARCH_10_PARAMETERS_QUANT_TYPE_QUANT_LABEL_used	TRUE
RESULTS_SEARCH_10_PARAMETERS_QUANT_TYPE_QUANT_LABEL_display	117
RESULTS_SEARCH_10_PARAMETERS_QUANT_TYPE_QUANT_LABEL_name	IT117
RESULTS_SEARCH_10_PARAMETERS_QUANT_TYPE_QUANT_LABEL_used	TRUE
RESULTS_SEARCH_10_PARAMETERS_QUANT_TYPE_QUANT_LABEL_display	118
RESULTS_SEARCH_10_PARAMETERS_QUANT_TYPE_QUANT_LABEL_name	IT118
RESULTS_SEARCH_10_PARAMETERS_QUANT_TYPE_QUANT_LABEL_used	TRUE
RESULTS_SEARCH_10_PARAMETERS_QUANT_TYPE_QUANT_LABEL_display	119
RESULTS_SEARCH_10_PARAMETERS_QUANT_TYPE_QUANT_LABEL_name	IT119
RESULTS_SEARCH_10_PARAMETERS_QUANT_TYPE_QUANT_LABEL_used	TRUE
RESULTS_SEARCH_10_PARAMETERS_QUANT_TYPE_QUANT_LABEL_display	121
RESULTS_SEARCH_10_PARAMETERS_QUANT_TYPE_QUANT_LABEL_name	IT121
RESULTS_SEARCH_10_PARAMETERS_QUANT_TYPE_QUANT_LABEL_used	TRUE
RESULTS_SEARCH_10_PARAMETERS_PARAGON_METHOD_SETTINGS_UI_SAMPLE_TYPE	iTRAQ 8plex (Peptide Labeled)
RESULTS_SEARCH_10_PARAMETERS_PARAGON_METHOD_SETTINGS_UI_CYS_ALKYLATION	Iodoacetamide
RESULTS_SEARCH_10_PARAMETERS_PARAGON_METHOD_SETTINGS_UI_DIGESTION	Trypsin
RESULTS_SEARCH_10_PARAMETERS_PARAGON_METHOD_SETTINGS_UI_INSTRUMENT	TripleTOF 5600
RESULTS_SEARCH_10_PARAMETERS_PARAGON_METHOD_SETTINGS_UI_SPECIES	Homo sapiens
RESULTS_SEARCH_10_PARAMETERS_PARAGON_METHOD_SETTINGS_UI_SEARCH_EFFORT	Thorough
RESULTS_SEARCH_10_PARAMETERS_PARAGON_METHOD_SETTINGS_UI_ID_FOCUS	Biological modifications
RESULTS_SEARCH_10_PARAMETERS_PARAGON_METHOD_SETTINGS_UI_USER_NAME	Omics-PC\Omics
RESULTS_SEARCH_10_PARAMETERS_PARAGON_METHOD_SETTINGS_UI_QUANT_TYPE	iTRAQ8PLEX
RESULTS_SEARCH_10_PARAMETERS_PARAGON_METHOD_SETTINGS_UI_MACHINE_NAME	OMICS-PC
RESULTS_SEARCH_10_PARAMETERS_PARAGON_METHOD_SETTINGS_UI_SEARCH_ID	6.37479e+17
RESULTS_SEARCH_10_PARAMETERS_PARAGON_METHOD_SETTINGS_UI_START_TIME	2021-02-02 19:26:30
RESULTS_SEARCH_10_PARAMETERS_PARAGON_METHOD_SETTINGS_UI_MIN_UNUSED_PROTSCORE	0.0458
RESULTS_SEARCH_10_PARAMETERS_PARAGON_METHOD_SETTINGS_QUANT_LABEL_SETTING_minus1	00:00:00
RESULTS_SEARCH_10_PARAMETERS_PARAGON_METHOD_SETTINGS_QUANT_LABEL_SETTING_minus2	0
RESULTS_SEARCH_10_PARAMETERS_PARAGON_METHOD_SETTINGS_QUANT_LABEL_SETTING_plus1	6.89
RESULTS_SEARCH_10_PARAMETERS_PARAGON_METHOD_SETTINGS_QUANT_LABEL_SETTING_plus2	0.24
RESULTS_SEARCH_10_PARAMETERS_PARAGON_METHOD_SETTINGS_QUANT_LABEL_SETTING_reagent	iTRAQ113
RESULTS_SEARCH_10_PARAMETERS_PARAGON_METHOD_SETTINGS_QUANT_LABEL_SETTING_type	Not Used
RESULTS_SEARCH_10_PARAMETERS_PARAGON_METHOD_SETTINGS_QUANT_LABEL_SETTING_minus1	0.94
RESULTS_SEARCH_10_PARAMETERS_PARAGON_METHOD_SETTINGS_QUANT_LABEL_SETTING_minus2	0
RESULTS_SEARCH_10_PARAMETERS_PARAGON_METHOD_SETTINGS_QUANT_LABEL_SETTING_plus1	5.9
RESULTS_SEARCH_10_PARAMETERS_PARAGON_METHOD_SETTINGS_QUANT_LABEL_SETTING_plus2	0.16
RESULTS_SEARCH_10_PARAMETERS_PARAGON_METHOD_SETTINGS_QUANT_LABEL_SETTING_reagent	iTRAQ114
RESULTS_SEARCH_10_PARAMETERS_PARAGON_METHOD_SETTINGS_QUANT_LABEL_SETTING_type	Not Used
RESULTS_SEARCH_10_PARAMETERS_PARAGON_METHOD_SETTINGS_QUANT_LABEL_SETTING_minus1	1.88
RESULTS_SEARCH_10_PARAMETERS_PARAGON_METHOD_SETTINGS_QUANT_LABEL_SETTING_minus2	0
RESULTS_SEARCH_10_PARAMETERS_PARAGON_METHOD_SETTINGS_QUANT_LABEL_SETTING_plus1	4.9
RESULTS_SEARCH_10_PARAMETERS_PARAGON_METHOD_SETTINGS_QUANT_LABEL_SETTING_plus2	0.1
RESULTS_SEARCH_10_PARAMETERS_PARAGON_METHOD_SETTINGS_QUANT_LABEL_SETTING_reagent	iTRAQ115
RESULTS_SEARCH_10_PARAMETERS_PARAGON_METHOD_SETTINGS_QUANT_LABEL_SETTING_type	Not Used
RESULTS_SEARCH_10_PARAMETERS_PARAGON_METHOD_SETTINGS_QUANT_LABEL_SETTING_minus1	2.82
RESULTS_SEARCH_10_PARAMETERS_PARAGON_METHOD_SETTINGS_QUANT_LABEL_SETTING_minus2	0
RESULTS_SEARCH_10_PARAMETERS_PARAGON_METHOD_SETTINGS_QUANT_LABEL_SETTING_plus1	3.9
RESULTS_SEARCH_10_PARAMETERS_PARAGON_METHOD_SETTINGS_QUANT_LABEL_SETTING_plus2	0.07
RESULTS_SEARCH_10_PARAMETERS_PARAGON_METHOD_SETTINGS_QUANT_LABEL_SETTING_reagent	iTRAQ116
RESULTS_SEARCH_10_PARAMETERS_PARAGON_METHOD_SETTINGS_QUANT_LABEL_SETTING_type	Not Used
RESULTS_SEARCH_10_PARAMETERS_PARAGON_METHOD_SETTINGS_QUANT_LABEL_SETTING_minus1	3.77
RESULTS_SEARCH_10_PARAMETERS_PARAGON_METHOD_SETTINGS_QUANT_LABEL_SETTING_minus2	0.06
RESULTS_SEARCH_10_PARAMETERS_PARAGON_METHOD_SETTINGS_QUANT_LABEL_SETTING_plus1	2.88
RESULTS_SEARCH_10_PARAMETERS_PARAGON_METHOD_SETTINGS_QUANT_LABEL_SETTING_plus2	0
RESULTS_SEARCH_10_PARAMETERS_PARAGON_METHOD_SETTINGS_QUANT_LABEL_SETTING_reagent	iTRAQ117
RESULTS_SEARCH_10_PARAMETERS_PARAGON_METHOD_SETTINGS_QUANT_LABEL_SETTING_type	Not Used
RESULTS_SEARCH_10_PARAMETERS_PARAGON_METHOD_SETTINGS_QUANT_LABEL_SETTING_minus1	4.71
RESULTS_SEARCH_10_PARAMETERS_PARAGON_METHOD_SETTINGS_QUANT_LABEL_SETTING_minus2	0.09
RESULTS_SEARCH_10_PARAMETERS_PARAGON_METHOD_SETTINGS_QUANT_LABEL_SETTING_plus1	1900-01-01 21:50:24
RESULTS_SEARCH_10_PARAMETERS_PARAGON_METHOD_SETTINGS_QUANT_LABEL_SETTING_plus2	0
RESULTS_SEARCH_10_PARAMETERS_PARAGON_METHOD_SETTINGS_QUANT_LABEL_SETTING_reagent	iTRAQ118
RESULTS_SEARCH_10_PARAMETERS_PARAGON_METHOD_SETTINGS_QUANT_LABEL_SETTING_type	Not Used
RESULTS_SEARCH_10_PARAMETERS_PARAGON_METHOD_SETTINGS_QUANT_LABEL_SETTING_minus1	5.66
RESULTS_SEARCH_10_PARAMETERS_PARAGON_METHOD_SETTINGS_QUANT_LABEL_SETTING_minus2	0.14
RESULTS_SEARCH_10_PARAMETERS_PARAGON_METHOD_SETTINGS_QUANT_LABEL_SETTING_plus1	0.87
RESULTS_SEARCH_10_PARAMETERS_PARAGON_METHOD_SETTINGS_QUANT_LABEL_SETTING_plus2	0
RESULTS_SEARCH_10_PARAMETERS_PARAGON_METHOD_SETTINGS_QUANT_LABEL_SETTING_reagent	iTRAQ119
RESULTS_SEARCH_10_PARAMETERS_PARAGON_METHOD_SETTINGS_QUANT_LABEL_SETTING_type	Not Used
RESULTS_SEARCH_10_PARAMETERS_PARAGON_METHOD_SETTINGS_QUANT_LABEL_SETTING_minus1	7.44
RESULTS_SEARCH_10_PARAMETERS_PARAGON_METHOD_SETTINGS_QUANT_LABEL_SETTING_minus2	0.27
RESULTS_SEARCH_10_PARAMETERS_PARAGON_METHOD_SETTINGS_QUANT_LABEL_SETTING_plus1	0.18
RESULTS_SEARCH_10_PARAMETERS_PARAGON_METHOD_SETTINGS_QUANT_LABEL_SETTING_plus2	0
RESULTS_SEARCH_10_PARAMETERS_PARAGON_METHOD_SETTINGS_QUANT_LABEL_SETTING_reagent	iTRAQ121
RESULTS_SEARCH_10_PARAMETERS_PARAGON_METHOD_SETTINGS_QUANT_LABEL_SETTING_type	Not Used
RESULTS_SEARCH_10_PARAMETERS_PARAGON_METHOD_SETTINGS_UI_PSPEP	TRUE
RESULTS_SEARCH_11_time_cpu	70434
RESULTS_SEARCH_11_time_duration	70461
RESULTS_SEARCH_11_version	5.0.2.5174
RESULTS_SEARCH_11_xml:id	SEARCH:1:637478907898508600_5
RESULTS_SEARCH_11_PARAMETERS_chemical_data_edited	FALSE
RESULTS_SEARCH_11_PARAMETERS_do_multiprecursor_search	TRUE
RESULTS_SEARCH_11_PARAMETERS_do_reverse_search	TRUE
RESULTS_SEARCH_11_PARAMETERS_max_quant_labels	35
RESULTS_SEARCH_11_PARAMETERS_maxresults	15
RESULTS_SEARCH_11_PARAMETERS_separate_searches	FALSE
[truncated: 24,080 more rows]

## Sheet: Metadata Calculations
	Subsearch	Search string	present		File index down	Part number	Spectra - 'original'	Spectra 'count' - non-empty?	max original Spectra for part	Max non-empty spectra for part	File Index for first only
	1	RESULTS_SEARCH_1_PARAMETERS_PEAKLIST_rawdatafilename		C:\DATA\CC\GuoDanDan iTRAQ\??\sample1.wiff	1	1	3728	3728	3728	3728	1
	2	RESULTS_SEARCH_2_PARAMETERS_PEAKLIST_rawdatafilename		C:\DATA\CC\GuoDanDan iTRAQ\??\sample1.wiff	1	1	3728	3728
	3	RESULTS_SEARCH_3_PARAMETERS_PEAKLIST_rawdatafilename		C:\DATA\CC\GuoDanDan iTRAQ\??\sample1.wiff	1	2	3730	3730	3730	3730
1 if Rapid, 2 if Thor	4	RESULTS_SEARCH_4_PARAMETERS_PEAKLIST_rawdatafilename		C:\DATA\CC\GuoDanDan iTRAQ\??\sample1.wiff	1	2	3730	3730
2	5	RESULTS_SEARCH_5_PARAMETERS_PEAKLIST_rawdatafilename		C:\DATA\CC\GuoDanDan iTRAQ\??\sample1.wiff	1	3	3727	3727	3727	3727
	6	RESULTS_SEARCH_6_PARAMETERS_PEAKLIST_rawdatafilename		C:\DATA\CC\GuoDanDan iTRAQ\??\sample1.wiff	1	3	3727	3727
# Segments	7	RESULTS_SEARCH_7_PARAMETERS_PEAKLIST_rawdatafilename		C:\DATA\CC\GuoDanDan iTRAQ\??\sample1.wiff	1	4	3729	3729	3729	3729
132	8	RESULTS_SEARCH_8_PARAMETERS_PEAKLIST_rawdatafilename		C:\DATA\CC\GuoDanDan iTRAQ\??\sample1.wiff	1	4	3729	3729
(max is 1000 segments)	9	RESULTS_SEARCH_9_PARAMETERS_PEAKLIST_rawdatafilename		C:\DATA\CC\GuoDanDan iTRAQ\??\sample1.wiff	1	5	3724	3724	3724	3724
	10	RESULTS_SEARCH_10_PARAMETERS_PEAKLIST_rawdatafilename		C:\DATA\CC\GuoDanDan iTRAQ\??\sample1.wiff	1	5	3724	3724
	11	RESULTS_SEARCH_11_PARAMETERS_PEAKLIST_rawdatafilename		C:\DATA\CC\GuoDanDan iTRAQ\??\sample2.wiff	2	6	3934	3934	3934	3934	2
	12	RESULTS_SEARCH_12_PARAMETERS_PEAKLIST_rawdatafilename		C:\DATA\CC\GuoDanDan iTRAQ\??\sample2.wiff	2	6	3934	3934
	13	RESULTS_SEARCH_13_PARAMETERS_PEAKLIST_rawdatafilename		C:\DATA\CC\GuoDanDan iTRAQ\??\sample2.wiff	2	7	3936	3936	3936	3936
	14	RESULTS_SEARCH_14_PARAMETERS_PEAKLIST_rawdatafilename		C:\DATA\CC\GuoDanDan iTRAQ\??\sample2.wiff	2	7	3936	3936
	15	RESULTS_SEARCH_15_PARAMETERS_PEAKLIST_rawdatafilename		C:\DATA\CC\GuoDanDan iTRAQ\??\sample2.wiff	2	8	3939	3939	3939	3939
	16	RESULTS_SEARCH_16_PARAMETERS_PEAKLIST_rawdatafilename		C:\DATA\CC\GuoDanDan iTRAQ\??\sample2.wiff	2	8	3939	3939
	17	RESULTS_SEARCH_17_PARAMETERS_PEAKLIST_rawdatafilename		C:\DATA\CC\GuoDanDan iTRAQ\??\sample2.wiff	2	9	3925	3925	3925	3925
	18	RESULTS_SEARCH_18_PARAMETERS_PEAKLIST_rawdatafilename		C:\DATA\CC\GuoDanDan iTRAQ\??\sample2.wiff	2	9	3925	3925
	19	RESULTS_SEARCH_19_PARAMETERS_PEAKLIST_rawdatafilename		C:\DATA\CC\GuoDanDan iTRAQ\??\sample2.wiff	2	10	3929	3929	3929	3929
	20	RESULTS_SEARCH_20_PARAMETERS_PEAKLIST_rawdatafilename		C:\DATA\CC\GuoDanDan iTRAQ\??\sample2.wiff	2	10	3929	3929
	21	RESULTS_SEARCH_21_PARAMETERS_PEAKLIST_rawdatafilename		C:\DATA\CC\GuoDanDan iTRAQ\??\sample3.wiff	3	11	3519	3519	3519	3519	3
	22	RESULTS_SEARCH_22_PARAMETERS_PEAKLIST_rawdatafilename		C:\DATA\CC\GuoDanDan iTRAQ\??\sample3.wiff	3	11	3519	3519
	23	RESULTS_SEARCH_23_PARAMETERS_PEAKLIST_rawdatafilename		C:\DATA\CC\GuoDanDan iTRAQ\??\sample3.wiff	3	12	3519	3519	3519	3519
	24	RESULTS_SEARCH_24_PARAMETERS_PEAKLIST_rawdatafilename		C:\DATA\CC\GuoDanDan iTRAQ\??\sample3.wiff	3	12	3519	3519
	25	RESULTS_SEARCH_25_PARAMETERS_PEAKLIST_rawdatafilename		C:\DATA\CC\GuoDanDan iTRAQ\??\sample3.wiff	3	13	3513	3513	3513	3513
	26	RESULTS_SEARCH_26_PARAMETERS_PEAKLIST_rawdatafilename		C:\DATA\CC\GuoDanDan iTRAQ\??\sample3.wiff	3	13	3513	3513
	27	RESULTS_SEARCH_27_PARAMETERS_PEAKLIST_rawdatafilename		C:\DATA\CC\GuoDanDan iTRAQ\??\sample3.wiff	3	14	3525	3525	3525	3525
	28	RESULTS_SEARCH_28_PARAMETERS_PEAKLIST_rawdatafilename		C:\DATA\CC\GuoDanDan iTRAQ\??\sample3.wiff	3	14	3525	3525
	29	RESULTS_SEARCH_29_PARAMETERS_PEAKLIST_rawdatafilename		C:\DATA\CC\GuoDanDan iTRAQ\??\sample3.wiff	3	15	3516	3516	3516	3516
	30	RESULTS_SEARCH_30_PARAMETERS_PEAKLIST_rawdatafilename		C:\DATA\CC\GuoDanDan iTRAQ\??\sample3.wiff	3	15	3516	3516
	31	RESULTS_SEARCH_31_PARAMETERS_PEAKLIST_rawdatafilename		C:\DATA\CC\GuoDanDan iTRAQ\??\sample3.wiff	3	16	3504	3504	3504	3504
	32	RESULTS_SEARCH_32_PARAMETERS_PEAKLIST_rawdatafilename		C:\DATA\CC\GuoDanDan iTRAQ\??\sample3.wiff	3	16	3504	3504
	33	RESULTS_SEARCH_33_PARAMETERS_PEAKLIST_rawdatafilename		C:\DATA\CC\GuoDanDan iTRAQ\??\sample4.wiff	4	17	3142	3142	3142	3142	4
	34	RESULTS_SEARCH_34_PARAMETERS_PEAKLIST_rawdatafilename		C:\DATA\CC\GuoDanDan iTRAQ\??\sample4.wiff	4	17	3142	3142
	35	RESULTS_SEARCH_35_PARAMETERS_PEAKLIST_rawdatafilename		C:\DATA\CC\GuoDanDan iTRAQ\??\sample4.wiff	4	18	3141	3141	3141	3141
	36	RESULTS_SEARCH_36_PARAMETERS_PEAKLIST_rawdatafilename		C:\DATA\CC\GuoDanDan iTRAQ\??\sample4.wiff	4	18	3141	3141
	37	RESULTS_SEARCH_37_PARAMETERS_PEAKLIST_rawdatafilename		C:\DATA\CC\GuoDanDan iTRAQ\??\sample5.wiff	5	19	3760	3760	3760	3760	5
	38	RESULTS_SEARCH_38_PARAMETERS_PEAKLIST_rawdatafilename		C:\DATA\CC\GuoDanDan iTRAQ\??\sample5.wiff	5	19	3760	3760
	39	RESULTS_SEARCH_39_PARAMETERS_PEAKLIST_rawdatafilename		C:\DATA\CC\GuoDanDan iTRAQ\??\sample5.wiff	5	20	3757	3757	3757	3757
	40	RESULTS_SEARCH_40_PARAMETERS_PEAKLIST_rawdatafilename		C:\DATA\CC\GuoDanDan iTRAQ\??\sample5.wiff	5	20	3757	3757
	41	RESULTS_SEARCH_41_PARAMETERS_PEAKLIST_rawdatafilename		C:\DATA\CC\GuoDanDan iTRAQ\??\sample5.wiff	5	21	3761	3761	3761	3761
	42	RESULTS_SEARCH_42_PARAMETERS_PEAKLIST_rawdatafilename		C:\DATA\CC\GuoDanDan iTRAQ\??\sample5.wiff	5	21	3761	3761
	43	RESULTS_SEARCH_43_PARAMETERS_PEAKLIST_rawdatafilename		C:\DATA\CC\GuoDanDan iTRAQ\??\sample5.wiff	5	22	3739	3739	3739	3739
	44	RESULTS_SEARCH_44_PARAMETERS_PEAKLIST_rawdatafilename		C:\DATA\CC\GuoDanDan iTRAQ\??\sample5.wiff	5	22	3739	3739
	45	RESULTS_SEARCH_45_PARAMETERS_PEAKLIST_rawdatafilename		C:\DATA\CC\GuoDanDan iTRAQ\??\sample5.wiff	5	23	3771	3771	3771	3771
	46	RESULTS_SEARCH_46_PARAMETERS_PEAKLIST_rawdatafilename		C:\DATA\CC\GuoDanDan iTRAQ\??\sample5.wiff	5	23	3771	3771
	47	RESULTS_SEARCH_47_PARAMETERS_PEAKLIST_rawdatafilename		C:\DATA\CC\GuoDanDan iTRAQ\??\sample5.wiff	5	24	3734	3734	3734	3734
	48	RESULTS_SEARCH_48_PARAMETERS_PEAKLIST_rawdatafilename		C:\DATA\CC\GuoDanDan iTRAQ\??\sample5.wiff	5	24	3734	3734
	49	RESULTS_SEARCH_49_PARAMETERS_PEAKLIST_rawdatafilename		C:\DATA\CC\GuoDanDan iTRAQ\??\sample6.wiff	6	25	3618	3618	3618	3618	6
	50	RESULTS_SEARCH_50_PARAMETERS_PEAKLIST_rawdatafilename		C:\DATA\CC\GuoDanDan iTRAQ\??\sample6.wiff	6	25	3618	3618
	51	RESULTS_SEARCH_51_PARAMETERS_PEAKLIST_rawdatafilename		C:\DATA\CC\GuoDanDan iTRAQ\??\sample6.wiff	6	26	3597	3597	3597	3597
	52	RESULTS_SEARCH_52_PARAMETERS_PEAKLIST_rawdatafilename		C:\DATA\CC\GuoDanDan iTRAQ\??\sample6.wiff	6	26	3597	3597
	53	RESULTS_SEARCH_53_PARAMETERS_PEAKLIST_rawdatafilename		C:\DATA\CC\GuoDanDan iTRAQ\??\sample6.wiff	6	27	3620	3620	3620	3620
	54	RESULTS_SEARCH_54_PARAMETERS_PEAKLIST_rawdatafilename		C:\DATA\CC\GuoDanDan iTRAQ\??\sample6.wiff	6	27	3620	3620
	55	RESULTS_SEARCH_55_PARAMETERS_PEAKLIST_rawdatafilename		C:\DATA\CC\GuoDanDan iTRAQ\??\sample6.wiff	6	28	3608	3608	3608	3608
	56	RESULTS_SEARCH_56_PARAMETERS_PEAKLIST_rawdatafilename		C:\DATA\CC\GuoDanDan iTRAQ\??\sample6.wiff	6	28	3608	3608
	57	RESULTS_SEARCH_57_PARAMETERS_PEAKLIST_rawdatafilename		C:\DATA\CC\GuoDanDan iTRAQ\??\sample6.wiff	6	29	3594	3594	3594	3594
	58	RESULTS_SEARCH_58_PARAMETERS_PEAKLIST_rawdatafilename		C:\DATA\CC\GuoDanDan iTRAQ\??\sample6.wiff	6	29	3594	3594
	59	RESULTS_SEARCH_59_PARAMETERS_PEAKLIST_rawdatafilename		C:\DATA\CC\GuoDanDan iTRAQ\??\sample6.wiff	6	30	3600	3600	3600	3600
	60	RESULTS_SEARCH_60_PARAMETERS_PEAKLIST_rawdatafilename		C:\DATA\CC\GuoDanDan iTRAQ\??\sample6.wiff	6	30	3600	3600
	61	RESULTS_SEARCH_61_PARAMETERS_PEAKLIST_rawdatafilename		C:\DATA\CC\GuoDanDan iTRAQ\??\sample7.wiff	7	31	3870	3870	3870	3870	7
	62	RESULTS_SEARCH_62_PARAMETERS_PEAKLIST_rawdatafilename		C:\DATA\CC\GuoDanDan iTRAQ\??\sample7.wiff	7	31	3870	3870
	63	RESULTS_SEARCH_63_PARAMETERS_PEAKLIST_rawdatafilename		C:\DATA\CC\GuoDanDan iTRAQ\??\sample7.wiff	7	32	3848	3848	3848	3848
	64	RESULTS_SEARCH_64_PARAMETERS_PEAKLIST_rawdatafilename		C:\DATA\CC\GuoDanDan iTRAQ\??\sample7.wiff	7	32	3848	3848
	65	RESULTS_SEARCH_65_PARAMETERS_PEAKLIST_rawdatafilename		C:\DATA\CC\GuoDanDan iTRAQ\??\sample7.wiff	7	33	3859	3859	3859	3859
	66	RESULTS_SEARCH_66_PARAMETERS_PEAKLIST_rawdatafilename		C:\DATA\CC\GuoDanDan iTRAQ\??\sample7.wiff	7	33	3859	3859
	67	RESULTS_SEARCH_67_PARAMETERS_PEAKLIST_rawdatafilename		C:\DATA\CC\GuoDanDan iTRAQ\??\sample7.wiff	7	34	3873	3873	3873	3873
	68	RESULTS_SEARCH_68_PARAMETERS_PEAKLIST_rawdatafilename		C:\DATA\CC\GuoDanDan iTRAQ\??\sample7.wiff	7	34	3873	3873
	69	RESULTS_SEARCH_69_PARAMETERS_PEAKLIST_rawdatafilename		C:\DATA\CC\GuoDanDan iTRAQ\??\sample7.wiff	7	35	3844	3844	3844	3844
	70	RESULTS_SEARCH_70_PARAMETERS_PEAKLIST_rawdatafilename		C:\DATA\CC\GuoDanDan iTRAQ\??\sample7.wiff	7	35	3844	3844
	71	RESULTS_SEARCH_71_PARAMETERS_PEAKLIST_rawdatafilename		C:\DATA\CC\GuoDanDan iTRAQ\??\sample7.wiff	7	36	3853	3853	3853	3853
	72	RESULTS_SEARCH_72_PARAMETERS_PEAKLIST_rawdatafilename		C:\DATA\CC\GuoDanDan iTRAQ\??\sample7.wiff	7	36	3853	3853
	73	RESULTS_SEARCH_73_PARAMETERS_PEAKLIST_rawdatafilename		C:\DATA\CC\GuoDanDan iTRAQ\??\sample8.wiff	8	37	3804	3804	3804	3804	8
	74	RESULTS_SEARCH_74_PARAMETERS_PEAKLIST_rawdatafilename		C:\DATA\CC\GuoDanDan iTRAQ\??\sample8.wiff	8	37	3804	3804
	75	RESULTS_SEARCH_75_PARAMETERS_PEAKLIST_rawdatafilename		C:\DATA\CC\GuoDanDan iTRAQ\??\sample8.wiff	8	38	3786	3786	3786	3786
	76	RESULTS_SEARCH_76_PARAMETERS_PEAKLIST_rawdatafilename		C:\DATA\CC\GuoDanDan iTRAQ\??\sample8.wiff	8	38	3786	3786
	77	RESULTS_SEARCH_77_PARAMETERS_PEAKLIST_rawdatafilename		C:\DATA\CC\GuoDanDan iTRAQ\??\sample8.wiff	8	39	3805	3805	3805	3805
	78	RESULTS_SEARCH_78_PARAMETERS_PEAKLIST_rawdatafilename		C:\DATA\CC\GuoDanDan iTRAQ\??\sample8.wiff	8	39	3805	3805
	79	RESULTS_SEARCH_79_PARAMETERS_PEAKLIST_rawdatafilename		C:\DATA\CC\GuoDanDan iTRAQ\??\sample8.wiff	8	40	3785	3785	3785	3785
	80	RESULTS_SEARCH_80_PARAMETERS_PEAKLIST_rawdatafilename		C:\DATA\CC\GuoDanDan iTRAQ\??\sample8.wiff	8	40	3785	3785
	81	RESULTS_SEARCH_81_PARAMETERS_PEAKLIST_rawdatafilename		C:\DATA\CC\GuoDanDan iTRAQ\??\sample8.wiff	8	41	3792	3792	3792	3792
	82	RESULTS_SEARCH_82_PARAMETERS_PEAKLIST_rawdatafilename		C:\DATA\CC\GuoDanDan iTRAQ\??\sample8.wiff	8	41	3792	3792
	83	RESULTS_SEARCH_83_PARAMETERS_PEAKLIST_rawdatafilename		C:\DATA\CC\GuoDanDan iTRAQ\??\sample8.wiff	8	42	3792	3792	3792	3792
	84	RESULTS_SEARCH_84_PARAMETERS_PEAKLIST_rawdatafilename		C:\DATA\CC\GuoDanDan iTRAQ\??\sample8.wiff	8	42	3792	3792
	85	RESULTS_SEARCH_85_PARAMETERS_PEAKLIST_rawdatafilename		C:\DATA\CC\GuoDanDan iTRAQ\??\sample9.wiff	9	43	3995	3995	3995	3995	9
	86	RESULTS_SEARCH_86_PARAMETERS_PEAKLIST_rawdatafilename		C:\DATA\CC\GuoDanDan iTRAQ\??\sample9.wiff	9	43	3995	3995
	87	RESULTS_SEARCH_87_PARAMETERS_PEAKLIST_rawdatafilename		C:\DATA\CC\GuoDanDan iTRAQ\??\sample9.wiff	9	44	4002	4002	4002	4002
	88	RESULTS_SEARCH_88_PARAMETERS_PEAKLIST_rawdatafilename		C:\DATA\CC\GuoDanDan iTRAQ\??\sample9.wiff	9	44	4002	4002
	89	RESULTS_SEARCH_89_PARAMETERS_PEAKLIST_rawdatafilename		C:\DATA\CC\GuoDanDan iTRAQ\??\sample9.wiff	9	45	3988	3988	3988	3988
	90	RESULTS_SEARCH_90_PARAMETERS_PEAKLIST_rawdatafilename		C:\DATA\CC\GuoDanDan iTRAQ\??\sample9.wiff	9	45	3988	3988
	91	RESULTS_SEARCH_91_PARAMETERS_PEAKLIST_rawdatafilename		C:\DATA\CC\GuoDanDan iTRAQ\??\sample9.wiff	9	46	4007	4007	4007	4007
	92	RESULTS_SEARCH_92_PARAMETERS_PEAKLIST_rawdatafilename		C:\DATA\CC\GuoDanDan iTRAQ\??\sample9.wiff	9	46	4007	4007
	93	RESULTS_SEARCH_93_PARAMETERS_PEAKLIST_rawdatafilename		C:\DATA\CC\GuoDanDan iTRAQ\??\sample9.wiff	9	47	3995	3995	3995	3995
	94	RESULTS_SEARCH_94_PARAMETERS_PEAKLIST_rawdatafilename		C:\DATA\CC\GuoDanDan iTRAQ\??\sample9.wiff	9	47	3995	3995
	95	RESULTS_SEARCH_95_PARAMETERS_PEAKLIST_rawdatafilename		C:\DATA\CC\GuoDanDan iTRAQ\??\sample9.wiff	9	48	3981	3981	3981	3981
	96	RESULTS_SEARCH_96_PARAMETERS_PEAKLIST_rawdatafilename		C:\DATA\CC\GuoDanDan iTRAQ\??\sample9.wiff	9	48	3981	3981
	97	RESULTS_SEARCH_97_PARAMETERS_PEAKLIST_rawdatafilename		C:\DATA\CC\GuoDanDan iTRAQ\??\sample10.wiff	10	49	3870	3870	3870	3870	10
	98	RESULTS_SEARCH_98_PARAMETERS_PEAKLIST_rawdatafilename		C:\DATA\CC\GuoDanDan iTRAQ\??\sample10.wiff	10	49	3870	3870
	99	RESULTS_SEARCH_99_PARAMETERS_PEAKLIST_rawdatafilename		C:\DATA\CC\GuoDanDan iTRAQ\??\sample10.wiff	10	50	3848	3848	3848	3848
	100	RESULTS_SEARCH_100_PARAMETERS_PEAKLIST_rawdatafilename		C:\DATA\CC\GuoDanDan iTRAQ\??\sample10.wiff	10	50	3848	3848
	101	RESULTS_SEARCH_101_PARAMETERS_PEAKLIST_rawdatafilename		C:\DATA\CC\GuoDanDan iTRAQ\??\sample10.wiff	10	51	3846	3846	3846	3846
	102	RESULTS_SEARCH_102_PARAMETERS_PEAKLIST_rawdatafilename		C:\DATA\CC\GuoDanDan iTRAQ\??\sample10.wiff	10	51	3846	3846
	103	RESULTS_SEARCH_103_PARAMETERS_PEAKLIST_rawdatafilename		C:\DATA\CC\GuoDanDan iTRAQ\??\sample10.wiff	10	52	3869	3869	3869	3869
	104	RESULTS_SEARCH_104_PARAMETERS_PEAKLIST_rawdatafilename		C:\DATA\CC\GuoDanDan iTRAQ\??\sample10.wiff	10	52	3869	3869
	105	RESULTS_SEARCH_105_PARAMETERS_PEAKLIST_rawdatafilename		C:\DATA\CC\GuoDanDan iTRAQ\??\sample10.wiff	10	53	3858	3858	3858	3858
	106	RESULTS_SEARCH_106_PARAMETERS_PEAKLIST_rawdatafilename		C:\DATA\CC\GuoDanDan iTRAQ\??\sample10.wiff	10	53	3858	3858
	107	RESULTS_SEARCH_107_PARAMETERS_PEAKLIST_rawdatafilename		C:\DATA\CC\GuoDanDan iTRAQ\??\sample10.wiff	10	54	3833	3833	3833	3833
	108	RESULTS_SEARCH_108_PARAMETERS_PEAKLIST_rawdatafilename		C:\DATA\CC\GuoDanDan iTRAQ\??\sample10.wiff	10	54	3833	3833
	109	RESULTS_SEARCH_109_PARAMETERS_PEAKLIST_rawdatafilename		C:\DATA\CC\GuoDanDan iTRAQ\??\sample11.wiff	11	55	3951	3951	3951	3951	11
	110	RESULTS_SEARCH_110_PARAMETERS_PEAKLIST_rawdatafilename		C:\DATA\CC\GuoDanDan iTRAQ\??\sample11.wiff	11	55	3951	3951
	111	RESULTS_SEARCH_111_PARAMETERS_PEAKLIST_rawdatafilename		C:\DATA\CC\GuoDanDan iTRAQ\??\sample11.wiff	11	56	3972	3972	3972	3972
	112	RESULTS_SEARCH_112_PARAMETERS_PEAKLIST_rawdatafilename		C:\DATA\CC\GuoDanDan iTRAQ\??\sample11.wiff	11	56	3972	3972
	113	RESULTS_SEARCH_113_PARAMETERS_PEAKLIST_rawdatafilename		C:\DATA\CC\GuoDanDan iTRAQ\??\sample11.wiff	11	57	3946	3946	3946	3946
	114	RESULTS_SEARCH_114_PARAMETERS_PEAKLIST_rawdatafilename		C:\DATA\CC\GuoDanDan iTRAQ\??\sample11.wiff	11	57	3946	3946
	115	RESULTS_SEARCH_115_PARAMETERS_PEAKLIST_rawdatafilename		C:\DATA\CC\GuoDanDan iTRAQ\??\sample11.wiff	11	58	3941	3941	3941	3941
	116	RESULTS_SEARCH_116_PARAMETERS_PEAKLIST_rawdatafilename		C:\DATA\CC\GuoDanDan iTRAQ\??\sample11.wiff	11	58	3941	3941
	117	RESULTS_SEARCH_117_PARAMETERS_PEAKLIST_rawdatafilename		C:\DATA\CC\GuoDanDan iTRAQ\??\sample11.wiff	11	59	3951	3951	3951	3951
	118	RESULTS_SEARCH_118_PARAMETERS_PEAKLIST_rawdatafilename		C:\DATA\CC\GuoDanDan iTRAQ\??\sample11.wiff	11	59	3951	3951
	119	RESULTS_SEARCH_119_PARAMETERS_PEAKLIST_rawdatafilename		C:\DATA\CC\GuoDanDan iTRAQ\??\sample11.wiff	11	60	3944	3944	3944	3944
	120	RESULTS_SEARCH_120_PARAMETERS_PEAKLIST_rawdatafilename		C:\DATA\CC\GuoDanDan iTRAQ\??\sample11.wiff	11	60	3944	3944
	121	RESULTS_SEARCH_121_PARAMETERS_PEAKLIST_rawdatafilename		C:\DATA\CC\GuoDanDan iTRAQ\??\sample12.wiff	12	61	3967	3967	3967	3967	12
	122	RESULTS_SEARCH_122_PARAMETERS_PEAKLIST_rawdatafilename		C:\DATA\CC\GuoDanDan iTRAQ\??\sample12.wiff	12	61	3967	3967
	123	RESULTS_SEARCH_123_PARAMETERS_PEAKLIST_rawdatafilename		C:\DATA\CC\GuoDanDan iTRAQ\??\sample12.wiff	12	62	3909	3909	3909	3909
	124	RESULTS_SEARCH_124_PARAMETERS_PEAKLIST_rawdatafilename		C:\DATA\CC\GuoDanDan iTRAQ\??\sample12.wiff	12	62	3909	3909
	125	RESULTS_SEARCH_125_PARAMETERS_PEAKLIST_rawdatafilename		C:\DATA\CC\GuoDanDan iTRAQ\??\sample12.wiff	12	63	3943	3943	3943	3943
	126	RESULTS_SEARCH_126_PARAMETERS_PEAKLIST_rawdatafilename		C:\DATA\CC\GuoDanDan iTRAQ\??\sample12.wiff	12	63	3943	3943
	127	RESULTS_SEARCH_127_PARAMETERS_PEAKLIST_rawdatafilename		C:\DATA\CC\GuoDanDan iTRAQ\??\sample12.wiff	12	64	3937	3937	3937	3937
	128	RESULTS_SEARCH_128_PARAMETERS_PEAKLIST_rawdatafilename		C:\DATA\CC\GuoDanDan iTRAQ\??\sample12.wiff	12	64	3937	3937
	129	RESULTS_SEARCH_129_PARAMETERS_PEAKLIST_rawdatafilename		C:\DATA\CC\GuoDanDan iTRAQ\??\sample12.wiff	12	65	3941	3941	3941	3941
	130	RESULTS_SEARCH_130_PARAMETERS_PEAKLIST_rawdatafilename		C:\DATA\CC\GuoDanDan iTRAQ\??\sample12.wiff	12	65	3941	3941
	131	RESULTS_SEARCH_131_PARAMETERS_PEAKLIST_rawdatafilename		C:\DATA\CC\GuoDanDan iTRAQ\??\sample12.wiff	12	66	3925	3925	3925	3925
	132	RESULTS_SEARCH_132_PARAMETERS_PEAKLIST_rawdatafilename		C:\DATA\CC\GuoDanDan iTRAQ\??\sample12.wiff	12	66	3925	3925

## Sheet: Curated Metadata
Group file metadata term	Metadata Description (of raw extracted item)	Use Partial Match	Term in Stream	Derived (Calculated)	Value	Validation check/comments	Conversion type, if done	Conversion factor		Metadata Category	Metadata Description of Final Metadata Item (converted manually, if applicable)	Value
	Group filename			1						Attributes - General	Group filename	proteomics data-iTRAQ 8plex -blank-fa30.group
RESULTS_SEARCH_1_PARAMETERS_PARAGON_METHOD_SETTINGS_UI_START_TIME	Start date		1		2021-02-02 19:26:30					Attributes - General	Start date	2021-02-02 19:26:30
RESULTS_SEARCH_STAT_search_begin_time_clock	Start time		1		02/02/2021 19:26:30					Attributes - General	Start time	02/02/2021 19:26:30
RESULTS_SEARCH_1_PARAMETERS_PARAGON_METHOD_SETTINGS_UI_USER_NAME	User name		1		Omics-PC\Omics					Attributes - General	User name	Omics-PC\Omics
RESULTS_SEARCH_1_xml:id	Internal search identifier number		1	1						Attributes - General	Internal search identifier number
PARAMETERS_PEAKLIST_original_count				1						Attributes - Input data	Number of spectra in search	250169
PARAMETERS_PEAKLIST_count				1						Attributes - Input data	Number of non-empty spectra in search	250169
PARAMETERS_PEAKLIST_filenumber	Number of input files	1	1	1	12					Attributes - Input data	Number of input files	12
RESULTS_SEARCH_1_PARAMETERS_PARAGON_METHOD_SETTINGS_UI_SAMPLE_TYPE	Sample Type		1		iTRAQ 8plex (Peptide Labeled)					Parameters - User settings	Sample Type	iTRAQ 8plex (Peptide Labeled)
RESULTS_SEARCH_1_PARAMETERS_PARAGON_METHOD_SETTINGS_UI_CYS_ALKYLATION	Cysteine Alkylation		1		Iodoacetamide					Parameters - User settings	Cysteine Alkylation	Iodoacetamide
RESULTS_SEARCH_1_PARAMETERS_PARAGON_METHOD_SETTINGS_UI_DIGESTION	Digestion		1		Trypsin					Parameters - User settings	Digestion	Trypsin
RESULTS_SEARCH_1_PARAMETERS_PARAGON_METHOD_SETTINGS_UI_SPECIAL_FACTOR	Special Factors									Parameters - User settings	Special Factors
RESULTS_SEARCH_1_PARAMETERS_PARAGON_METHOD_SETTINGS_UI_INSTRUMENT	Instrument		1		TripleTOF 5600					Parameters - User settings	Instrument	TripleTOF 5600
RESULTS_SEARCH_1_PARAMETERS_PARAGON_METHOD_SETTINGS_UI_SPECIES	Species		1		Homo sapiens					Parameters - User settings	Species	Homo sapiens
RESULTS_SEARCH_1_PARAMETERS_PARAGON_METHOD_SETTINGS_UI_SEARCH_EFFORT	Search Effort		1		Thorough					Parameters - User settings	Search Effort	Thorough
RESULTS_SEARCH_1_PARAMETERS_PARAGON_METHOD_SETTINGS_UI_ID_FOCUS	ID Focus		1		Biological modifications					Parameters - User settings	ID Focus	Biological modifications
RESULTS_SEARCH_1_PARAMETERS_PARAGON_METHOD_SETTINGS_UI_MIN_UNUSED_PROTSCORE	Minimum Unused ProtScore		1		0.0458					Parameters - User settings	Minimum Unused ProtScore	0.0458
RESULTS_SEARCH_1_PARAMETERS_PARAGON_METHOD_SETTINGS_UI_PSPEP	FDR Analysis		1		TRUE		Logical to English			Parameters - User settings	FDR Analysis	Yes
	Quantitation						Logical to English			Parameters - User settings	Quantitation
RESULTS_SEARCH_1_PARAMETERS_QUANT_TYPE_background_correction	Background Correction		1		FALSE		Logical to English			Parameters - User settings	Background Correction	No
RESULTS_SEARCH_1_PARAMETERS_QUANT_TYPE_bias_correction	Bias Correction		1		TRUE		Logical to English			Parameters - User settings	Bias Correction	Yes
	Channel to use as denominator in ratios									Parameters - User settings	Channel to use as denominator in ratios
RESULTS_SEARCH_1_PARAMETERS_chemical_data_edited	Modified Data Dictionary or Parameter Translation		1		FALSE		Logical to English			Parameters - User settings	Modified Data Dictionary or Parameter Translation	No
RESULTS_SEARCH_1_PARAMETERS_FASTA_filename	Database filename		1		C:\AB SCIEX\ProteinPilot Data\SearchDatabases\uniprot_Human_reviewed_20210202.fasta					Attributes - Search database	Database filename	C:\AB SCIEX\ProteinPilot Data\SearchDatabases\uniprot_Human_reviewed_20210202.fasta
				1						Attributes - Search database	Number of Proteins in Database	20393
RESULTS_SEARCH_STAT_num_proteins	Number of proteins searched		1		40786					Attributes - Search database	Number of proteins searched	40786
				1						Attributes - Search database	Number of Residues in Database	11364219
RESULTS_SEARCH_STAT_num_residues	Number of residues searched		1		22728438					Attributes - Search database	Number of residues searched	22728438
RESULTS_SEARCH_STAT_computer_memory	RAM (MB)		1		32689					Attributes - Hardware	RAM (MB)	32689
RESULTS_SEARCH_STAT_computer_name	Computer name		1		OMICS-PC					Attributes - Hardware	Computer name	OMICS-PC
RESULTS_SEARCH_STAT_number_cores	Number of cores in computer		1		16					Attributes - Hardware	Number of cores in computer	16
RESULTS_SEARCH_STAT_number_processors	Number of threads (double cores if hyperthreading on)		1		32					Attributes - Hardware	Number of threads (double cores if hyperthreading on)	32
RESULTS_SEARCH_STAT_number_licensed_tasks	Number of cores licensed to use		1		16					Attributes - Software environment	Number of cores licensed to use	16
RESULTS_SEARCH_STAT_os	Operating system		1		Windows 7 Professional Service Pack 1 (6.1.7601)					Attributes - Software environment	Operating system	Windows 7 Professional Service Pack 1 (6.1.7601)
RESULTS_SEARCH_1_PARAMETERS_VERSION	ProteinPilot Software Version		1		5.0.2.0, 5346					Attributes - Software environment	ProteinPilot Software Version	5.0.2.0, 5346
RESULTS_SEARCH_1_PARAMETERS_PARAGON_VERSION	Paragon Algorithm Version		1		5.0.2.0, 5174					Attributes - Software environment	Paragon Algorithm Version	5.0.2.0, 5174
RESULTS_SEARCH_1_PARAMETERS_APPLICATION	Application name		1		ProteinPilot(tm) Software					Attributes - Software environment	Application name	ProteinPilot(tm) Software
RESULTS_GROUPRESULTSUMMARY_1_confidence	Confidence of first row in summary statistics ID statistics		1		0.99		Fraction to %	100		Statistics - Protein Summary Table	Percent Confidence of first row in Summary Statistics ID Statistics	99
RESULTS_GROUPRESULTSUMMARY_1_distinctpeptides	Distinct peptides associated with 99% confidence proteins		1		55452					Statistics - Protein Summary Table	Distinct peptides associated with 99% confidence proteins	55452
RESULTS_GROUPRESULTSUMMARY_1_proteinsbeforegroupping	Proteins before grouping (99% confidence)		1		5207					Statistics - Protein Summary Table	Proteins before grouping (99% confidence)	5207
RESULTS_GROUPRESULTSUMMARY_1_proteinsidentified	Proteins detected (99% confidence)		1		3195					Statistics - Protein Summary Table	Proteins detected (99% confidence)	3195
RESULTS_GROUPRESULTSUMMARY_1_spectraidentified	Spectra associated with 99% confidence proteins		1		113954					Statistics - Protein Summary Table	Spectra associated with 99% confidence proteins	113954
RESULTS_GROUPRESULTSUMMARY_2_confidence	Confidence of second row in Summary Statistics ID statistics		1		0.95		Fraction to %	100		Statistics - Protein Summary Table	Percent Confidence of first row in Summary Statistics ID Statistics	95
RESULTS_GROUPRESULTSUMMARY_2_distinctpeptides	Distinct peptides associated with 95% confidence proteins		1		56324					Statistics - Protein Summary Table	Distinct peptides associated with 95% confidence proteins	56324
RESULTS_GROUPRESULTSUMMARY_2_proteinsbeforegroupping	Proteins before grouping (95% confidence)		1		6080					Statistics - Protein Summary Table	Proteins before grouping (95% confidence)	6080
RESULTS_GROUPRESULTSUMMARY_2_proteinsidentified	Proteins detected (95% confidence)		1		3618					Statistics - Protein Summary Table	Proteins detected (95% confidence)	3618
RESULTS_GROUPRESULTSUMMARY_2_spectraidentified	Spectra associated with 95% confidence proteins		1		115061					Statistics - Protein Summary Table	Spectra associated with 95% confidence proteins	115061
RESULTS_GROUPRESULTSUMMARY_3_confidence	Confidence of third row in summary statistics ID statistics		1		0.66		Fraction to %	100		Statistics - Protein Summary Table	Percent Confidence of first row in Summary Statistics ID Statistics	66
RESULTS_GROUPRESULTSUMMARY_3_distinctpeptides	Distinct peptides associated with 66% confidence proteins		1		57222					Statistics - Protein Summary Table	Distinct peptides associated with 66% confidence proteins	57222
RESULTS_GROUPRESULTSUMMARY_3_proteinsbeforegroupping	Proteins before grouping (66% confidence)		1		7251					Statistics - Protein Summary Table	Proteins before grouping (66% confidence)	7251
RESULTS_GROUPRESULTSUMMARY_3_proteinsidentified	Proteins detected (66% confidence)		1		3993					Statistics - Protein Summary Table	Proteins detected (66% confidence)	3993
RESULTS_GROUPRESULTSUMMARY_3_spectraidentified	Spectra associated with 66% confidence proteins		1		116142					Statistics - Protein Summary Table	Spectra associated with 66% confidence proteins	116142
RESULTS_GROUPRESULTSUMMARY_4_confidence	Confidence of fourth row in Summary Statistics ID statistics		1		0.100088		Fraction to %	100		Statistics - Protein Summary Table	Percent Confidence of first row in Summary Statistics ID Statistics	10.0088
RESULTS_GROUPRESULTSUMMARY_4_distinctpeptides	Distinct peptides associated with 10% confidence proteins		1		58848					Statistics - Protein Summary Table	Distinct peptides associated with 10% confidence proteins	58848
RESULTS_GROUPRESULTSUMMARY_4_proteinsbeforegroupping	Proteins before grouping (10% confidence)		1		15955					Statistics - Protein Summary Table	Proteins before grouping (10% confidence)	15955
RESULTS_GROUPRESULTSUMMARY_4_proteinsidentified	Proteins detected (10% confidence)		1		4796					Statistics - Protein Summary Table	Proteins detected (10% confidence)	4796
RESULTS_GROUPRESULTSUMMARY_4_spectraidentified	Spectra associated with 10% confidence proteins		1		118086					Statistics - Protein Summary Table	Spectra associated with 10% confidence proteins	118086
PARAMETERS_PEAKLIST_partnumber	Number of segments the input data are broken into	1	1	1	66					Parameters - Search Dimension Factors	Number of segments the input data are broken into	66
				1						Parameters - Search Dimension Factors	Number of searches per segment (2 for Thorough, 1 for Rapid)	2
				1						Parameters - Search Dimension Factors	Number of apparent sub-searches in group file	132
RESULTS_SEARCH_1_PARAMETERS_do_reverse_search	Do reversed search		1		TRUE					Parameters - Search Dimension Factors	Do reversed search	TRUE
RESULTS_SEARCH_1_PARAMETERS_QUANT_TYPE_separate_searches	Do separate searches for each plex in MS1 quantitation		1		FALSE					Parameters - Search Dimension Factors	Do separate searches for each plex in MS1 quantitation	FALSE
RESULTS_SEARCH_1_PARAMETERS_maxresults	Maximum number of hypotheses to keep per spectrum		1		15					Parameters - Search Dimension Factors	Maximum number of hypotheses to keep per spectrum	15
RESULTS_SEARCH_1_PARAMETERS_MSTOLERANCE_type	MS1 initial mass error tolerance type		1		dalton					Parameters - Identification - Mass accuracy	MS1 initial mass error tolerance type	dalton
RESULTS_SEARCH_1_PARAMETERS_MSTOLERANCE_value	MS1 initial mass error tolerance value		1		0.05					Parameters - Identification - Mass accuracy	MS1 initial mass error tolerance value	0.05
RESULTS_SEARCH_1_PARAMETERS_MSMSTOLERANCE_type	MS2 initial mass error tolerance type		1		dalton					Parameters - Identification - Mass accuracy	MS2 initial mass error tolerance type	dalton
RESULTS_SEARCH_1_PARAMETERS_MSMSTOLERANCE_value	MS2 initial mass error tolerance value		1		0.1					Parameters - Identification - Mass accuracy	MS2 initial mass error tolerance value	0.1
RESULTS_SEARCH_1_PARAMETERS_MS_STANDARD_DEVIATION_type	MS1 final mass error standard deviation type		1		dalton					Parameters - Identification - Mass accuracy	MS1 final mass error standard deviation type	dalton
RESULTS_SEARCH_1_PARAMETERS_MS_STANDARD_DEVIATION_value	MS1 final mass error standard deviation value		1		0.0011					Parameters - Identification - Mass accuracy	MS1 final mass error standard deviation value	0.0011
RESULTS_SEARCH_1_PARAMETERS_MSMS_STANDARD_DEVIATION_type	MS2 final mass error standard deviation type		1		dalton					Parameters - Identification - Mass accuracy	MS2 final mass error standard deviation type	dalton
RESULTS_SEARCH_1_PARAMETERS_MSMS_STANDARD_DEVIATION_value	MS2 final mass error standard deviation value		1		0.01					Parameters - Identification - Mass accuracy	MS2 final mass error standard deviation value	0.01
RESULTS_SEARCH_1_PARAMETERS_do_multiprecursor_search	Use multi-precursor search function		1		TRUE					Parameters - Identification - Multi-precursor search	Use multi-precursor search function	TRUE
RESULTS_SEARCH_1_PARAMETERS_MAX_PRECURSORS_FRAGLET	Maximum number of different precursor masses to try to match to in the Fraglet stage when doing multi-precursor search		1		5					Parameters - Identification - Multi-precursor search	Maximum number of different precursor masses to try to match to in the Fraglet stage when doing multi-precursor search	5
RESULTS_SEARCH_1_PARAMETERS_PRECURSORS_DR_FRAGLET	Maximum dynamic range gap of secondary precursors vs primary precursor in the Fraglet stage when doing multi-precursor search		1		10					Parameters - Identification - Multi-precursor search	Maximum dynamic range gap of secondary precursors vs primary precursor in the Fraglet stage when doing multi-precursor search	10
RESULTS_SEARCH_1_PARAMETERS_MAX_PRECURSORS_TAGLET	Maximum number of different precursor masses to try to match to in the Taglet stage when doing multi-precursor search		1		1					Parameters - Identification - Multi-precursor search	Maximum number of different precursor masses to try to match to in the Taglet stage when doing multi-precursor search	1
RESULTS_SEARCH_1_PARAMETERS_PRECURSORS_DR_TAGLET	Maximum dynamic range gap of secondary precursors vs primary precursor in the Taglet stage when doing multi-precursor search		1		3					Parameters - Identification - Multi-precursor search	Maximum dynamic range gap of secondary precursors vs primary precursor in the Taglet stage when doing multi-precursor search	3
RESULTS_SEARCH_1_PARAMETERS_DEFAULT_CHARGE_STATE_1_charge	First charge state to consider when precursor z is not determined		1		2					Parameters - Identification - Charge ambiguity	First charge state to consider when precursor z is not determined	2
RESULTS_SEARCH_1_PARAMETERS_DEFAULT_CHARGE_STATE_1_probability	Probability of first charge state to consider when precursor z is not determined		1		1					Parameters - Identification - Charge ambiguity	Probability of first charge state to consider when precursor z is not determined	1
RESULTS_SEARCH_1_PARAMETERS_DEFAULT_CHARGE_STATE_2_charge	Second charge state to consider when precursor z is not determined		1		3					Parameters - Identification - Charge ambiguity	Second charge state to consider when precursor z is not determined	3
RESULTS_SEARCH_1_PARAMETERS_DEFAULT_CHARGE_STATE_2_probability	Probability of second charge state to consider when precursor z is not determined		1		1					Parameters - Identification - Charge ambiguity	Probability of second charge state to consider when precursor z is not determined	1
RESULTS_SEARCH_1_PARAMETERS_DEFAULT_CHARGE_STATE_3_charge	Third charge state to consider when precursor z is not determined		1		4					Parameters - Identification - Charge ambiguity	Third charge state to consider when precursor z is not determined	4
RESULTS_SEARCH_1_PARAMETERS_DEFAULT_CHARGE_STATE_3_probability	Probability of third charge state to consider when precursor z is not determined		1		1					Parameters - Identification - Charge ambiguity	Probability of third charge state to consider when precursor z is not determined	1
RESULTS_SEARCH_1_PARAMETERS_DEFAULT_CHARGE_STATE_4_charge	Fourth charge state to consider when precursor z is not determined									Parameters - Identification - Charge ambiguity	Fourth charge state to consider when precursor z is not determined
RESULTS_SEARCH_1_PARAMETERS_DEFAULT_CHARGE_STATE_4_probability	Probability of fourth charge state to consider when precursor z is not determined									Parameters - Identification - Charge ambiguity	Probability of fourth charge state to consider when precursor z is not determined
RESULTS_SEARCH_1_PARAMETERS_PROGROUP_bayesconfidencecalclulation	Use Bayesian protein confidence calculation		1		TRUE					Parameters - Protein Grouping	Use Bayesian protein confidence calculation	TRUE
RESULTS_SEARCH_1_PARAMETERS_PROGROUP_calibrateconfidence	Use peptide FDR analysis to recalibrate peptide confidences		1		TRUE					Parameters - Protein Grouping	Use peptide FDR analysis to recalibrate peptide confidences	TRUE
RESULTS_SEARCH_1_PARAMETERS_PROGROUP_focusingintersection	In mid-Pro Group, minimum Intersection ProtScore to be in Same Group		1		4					Parameters - Protein Grouping	In mid-Pro Group, minimum Intersection ProtScore to be in Same Group	4
RESULTS_SEARCH_1_PARAMETERS_PROGROUP_focusingminunusedprotscore	In mid-Pro Group, minimum Unused ProtScore to keep a Group		1		0.1					Parameters - Protein Grouping	In mid-Pro Group, minimum Unused ProtScore to keep a Group	0.1
RESULTS_SEARCH_1_PARAMETERS_PROGROUP_focusingsubsetcutoff	In mid-Pro Group, keep competitor proteins with ProtScore units from winner		1		6					Parameters - Protein Grouping	In mid-Pro Group, keep competitor proteins with ProtScore units from winner	6
RESULTS_SEARCH_1_PARAMETERS_PROGROUP_intersection	In final Pro Group, minimum Intersection ProtScore to be in same group		1		1.3					Parameters - Protein Grouping	In final Pro Group, minimum Intersection ProtScore to be in same group	1.3
RESULTS_SEARCH_1_PARAMETERS_PROGROUP_minunusedprotscore	In final Pro Group, minimum Unused ProtScore to keep a group		1		0.0458					Parameters - Protein Grouping	In final Pro Group, minimum Unused ProtScore to keep a group	0.0458
RESULTS_SEARCH_1_PARAMETERS_PROGROUP_subsetcutoff	In final Pro Group, keep competitor proteins with ProtScore units from winner		1		2					Parameters - Protein Grouping	In final Pro Group, keep competitor proteins with ProtScore units from winner	2
RESULTS_SEARCH_1_PARAMETERS_QUANT_TYPE_background_correction	Do isobaric quant background correction algorithm		1		FALSE					Parameters - Quantitation - processing	Do isobaric quant background correction algorithm	FALSE
RESULTS_SEARCH_1_PARAMETERS_QUANT_TYPE_bias_correction	Normalize the central tendency of protein ratios to be unity		1		TRUE					Parameters - Quantitation - processing	Normalize the central tendency of protein ratios to be unity	TRUE
RESULTS_SEARCH_1_PARAMETERS_QUANT_TYPE_median_statistic	Compute protein-level ratios from the median of peptide ratios		1		FALSE					Parameters - Quantitation - processing	Compute protein-level ratios from the median of peptide ratios	FALSE
RESULTS_SEARCH_1_PARAMETERS_QUANT_TYPE_quant_threshold	Quant threshold setting no longer used		1		-1					Parameters - Quantitation - processing	Quant threshold setting no longer used	-1
RESULTS_SEARCH_1_PARAMETERS_QUANT_TYPE_quant_threshold_sn	Use measures for quantitation if signal to noise is greater than		1		5					Parameters - Quantitation - processing	Use measures for quantitation if signal to noise is greater than	5
RESULTS_SEARCH_1_PARAMETERS_max_quant_labels	Maximum number of labels allowed on a peptide for it to be used for quantitation		1		35					Parameters - Quantitation - curation	Maximum number of labels allowed on a peptide for it to be used for quantitation	35
RESULTS_SEARCH_1_PARAMETERS_QUANT_TYPE_keep_extreme_peptides_over_fraction	Include extreme ratios in the protein ratio calculation if the fraction of peptides from a protein having extreme ratios is greater than		1		0.15					Parameters - Quantitation - curation	Include extreme ratios in the protein ratio calculation if the fraction of peptides from a protein having extreme ratios is greater than	0.15
RESULTS_SEARCH_1_PARAMETERS_QUANT_TYPE_low_confidence_check	Exclude quantitation data if identification confidence does not pass a threshold value		1		TRUE					Parameters - Quantitation - curation	Exclude quantitation data if identification confidence does not pass a threshold value	TRUE
RESULTS_SEARCH_1_PARAMETERS_QUANT_TYPE_low_intensity_check	Exclude quantitation data if a minimum intensity is not passed		1		TRUE					Parameters - Quantitation - curation	Exclude quantitation data if a minimum intensity is not passed	TRUE
RESULTS_SEARCH_1_PARAMETERS_QUANT_TYPE_mod_check	Exclude quantitation data based on discordant peptide logic		1		TRUE					Parameters - Quantitation - curation	Exclude quantitation data based on discordant peptide logic	TRUE
RESULTS_SEARCH_1_PARAMETERS_QUANT_TYPE_shared_msms_check	Exclude quantitation data using sharing logic		1		TRUE					Parameters - Quantitation - curation	Exclude quantitation data using sharing logic	TRUE
RESULTS_SEARCH_1_PARAMETERS_PROGROUP_unusedprotscorethresholdforexcludingothersfromquant	Minimum protein confidence to consider a protein confident and capable of excluding spectra as shared		1		1.3					Parameters - Quantitation - curation	Minimum protein confidence to consider a protein confident and capable of excluding spectra as shared	1.3
RESULTS_SEARCH_1_PARAMETERS_PROGROUP_confidencepercentthresholdforexcludingothersfromquant	Minimum peptide percent confidence from a confident protein to consider a spectrum shared		1		15					Parameters - Quantitation - curation	Minimum peptide percent confidence from a confident protein to consider a spectrum shared	15
RESULTS_SEARCH_1_PARAMETERS_PROGROUP_confidencepercentthresholdforincludingselfinquant	Minimum peptide confidence to be used for quantitation		1		15					Parameters - Quantitation - curation	Minimum peptide confidence to be used for quantitation	15
RESULTS_SEARCH_1_PARAMETERS_PROGROUP_autodiscordantpeptidethreshold	Consider a peptide discordant if joint feature probability less than		1		0.3					Parameters - Quantitation - curation	Consider a peptide discordant if joint feature probability less than	0.3
RESULTS_SEARCH_1_PARAMETERS_PROGROUP_compresspeptides	Show results only for distinct peptides, suppressing redundancy		1		FALSE					Parameters - Non-functional	Show results only for distinct peptides, suppressing redundancy	FALSE
RESULTS_SEARCH_1_PARAMETERS_PROGROUP_donotstoremspeaklists	Do not store MS1 level data		1		FALSE					Parameters - Non-functional	Do not store MS1 level data	FALSE
RESULTS_SEARCH_STAT_search_begin_time_clock	Start time - Search		1		02/02/2021 19:26:30					Statistics - Processing Times - Start&Stop Clock Times	Start time - Search	02/02/2021 19:26:30
RESULTS_SEARCH_STAT_search_end_time_clock	End time - Search		1		02/03/2021 09:42:24					Statistics - Processing Times - Start&Stop Clock Times	End time - Search	02/03/2021 09:42:24
RESULTS_SEARCH_STAT_stage_searching_begin_time_clock	Start time - Identification algorithm stages		1		02/02/2021 20:35:28					Statistics - Processing Times - Start&Stop Clock Times	Start time - Identification algorithm stages	02/02/2021 20:35:28
RESULTS_SEARCH_STAT_stage_searching_end_time_clock	End time - Identification algorithm stages		1		02/03/2021 09:38:07					Statistics - Processing Times - Start&Stop Clock Times	End time - Identification algorithm stages	02/03/2021 09:38:07
RESULTS_SEARCH_STAT_stage_signal_processing_begin_time_clock	Start time - Signal processing stage		1		02/02/2021 19:26:30					Statistics - Processing Times - Start&Stop Clock Times	Start time - Signal processing stage	02/02/2021 19:26:30
RESULTS_SEARCH_STAT_stage_signal_processing_end_time_clock	End time - Signal processing stage		1		02/02/2021 20:35:11					Statistics - Processing Times - Start&Stop Clock Times	End time - Signal processing stage	02/02/2021 20:35:11
RESULTS_SEARCH_STAT_stage_waiting_begin_time_clock	Start time - Waiting stage		1		02/02/2021 20:35:11					Statistics - Processing Times - Start&Stop Clock Times	Start time - Waiting stage	02/02/2021 20:35:11
RESULTS_SEARCH_STAT_stage_waiting_end_time_clock	End time - Waiting stage		1		02/02/2021 20:35:28					Statistics - Processing Times - Start&Stop Clock Times	End time - Waiting stage	02/02/2021 20:35:28
RESULTS_SEARCH_STAT_task_fraglet_exe_begin_time_clock	Start time - Fraglet Algorithm search stage		1		02/03/2021 05:03:30					Statistics - Processing Times - Start&Stop Clock Times	Start time - Fraglet Algorithm search stage	02/03/2021 05:03:30
RESULTS_SEARCH_STAT_task_fraglet_exe_end_time_clock	End time - Fraglet Algorithm search stage		1		02/03/2021 05:20:01					Statistics - Processing Times - Start&Stop Clock Times	End time - Fraglet Algorithm search stage	02/03/2021 05:20:01
RESULTS_SEARCH_STAT_task_focusing_begin_time_clock	Start time - Mid-Pro Group Algorithm stage		1		02/03/2021 05:20:01					Statistics - Processing Times - Start&Stop Clock Times	Start time - Mid-Pro Group Algorithm stage	02/03/2021 05:20:01
RESULTS_SEARCH_STAT_task_focusing_end_time_clock	End time - Mid-Pro Group Algorithm stage		1		02/03/2021 05:58:18					Statistics - Processing Times - Start&Stop Clock Times	End time - Mid-Pro Group Algorithm stage	02/03/2021 05:58:18
RESULTS_SEARCH_STAT_task_taglet_exe_begin_time_clock	Start time - Taglet Algorithm search stage		1		02/03/2021 05:58:18					Statistics - Processing Times - Start&Stop Clock Times	Start time - Taglet Algorithm search stage	02/03/2021 05:58:18
RESULTS_SEARCH_STAT_task_taglet_exe_end_time_clock	End time - Taglet Algorithm search stage		1		02/03/2021 08:41:44					Statistics - Processing Times - Start&Stop Clock Times	End time - Taglet Algorithm search stage	02/03/2021 08:41:44
RESULTS_SEARCH_STAT_task_progroup_begin_time_clock	Start time - Final Pro Group Algorithm stage		1		02/03/2021 08:41:44					Statistics - Processing Times - Start&Stop Clock Times	Start time - Final Pro Group Algorithm stage	02/03/2021 08:41:44
RESULTS_SEARCH_STAT_task_progroup_end_time_clock	End time - Final Pro Group Algorithm stage		1		02/03/2021 09:38:06					Statistics - Processing Times - Start&Stop Clock Times	End time - Final Pro Group Algorithm stage	02/03/2021 09:38:06
RESULTS_SEARCH_STAT_stage_fdr_begin_time_clock	Start time - FDR analysis stage		1		02/03/2021 09:38:08					Statistics - Processing Times - Start&Stop Clock Times	Start time - FDR analysis stage	02/03/2021 09:38:08
RESULTS_SEARCH_STAT_stage_fdr_end_time_clock	End time - FDR analysis stage		1		02/03/2021 09:42:24					Statistics - Processing Times - Start&Stop Clock Times	End time - FDR analysis stage	02/03/2021 09:42:24
RESULTS_SEARCH_STAT_search_time_duration	Clock Time Duration for Full Search (ms)		1		51354592		msec to min	1.66667e-05		Statistics - Processing Times - Duration in Real Clock Times	Clock time duration - Full search (min)	855.91
RESULTS_SEARCH_STAT_stage_searching_time_duration	Clock Time Duration for Identification Algorithm Stages (ms)		1		46958926		msec to min	1.66667e-05		Statistics - Processing Times - Duration in Real Clock Times	Clock time duration - Identification algorithm stages (min)	782.649
RESULTS_SEARCH_STAT_stage_signal_processing_time_duration	Clock Time Duration for Waiting Stage (ms)		1		4121455		msec to min	1.66667e-05		Statistics - Processing Times - Duration in Real Clock Times	Clock time duration - Signal processing stage (min)	68.6909
RESULTS_SEARCH_STAT_stage_waiting_time_duration	Clock Time Duration for Signal Processing Stage (ms)		1		16247		msec to min	1.66667e-05		Statistics - Processing Times - Duration in Real Clock Times	Clock time duration - Waiting stage (min)	0.270783
RESULTS_SEARCH_STAT_task_fraglet_exe_time_duration	Clock Time Duration for Fraglet Algorithm Stage (ms)		1		991302		msec to min	1.66667e-05		Statistics - Processing Times - Duration in Real Clock Times	Clock time duration - Fraglet Algorithm stage (min)	16.5217
RESULTS_SEARCH_STAT_task_focusing_time_duration	Clock Time Duration for Mid-Pro Group Algorithm Stage (ms)		1		2296665		msec to min	1.66667e-05		Statistics - Processing Times - Duration in Real Clock Times	Clock time duration - Mid-Pro Group Algorithm stage (min)	38.2778
RESULTS_SEARCH_STAT_task_taglet_exe_time_duration	Clock Time Duration for Taglet Algorithm Stage (ms)		1		9805756		msec to min	1.66667e-05		Statistics - Processing Times - Duration in Real Clock Times	Clock time duration - Taglet Algorithm stage (min)	163.429
RESULTS_SEARCH_STAT_task_progroup_time_duration	Clock Time Duration for Pro Group Algorithm Stage (ms)		1		3382454		msec to min	1.66667e-05		Statistics - Processing Times - Duration in Real Clock Times	Clock time duration - Pro Group Algorithm stage (min)	56.3742
RESULTS_SEARCH_STAT_stage_fdr_time_duration	Clock Time Duration for FDR Analysis (ms)		1		256123		msec to min	1.66667e-05		Statistics - Processing Times - Duration in Real Clock Times	Clock time duration - FDR Analysis (min)	4.26872
				1						Statistics - Processing Times - Duration in Real Clock Times	Clock time not accounted for in measured stages	508.077
	CPU Time Duration for Signal Processing Stage (ms)						msec to min	1.66667e-05		Statistics - Processing Times - Duration in CPU Time	CPU time duration - Signal Processing stage (min)
RESULTS_SEARCH_STAT_task_fraglet_exe_time_cpu	CPU Time Duration for Fraglet Algorithm Stage (ms)		1		4546493		msec to min	1.66667e-05		Statistics - Processing Times - Duration in CPU Time	CPU time duration - Fraglet Algorithm stage (min)	75.7749
RESULTS_SEARCH_STAT_task_focusing_time_cpu	CPU Time Duration for Mid-Pro Group Algorithm Stage (ms)		1		11633696		msec to min	1.66667e-05		Statistics - Processing Times - Duration in CPU Time	CPU time duration - Mid-Pro Group Algorithm stage (min)	193.895
RESULTS_SEARCH_STAT_task_taglet_exe_time_cpu	CPU Time Duration for Taglet Algorithm Stage (ms)		1		51347994		msec to min	1.66667e-05		Statistics - Processing Times - Duration in CPU Time	CPU time duration - Taglet Algorithm stage (min)	855.8
RESULTS_SEARCH_STAT_task_progroup_time_cpu	CPU Time Duration for Pro Group Algorithm Stage (ms)		1		11720963		msec to min	1.66667e-05		Statistics - Processing Times - Duration in CPU Time	CPU time duration - Pro Group Algorithm stage (min)	195.349
				1						Statistics - Processing Times - Percent by Stage	Percent of clock time - Identification Algorithm stages	0.914406
				1						Statistics - Processing Times - Percent by Stage	Percent of clock time - Signal Processing stage	0.0802548
				1						Statistics - Processing Times - Percent by Stage	Percent of clock time - Waiting stage	0.000316369
				1						Statistics - Processing Times - Percent by Stage	Percent of clock time - Fraglet Algorithm stage	0.0193031
				1						Statistics - Processing Times - Percent by Stage	Percent of clock time - Mid-Pro Group Algorithm stage	0.0447217
				1						Statistics - Processing Times - Percent by Stage	Percent of clock time - Taglet Algorithm stage	0.190942
				1						Statistics - Processing Times - Percent by Stage	Percent of clock time - Pro Group Algorithm stage	0.0658647
				1						Statistics - Processing Times - Percent by Stage	Percent of clock time - FDR Analysis	0.00498734
				1						Statistics - Processing Rate - Clock (Sec/Spectrum)	Clock time rate (sec/spect) - Full Search	0.20528
				1						Statistics - Processing Rate - Clock (Sec/Spectrum)	Clock time rate (sec/spect) - Identification Algorithm stages	0.187709
				1						Statistics - Processing Rate - Clock (Sec/Spectrum)	Clock time rate (sec/spect) - Signal processing stage	0.0164747
				1						Statistics - Processing Rate - Clock (Sec/Spectrum)	Clock time rate (sec/spect) - Waiting stage	6.49441e-05
				1						Statistics - Processing Rate - Clock (Sec/Spectrum)	Clock time rate (sec/spect) - Fraglet Algorithm stage	0.00396253
				1						Statistics - Processing Rate - Clock (Sec/Spectrum)	Clock time rate (sec/spect) - Mid-Pro Group Algorithm stage	0.00918045
				1						Statistics - Processing Rate - Clock (Sec/Spectrum)	Clock time rate (sec/spect) - Taglet Algorithm stage	0.0391965
				1						Statistics - Processing Rate - Clock (Sec/Spectrum)	Clock time rate (sec/spect) - Pro Group Algorithm stage	0.0135207
				1						Statistics - Processing Rate - Clock (Sec/Spectrum)	Clock time rate (sec/spect) - FDR Analysis	0.0010238
				1						Statistics - Processing Rate - CPU (Sec/Spectrum)	CPU time rate (sec/spect) - Signal processing stage
				1						Statistics - Processing Rate - CPU (Sec/Spectrum)	CPU time rate (sec/spect) - Fraglet Algorithm stage	0.0181737
				1						Statistics - Processing Rate - CPU (Sec/Spectrum)	CPU time rate (sec/spect) - Mid-Pro Group Algorithm stage	0.0465033
				1						Statistics - Processing Rate - CPU (Sec/Spectrum)	CPU time rate (sec/spect) - Taglet Algorithm stage	0.205253
				1						Statistics - Processing Rate - CPU (Sec/Spectrum)	CPU time rate (sec/spect) - Pro Group Algorithm stage	0.0468522
				1						Statistics - Processing Rate - Clock (Sec/Spectrum/DB Protein)	Clock time rate (sec/spect/DB protein) - Full search	5.03309e-06
				1						Statistics - Processing Rate - Clock (Sec/Spectrum/DB Protein)	Clock time rate (sec/spect/DB protein) - Identification algorithm stages	4.60229e-06
				1						Statistics - Processing Rate - Clock (Sec/Spectrum/DB Protein)	Clock time rate (sec/spect/DB protein) - Signal processing stage	4.0393e-07
				1						Statistics - Processing Rate - Clock (Sec/Spectrum/DB Protein)	Clock time rate (sec/spect/DB protein) - Waiting stage	1.59231e-09
				1						Statistics - Processing Rate - Clock (Sec/Spectrum/DB Protein)	Clock time rate (sec/spect/DB protein) - Fraglet Algorithm stage	9.71542e-08
				1						Statistics - Processing Rate - Clock (Sec/Spectrum/DB Protein)	Clock time rate (sec/spect/DB protein) - Mid-Pro Group Algorithm stage	2.25088e-07
				1						Statistics - Processing Rate - Clock (Sec/Spectrum/DB Protein)	Clock time rate (sec/spect/DB protein) - Taglet Algorithm stage	9.61029e-07
				1						Statistics - Processing Rate - Clock (Sec/Spectrum/DB Protein)	Clock time rate (sec/spect/DB protein) - Pro Group Algorithm stage	3.31503e-07
				1						Statistics - Processing Rate - Clock (Sec/Spectrum/DB Protein)	Clock time rate (sec/spect/DB protein) - FDR Analysis	2.51017e-08
				1						Statistics - Processing Rate - CPU (Sec/Spectrum/DB Protein)	CPU time rate (sec/spect/DB protein) - Signal processing stage
				1						Statistics - Processing Rate - CPU (Sec/Spectrum/DB Protein)	CPU time rate (sec/spect/DB protein) - Fraglet Algorithm stage	4.45586e-07
				1						Statistics - Processing Rate - CPU (Sec/Spectrum/DB Protein)	CPU time rate (sec/spect/DB protein) - Mid-Pro Group Algorithm stage	1.14018e-06
				1						Statistics - Processing Rate - CPU (Sec/Spectrum/DB Protein)	CPU time rate (sec/spect/DB protein) - Taglet Algorithm stage	5.03244e-06
				1						Statistics - Processing Rate - CPU (Sec/Spectrum/DB Protein)	CPU time rate (sec/spect/DB protein) - Pro Group Algorithm stage	1.14873e-06
				1						Statistics - Extent of Distribution - Fundamental	Distribution factor - CPU vs. clock time - Signal processing stage
				1						Statistics - Extent of Distribution - Fundamental	Distribution factor - CPU vs. clock time - Fraglet Algorithm stage	4.58639
				1						Statistics - Extent of Distribution - Fundamental	Distribution factor - CPU vs. clock time - Mid-Pro Group Algorithm stage	5.06547
				1						Statistics - Extent of Distribution - Fundamental	Distribution factor - CPU vs. clock time - Taglet Algorithm stage	5.23652
				1						Statistics - Extent of Distribution - Fundamental	Distribution factor - CPU vs. clock time - Pro Group Algorithm stage	3.46522
				1						Statistics - Extent of Distribution - vs Segments	Ratio of distribution factor to number of search segments - Signal processing stage
				1						Statistics - Extent of Distribution - vs Segments	Ratio of distribution factor to number of search segments - Fraglet Algorithm stage	0.0694907
				1						Statistics - Extent of Distribution - vs Segments	Ratio of distribution factor to number of search segments - Mid-Pro Group Algorithm stage	0.0767496
				1						Statistics - Extent of Distribution - vs Segments	Ratio of distribution factor to number of search segments - Taglet Algorithm stage	0.0793411
				1						Statistics - Extent of Distribution - vs Segments	Ratio of distribution factor to number of search segments - Pro Group Algorithm stage	0.0525034
				1						Statistics - Extent of Distribution - vs Licensed Cores	Ratio of distribution factor to number of licensed cores - Signal processing stage
				1						Statistics - Extent of Distribution - vs Licensed Cores	Ratio of distribution factor to number of licensed cores - Fraglet Algorithm stage	0.286649
				1						Statistics - Extent of Distribution - vs Licensed Cores	Ratio of distribution factor to number of licensed cores - Mid-Pro Group Algorithm stage	0.316592
				1						Statistics - Extent of Distribution - vs Licensed Cores	Ratio of distribution factor to number of licensed cores - Taglet Algorithm stage	0.327282
				1						Statistics - Extent of Distribution - vs Licensed Cores	Ratio of distribution factor to number of licensed cores - Pro Group Algorithm stage	0.216577
PARAMETERS_PEAKLIST_original_count	Average number of spectra per segment	1	1	1	3790.44					Statistics - Search Segmentation	Average number of spectra per segment	3790.44
PARAMETERS_PEAKLIST_original_count	Standard deviation of number of spectra per segment	1	1	1	184.055					Statistics - Search Segmentation	Standard deviation of number of spectra per segment	184.055
PARAMETERS_PEAKLIST_original_count	Maximum number of spectra per segment	1	1	1	4007					Statistics - Search Segmentation	Maximum number of spectra per segment	4007
PARAMETERS_PEAKLIST_original_count	Minimum number of spectra per segment	1	1	1	3141					Statistics - Search Segmentation	Minimum number of spectra per segment	3141
										Attributes - Input data filenames	Filename of Input File 1	C:\DATA\CC\GuoDanDan iTRAQ\??\sample1.wiff
										Attributes - Input data filenames	Filename of Input File 2	C:\DATA\CC\GuoDanDan iTRAQ\??\sample2.wiff
										Attributes - Input data filenames	Filename of Input File 3	C:\DATA\CC\GuoDanDan iTRAQ\??\sample3.wiff
										Attributes - Input data filenames	Filename of Input File 4	C:\DATA\CC\GuoDanDan iTRAQ\??\sample4.wiff
										Attributes - Input data filenames	Filename of Input File 5	C:\DATA\CC\GuoDanDan iTRAQ\??\sample5.wiff
										Attributes - Input data filenames	Filename of Input File 6	C:\DATA\CC\GuoDanDan iTRAQ\??\sample6.wiff
										Attributes - Input data filenames	Filename of Input File 7	C:\DATA\CC\GuoDanDan iTRAQ\??\sample7.wiff
										Attributes - Input data filenames	Filename of Input File 8	C:\DATA\CC\GuoDanDan iTRAQ\??\sample8.wiff
										Attributes - Input data filenames	Filename of Input File 9	C:\DATA\CC\GuoDanDan iTRAQ\??\sample9.wiff
										Attributes - Input data filenames	Filename of Input File 10	C:\DATA\CC\GuoDanDan iTRAQ\??\sample10.wiff
										Attributes - Input data filenames	Filename of Input File 11	C:\DATA\CC\GuoDanDan iTRAQ\??\sample11.wiff
										Attributes - Input data filenames	Filename of Input File 12	C:\DATA\CC\GuoDanDan iTRAQ\??\sample12.wiff
										Attributes - Input data filenames	Filename of Input File 13
										Attributes - Input data filenames	Filename of Input File 14
										Attributes - Input data filenames	Filename of Input File 15
										Attributes - Input data filenames	Filename of Input File 16
										Attributes - Input data filenames	Filename of Input File 17
										Attributes - Input data filenames	Filename of Input File 18
										Attributes - Input data filenames	Filename of Input File 19
										Attributes - Input data filenames	Filename of Input File 20
										Attributes - Input data filenames	Filename of Input File 21
										Attributes - Input data filenames	Filename of Input File 22
										Attributes - Input data filenames	Filename of Input File 23
										Attributes - Input data filenames	Filename of Input File 24
										Attributes - Input data filenames	Filename of Input File 25
										Attributes - Input data filenames	Filename of Input File 26
										Attributes - Input data filenames	Filename of Input File 27
										Attributes - Input data filenames	Filename of Input File 28
										Attributes - Input data filenames	Filename of Input File 29
										Attributes - Input data filenames	Filename of Input File 30
										Attributes - Input data filenames	Filename of Input File 31
										Attributes - Input data filenames	Filename of Input File 32
										Attributes - Input data filenames	Filename of Input File 33
										Attributes - Input data filenames	Filename of Input File 34
										Attributes - Input data filenames	Filename of Input File 35
										Attributes - Input data filenames	Filename of Input File 36
										Attributes - Input data filenames	Filename of Input File 37
										Attributes - Input data filenames	Filename of Input File 38
										Attributes - Input data filenames	Filename of Input File 39
										Attributes - Input data filenames	Filename of Input File 40
										Attributes - Input data filenames	Filename of Input File 41
										Attributes - Input data filenames	Filename of Input File 42
										Attributes - Input data filenames	Filename of Input File 43
										Attributes - Input data filenames	Filename of Input File 44
										Attributes - Input data filenames	Filename of Input File 45
										Attributes - Input data filenames	Filename of Input File 46
										Attributes - Input data filenames	Filename of Input File 47
										Attributes - Input data filenames	Filename of Input File 48
										Attributes - Input data filenames	Filename of Input File 49
										Attributes - Input data filenames	Filename of Input File 50
										Attributes - Input data filenames	Filename of Input File 51
										Attributes - Input data filenames	Filename of Input File 52
										Attributes - Input data filenames	Filename of Input File 53
										Attributes - Input data filenames	Filename of Input File 54
										Attributes - Input data filenames	Filename of Input File 55
										Attributes - Input data filenames	Filename of Input File 56
										Attributes - Input data filenames	Filename of Input File 57
										Attributes - Input data filenames	Filename of Input File 58
										Attributes - Input data filenames	Filename of Input File 59
										Attributes - Input data filenames	Filename of Input File 60
										Attributes - Input data filenames	Filename of Input File 61
										Attributes - Input data filenames	Filename of Input File 62
										Attributes - Input data filenames	Filename of Input File 63
										Attributes - Input data filenames	Filename of Input File 64
										Attributes - Input data filenames	Filename of Input File 65
										Attributes - Input data filenames	Filename of Input File 66
										Attributes - Input data filenames	Filename of Input File 67
										Attributes - Input data filenames	Filename of Input File 68
										Attributes - Input data filenames	Filename of Input File 69
										Attributes - Input data filenames	Filename of Input File 70
										Attributes - Input data filenames	Filename of Input File 71
										Attributes - Input data filenames	Filename of Input File 72
										Attributes - Input data filenames	Filename of Input File 73
										Attributes - Input data filenames	Filename of Input File 74
										Attributes - Input data filenames	Filename of Input File 75
										Attributes - Input data filenames	Filename of Input File 76
										Attributes - Input data filenames	Filename of Input File 77
										Attributes - Input data filenames	Filename of Input File 78
										Attributes - Input data filenames	Filename of Input File 79
										Attributes - Input data filenames	Filename of Input File 80
										Attributes - Input data filenames	Filename of Input File 81
										Attributes - Input data filenames	Filename of Input File 82
										Attributes - Input data filenames	Filename of Input File 83
										Attributes - Input data filenames	Filename of Input File 84
										Attributes - Input data filenames	Filename of Input File 85
										Attributes - Input data filenames	Filename of Input File 86
										Attributes - Input data filenames	Filename of Input File 87
										Attributes - Input data filenames	Filename of Input File 88
										Attributes - Input data filenames	Filename of Input File 89
										Attributes - Input data filenames	Filename of Input File 90
										Attributes - Input data filenames	Filename of Input File 91
										Attributes - Input data filenames	Filename of Input File 92
										Attributes - Input data filenames	Filename of Input File 93
										Attributes - Input data filenames	Filename of Input File 94
										Attributes - Input data filenames	Filename of Input File 95
										Attributes - Input data filenames	Filename of Input File 96
										Attributes - Input data filenames	Filename of Input File 97
										Attributes - Input data filenames	Filename of Input File 98
										Attributes - Input data filenames	Filename of Input File 99
										Attributes - Input data filenames	Filename of Input File 100
										Attributes - Input data filenames	Filename of Input File 101
										Attributes - Input data filenames	Filename of Input File 102
										Attributes - Input data filenames	Filename of Input File 103
										Attributes - Input data filenames	Filename of Input File 104
										Attributes - Input data filenames	Filename of Input File 105
										Attributes - Input data filenames	Filename of Input File 106
										Attributes - Input data filenames	Filename of Input File 107
										Attributes - Input data filenames	Filename of Input File 108
										Attributes - Input data filenames	Filename of Input File 109
										Attributes - Input data filenames	Filename of Input File 110
										Attributes - Input data filenames	Filename of Input File 111
										Attributes - Input data filenames	Filename of Input File 112
										Attributes - Input data filenames	Filename of Input File 113
										Attributes - Input data filenames	Filename of Input File 114
										Attributes - Input data filenames	Filename of Input File 115
										Attributes - Input data filenames	Filename of Input File 116
										Attributes - Input data filenames	Filename of Input File 117
										Attributes - Input data filenames	Filename of Input File 118
										Attributes - Input data filenames	Filename of Input File 119
										Attributes - Input data filenames	Filename of Input File 120
										Attributes - Input data filenames	Filename of Input File 121
										Attributes - Input data filenames	Filename of Input File 122
										Attributes - Input data filenames	Filename of Input File 123
										Attributes - Input data filenames	Filename of Input File 124
										Attributes - Input data filenames	Filename of Input File 125
										Attributes - Input data filenames	Filename of Input File 126
										Attributes - Input data filenames	Filename of Input File 127
										Attributes - Input data filenames	Filename of Input File 128
										Attributes - Input data filenames	Filename of Input File 129
										Attributes - Input data filenames	Filename of Input File 130
										Attributes - Input data filenames	Filename of Input File 131
										Attributes - Input data filenames	Filename of Input File 132
										Attributes - Input data filenames	Filename of Input File 133
										Attributes - Input data filenames	Filename of Input File 134
										Attributes - Input data filenames	Filename of Input File 135
										Attributes - Input data filenames	Filename of Input File 136
										Attributes - Input data filenames	Filename of Input File 137
										Attributes - Input data filenames	Filename of Input File 138
										Attributes - Input data filenames	Filename of Input File 139
										Attributes - Input data filenames	Filename of Input File 140
										Attributes - Input data filenames	Filename of Input File 141
										Attributes - Input data filenames	Filename of Input File 142
										Attributes - Input data filenames	Filename of Input File 143
										Attributes - Input data filenames	Filename of Input File 144
										Attributes - Input data filenames	Filename of Input File 145
										Attributes - Input data filenames	Filename of Input File 146
										Attributes - Input data filenames	Filename of Input File 147
										Attributes - Input data filenames	Filename of Input File 148
										Attributes - Input data filenames	Filename of Input File 149
										Attributes - Input data filenames	Filename of Input File 150
										Attributes - Input data filenames	Filename of Input File 151
										Attributes - Input data filenames	Filename of Input File 152
										Attributes - Input data filenames	Filename of Input File 153
										Attributes - Input data filenames	Filename of Input File 154
										Attributes - Input data filenames	Filename of Input File 155
										Attributes - Input data filenames	Filename of Input File 156
										Attributes - Input data filenames	Filename of Input File 157
										Attributes - Input data filenames	Filename of Input File 158
										Attributes - Input data filenames	Filename of Input File 159
										Attributes - Input data filenames	Filename of Input File 160
										Attributes - Input data filenames	Filename of Input File 161
										Attributes - Input data filenames	Filename of Input File 162
										Attributes - Input data filenames	Filename of Input File 163
										Attributes - Input data filenames	Filename of Input File 164
										Attributes - Input data filenames	Filename of Input File 165
										Attributes - Input data filenames	Filename of Input File 166
										Attributes - Input data filenames	Filename of Input File 167
										Attributes - Input data filenames	Filename of Input File 168
										Attributes - Input data filenames	Filename of Input File 169
										Attributes - Input data filenames	Filename of Input File 170
										Attributes - Input data filenames	Filename of Input File 171
										Attributes - Input data filenames	Filename of Input File 172
										Attributes - Input data filenames	Filename of Input File 173
										Attributes - Input data filenames	Filename of Input File 174
										Attributes - Input data filenames	Filename of Input File 175
										Attributes - Input data filenames	Filename of Input File 176
										Attributes - Input data filenames	Filename of Input File 177
										Attributes - Input data filenames	Filename of Input File 178
										Attributes - Input data filenames	Filename of Input File 179
										Attributes - Input data filenames	Filename of Input File 180
										Attributes - Input data filenames	Filename of Input File 181
										Attributes - Input data filenames	Filename of Input File 182
										Attributes - Input data filenames	Filename of Input File 183
										Attributes - Input data filenames	Filename of Input File 184
										Attributes - Input data filenames	Filename of Input File 185
										Attributes - Input data filenames	Filename of Input File 186
										Attributes - Input data filenames	Filename of Input File 187
										Attributes - Input data filenames	Filename of Input File 188
										Attributes - Input data filenames	Filename of Input File 189
										Attributes - Input data filenames	Filename of Input File 190
										Attributes - Input data filenames	Filename of Input File 191
										Attributes - Input data filenames	Filename of Input File 192
										Attributes - Input data filenames	Filename of Input File 193
										Attributes - Input data filenames	Filename of Input File 194
										Attributes - Input data filenames	Filename of Input File 195
										Attributes - Input data filenames	Filename of Input File 196
										Attributes - Input data filenames	Filename of Input File 197
										Attributes - Input data filenames	Filename of Input File 198
										Attributes - Input data filenames	Filename of Input File 199
										Attributes - Input data filenames	Filename of Input File 200

## Sheet: Protein Level Data
Protein Level Data	Unused ProtScore Threshold	Confidence Threshold	Forward	Reverse	Correct	Incorrect	Total	Global FDR	q-value	Fit Unused ProtScore Threshold	Fit Confidence Threshold	Fit Forward	Fit Reverse	Fit Correct	Fit Incorrect	Fit Total	Fit Global FDR	Fit Local FDR
	358.05	1	1	0	1	0	1	0	0	358.05	1	0.999994	5.83201e-06	0.999988	1.1664e-05	1	1.1664e-05	1.1664e-05
	348.94	1	2	0	2	0	2	0	0	348.94	1	1.99999	1.1664e-05	1.99998	2.33281e-05	2	1.1664e-05	1.16641e-05
	266.86	1	3	0	3	0	3	0	0	266.86	1	2.99998	1.74961e-05	2.99997	3.49922e-05	3	1.16641e-05	1.16641e-05
	246.18	1	4	0	4	0	4	0	0	246.18	1	3.99998	2.33282e-05	3.99995	4.66564e-05	4	1.16641e-05	1.16642e-05
	219.14	1	5	0	5	0	5	0	0	219.14	1	4.99997	2.91603e-05	4.99994	5.83206e-05	5	1.16641e-05	1.16642e-05
	205.23	1	6	0	6	0	6	0	0	205.23	1	5.99997	3.49924e-05	5.99993	6.99849e-05	6	1.16641e-05	1.16643e-05
	186.48	1	7	0	7	0	7	0	0	186.48	1	6.99996	4.08246e-05	6.99992	8.16492e-05	7	1.16642e-05	1.16643e-05
	178.61	1	8	0	8	0	8	0	0	178.61	1	7.99995	4.66568e-05	7.99991	9.33136e-05	8	1.16642e-05	1.16644e-05
	160.68	1	9	0	9	0	9	0	0	160.68	1	8.99995	5.2489e-05	8.9999	0.000104978	9	1.16642e-05	1.16644e-05
	147.3	1	10	0	10	0	10	0	0	147.3	1	9.99994	5.83213e-05	9.99988	0.000116643	10	1.16643e-05	1.16645e-05
	145.17	1	11	0	11	0	11	0	0	145.17	1	10.9999	6.41535e-05	10.9999	0.000128307	11	1.16643e-05	1.16645e-05
	134.65	1	12	0	12	0	12	0	0	134.65	1	11.9999	6.99858e-05	11.9999	0.000139972	12	1.16643e-05	1.16646e-05
	119.91	1	13	0	13	0	13	0	0	119.91	1	12.9999	7.58182e-05	12.9998	0.000151636	13	1.16643e-05	1.16646e-05
	119.08	1	14	0	14	0	14	0	0	119.08	1	13.9999	8.16505e-05	13.9998	0.000163301	14	1.16644e-05	1.16647e-05
	115.31	1	15	0	15	0	15	0	0	115.31	1	14.9999	8.74829e-05	14.9998	0.000174966	15	1.16644e-05	1.16648e-05
	111.3	1	16	0	16	0	16	0	0	111.3	1	15.9999	9.33153e-05	15.9998	0.000186631	16	1.16644e-05	1.16648e-05
	110.3	1	17	0	17	0	17	0	0	110.3	1	16.9999	9.91477e-05	16.9998	0.000198295	17	1.16644e-05	1.16649e-05
	110.03	1	18	0	18	0	18	0	0	110.03	1	17.9999	0.00010498	17.9998	0.00020996	18	1.16645e-05	1.16649e-05
	108.08	1	19	0	19	0	19	0	0	108.08	1	18.9999	0.000110813	18.9998	0.000221625	19	1.16645e-05	1.1665e-05
	107.88	1	20	0	20	0	20	0	0	107.88	1	19.9999	0.000116645	19.9998	0.00023329	20	1.16645e-05	1.1665e-05
	107.35	1	21	0	21	0	21	0	0	107.35	1	20.9999	0.000122478	20.9998	0.000244955	21	1.16645e-05	1.16651e-05
	107.04	1	22	0	22	0	22	0	0	107.04	1	21.9999	0.00012831	21.9997	0.000256621	22	1.16646e-05	1.16651e-05
	105.45	1	23	0	23	0	23	0	0	105.45	1	22.9999	0.000134143	22.9997	0.000268286	23	1.16646e-05	1.16652e-05
	104.69	1	24	0	24	0	24	0	0	104.69	1	23.9999	0.000139975	23.9997	0.000279951	24	1.16646e-05	1.16652e-05
	102.74	1	25	0	25	0	25	0	0	102.74	1	24.9999	0.000145808	24.9997	0.000291616	25	1.16646e-05	1.16653e-05
	100.96	1	26	0	26	0	26	0	0	100.96	1	25.9998	0.000151641	25.9997	0.000303282	26	1.16647e-05	1.16653e-05
	97.49	1	27	0	27	0	27	0	0	97.49	1	26.9998	0.000157473	26.9997	0.000314947	27	1.16647e-05	1.16654e-05
	95.69	1	28	0	28	0	28	0	0	95.69	1	27.9998	0.000163306	27.9997	0.000326612	28	1.16647e-05	1.16654e-05
	95.33	1	29	0	29	0	29	0	0	95.33	1	28.9998	0.000169139	28.9997	0.000338278	29	1.16648e-05	1.16655e-05
	95.23	1	30	0	30	0	30	0	0	95.23	1	29.9998	0.000174972	29.9997	0.000349943	30	1.16648e-05	1.16655e-05
	94.57	1	31	0	31	0	31	0	0	94.57	1	30.9998	0.000180805	30.9996	0.000361609	31	1.16648e-05	1.16656e-05
	94.17	1	32	0	32	0	32	0	0	94.17	1	31.9998	0.000186637	31.9996	0.000373275	32	1.16648e-05	1.16656e-05
	91.46	1	33	0	33	0	33	0	0	91.46	1	32.9998	0.00019247	32.9996	0.00038494	33	1.16649e-05	1.16657e-05
	91.15	1	34	0	34	0	34	0	0	91.15	1	33.9998	0.000198303	33.9996	0.000396606	34	1.16649e-05	1.16658e-05
	90.29	1	35	0	35	0	35	0	0	90.29	1	34.9998	0.000204136	34.9996	0.000408272	35	1.16649e-05	1.16658e-05
	89.52	1	36	0	36	0	36	0	0	89.52	1	35.9998	0.000209969	35.9996	0.000419938	36	1.16649e-05	1.16659e-05
	88.08	1	37	0	37	0	37	0	0	88.08	1	36.9998	0.000215802	36.9996	0.000431604	37	1.1665e-05	1.16659e-05
	88	1	38	0	38	0	38	0	0	88	1	37.9998	0.000221635	37.9996	0.00044327	38	1.1665e-05	1.1666e-05
	87.03	1	39	0	39	0	39	0	0	87.03	1	38.9998	0.000227468	38.9995	0.000454936	39	1.1665e-05	1.1666e-05
	85.96	1	40	0	40	0	40	0	0	85.96	1	39.9998	0.000233301	39.9995	0.000466602	40	1.1665e-05	1.16661e-05
	84.74	1	41	0	41	0	41	0	0	84.74	1	40.9998	0.000239134	40.9995	0.000478268	41	1.16651e-05	1.16661e-05
	84.52	1	42	0	42	0	42	0	0	84.52	1	41.9998	0.000244967	41.9995	0.000489934	42	1.16651e-05	1.16662e-05
	84.43	1	43	0	43	0	43	0	0	84.43	1	42.9997	0.0002508	42.9995	0.0005016	43	1.16651e-05	1.16662e-05
	83.77	1	44	0	44	0	44	0	0	83.77	1	43.9997	0.000256633	43.9995	0.000513267	44	1.16651e-05	1.16663e-05
	83.61	1	45	0	45	0	45	0	0	83.61	1	44.9997	0.000262466	44.9995	0.000524933	45	1.16652e-05	1.16663e-05
	83.29	1	46	0	46	0	46	0	0	83.29	1	45.9997	0.0002683	45.9995	0.000536599	46	1.16652e-05	1.16664e-05
	80.6	1	47	0	47	0	47	0	0	80.6	1	46.9997	0.000274133	46.9995	0.000548266	47	1.16652e-05	1.16664e-05
	79.52	1	48	0	48	0	48	0	0	79.52	1	47.9997	0.000279966	47.9994	0.000559932	48	1.16653e-05	1.16665e-05
	79.44	1	49	0	49	0	49	0	0	79.44	1	48.9997	0.000285799	48.9994	0.000571599	49	1.16653e-05	1.16665e-05
	78.39	1	50	0	50	0	50	0	0	78.39	1	49.9997	0.000291633	49.9994	0.000583265	50	1.16653e-05	1.16666e-05
	78.21	1	51	0	51	0	51	0	0	78.21	1	50.9997	0.000297466	50.9994	0.000594932	51	1.16653e-05	1.16666e-05
	77.76	1	52	0	52	0	52	0	0	77.76	1	51.9997	0.000303299	51.9994	0.000606599	52	1.16654e-05	1.16667e-05
	77.62	1	53	0	53	0	53	0	0	77.62	1	52.9997	0.000309133	52.9994	0.000618265	53	1.16654e-05	1.16668e-05
	75.59	1	54	0	54	0	54	0	0	75.59	1	53.9997	0.000314966	53.9994	0.000629932	54	1.16654e-05	1.16668e-05
	74.42	1	55	0	55	0	55	0	0	74.42	1	54.9997	0.0003208	54.9994	0.000641599	55	1.16654e-05	1.16669e-05
	73.46	1	56	0	56	0	56	0	0	73.46	1	55.9997	0.000326633	55.9993	0.000653266	56	1.16655e-05	1.16669e-05
	73.42	1	57	0	57	0	57	0	0	73.42	1	56.9997	0.000332467	56.9993	0.000664933	57	1.16655e-05	1.1667e-05
	73.19	1	58	0	58	0	58	0	0	73.19	1	57.9997	0.0003383	57.9993	0.0006766	58	1.16655e-05	1.1667e-05
	71.58	1	59	0	59	0	59	0	0	71.58	1	58.9997	0.000344134	58.9993	0.000688267	59	1.16655e-05	1.16671e-05
	71.26	1	60	0	60	0	60	0	0	71.26	1	59.9997	0.000349967	59.9993	0.000699934	60	1.16656e-05	1.16671e-05
	71.03	1	61	0	61	0	61	0	0	71.03	1	60.9996	0.000355801	60.9993	0.000711601	61	1.16656e-05	1.16672e-05
	70.67	1	62	0	62	0	62	0	0	70.67	1	61.9996	0.000361634	61.9993	0.000723269	62	1.16656e-05	1.16672e-05
	69.51	1	63	0	63	0	63	0	0	69.51	1	62.9996	0.000367468	62.9993	0.000734936	63	1.16656e-05	1.16673e-05
	68.79	1	64	0	64	0	64	0	0	68.79	1	63.9996	0.000373302	63.9993	0.000746603	64	1.16657e-05	1.16673e-05
	68.09	1	65	0	65	0	65	0	0	68.09	1	64.9996	0.000379135	64.9992	0.000758271	65	1.16657e-05	1.16674e-05
	68	1	66	0	66	0	66	0	0	68	1	65.9996	0.000384969	65.9992	0.000769938	66	1.16657e-05	1.16674e-05
	66.62	1	67	0	67	0	67	0	0	66.62	1	66.9996	0.000390803	66.9992	0.000781606	67	1.16658e-05	1.16675e-05
	66.08	1	68	0	68	0	68	0	0	66.08	1	67.9996	0.000396637	67.9992	0.000793273	68	1.16658e-05	1.16675e-05
	65.82	1	69	0	69	0	69	0	0	65.82	1	68.9996	0.00040247	68.9992	0.000804941	69	1.16658e-05	1.16676e-05
	65.09	1	70	0	70	0	70	0	0	65.09	1	69.9996	0.000408304	69.9992	0.000816608	70	1.16658e-05	1.16677e-05
	65.07	1	71	0	71	0	71	0	0	65.07	1	70.9996	0.000414138	70.9992	0.000828276	71	1.16659e-05	1.16677e-05
	64.94	1	72	0	72	0	72	0	0	64.94	1	71.9996	0.000419972	71.9992	0.000839944	72	1.16659e-05	1.16678e-05
	64.76	1	73	0	73	0	73	0	0	64.76	1	72.9996	0.000425806	72.9991	0.000851612	73	1.16659e-05	1.16678e-05
	64.34	1	74	0	74	0	74	0	0	64.34	1	73.9996	0.00043164	73.9991	0.000863279	74	1.16659e-05	1.16679e-05
	64.22	1	75	0	75	0	75	0	0	64.22	1	74.9996	0.000437474	74.9991	0.000874947	75	1.1666e-05	1.16679e-05
	63.97	1	76	0	76	0	76	0	0	63.97	1	75.9996	0.000443308	75.9991	0.000886615	76	1.1666e-05	1.1668e-05
	63.65	1	77	0	77	0	77	0	0	63.65	1	76.9996	0.000449142	76.9991	0.000898283	77	1.1666e-05	1.1668e-05
	62.82	1	78	0	78	0	78	0	0	62.82	1	77.9995	0.000454976	77.9991	0.000909951	78	1.1666e-05	1.16681e-05
	62.64	1	79	0	79	0	79	0	0	62.64	1	78.9995	0.00046081	78.9991	0.00092162	79	1.16661e-05	1.16681e-05
	62.31	1	80	0	80	0	80	0	0	62.31	1	79.9995	0.000466644	79.9991	0.000933288	80	1.16661e-05	1.16682e-05
	62.28	1	81	0	81	0	81	0	0	62.28	1	80.9995	0.000472478	80.9991	0.000944956	81	1.16661e-05	1.16682e-05
	62.19	1	82	0	82	0	82	0	0	62.19	1	81.9995	0.000478312	81.999	0.000956624	82	1.16661e-05	1.16683e-05
	61.62	1	83	0	83	0	83	0	0	61.62	1	82.9995	0.000484146	82.999	0.000968293	83	1.16662e-05	1.16683e-05
	61.47	1	84	0	84	0	84	0	0	61.47	1	83.9995	0.00048998	83.999	0.000979961	84	1.16662e-05	1.16684e-05
	61.1	1	85	0	85	0	85	0	0	61.1	1	84.9995	0.000495815	84.999	0.000991629	85	1.16662e-05	1.16684e-05
	60.93	1	86	0	86	0	86	0	0	60.93	1	85.9995	0.000501649	85.999	0.0010033	86	1.16663e-05	1.16685e-05
	59.93	1	87	0	87	0	87	0	0	59.93	1	86.9995	0.000507483	86.999	0.00101497	87	1.16663e-05	1.16685e-05
	59.83	1	88	0	88	0	88	0	0	59.83	1	87.9995	0.000513318	87.999	0.00102664	88	1.16663e-05	1.16686e-05
	59.78	1	89	0	89	0	89	0	0	59.78	1	88.9995	0.000519152	88.999	0.0010383	89	1.16663e-05	1.16687e-05
	59.71	1	90	0	90	0	90	0	0	59.71	1	89.9995	0.000524986	89.999	0.00104997	90	1.16664e-05	1.16687e-05
	59.26	1	91	0	91	0	91	0	0	59.26	1	90.9995	0.000530821	90.9989	0.00106164	91	1.16664e-05	1.16688e-05
	58.89	1	92	0	92	0	92	0	0	58.89	1	91.9995	0.000536655	91.9989	0.00107331	92	1.16664e-05	1.16688e-05
	58.54	1	93	0	93	0	93	0	0	58.54	1	92.9995	0.000542489	92.9989	0.00108498	93	1.16664e-05	1.16689e-05
	58.24	1	94	0	94	0	94	0	0	58.24	1	93.9995	0.000548324	93.9989	0.00109665	94	1.16665e-05	1.16689e-05
	57.98	1	95	0	95	0	95	0	0	57.98	1	94.9994	0.000554158	94.9989	0.00110832	95	1.16665e-05	1.1669e-05
	57.03	1	96	0	96	0	96	0	0	57.03	1	95.9994	0.000559993	95.9989	0.00111999	96	1.16665e-05	1.1669e-05
	56.75	1	97	0	97	0	97	0	0	56.75	1	96.9994	0.000565827	96.9989	0.00113165	97	1.16665e-05	1.16691e-05
	54.53	1	98	0	98	0	98	0	0	54.53	1	97.9994	0.000571662	97.9989	0.00114332	98	1.16666e-05	1.16691e-05
	54.38	1	99	0	99	0	99	0	0	54.38	1	98.9994	0.000577497	98.9988	0.00115499	99	1.16666e-05	1.16692e-05
	54.03	1	100	0	100	0	100	0	0	54.03	1	99.9994	0.000583331	99.9988	0.00116666	100	1.16666e-05	1.16692e-05
	54.02	1	101	0	101	0	101	0	0	54.02	1	100.999	0.000589166	100.999	0.00117833	101	1.16667e-05	1.16693e-05
	53.71	1	102	0	102	0	102	0	0	53.71	1	101.999	0.000595001	101.999	0.00119	102	1.16667e-05	1.16693e-05
	53.3	1	103	0	103	0	103	0	0	53.3	1	102.999	0.000600835	102.999	0.00120167	103	1.16667e-05	1.16694e-05
	53.21	1	104	0	104	0	104	0	0	53.21	1	103.999	0.00060667	103.999	0.00121334	104	1.16667e-05	1.16694e-05
	53	1	105	0	105	0	105	0	0	53	1	104.999	0.000612505	104.999	0.00122501	105	1.16668e-05	1.16695e-05
	52.98	1	106	0	106	0	106	0	0	52.98	1	105.999	0.000618339	105.999	0.00123668	106	1.16668e-05	1.16695e-05
	52.28	1	107	0	107	0	107	0	0	52.28	1	106.999	0.000624174	106.999	0.00124835	107	1.16668e-05	1.16696e-05
	52.25	1	108	0	108	0	108	0	0	52.25	1	107.999	0.000630009	107.999	0.00126002	108	1.16668e-05	1.16697e-05
	52.14	1	109	0	109	0	109	0	0	52.14	1	108.999	0.000635844	108.999	0.00127169	109	1.16669e-05	1.16697e-05
	52.06	1	110	0	110	0	110	0	0	52.06	1	109.999	0.000641679	109.999	0.00128336	110	1.16669e-05	1.16698e-05
	51.83	1	111	0	111	0	111	0	0	51.83	1	110.999	0.000647514	110.999	0.00129503	111	1.16669e-05	1.16698e-05
	51.69	1	112	0	112	0	112	0	0	51.69	1	111.999	0.000653349	111.999	0.0013067	112	1.16669e-05	1.16699e-05
	51.53	1	113	0	113	0	113	0	0	51.53	1	112.999	0.000659184	112.999	0.00131837	113	1.1667e-05	1.16699e-05
	51.36	1	114	0	114	0	114	0	0	51.36	1	113.999	0.000665019	113.999	0.00133004	114	1.1667e-05	1.167e-05
	50.99	1	115	0	115	0	115	0	0	50.99	1	114.999	0.000670854	114.999	0.00134171	115	1.1667e-05	1.167e-05
	50.97	1	116	0	116	0	116	0	0	50.97	1	115.999	0.000676689	115.999	0.00135338	116	1.1667e-05	1.16701e-05
	50.91	1	117	0	117	0	117	0	0	50.91	1	116.999	0.000682524	116.999	0.00136505	117	1.16671e-05	1.16701e-05
	50.8	1	118	0	118	0	118	0	0	50.8	1	117.999	0.000688359	117.999	0.00137672	118	1.16671e-05	1.16702e-05
	50.75	1	119	0	119	0	119	0	0	50.75	1	118.999	0.000694194	118.999	0.00138839	119	1.16671e-05	1.16702e-05
	50.54	1	120	0	120	0	120	0	0	50.54	1	119.999	0.000700029	119.999	0.00140006	120	1.16672e-05	1.16703e-05
	50.41	1	121	0	121	0	121	0	0	50.41	1	120.999	0.000705864	120.999	0.00141173	121	1.16672e-05	1.16703e-05
	49.76	1	122	0	122	0	122	0	0	49.76	1	121.999	0.000711699	121.999	0.0014234	122	1.16672e-05	1.16704e-05
	49.72	1	123	0	123	0	123	0	0	49.72	1	122.999	0.000717535	122.999	0.00143507	123	1.16672e-05	1.16704e-05
	49.13	1	124	0	124	0	124	0	0	49.13	1	123.999	0.00072337	123.999	0.00144674	124	1.16673e-05	1.16705e-05
	49.01	1	125	0	125	0	125	0	0	49.01	1	124.999	0.000729205	124.999	0.00145841	125	1.16673e-05	1.16706e-05
	48.98	1	126	0	126	0	126	0	0	48.98	1	125.999	0.00073504	125.999	0.00147008	126	1.16673e-05	1.16706e-05
	48.9	1	127	0	127	0	127	0	0	48.9	1	126.999	0.000740876	126.999	0.00148175	127	1.16673e-05	1.16707e-05
	48.85	1	128	0	128	0	128	0	0	48.85	1	127.999	0.000746711	127.999	0.00149342	128	1.16674e-05	1.16707e-05
	48.77	1	129	0	129	0	129	0	0	48.77	1	128.999	0.000752547	128.998	0.00150509	129	1.16674e-05	1.16708e-05
	48.66	1	130	0	130	0	130	0	0	48.66	1	129.999	0.000758382	129.998	0.00151676	130	1.16674e-05	1.16708e-05
	48.64	1	131	0	131	0	131	0	0	48.64	1	130.999	0.000764217	130.998	0.00152843	131	1.16674e-05	1.16709e-05
	48.37	1	132	0	132	0	132	0	0	48.37	1	131.999	0.000770053	131.998	0.00154011	132	1.16675e-05	1.16709e-05
	48.27	1	133	0	133	0	133	0	0	48.27	1	132.999	0.000775888	132.998	0.00155178	133	1.16675e-05	1.1671e-05
	48.21	1	134	0	134	0	134	0	0	48.21	1	133.999	0.000781724	133.998	0.00156345	134	1.16675e-05	1.1671e-05
	48.19	1	135	0	135	0	135	0	0	48.19	1	134.999	0.000787559	134.998	0.00157512	135	1.16675e-05	1.16711e-05
	48.13	1	136	0	136	0	136	0	0	48.13	1	135.999	0.000793395	135.998	0.00158679	136	1.16676e-05	1.16711e-05
	48.11	1	137	0	137	0	137	0	0	48.11	1	136.999	0.000799231	136.998	0.00159846	137	1.16676e-05	1.16712e-05
	48.01	1	138	0	138	0	138	0	0	48.01	1	137.999	0.000805066	137.998	0.00161013	138	1.16676e-05	1.16713e-05
	47.95	1	139	0	139	0	139	0	0	47.95	1	138.999	0.000810902	138.998	0.0016218	139	1.16677e-05	1.16713e-05
	47.47	1	140	0	140	0	140	0	0	47.47	1	139.999	0.000816738	139.998	0.00163348	140	1.16677e-05	1.16714e-05
	47.26	1	141	0	141	0	141	0	0	47.26	1	140.999	0.000822573	140.998	0.00164515	141	1.16677e-05	1.16714e-05
	47.1	1	142	0	142	0	142	0	0	47.1	1	141.999	0.000828409	141.998	0.00165682	142	1.16677e-05	1.16715e-05
	46.93	1	143	0	143	0	143	0	0	46.93	1	142.999	0.000834245	142.998	0.00166849	143	1.16678e-05	1.16715e-05
	46.73	1	144	0	144	0	144	0	0	46.73	1	143.999	0.000840081	143.998	0.00168016	144	1.16678e-05	1.16716e-05
	46.66	1	145	0	145	0	145	0	0	46.66	1	144.999	0.000845916	144.998	0.00169183	145	1.16678e-05	1.16716e-05
	46.64	1	146	0	146	0	146	0	0	46.64	1	145.999	0.000851752	145.998	0.0017035	146	1.16678e-05	1.16717e-05
	46.54	1	147	0	147	0	147	0	0	46.54	1	146.999	0.000857588	146.998	0.00171518	147	1.16679e-05	1.16717e-05
	46.51	1	148	0	148	0	148	0	0	46.51	1	147.999	0.000863424	147.998	0.00172685	148	1.16679e-05	1.16718e-05
	46.31	1	149	0	149	0	149	0	0	46.31	1	148.999	0.00086926	148.998	0.00173852	149	1.16679e-05	1.16718e-05
	46.08	1	150	0	150	0	150	0	0	46.08	1	149.999	0.000875096	149.998	0.00175019	150	1.16679e-05	1.16719e-05
	46.05	1	151	0	151	0	151	0	0	46.05	1	150.999	0.000880932	150.998	0.00176186	151	1.1668e-05	1.1672e-05
	45.93	1	152	0	152	0	152	0	0	45.93	1	151.999	0.000886768	151.998	0.00177354	152	1.1668e-05	1.1672e-05
	45.76	1	153	0	153	0	153	0	0	45.76	1	152.999	0.000892604	152.998	0.00178521	153	1.1668e-05	1.16721e-05
	45.65	1	154	0	154	0	154	0	0	45.65	1	153.999	0.00089844	153.998	0.00179688	154	1.16681e-05	1.16721e-05
	45.63	1	155	0	155	0	155	0	0	45.63	1	154.999	0.000904276	154.998	0.00180855	155	1.16681e-05	1.16722e-05
	45.61	1	156	0	156	0	156	0	0	45.61	1	155.999	0.000910112	155.998	0.00182022	156	1.16681e-05	1.16722e-05
	45.34	1	157	0	157	0	157	0	0	45.34	1	156.999	0.000915948	156.998	0.0018319	157	1.16681e-05	1.16723e-05
	45.12	1	158	0	158	0	158	0	0	45.12	1	157.999	0.000921784	157.998	0.00184357	158	1.16682e-05	1.16723e-05
	44.8	1	159	0	159	0	159	0	0	44.8	1	158.999	0.000927621	158.998	0.00185524	159	1.16682e-05	1.16724e-05
	44.75	1	160	0	160	0	160	0	0	44.75	1	159.999	0.000933457	159.998	0.00186691	160	1.16682e-05	1.16724e-05
	44.4	1	161	0	161	0	161	0	0	44.4	1	160.999	0.000939293	160.998	0.00187859	161	1.16682e-05	1.16725e-05
	44.39	1	162	0	162	0	162	0	0	44.39	1	161.999	0.000945129	161.998	0.00189026	162	1.16683e-05	1.16726e-05
	44.38	1	163	0	163	0	163	0	0	44.38	1	162.999	0.000950966	162.998	0.00190193	163	1.16683e-05	1.16726e-05
	44.37	1	164	0	164	0	164	0	0	44.37	1	163.999	0.000956802	163.998	0.0019136	164	1.16683e-05	1.16727e-05
	43.92	1	165	0	165	0	165	0	0	43.92	1	164.999	0.000962638	164.998	0.00192528	165	1.16683e-05	1.16727e-05
	43.56	1	166	0	166	0	166	0	0	43.56	1	165.999	0.000968475	165.998	0.00193695	166	1.16684e-05	1.16728e-05
	43.23	1	167	0	167	0	167	0	0	43.23	1	166.999	0.000974311	166.998	0.00194862	167	1.16684e-05	1.16728e-05
	42.95	1	168	0	168	0	168	0	0	42.95	1	167.999	0.000980148	167.998	0.0019603	168	1.16684e-05	1.16729e-05
	42.7	1	169	0	169	0	169	0	0	42.7	1	168.999	0.000985984	168.998	0.00197197	169	1.16685e-05	1.16729e-05
	42.64	1	170	0	170	0	170	0	0	42.64	1	169.999	0.000991821	169.998	0.00198364	170	1.16685e-05	1.1673e-05
	42.54	1	171	0	171	0	171	0	0	42.54	1	170.999	0.000997657	170.998	0.00199531	171	1.16685e-05	1.16731e-05
	42.32	1	172	0	172	0	172	0	0	42.32	1	171.999	0.00100349	171.998	0.00200699	172	1.16685e-05	1.16731e-05
	42.26	1	173	0	173	0	173	0	0	42.26	1	172.999	0.00100933	172.998	0.00201866	173	1.16686e-05	1.16732e-05
	42.19	1	174	0	174	0	174	0	0	42.19	1	173.999	0.00101517	173.998	0.00203033	174	1.16686e-05	1.16732e-05
	42.12	1	176	0	176	0	176	0	0	42.12	1	174.999	0.001021	174.998	0.00204201	175	1.16686e-05	1.16733e-05
	42	1	177	0	177	0	177	0	0	42.12	1	175.999	0.00102684	175.998	0.00205368	176	1.16686e-05	1.16733e-05
	41.95	1	178	0	178	0	178	0	0	42	1	176.999	0.00103268	176.998	0.00206535	177	1.16687e-05	1.16734e-05
	41.82	1	179	0	179	0	179	0	0	41.95	1	177.999	0.00103851	177.998	0.00207703	178	1.16687e-05	1.16734e-05
	41.74	1	180	0	180	0	180	0	0	41.82	1	178.999	0.00104435	178.998	0.0020887	179	1.16687e-05	1.16735e-05
	41.66	1	181	0	181	0	181	0	0	41.74	1	179.999	0.00105019	179.998	0.00210037	180	1.16687e-05	1.16736e-05
	41.54	1	182	0	182	0	182	0	0	41.66	1	180.999	0.00105602	180.998	0.00211205	181	1.16688e-05	1.16736e-05
	41.37	1	183	0	183	0	183	0	0	41.54	1	181.999	0.00106186	181.998	0.00212372	182	1.16688e-05	1.16737e-05
	41.34	1	184	0	184	0	184	0	0	41.37	1	182.999	0.0010677	182.998	0.0021354	183	1.16688e-05	1.16737e-05
	41.26	1	185	0	185	0	185	0	0	41.34	1	183.999	0.00107353	183.998	0.00214707	184	1.16689e-05	1.16738e-05
	40.94	1	186	0	186	0	186	0	0	41.26	1	184.999	0.00107937	184.998	0.00215874	185	1.16689e-05	1.16738e-05
	40.89	1	188	0	188	0	188	0	0	40.94	1	185.999	0.00108521	185.998	0.00217042	186	1.16689e-05	1.16739e-05
	40.87	1	189	0	189	0	189	0	0	40.89	1	186.999	0.00109105	186.998	0.00218209	187	1.16689e-05	1.1674e-05
	40.84	1	190	0	190	0	190	0	0	40.89	1	187.999	0.00109688	187.998	0.00219376	188	1.1669e-05	1.1674e-05
	40.59	1	191	0	191	0	191	0	0	40.87	1	188.999	0.00110272	188.998	0.00220544	189	1.1669e-05	1.16741e-05
	40.52	1	192	0	192	0	192	0	0	40.84	1	189.999	0.00110856	189.998	0.00221711	190	1.1669e-05	1.16741e-05
	40.48	1	193	0	193	0	193	0	0	40.59	1	190.999	0.00111439	190.998	0.00222879	191	1.1669e-05	1.16742e-05
	40.17	1	194	0	194	0	194	0	0	40.52	1	191.999	0.00112023	191.998	0.00224046	192	1.16691e-05	1.16742e-05
	39.75	1	195	0	195	0	195	0	0	40.48	1	192.999	0.00112607	192.998	0.00225214	193	1.16691e-05	1.16743e-05
	39.7	1	196	0	196	0	196	0	0	40.17	1	193.999	0.00113191	193.998	0.00226381	194	1.16691e-05	1.16744e-05
	39.65	1	197	0	197	0	197	0	0	39.75	1	194.999	0.00113774	194.998	0.00227548	195	1.16692e-05	1.16744e-05
	39.61	1	198	0	198	0	198	0	0	39.7	1	195.999	0.00114358	195.998	0.00228716	196	1.16692e-05	1.16745e-05
	39.53	1	199	0	199	0	199	0	0	39.65	1	196.999	0.00114942	196.998	0.00229883	197	1.16692e-05	1.16745e-05
	39.49	1	200	0	200	0	200	0	0	39.61	1	197.999	0.00115525	197.998	0.00231051	198	1.16692e-05	1.16746e-05
	39.45	1	201	0	201	0	201	0	0	39.53	1	198.999	0.00116109	198.998	0.00232218	199	1.16693e-05	1.16747e-05
	39.27	1	202	0	202	0	202	0	0	39.49	1	199.999	0.00116693	199.998	0.00233386	200	1.16693e-05	1.16747e-05
	39.2	1	203	0	203	0	203	0	0	39.45	1	200.999	0.00117277	200.998	0.00234553	201	1.16693e-05	1.16748e-05
	39.16	1	204	0	204	0	204	0	0	39.27	1	201.999	0.0011786	201.998	0.00235721	202	1.16693e-05	1.16748e-05
	39.06	1	205	0	205	0	205	0	0	39.2	1	202.999	0.00118444	202.998	0.00236888	203	1.16694e-05	1.16749e-05
	38.88	1	206	0	206	0	206	0	0	39.16	1	203.999	0.00119028	203.998	0.00238056	204	1.16694e-05	1.16749e-05
	38.62	1	207	0	207	0	207	0	0	39.06	1	204.999	0.00119612	204.998	0.00239223	205	1.16694e-05	1.1675e-05
	38.48	1	208	0	208	0	208	0	0	38.88	1	205.999	0.00120195	205.998	0.00240391	206	1.16695e-05	1.16751e-05
	38.39	1	209	0	209	0	209	0	0	38.62	1	206.999	0.00120779	206.998	0.00241558	207	1.16695e-05	1.16751e-05
	38.29	1	210	0	210	0	210	0	0	38.48	1	207.999	0.00121363	207.998	0.00242726	208	1.16695e-05	1.16752e-05
	38.14	1	211	0	211	0	211	0	0	38.39	1	208.999	0.00121947	208.998	0.00243893	209	1.16695e-05	1.16752e-05
	38.11	1	212	0	212	0	212	0	0	38.29	1	209.999	0.0012253	209.998	0.00245061	210	1.16696e-05	1.16753e-05
	38.06	1	213	0	213	0	213	0	0	38.14	1	210.999	0.00123114	210.998	0.00246228	211	1.16696e-05	1.16754e-05
	38.03	1	214	0	214	0	214	0	0	38.11	1	211.999	0.00123698	211.998	0.00247396	212	1.16696e-05	1.16754e-05
	37.65	1	215	0	215	0	215	0	0	38.06	1	212.999	0.00124282	212.998	0.00248563	213	1.16696e-05	1.16755e-05
	37.62	1	216	0	216	0	216	0	0	38.03	1	213.999	0.00124865	213.998	0.00249731	214	1.16697e-05	1.16755e-05
	37.59	1	217	0	217	0	217	0	0	37.65	1	214.999	0.00125449	214.997	0.00250899	215	1.16697e-05	1.16756e-05
	37.55	1	218	0	218	0	218	0	0	37.62	1	215.999	0.00126033	215.997	0.00252066	216	1.16697e-05	1.16757e-05
	37.5	1	219	0	219	0	219	0	0	37.59	1	216.999	0.00126617	216.997	0.00253234	217	1.16698e-05	1.16757e-05
	37.45	1	221	0	221	0	221	0	0	37.55	1	217.999	0.00127201	217.997	0.00254401	218	1.16698e-05	1.16758e-05
	37.11	1	222	0	222	0	222	0	0	37.5	1	218.999	0.00127784	218.997	0.00255569	219	1.16698e-05	1.16758e-05
	36.98	1	223	0	223	0	223	0	0	37.45	1	219.999	0.00128368	219.997	0.00256736	220	1.16698e-05	1.16759e-05
	36.83	1	224	0	224	0	224	0	0	37.45	1	220.999	0.00128952	220.997	0.00257904	221	1.16699e-05	1.16759e-05
	36.8	1	225	0	225	0	225	0	0	37.11	1	221.999	0.00129536	221.997	0.00259072	222	1.16699e-05	1.1676e-05
	36.68	1	226	0	226	0	226	0	0	36.98	1	222.999	0.0013012	222.997	0.00260239	223	1.16699e-05	1.16761e-05
	36.55	1	227	0	227	0	227	0	0	36.83	1	223.999	0.00130703	223.997	0.00261407	224	1.16699e-05	1.16761e-05
	36.5	1	228	0	228	0	228	0	0	36.8	1	224.999	0.00131287	224.997	0.00262574	225	1.167e-05	1.16762e-05
	36.43	1	229	0	229	0	229	0	0	36.68	1	225.999	0.00131871	225.997	0.00263742	226	1.167e-05	1.16763e-05
	36.42	1	230	0	230	0	230	0	0	36.55	1	226.999	0.00132455	226.997	0.0026491	227	1.167e-05	1.16763e-05
	36.41	1	231	0	231	0	231	0	0	36.5	1	227.999	0.00133039	227.997	0.00266077	228	1.16701e-05	1.16764e-05
	36.37	1	232	0	232	0	232	0	0	36.43	1	228.999	0.00133622	228.997	0.00267245	229	1.16701e-05	1.16765e-05
	36.32	1	233	0	233	0	233	0	0	36.42	1	229.999	0.00134206	229.997	0.00268413	230	1.16701e-05	1.16765e-05
	36.13	1	234	0	234	0	234	0	0	36.41	1	230.999	0.0013479	230.997	0.0026958	231	1.16701e-05	1.16766e-05
	36	1	235	0	235	0	235	0	0	36.37	1	231.999	0.00135374	231.997	0.00270748	232	1.16702e-05	1.16766e-05
	35.8	1	236	0	236	0	236	0	0	36.32	1	232.999	0.00135958	232.997	0.00271916	233	1.16702e-05	1.16767e-05
	35.69	1	237	0	237	0	237	0	0	36.13	1	233.999	0.00136542	233.997	0.00273083	234	1.16702e-05	1.16768e-05
	35.55	1	238	0	238	0	238	0	0	36	1	234.999	0.00137125	234.997	0.00274251	235	1.16703e-05	1.16768e-05
	35.53	1	239	0	239	0	239	0	0	35.8	1	235.999	0.00137709	235.997	0.00275419	236	1.16703e-05	1.16769e-05
	35.47	1	240	0	240	0	240	0	0	35.69	1	236.999	0.00138293	236.997	0.00276586	237	1.16703e-05	1.16769e-05
	35.45	1	241	0	241	0	241	0	0	35.55	1	237.999	0.00138877	237.997	0.00277754	238	1.16703e-05	1.1677e-05
	35.34	1	242	0	242	0	242	0	0	35.53	1	238.999	0.00139461	238.997	0.00278922	239	1.16704e-05	1.16771e-05
	35.25	1	244	0	244	0	244	0	0	35.47	1	239.999	0.00140045	239.997	0.00280089	240	1.16704e-05	1.16771e-05
	35.23	1	245	0	245	0	245	0	0	35.45	1	240.999	0.00140629	240.997	0.00281257	241	1.16704e-05	1.16772e-05
	35.18	1	246	0	246	0	246	0	0	35.34	1	241.999	0.00141212	241.997	0.00282425	242	1.16705e-05	1.16773e-05
	35.08	1	247	0	247	0	247	0	0	35.25	1	242.999	0.00141796	242.997	0.00283593	243	1.16705e-05	1.16774e-05
	35.04	1	248	0	248	0	248	0	0	35.25	1	243.999	0.0014238	243.997	0.0028476	244	1.16705e-05	1.16774e-05
	34.97	1	249	0	249	0	249	0	0	35.23	1	244.999	0.00142964	244.997	0.00285928	245	1.16705e-05	1.16774e-05
	34.92	1	250	0	250	0	250	0	0	35.18	1	245.999	0.00143548	245.997	0.00287096	246	1.16706e-05	1.16775e-05
	34.81	1	251	0	251	0	251	0	0	35.08	1	246.999	0.00144132	246.997	0.00288264	247	1.16706e-05	1.16776e-05
	34.65	1	252	0	252	0	252	0	0	35.04	1	247.999	0.00144716	247.997	0.00289431	248	1.16706e-05	1.16776e-05
	34.54	1	253	0	253	0	253	0	0	34.97	1	248.999	0.001453	248.997	0.00290599	249	1.16707e-05	1.16777e-05
	34.38	1	254	0	254	0	254	0	0	34.92	1	249.999	0.00145883	249.997	0.00291767	250	1.16707e-05	1.16778e-05
	34.31	1	255	0	255	0	255	0	0	34.81	1	250.999	0.00146467	250.997	0.00292935	251	1.16707e-05	1.16778e-05
	34.22	1	256	0	256	0	256	0	0	34.65	1	251.999	0.00147051	251.997	0.00294103	252	1.16707e-05	1.16779e-05
	34.11	1	257	0	257	0	257	0	0	34.54	1	252.999	0.00147635	252.997	0.0029527	253	1.16708e-05	1.1678e-05
	34.03	1	258	0	258	0	258	0	0	34.38	1	253.999	0.00148219	253.997	0.00296438	254	1.16708e-05	1.1678e-05
	34	1	259	0	259	0	259	0	0	34.31	1	254.999	0.00148803	254.997	0.00297606	255	1.16708e-05	1.16781e-05
	33.87	1	260	0	260	0	260	0	0	34.22	1	255.999	0.00149387	255.997	0.00298774	256	1.16709e-05	1.16781e-05
	33.68	1	261	0	261	0	261	0	0	34.11	1	256.999	0.00149971	256.997	0.00299942	257	1.16709e-05	1.16782e-05
	33.63	1	262	0	262	0	262	0	0	34.03	1	257.998	0.00150555	257.997	0.00301109	258	1.16709e-05	1.16783e-05
	33.62	1	263	0	263	0	263	0	0	34	1	258.998	0.00151139	258.997	0.00302277	259	1.16709e-05	1.16783e-05
	33.53	1	264	0	264	0	264	0	0	33.87	1	259.998	0.00151723	259.997	0.00303445	260	1.1671e-05	1.16784e-05
	33.51	1	265	0	265	0	265	0	0	33.68	1	260.998	0.00152306	260.997	0.00304613	261	1.1671e-05	1.16785e-05
	33.49	1	266	0	266	0	266	0	0	33.63	1	261.998	0.0015289	261.997	0.00305781	262	1.1671e-05	1.16785e-05
	33.48	1	267	0	267	0	267	0	0	33.62	1	262.998	0.00153474	262.997	0.00306949	263	1.16711e-05	1.16786e-05
	33.41	1	268	0	268	0	268	0	0	33.53	1	263.998	0.00154058	263.997	0.00308117	264	1.16711e-05	1.16787e-05
	33.32	1	269	0	269	0	269	0	0	33.51	1	264.998	0.00154642	264.997	0.00309284	265	1.16711e-05	1.16787e-05
	33.19	1	270	0	270	0	270	0	0	33.49	1	265.998	0.00155226	265.997	0.00310452	266	1.16711e-05	1.16788e-05
	33.03	1	272	0	272	0	272	0	0	33.48	1	266.998	0.0015581	266.997	0.0031162	267	1.16712e-05	1.16789e-05
	32.9	1	273	0	273	0	273	0	0	33.41	1	267.998	0.00156394	267.997	0.00312788	268	1.16712e-05	1.16789e-05
	32.78	1	274	0	274	0	274	0	0	33.32	1	268.998	0.00156978	268.997	0.00313956	269	1.16712e-05	1.1679e-05
	32.76	1	275	0	275	0	275	0	0	33.19	1	269.998	0.00157562	269.997	0.00315124	270	1.16713e-05	1.1679e-05
	32.52	1	276	0	276	0	276	0	0	33.03	1	270.998	0.00158146	270.997	0.00316292	271	1.16713e-05	1.16791e-05
	32.5	1	277	0	277	0	277	0	0	33.03	1	271.998	0.0015873	271.997	0.0031746	272	1.16713e-05	1.16791e-05
	32.48	1	278	0	278	0	278	0	0	32.9	1	272.998	0.00159314	272.997	0.00318628	273	1.16713e-05	1.16792e-05
	32.45	1	279	0	279	0	279	0	0	32.78	1	273.998	0.00159898	273.997	0.00319796	274	1.16714e-05	1.16793e-05
	32.44	1	280	0	280	0	280	0	0	32.76	1	274.998	0.00160482	274.997	0.00320963	275	1.16714e-05	1.16794e-05
	32.43	1	281	0	281	0	281	0	0	32.52	1	275.998	0.00161066	275.997	0.00322131	276	1.16714e-05	1.16794e-05
	32.42	1	282	0	282	0	282	0	0	32.5	1	276.998	0.0016165	276.997	0.00323299	277	1.16715e-05	1.16795e-05
	32.39	1	283	0	283	0	283	0	0	32.48	1	277.998	0.00162234	277.997	0.00324467	278	1.16715e-05	1.16796e-05
	32.37	1	284	0	284	0	284	0	0	32.45	1	278.998	0.00162818	278.997	0.00325635	279	1.16715e-05	1.16796e-05
	32.32	1	285	0	285	0	285	0	0	32.44	1	279.998	0.00163402	279.997	0.00326803	280	1.16715e-05	1.16797e-05
	32.21	1	286	0	286	0	286	0	0	32.43	1	280.998	0.00163986	280.997	0.00327971	281	1.16716e-05	1.16798e-05
	32.18	1	287	0	287	0	287	0	0	32.42	1	281.998	0.0016457	281.997	0.00329139	282	1.16716e-05	1.16798e-05
	32.15	1	288	0	288	0	288	0	0	32.39	1	282.998	0.00165154	282.997	0.00330307	283	1.16716e-05	1.16799e-05
	32.07	1	289	0	289	0	289	0	0	32.37	1	283.998	0.00165738	283.997	0.00331475	284	1.16717e-05	1.168e-05
	32.02	1	290	0	290	0	290	0	0	32.32	1	284.998	0.00166322	284.997	0.00332643	285	1.16717e-05	1.168e-05
	31.81	1	292	0	292	0	292	0	0	32.21	1	285.998	0.00166906	285.997	0.00333811	286	1.16717e-05	1.16801e-05
	31.66	1	293	0	293	0	293	0	0	32.18	1	286.998	0.0016749	286.997	0.00334979	287	1.16718e-05	1.16802e-05
	31.65	1	294	0	294	0	294	0	0	32.15	1	287.998	0.00168074	287.997	0.00336147	288	1.16718e-05	1.16802e-05
	31.57	1	296	0	296	0	296	0	0	32.07	1	288.998	0.00168658	288.997	0.00337315	289	1.16718e-05	1.16803e-05
	31.53	1	297	0	297	0	297	0	0	32.02	1	289.998	0.00169242	289.997	0.00338483	290	1.16718e-05	1.16804e-05
	31.47	1	298	0	298	0	298	0	0	31.81	1	290.998	0.00169826	290.997	0.00339651	291	1.16719e-05	1.16805e-05
	31.35	1	299	0	299	0	299	0	0	31.81	1	291.998	0.0017041	291.997	0.00340819	292	1.16719e-05	1.16805e-05
	31.33	1	300	0	300	0	300	0	0	31.66	1	292.998	0.00170994	292.997	0.00341987	293	1.16719e-05	1.16806e-05
	31.18	1	301	0	301	0	301	0	0	31.65	1	293.998	0.00171578	293.997	0.00343156	294	1.1672e-05	1.16806e-05
	31.15	1	302	0	302	0	302	0	0	31.57	1	294.998	0.00172162	294.997	0.00344324	295	1.1672e-05	1.16807e-05
	31.14	1	303	0	303	0	303	0	0	31.57	1	295.998	0.00172746	295.997	0.00345492	296	1.1672e-05	1.16807e-05
	31.13	1	304	0	304	0	304	0	0	31.53	1	296.998	0.0017333	296.997	0.0034666	297	1.1672e-05	1.16808e-05
	31.09	1	306	0	306	0	306	0	0	31.47	1	297.998	0.00173914	297.997	0.00347828	298	1.16721e-05	1.16809e-05
	30.85	1	307	0	307	0	307	0	0	31.35	1	298.998	0.00174498	298.997	0.00348996	299	1.16721e-05	1.1681e-05
	30.73	1	308	0	308	0	308	0	0	31.33	1	299.998	0.00175082	299.996	0.00350164	300	1.16721e-05	1.1681e-05
	30.63	1	309	0	309	0	309	0	0	31.18	1	300.998	0.00175666	300.996	0.00351332	301	1.16722e-05	1.16811e-05
	30.57	1	310	0	310	0	310	0	0	31.15	1	301.998	0.0017625	301.996	0.003525	302	1.16722e-05	1.16812e-05
	30.46	1	311	0	311	0	311	0	0	31.14	1	302.998	0.00176834	302.996	0.00353668	303	1.16722e-05	1.16812e-05
	30.29	1	312	0	312	0	312	0	0	31.13	1	303.998	0.00177418	303.996	0.00354837	304	1.16723e-05	1.16813e-05
	30.08	1	313	0	313	0	313	0	0	31.09	1	304.998	0.00178002	304.996	0.00356005	305	1.16723e-05	1.16814e-05
	29.97	1	314	0	314	0	314	0	0	31.09	1	305.998	0.00178586	305.996	0.00357173	306	1.16723e-05	1.16814e-05
	29.95	1	315	0	315	0	315	0	0	30.85	1	306.998	0.0017917	306.996	0.00358341	307	1.16723e-05	1.16815e-05
	29.85	1	316	0	316	0	316	0	0	30.73	1	307.998	0.00179755	307.996	0.00359509	308	1.16724e-05	1.16816e-05
	29.7	1	317	0	317	0	317	0	0	30.63	1	308.998	0.00180339	308.996	0.00360677	309	1.16724e-05	1.16817e-05
	29.58	1	318	0	318	0	318	0	0	30.57	1	309.998	0.00180923	309.996	0.00361845	310	1.16724e-05	1.16817e-05
	29.57	1	319	0	319	0	319	0	0	30.46	1	310.998	0.00181507	310.996	0.00363014	311	1.16725e-05	1.16818e-05
	29.55	1	320	0	320	0	320	0	0	30.29	1	311.998	0.00182091	311.996	0.00364182	312	1.16725e-05	1.16819e-05
	29.54	1	321	0	321	0	321	0	0	30.08	1	312.998	0.00182675	312.996	0.0036535	313	1.16725e-05	1.16819e-05
	29.33	1	322	0	322	0	322	0	0	29.97	1	313.998	0.00183259	313.996	0.00366518	314	1.16726e-05	1.1682e-05
	29.32	1	323	0	323	0	323	0	0	29.95	1	314.998	0.00183843	314.996	0.00367686	315	1.16726e-05	1.16821e-05
	29.24	1	325	0	325	0	325	0	0	29.85	1	315.998	0.00184427	315.996	0.00368855	316	1.16726e-05	1.16821e-05
	29.22	1	326	0	326	0	326	0	0	29.7	1	316.998	0.00185011	316.996	0.00370023	317	1.16726e-05	1.16822e-05
	29.11	1	327	0	327	0	327	0	0	29.58	1	317.998	0.00185596	317.996	0.00371191	318	1.16727e-05	1.16823e-05
	29.08	1	328	0	328	0	328	0	0	29.57	1	318.998	0.0018618	318.996	0.00372359	319	1.16727e-05	1.16823e-05
	29.03	1	329	0	329	0	329	0	0	29.55	1	319.998	0.00186764	319.996	0.00373528	320	1.16727e-05	1.16824e-05
	28.98	1	330	0	330	0	330	0	0	29.54	1	320.998	0.00187348	320.996	0.00374696	321	1.16728e-05	1.16825e-05
	28.96	1	331	0	331	0	331	0	0	29.33	1	321.998	0.00187932	321.996	0.00375864	322	1.16728e-05	1.16826e-05
	28.84	1	333	0	333	0	333	0	0	29.32	1	322.998	0.00188516	322.996	0.00377032	323	1.16728e-05	1.16826e-05
	28.83	1	334	0	334	0	334	0	0	29.24	1	323.998	0.001891	323.996	0.00378201	324	1.16729e-05	1.16827e-05
	28.77	1	335	0	335	0	335	0	0	29.24	1	324.998	0.00189684	324.996	0.00379369	325	1.16729e-05	1.16827e-05
	28.76	1	336	0	336	0	336	0	0	29.22	1	325.998	0.00190269	325.996	0.00380537	326	1.16729e-05	1.16828e-05
	28.75	1	337	0	337	0	337	0	0	29.11	1	326.998	0.00190853	326.996	0.00381705	327	1.1673e-05	1.16829e-05
	28.7	1	338	0	338	0	338	0	0	29.08	1	327.998	0.00191437	327.996	0.00382874	328	1.1673e-05	1.1683e-05
	28.69	1	339	0	339	0	339	0	0	29.03	1	328.998	0.00192021	328.996	0.00384042	329	1.1673e-05	1.1683e-05
	28.65	1	340	0	340	0	340	0	0	28.98	1	329.998	0.00192605	329.996	0.0038521	330	1.1673e-05	1.16831e-05
	28.55	1	341	0	341	0	341	0	0	28.96	1	330.998	0.00193189	330.996	0.00386379	331	1.16731e-05	1.16832e-05
	28.53	1	342	0	342	0	342	0	0	28.84	1	331.998	0.00193774	331.996	0.00387547	332	1.16731e-05	1.16833e-05
	28.51	1	343	0	343	0	343	0	0	28.84	1	332.998	0.00194358	332.996	0.00388715	333	1.16731e-05	1.16833e-05
	28.32	1	344	0	344	0	344	0	0	28.83	1	333.998	0.00194942	333.996	0.00389884	334	1.16732e-05	1.16834e-05
	28.22	1	345	0	345	0	345	0	0	28.77	1	334.998	0.00195526	334.996	0.00391052	335	1.16732e-05	1.16835e-05
	28.09	1	346	0	346	0	346	0	0	28.76	1	335.998	0.0019611	335.996	0.0039222	336	1.16732e-05	1.16835e-05
	28.06	1	347	0	347	0	347	0	0	28.75	1	336.998	0.00196694	336.996	0.00393389	337	1.16733e-05	1.16836e-05
	28.03	1	348	0	348	0	348	0	0	28.7	1	337.998	0.00197279	337.996	0.00394557	338	1.16733e-05	1.16837e-05
	28	1	349	0	349	0	349	0	0	28.69	1	338.998	0.00197863	338.996	0.00395726	339	1.16733e-05	1.16837e-05
	27.95	1	350	0	350	0	350	0	0	28.65	1	339.998	0.00198447	339.996	0.00396894	340	1.16733e-05	1.16838e-05
	27.93	1	351	0	351	0	351	0	0	28.55	1	340.998	0.00199031	340.996	0.00398062	341	1.16734e-05	1.16839e-05
	27.88	1	352	0	352	0	352	0	0	28.53	1	341.998	0.00199615	341.996	0.00399231	342	1.16734e-05	1.1684e-05
	27.85	1	353	0	353	0	353	0	0	28.51	1	342.998	0.002002	342.996	0.00400399	343	1.16734e-05	1.1684e-05
	27.77	1	354	0	354	0	354	0	0	28.32	1	343.998	0.00200784	343.996	0.00401567	344	1.16735e-05	1.16841e-05
	27.76	1	355	0	355	0	355	0	0	28.22	1	344.998	0.00201368	344.996	0.00402736	345	1.16735e-05	1.16842e-05
	27.54	1	356	0	356	0	356	0	0	28.09	1	345.998	0.00201952	345.996	0.00403904	346	1.16735e-05	1.16842e-05
	27.51	1	357	0	357	0	357	0	0	28.06	1	346.998	0.00202536	346.996	0.00405073	347	1.16736e-05	1.16843e-05
	27.5	1	358	0	358	0	358	0	0	28.03	1	347.998	0.00203121	347.996	0.00406241	348	1.16736e-05	1.16844e-05
	27.48	1	359	0	359	0	359	0	0	28	1	348.998	0.00203705	348.996	0.0040741	349	1.16736e-05	1.16845e-05
	27.38	1	360	0	360	0	360	0	0	27.95	1	349.998	0.00204289	349.996	0.00408578	350	1.16737e-05	1.16845e-05
	27.36	1	361	0	361	0	361	0	0	27.93	1	350.998	0.00204873	350.996	0.00409747	351	1.16737e-05	1.16846e-05
	27.31	1	362	0	362	0	362	0	0	27.88	1	351.998	0.00205458	351.996	0.00410915	352	1.16737e-05	1.16847e-05
	27.29	1	363	0	363	0	363	0	0	27.85	1	352.998	0.00206042	352.996	0.00412083	353	1.16738e-05	1.16847e-05
	27.28	1	364	0	364	0	364	0	0	27.77	1	353.998	0.00206626	353.996	0.00413252	354	1.16738e-05	1.16848e-05
	27.21	1	365	0	365	0	365	0	0	27.76	1	354.998	0.0020721	354.996	0.0041442	355	1.16738e-05	1.16849e-05
	27.16	1	366	0	366	0	366	0	0	27.54	1	355.998	0.00207794	355.996	0.00415589	356	1.16738e-05	1.1685e-05
	27.12	1	367	0	367	0	367	0	0	27.51	1	356.998	0.00208379	356.996	0.00416757	357	1.16739e-05	1.1685e-05
	27.11	1	368	0	368	0	368	0	0	27.5	1	357.998	0.00208963	357.996	0.00417926	358	1.16739e-05	1.16851e-05
	27.03	1	370	0	370	0	370	0	0	27.48	1	358.998	0.00209547	358.996	0.00419094	359	1.16739e-05	1.16852e-05
	26.98	1	371	0	371	0	371	0	0	27.38	1	359.998	0.00210132	359.996	0.00420263	360	1.1674e-05	1.16852e-05
	26.92	1	372	0	372	0	372	0	0	27.36	1	360.998	0.00210716	360.996	0.00421432	361	1.1674e-05	1.16853e-05
	26.8	1	374	0	374	0	374	0	0	27.31	1	361.998	0.002113	361.996	0.004226	362	1.1674e-05	1.16854e-05
	26.72	1	375	0	375	0	375	0	0	27.29	1	362.998	0.00211884	362.996	0.00423769	363	1.16741e-05	1.16855e-05
	26.62	1	376	0	376	0	376	0	0	27.28	1	363.998	0.00212469	363.996	0.00424937	364	1.16741e-05	1.16855e-05
	26.6	1	377	0	377	0	377	0	0	27.21	1	364.998	0.00213053	364.996	0.00426106	365	1.16741e-05	1.16856e-05
	26.44	1	378	0	378	0	378	0	0	27.16	1	365.998	0.00213637	365.996	0.00427274	366	1.16742e-05	1.16857e-05
	26.33	1	379	0	379	0	379	0	0	27.12	1	366.998	0.00214221	366.996	0.00428443	367	1.16742e-05	1.16858e-05
	26.27	1	380	0	380	0	380	0	0	27.11	1	367.998	0.00214806	367.996	0.00429611	368	1.16742e-05	1.16858e-05
	26.23	1	381	0	381	0	381	0	0	27.03	1	368.998	0.0021539	368.996	0.0043078	369	1.16743e-05	1.16859e-05
	26.18	1	382	0	382	0	382	0	0	27.03	1	369.998	0.00215974	369.996	0.00431949	370	1.16743e-05	1.16859e-05
	26.03	1	383	0	383	0	383	0	0	26.98	1	370.998	0.00216559	370.996	0.00433117	371	1.16743e-05	1.1686e-05
	26.02	1	384	0	384	0	384	0	0	26.92	1	371.998	0.00217143	371.996	0.00434286	372	1.16744e-05	1.16861e-05
	26.01	1	385	0	385	0	385	0	0	26.8	1	372.998	0.00217727	372.996	0.00435454	373	1.16744e-05	1.16862e-05
	25.99	1	386	0	386	0	386	0	0	26.8	1	373.998	0.00218312	373.996	0.00436623	374	1.16744e-05	1.16862e-05
	25.92	1	387	0	387	0	387	0	0	26.72	1	374.998	0.00218896	374.996	0.00437792	375	1.16744e-05	1.16863e-05
	25.78	1	388	0	388	0	388	0	0	26.62	1	375.998	0.0021948	375.996	0.0043896	376	1.16745e-05	1.16864e-05
	25.74	1	389	0	389	0	389	0	0	26.6	1	376.998	0.00220065	376.996	0.00440129	377	1.16745e-05	1.16865e-05
	25.71	1	390	0	390	0	390	0	0	26.44	1	377.998	0.00220649	377.996	0.00441298	378	1.16745e-05	1.16866e-05
	25.63	1	391	0	391	0	391	0	0	26.33	1	378.998	0.00221233	378.996	0.00442466	379	1.16746e-05	1.16866e-05
	25.59	1	392	0	392	0	392	0	0	26.27	1	379.998	0.00221818	379.996	0.00443635	380	1.16746e-05	1.16867e-05
	25.51	1	393	0	393	0	393	0	0	26.23	1	380.998	0.00222402	380.996	0.00444804	381	1.16746e-05	1.16868e-05
	25.44	1	394	0	394	0	394	0	0	26.18	1	381.998	0.00222986	381.996	0.00445972	382	1.16747e-05	1.16868e-05
	25.42	1	395	0	395	0	395	0	0	26.03	1	382.998	0.00223571	382.996	0.00447141	383	1.16747e-05	1.16869e-05
	25.34	1	396	0	396	0	396	0	0	26.02	1	383.998	0.00224155	383.996	0.0044831	384	1.16747e-05	1.1687e-05
	25.32	1	397	0	397	0	397	0	0	26.01	1	384.998	0.00224739	384.996	0.00449478	385	1.16748e-05	1.16871e-05
	25.28	1	398	0	398	0	398	0	0	25.99	1	385.998	0.00225324	385.995	0.00450647	386	1.16748e-05	1.16871e-05
	25.26	1	399	0	399	0	399	0	0	25.92	1	386.998	0.00225908	386.995	0.00451816	387	1.16748e-05	1.16872e-05
	25.24	1	401	0	401	0	401	0	0	25.78	1	387.998	0.00226492	387.995	0.00452985	388	1.16749e-05	1.16873e-05
	25.18	1	402	0	402	0	402	0	0	25.74	1	388.998	0.00227077	388.995	0.00454153	389	1.16749e-05	1.16874e-05
	25.09	1	403	0	403	0	403	0	0	25.71	1	389.998	0.00227661	389.995	0.00455322	390	1.16749e-05	1.16874e-05
	25.03	1	404	0	404	0	404	0	0	25.63	1	390.998	0.00228245	390.995	0.00456491	391	1.1675e-05	1.16875e-05
	24.95	1	405	0	405	0	405	0	0	25.59	1	391.998	0.0022883	391.995	0.0045766	392	1.1675e-05	1.16876e-05
	24.94	1	406	0	406	0	406	0	0	25.51	1	392.998	0.00229414	392.995	0.00458828	393	1.1675e-05	1.16877e-05
	24.79	1	407	0	407	0	407	0	0	25.44	1	393.998	0.00229999	393.995	0.00459997	394	1.16751e-05	1.16877e-05
	24.78	1	408	0	408	0	408	0	0	25.42	1	394.998	0.00230583	394.995	0.00461166	395	1.16751e-05	1.16878e-05
	24.69	1	409	0	409	0	409	0	0	25.34	1	395.998	0.00231167	395.995	0.00462335	396	1.16751e-05	1.16879e-05
	24.66	1	410	0	410	0	410	0	0	25.32	1	396.998	0.00231752	396.995	0.00463504	397	1.16752e-05	1.1688e-05
	24.65	1	411	0	411	0	411	0	0	25.28	1	397.998	0.00232336	397.995	0.00464672	398	1.16752e-05	1.1688e-05
	24.62	1	412	0	412	0	412	0	0	25.26	1	398.998	0.00232921	398.995	0.00465841	399	1.16752e-05	1.16881e-05
	24.6	1	413	0	413	0	413	0	0	25.24	1	399.998	0.00233505	399.995	0.0046701	400	1.16752e-05	1.16882e-05
	24.59	1	414	0	414	0	414	0	0	25.24	1	400.998	0.00234089	400.995	0.00468179	401	1.16753e-05	1.16882e-05
	24.56	1	416	0	416	0	416	0	0	25.18	1	401.998	0.00234674	401.995	0.00469348	402	1.16753e-05	1.16883e-05
	24.52	1	417	0	417	0	417	0	0	25.09	1	402.998	0.00235258	402.995	0.00470516	403	1.16753e-05	1.16884e-05
	24.5	1	418	0	418	0	418	0	0	25.03	1	403.998	0.00235843	403.995	0.00471685	404	1.16754e-05	1.16885e-05
	24.48	1	419	0	419	0	419	0	0	24.95	1	404.998	0.00236427	404.995	0.00472854	405	1.16754e-05	1.16886e-05
	24.47	1	420	0	420	0	420	0	0	24.94	1	405.998	0.00237012	405.995	0.00474023	406	1.16754e-05	1.16886e-05
	24.44	1	421	0	421	0	421	0	0	24.79	1	406.998	0.00237596	406.995	0.00475192	407	1.16755e-05	1.16887e-05
	24.38	1	422	0	422	0	422	0	0	24.78	1	407.998	0.0023818	407.995	0.00476361	408	1.16755e-05	1.16888e-05
	24.36	1	423	0	423	0	423	0	0	24.69	1	408.998	0.00238765	408.995	0.0047753	409	1.16755e-05	1.16889e-05
	24.33	1	424	0	424	0	424	0	0	24.66	1	409.998	0.00239349	409.995	0.00478699	410	1.16756e-05	1.16889e-05
	24.28	1	425	0	425	0	425	0	0	24.65	1	410.998	0.00239934	410.995	0.00479867	411	1.16756e-05	1.1689e-05
	24.25	1	426	0	426	0	426	0	0	24.62	1	411.998	0.00240518	411.995	0.00481036	412	1.16756e-05	1.16891e-05
	24.2	1	427	0	427	0	427	0	0	24.6	1	412.998	0.00241103	412.995	0.00482205	413	1.16757e-05	1.16892e-05
	24.12	1	428	0	428	0	428	0	0	24.59	1	413.998	0.00241687	413.995	0.00483374	414	1.16757e-05	1.16892e-05
	24.1	1	429	0	429	0	429	0	0	24.56	1	414.998	0.00242272	414.995	0.00484543	415	1.16757e-05	1.16894e-05
	24.09	1	430	0	430	0	430	0	0	24.56	1	415.998	0.00242856	415.995	0.00485712	416	1.16758e-05	1.16894e-05
	24.07	1	431	0	431	0	431	0	0	24.52	1	416.998	0.00243441	416.995	0.00486881	417	1.16758e-05	1.16895e-05
	24	1	432	0	432	0	432	0	0	24.5	1	417.998	0.00244025	417.995	0.0048805	418	1.16758e-05	1.16895e-05
	23.98	1	434	0	434	0	434	0	0	24.48	1	418.998	0.00244609	418.995	0.00489219	419	1.16759e-05	1.16896e-05
	23.95	1	435	0	435	0	435	0	0	24.47	1	419.998	0.00245194	419.995	0.00490388	420	1.16759e-05	1.16897e-05
	23.92	1	436	0	436	0	436	0	0	24.44	1	420.998	0.00245778	420.995	0.00491557	421	1.16759e-05	1.16898e-05
	23.91	1	437	0	437	0	437	0	0	24.38	1	421.998	0.00246363	421.995	0.00492726	422	1.1676e-05	1.16898e-05
	23.9	1	438	0	438	0	438	0	0	24.36	1	422.998	0.00246947	422.995	0.00493895	423	1.1676e-05	1.16899e-05
	23.88	1	439	0	439	0	439	0	0	24.33	1	423.998	0.00247532	423.995	0.00495064	424	1.1676e-05	1.169e-05
	23.78	1	440	0	440	0	440	0	0	24.28	1	424.998	0.00248116	424.995	0.00496233	425	1.16761e-05	1.16901e-05
	23.71	1	442	0	442	0	442	0	0	24.25	1	425.998	0.00248701	425.995	0.00497402	426	1.16761e-05	1.16902e-05
	23.68	1	443	0	443	0	443	0	0	24.2	1	426.998	0.00249285	426.995	0.00498571	427	1.16761e-05	1.16902e-05
	23.56	1	444	0	444	0	444	0	0	24.12	1	427.998	0.0024987	427.995	0.0049974	428	1.16762e-05	1.16903e-05
	23.54	1	445	0	445	0	445	0	0	24.1	1	428.997	0.00250455	428.995	0.00500909	429	1.16762e-05	1.16904e-05
	23.48	1	446	0	446	0	446	0	0	24.09	1	429.997	0.00251039	429.995	0.00502078	430	1.16762e-05	1.16905e-05
	23.39	1	448	0	448	0	448	0	0	24.07	1	430.997	0.00251624	430.995	0.00503247	431	1.16763e-05	1.16905e-05
	23.36	1	449	0	449	0	449	0	0	24	1	431.997	0.00252208	431.995	0.00504416	432	1.16763e-05	1.16906e-05
	23.22	1	450	0	450	0	450	0	0	23.98	1	432.997	0.00252793	432.995	0.00505585	433	1.16763e-05	1.16907e-05
	23.18	1	452	0	452	0	452	0	0	23.98	1	433.997	0.00253377	433.995	0.00506754	434	1.16764e-05	1.16907e-05
	23.14	1	453	0	453	0	453	0	0	23.95	1	434.997	0.00253962	434.995	0.00507923	435	1.16764e-05	1.16908e-05
	23.05	1	454	0	454	0	454	0	0	23.92	1	435.997	0.00254546	435.995	0.00509092	436	1.16764e-05	1.16909e-05
	23.02	1	456	0	456	0	456	0	0	23.91	1	436.997	0.00255131	436.995	0.00510262	437	1.16765e-05	1.1691e-05
	23	1	458	0	458	0	458	0	0	23.9	1	437.997	0.00255715	437.995	0.00511431	438	1.16765e-05	1.16911e-05
	22.98	1	459	0	459	0	459	0	0	23.88	1	438.997	0.002563	438.995	0.005126	439	1.16765e-05	1.16912e-05
	22.97	1	460	0	460	0	460	0	0	23.78	1	439.997	0.00256884	439.995	0.00513769	440	1.16766e-05	1.16912e-05
	22.96	1	461	0	461	0	461	0	0	23.71	1	440.997	0.00257469	440.995	0.00514938	441	1.16766e-05	1.16914e-05
	22.93	1	462	0	462	0	462	0	0	23.71	1	441.997	0.00258054	441.995	0.00516107	442	1.16766e-05	1.16914e-05
	22.92	1	463	0	463	0	463	0	0	23.68	1	442.997	0.00258638	442.995	0.00517276	443	1.16767e-05	1.16915e-05
	22.85	1	465	0	465	0	465	0	0	23.56	1	443.997	0.00259223	443.995	0.00518446	444	1.16767e-05	1.16915e-05
	22.83	1	466	0	466	0	466	0	0	23.54	1	444.997	0.00259807	444.995	0.00519615	445	1.16767e-05	1.16916e-05
	22.77	1	467	0	467	0	467	0	0	23.48	1	445.997	0.00260392	445.995	0.00520784	446	1.16768e-05	1.16917e-05
	22.75	1	468	0	468	0	468	0	0	23.39	1	446.997	0.00260977	446.995	0.00521953	447	1.16768e-05	1.16918e-05
	22.74	1	470	0	470	0	470	0	0	23.39	1	447.997	0.00261561	447.995	0.00523122	448	1.16768e-05	1.16918e-05
	22.7	1	471	0	471	0	471	0	0	23.36	1	448.997	0.00262146	448.995	0.00524291	449	1.16769e-05	1.16919e-05
	22.68	1	472	0	472	0	472	0	0	23.22	1	449.997	0.0026273	449.995	0.00525461	450	1.16769e-05	1.1692e-05
	22.67	1	473	0	473	0	473	0	0	23.18	1	450.997	0.00263315	450.995	0.0052663	451	1.16769e-05	1.16921e-05
	22.63	1	474	0	474	0	474	0	0	23.18	1	451.997	0.002639	451.995	0.00527799	452	1.1677e-05	1.16921e-05
	22.59	1	476	0	476	0	476	0	0	23.14	1	452.997	0.00264484	452.995	0.00528968	453	1.1677e-05	1.16923e-05
	22.58	1	477	0	477	0	477	0	0	23.05	1	453.997	0.00265069	453.995	0.00530137	454	1.1677e-05	1.16923e-05
	22.48	1	478	0	478	0	478	0	0	23.02	1	454.997	0.00265653	454.995	0.00531307	455	1.16771e-05	1.16925e-05
	22.45	1	479	0	479	0	479	0	0	23.02	1	455.997	0.00266238	455.995	0.00532476	456	1.16771e-05	1.16925e-05
	22.34	1	480	0	480	0	480	0	0	23	1	456.997	0.00266823	456.995	0.00533645	457	1.16771e-05	1.16926e-05
	22.32	1	481	0	481	0	481	0	0	23	1	457.997	0.00267407	457.995	0.00534814	458	1.16772e-05	1.16926e-05
	22.23	1	482	0	482	0	482	0	0	22.98	1	458.997	0.00267992	458.995	0.00535984	459	1.16772e-05	1.16927e-05
	22.21	1	483	0	483	0	483	0	0	22.97	1	459.997	0.00268577	459.995	0.00537153	460	1.16772e-05	1.16928e-05
	22.19	1	485	0	485	0	485	0	0	22.96	1	460.997	0.00269161	460.995	0.00538322	461	1.16773e-05	1.16929e-05
	22.18	1	486	0	486	0	486	0	0	22.93	1	461.997	0.00269746	461.995	0.00539492	462	1.16773e-05	1.1693e-05
	22.15	1	487	0	487	0	487	0	0	22.92	1	462.997	0.0027033	462.995	0.00540661	463	1.16773e-05	1.1693e-05
	22.08	1	488	0	488	0	488	0	0	22.85	1	463.997	0.00270915	463.995	0.0054183	464	1.16774e-05	1.16932e-05
	22.07	1	489	0	489	0	489	0	0	22.85	1	464.997	0.002715	464.995	0.00543	465	1.16774e-05	1.16932e-05
	22.03	1	490	0	490	0	490	0	0	22.83	1	465.997	0.00272084	465.995	0.00544169	466	1.16774e-05	1.16933e-05
	22.01	1	492	0	492	0	492	0	0	22.77	1	466.997	0.00272669	466.995	0.00545338	467	1.16775e-05	1.16934e-05
	22	1	493	0	493	0	493	0	0	22.75	1	467.997	0.00273254	467.995	0.00546508	468	1.16775e-05	1.16934e-05
	21.96	1	494	0	494	0	494	0	0	22.74	1	468.997	0.00273838	468.995	0.00547677	469	1.16775e-05	1.16936e-05
	21.92	1	495	0	495	0	495	0	0	22.74	1	469.997	0.00274423	469.995	0.00548846	470	1.16776e-05	1.16936e-05
	21.8	1	496	0	496	0	496	0	0	22.7	1	470.997	0.00275008	470.994	0.00550016	471	1.16776e-05	1.16937e-05
	21.77	1	497	0	497	0	497	0	0	22.68	1	471.997	0.00275593	471.994	0.00551185	472	1.16776e-05	1.16938e-05
	21.73	1	498	0	498	0	498	0	0	22.67	1	472.997	0.00276177	472.994	0.00552354	473	1.16777e-05	1.16938e-05
	21.68	1	499	0	499	0	499	0	0	22.63	1	473.997	0.00276762	473.994	0.00553524	474	1.16777e-05	1.16939e-05
	21.67	1	500	0	500	0	500	0	0	22.59	1	474.997	0.00277347	474.994	0.00554693	475	1.16778e-05	1.1694e-05
	21.65	1	501	0	501	0	501	0	0	22.59	1	475.997	0.00277931	475.994	0.00555863	476	1.16778e-05	1.1694e-05
	21.64	1	502	0	502	0	502	0	0	22.58	1	476.997	0.00278516	476.994	0.00557032	477	1.16778e-05	1.16942e-05
	21.63	1	503	0	503	0	503	0	0	22.48	1	477.997	0.00279101	477.994	0.00558201	478	1.16779e-05	1.16942e-05
	21.56	1	504	0	504	0	504	0	0	22.45	1	478.997	0.00279685	478.994	0.00559371	479	1.16779e-05	1.16943e-05
	21.52	1	505	0	505	0	505	0	0	22.34	1	479.997	0.0028027	479.994	0.0056054	480	1.16779e-05	1.16944e-05
	21.43	1	506	0	506	0	506	0	0	22.32	1	480.997	0.00280855	480.994	0.0056171	481	1.1678e-05	1.16945e-05
	21.32	1	507	0	507	0	507	0	0	22.23	1	481.997	0.0028144	481.994	0.00562879	482	1.1678e-05	1.16946e-05
	21.22	1	508	0	508	0	508	0	0	22.21	1	482.997	0.00282024	482.994	0.00564049	483	1.1678e-05	1.16947e-05
	21.21	1	509	0	509	0	509	0	0	22.19	1	483.997	0.00282609	483.994	0.00565218	484	1.16781e-05	1.16948e-05
	21.19	1	510	0	510	0	510	0	0	22.19	1	484.997	0.00283194	484.994	0.00566388	485	1.16781e-05	1.16948e-05
	21.18	1	511	0	511	0	511	0	0	22.18	1	485.997	0.00283779	485.994	0.00567557	486	1.16781e-05	1.16949e-05
	21.13	1	512	0	512	0	512	0	0	22.15	1	486.997	0.00284363	486.994	0.00568727	487	1.16782e-05	1.1695e-05
	21.1	1	513	0	513	0	513	0	0	22.08	1	487.997	0.00284948	487.994	0.00569896	488	1.16782e-05	1.16951e-05
	21.08	1	515	0	515	0	515	0	0	22.07	1	488.997	0.00285533	488.994	0.00571066	489	1.16782e-05	1.16951e-05
	20.98	1	516	0	516	0	516	0	0	22.03	1	489.997	0.00286118	489.994	0.00572235	490	1.16783e-05	1.16952e-05
	20.97	1	517	0	517	0	517	0	0	22.01	1	490.997	0.00286702	490.994	0.00573405	491	1.16783e-05	1.16953e-05
	20.95	1	518	0	518	0	518	0	0	22.01	1	491.997	0.00287287	491.994	0.00574574	492	1.16783e-05	1.16953e-05
	20.93	1	520	0	520	0	520	0	0	22	1	492.997	0.00287872	492.994	0.00575744	493	1.16784e-05	1.16955e-05
	20.92	1	521	0	521	0	521	0	0	21.96	1	493.997	0.00288457	493.994	0.00576913	494	1.16784e-05	1.16956e-05
	20.88	1	522	0	522	0	522	0	0	21.92	1	494.997	0.00289041	494.994	0.00578083	495	1.16784e-05	1.16956e-05
	20.87	1	523	0	523	0	523	0	0	21.8	1	495.997	0.00289626	495.994	0.00579253	496	1.16785e-05	1.16957e-05
	20.84	1	524	0	524	0	524	0	0	21.77	1	496.997	0.00290211	496.994	0.00580422	497	1.16785e-05	1.16958e-05
	20.8	1	525	0	525	0	525	0	0	21.73	1	497.997	0.00290796	497.994	0.00581592	498	1.16785e-05	1.16959e-05
	20.76	1	527	0	527	0	527	0	0	21.68	1	498.997	0.00291381	498.994	0.00582761	499	1.16786e-05	1.1696e-05
	20.63	1	528	0	528	0	528	0	0	21.67	1	499.997	0.00291965	499.994	0.00583931	500	1.16786e-05	1.16961e-05
	20.59	1	529	0	529	0	529	0	0	21.65	1	500.997	0.0029255	500.994	0.005851	501	1.16787e-05	1.16961e-05
	20.58	1	530	0	530	0	530	0	0	21.64	1	501.997	0.00293135	501.994	0.0058627	502	1.16787e-05	1.16962e-05
	20.49	1	531	0	531	0	531	0	0	21.63	1	502.997	0.0029372	502.994	0.0058744	503	1.16787e-05	1.16963e-05
	20.45	1	532	0	532	0	532	0	0	21.56	1	503.997	0.00294305	503.994	0.00588609	504	1.16788e-05	1.16964e-05
	20.42	1	533	0	533	0	533	0	0	21.52	1	504.997	0.0029489	504.994	0.00589779	505	1.16788e-05	1.16965e-05
	20.38	1	535	0	535	0	535	0	0	21.43	1	505.997	0.00295474	505.994	0.00590949	506	1.16788e-05	1.16966e-05
	20.35	1	536	0	536	0	536	0	0	21.32	1	506.997	0.00296059	506.994	0.00592118	507	1.16789e-05	1.16966e-05
	20.34	1	537	0	537	0	537	0	0	21.22	1	507.997	0.00296644	507.994	0.00593288	508	1.16789e-05	1.16967e-05
	20.31	1	539	0	539	0	539	0	0	21.21	1	508.997	0.00297229	508.994	0.00594458	509	1.16789e-05	1.16968e-05
	20.3	1	540	0	540	0	540	0	0	21.19	1	509.997	0.00297814	509.994	0.00595627	510	1.1679e-05	1.16969e-05
	20.26	1	541	0	541	0	541	0	0	21.18	1	510.997	0.00298399	510.994	0.00596797	511	1.1679e-05	1.1697e-05
	20.24	1	542	0	542	0	542	0	0	21.13	1	511.997	0.00298983	511.994	0.00597967	512	1.1679e-05	1.16971e-05
	20.21	1	544	0	544	0	544	0	0	21.1	1	512.997	0.00299568	512.994	0.00599137	513	1.16791e-05	1.16971e-05
	20.19	1	545	0	545	0	545	0	0	21.08	1	513.997	0.00300153	513.994	0.00600306	514	1.16791e-05	1.16973e-05
	20.17	1	546	0	546	0	546	0	0	21.08	1	514.997	0.00300738	514.994	0.00601476	515	1.16791e-05	1.16973e-05
	20.13	1	548	0	548	0	548	0	0	20.98	1	515.997	0.00301323	515.994	0.00602646	516	1.16792e-05	1.16974e-05
	20.11	1	549	0	549	0	549	0	0	20.97	1	516.997	0.00301908	516.994	0.00603815	517	1.16792e-05	1.16975e-05
	20.1	1	550	0	550	0	550	0	0	20.95	1	517.997	0.00302493	517.994	0.00604985	518	1.16793e-05	1.16976e-05
	20	1	551	0	551	0	551	0	0	20.93	1	518.997	0.00303077	518.994	0.00606155	519	1.16793e-05	1.16977e-05
	19.98	1	553	0	553	0	553	0	0	20.93	1	519.997	0.00303662	519.994	0.00607325	520	1.16793e-05	1.16977e-05
	19.95	1	554	0	554	0	554	0	0	20.92	1	520.997	0.00304247	520.994	0.00608495	521	1.16794e-05	1.16978e-05
	19.93	1	555	0	555	0	555	0	0	20.88	1	521.997	0.00304832	521.994	0.00609664	522	1.16794e-05	1.16979e-05
	19.92	1	556	0	556	0	556	0	0	20.87	1	522.997	0.00305417	522.994	0.00610834	523	1.16794e-05	1.1698e-05
	19.9	1	557	0	557	0	557	0	0	20.84	1	523.997	0.00306002	523.994	0.00612004	524	1.16795e-05	1.16981e-05
	19.89	1	558	0	558	0	558	0	0	20.8	1	524.997	0.00306587	524.994	0.00613174	525	1.16795e-05	1.16982e-05
	19.84	1	559	0	559	0	559	0	0	20.76	1	525.997	0.00307172	525.994	0.00614344	526	1.16795e-05	1.16983e-05
	19.83	1	561	0	561	0	561	0	0	20.76	1	526.997	0.00307757	526.994	0.00615513	527	1.16796e-05	1.16983e-05
	19.81	1	562	0	562	0	562	0	0	20.63	1	527.997	0.00308342	527.994	0.00616683	528	1.16796e-05	1.16984e-05
	19.8	1	563	0	563	0	563	0	0	20.59	1	528.997	0.00308927	528.994	0.00617853	529	1.16796e-05	1.16985e-05
	19.78	1	564	0	564	0	564	0	0	20.58	1	529.997	0.00309511	529.994	0.00619023	530	1.16797e-05	1.16986e-05
	19.76	1	565	0	565	0	565	0	0	20.49	1	530.997	0.00310096	530.994	0.00620193	531	1.16797e-05	1.16987e-05
	19.74	1	566	0	566	0	566	0	0	20.45	1	531.997	0.00310681	531.994	0.00621363	532	1.16797e-05	1.16988e-05
	19.72	1	567	0	567	0	567	0	0	20.42	1	532.997	0.00311266	532.994	0.00622533	533	1.16798e-05	1.16988e-05
	19.68	1	568	0	568	0	568	0	0	20.38	1	533.997	0.00311851	533.994	0.00623702	534	1.16798e-05	1.1699e-05
	19.67	1	569	0	569	0	569	0	0	20.38	1	534.997	0.00312436	534.994	0.00624872	535	1.16799e-05	1.1699e-05
	19.61	1	570	0	570	0	570	0	0	20.35	1	535.997	0.00313021	535.994	0.00626042	536	1.16799e-05	1.16991e-05
	19.57	1	571	0	571	0	571	0	0	20.34	1	536.997	0.00313606	536.994	0.00627212	537	1.16799e-05	1.16992e-05
	19.54	1	572	0	572	0	572	0	0	20.31	1	537.997	0.00314191	537.994	0.00628382	538	1.168e-05	1.16993e-05
	19.53	1	573	0	573	0	573	0	0	20.31	1	538.997	0.00314776	538.994	0.00629552	539	1.168e-05	1.16993e-05
	19.5	1	574	0	574	0	574	0	0	20.3	1	539.997	0.00315361	539.994	0.00630722	540	1.168e-05	1.16995e-05
	19.49	1	575	0	575	0	575	0	0	20.26	1	540.997	0.00315946	540.994	0.00631892	541	1.16801e-05	1.16995e-05
	19.47	1	576	0	576	0	576	0	0	20.24	1	541.997	0.00316531	541.994	0.00633062	542	1.16801e-05	1.16996e-05
	19.44	1	577	0	577	0	577	0	0	20.21	1	542.997	0.00317116	542.994	0.00634232	543	1.16801e-05	1.16998e-05
	19.43	1	578	0	578	0	578	0	0	20.21	1	543.997	0.00317701	543.994	0.00635402	544	1.16802e-05	1.16998e-05
	19.4	1	580	0	580	0	580	0	0	20.19	1	544.997	0.00318286	544.994	0.00636572	545	1.16802e-05	1.16999e-05
	19.38	1	582	0	582	0	582	0	0	20.17	1	545.997	0.00318871	545.994	0.00637742	546	1.16803e-05	1.17e-05
	19.35	1	584	0	584	0	584	0	0	20.13	1	546.997	0.00319456	546.994	0.00638912	547	1.16803e-05	1.17001e-05
	19.32	1	585	0	585	0	585	0	0	20.13	1	547.997	0.00320041	547.994	0.00640082	548	1.16803e-05	1.17001e-05
	19.3	1	586	0	586	0	586	0	0	20.11	1	548.997	0.00320626	548.994	0.00641252	549	1.16804e-05	1.17002e-05
	19.29	1	587	0	587	0	587	0	0	20.1	1	549.997	0.00321211	549.994	0.00642422	550	1.16804e-05	1.17003e-05
	19.27	1	589	0	589	0	589	0	0	20	1	550.997	0.00321796	550.994	0.00643592	551	1.16804e-05	1.17004e-05
	19.2	1	590	0	590	0	590	0	0	19.98	1	551.997	0.00322381	551.994	0.00644762	552	1.16805e-05	1.17006e-05
	19.15	1	591	0	591	0	591	0	0	19.98	1	552.997	0.00322966	552.994	0.00645932	553	1.16805e-05	1.17006e-05
	19.12	1	592	0	592	0	592	0	0	19.95	1	553.997	0.00323551	553.994	0.00647102	554	1.16805e-05	1.17007e-05
	19.11	1	594	0	594	0	594	0	0	19.93	1	554.997	0.00324136	554.994	0.00648272	555	1.16806e-05	1.17008e-05
	19.1	1	596	0	596	0	596	0	0	19.92	1	555.997	0.00324721	555.994	0.00649442	556	1.16806e-05	1.17009e-05
	18.96	1	597	0	597	0	597	0	0	19.9	1	556.997	0.00325306	556.993	0.00650612	557	1.16807e-05	1.1701e-05
	18.95	1	598	0	598	0	598	0	0	19.89	1	557.997	0.00325891	557.993	0.00651783	558	1.16807e-05	1.1701e-05
	18.92	1	600	0	600	0	600	0	0	19.84	1	558.997	0.00326476	558.993	0.00652953	559	1.16807e-05	1.17011e-05
	18.9	1	601	0	601	0	601	0	0	19.83	1	559.997	0.00327061	559.993	0.00654123	560	1.16808e-05	1.17013e-05
	18.89	1	602	0	602	0	602	0	0	19.83	1	560.997	0.00327646	560.993	0.00655293	561	1.16808e-05	1.17013e-05
	18.88	1	603	0	603	0	603	0	0	19.81	1	561.997	0.00328232	561.993	0.00656463	562	1.16808e-05	1.17014e-05
	18.81	1	604	0	604	0	604	0	0	19.8	1	562.997	0.00328817	562.993	0.00657633	563	1.16809e-05	1.17015e-05
	18.78	1	606	0	606	0	606	0	0	19.78	1	563.997	0.00329402	563.993	0.00658803	564	1.16809e-05	1.17016e-05
	18.77	1	608	0	608	0	608	0	0	19.76	1	564.997	0.00329987	564.993	0.00659974	565	1.16809e-05	1.17017e-05
	18.74	1	610	0	610	0	610	0	0	19.74	1	565.997	0.00330572	565.993	0.00661144	566	1.1681e-05	1.17018e-05
	18.7	1	611	0	611	0	611	0	0	19.72	1	566.997	0.00331157	566.993	0.00662314	567	1.1681e-05	1.17019e-05
	18.69	1	612	0	612	0	612	0	0	19.68	1	567.997	0.00331742	567.993	0.00663484	568	1.16811e-05	1.1702e-05
	18.65	1	613	0	613	0	613	0	0	19.67	1	568.997	0.00332327	568.993	0.00664654	569	1.16811e-05	1.1702e-05
	18.61	1	615	0	615	0	615	0	0	19.61	1	569.997	0.00332912	569.993	0.00665824	570	1.16811e-05	1.17021e-05
	18.58	1	616	0	616	0	616	0	0	19.57	1	570.997	0.00333497	570.993	0.00666995	571	1.16812e-05	1.17022e-05
	18.57	1	617	0	617	0	617	0	0	19.54	1	571.997	0.00334082	571.993	0.00668165	572	1.16812e-05	1.17023e-05
	18.52	1	618	0	618	0	618	0	0	19.53	1	572.997	0.00334668	572.993	0.00669335	573	1.16812e-05	1.17024e-05
	18.5	1	619	0	619	0	619	0	0	19.5	1	573.997	0.00335253	573.993	0.00670505	574	1.16813e-05	1.17025e-05
	18.48	1	620	0	620	0	620	0	0	19.49	1	574.997	0.00335838	574.993	0.00671676	575	1.16813e-05	1.17026e-05
	18.38	1	621	0	621	0	621	0	0	19.47	1	575.997	0.00336423	575.993	0.00672846	576	1.16814e-05	1.17027e-05
	18.36	1	623	0	623	0	623	0	0	19.44	1	576.997	0.00337008	576.993	0.00674016	577	1.16814e-05	1.17028e-05
	18.34	1	624	0	624	0	624	0	0	19.43	1	577.997	0.00337593	577.993	0.00675187	578	1.16814e-05	1.17029e-05
	18.32	1	625	0	625	0	625	0	0	19.4	1	578.997	0.00338178	578.993	0.00676357	579	1.16815e-05	1.1703e-05
	18.31	1	627	0	627	0	627	0	0	19.4	1	579.997	0.00338764	579.993	0.00677527	580	1.16815e-05	1.1703e-05
	18.24	1	628	0	628	0	628	0	0	19.38	1	580.997	0.00339349	580.993	0.00678697	581	1.16815e-05	1.17032e-05
	18.22	1	629	0	629	0	629	0	0	19.38	1	581.997	0.00339934	581.993	0.00679868	582	1.16816e-05	1.17032e-05
	18.2	1	630	0	630	0	630	0	0	19.35	1	582.997	0.00340519	582.993	0.00681038	583	1.16816e-05	1.17034e-05
	18.11	1	631	0	631	0	631	0	0	19.35	1	583.997	0.00341104	583.993	0.00682208	584	1.16817e-05	1.17034e-05
	18.08	1	632	0	632	0	632	0	0	19.32	1	584.997	0.00341689	584.993	0.00683379	585	1.16817e-05	1.17035e-05
	18.04	1	633	0	633	0	633	0	0	19.3	1	585.997	0.00342275	585.993	0.00684549	586	1.16817e-05	1.17036e-05
	17.97	1	634	0	634	0	634	0	0	19.29	1	586.997	0.0034286	586.993	0.0068572	587	1.16818e-05	1.17037e-05
	17.95	1	635	0	635	0	635	0	0	19.27	1	587.997	0.00343445	587.993	0.0068689	588	1.16818e-05	1.17038e-05
	17.94	1	636	0	636	0	636	0	0	19.27	1	588.997	0.0034403	588.993	0.0068806	589	1.16818e-05	1.17038e-05
	17.9	1	637	0	637	0	637	0	0	19.2	1	589.997	0.00344615	589.993	0.00689231	590	1.16819e-05	1.1704e-05
	17.89	1	638	0	638	0	638	0	0	19.15	1	590.997	0.00345201	590.993	0.00690401	591	1.16819e-05	1.17041e-05
	17.88	1	641	0	641	0	641	0	0	19.12	1	591.997	0.00345786	591.993	0.00691572	592	1.1682e-05	1.17042e-05
	17.87	1	643	0	643	0	643	0	0	19.11	1	592.997	0.00346371	592.993	0.00692742	593	1.1682e-05	1.17043e-05
	17.86	1	644	0	644	0	644	0	0	19.11	1	593.997	0.00346956	593.993	0.00693912	594	1.1682e-05	1.17043e-05
	17.85	1	646	0	646	0	646	0	0	19.1	1	594.997	0.00347541	594.993	0.00695083	595	1.16821e-05	1.17045e-05
	17.82	1	647	0	647	0	647	0	0	19.1	1	595.997	0.00348127	595.993	0.00696253	596	1.16821e-05	1.17045e-05
	17.79	1	648	0	648	0	648	0	0	18.96	1	596.997	0.00348712	596.993	0.00697424	597	1.16821e-05	1.17047e-05
	17.78	1	649	0	649	0	649	0	0	18.95	1	597.997	0.00349297	597.993	0.00698594	598	1.16822e-05	1.17047e-05
	17.74	1	650	0	650	0	650	0	0	18.92	1	598.997	0.00349882	598.993	0.00699765	599	1.16822e-05	1.17049e-05
	17.71	1	652	0	652	0	652	0	0	18.92	1	599.996	0.00350468	599.993	0.00700935	600	1.16823e-05	1.17049e-05
	17.66	1	653	0	653	0	653	0	0	18.9	1	600.996	0.00351053	600.993	0.00702106	601	1.16823e-05	1.1705e-05
	17.6	1	654	0	654	0	654	0	0	18.89	1	601.996	0.00351638	601.993	0.00703276	602	1.16823e-05	1.17051e-05
	17.58	1	656	0	656	0	656	0	0	18.88	1	602.996	0.00352223	602.993	0.00704447	603	1.16824e-05	1.17052e-05
	17.57	1	657	0	657	0	657	0	0	18.81	1	603.996	0.00352809	603.993	0.00705617	604	1.16824e-05	1.17053e-05
	17.56	1	658	0	658	0	658	0	0	18.78	1	604.996	0.00353394	604.993	0.00706788	605	1.16824e-05	1.17055e-05
	17.55	1	659	0	659	0	659	0	0	18.78	1	605.996	0.00353979	605.993	0.00707958	606	1.16825e-05	1.17055e-05
	17.52	1	660	0	660	0	660	0	0	18.77	1	606.996	0.00354564	606.993	0.00709129	607	1.16825e-05	1.17057e-05
	17.5	1	662	0	662	0	662	0	0	18.77	1	607.996	0.0035515	607.993	0.007103	608	1.16826e-05	1.17057e-05
	17.49	1	663	0	663	0	663	0	0	18.74	1	608.996	0.00355735	608.993	0.0071147	609	1.16826e-05	1.17059e-05
	17.48	1	664	0	664	0	664	0	0	18.74	1	609.996	0.0035632	609.993	0.00712641	610	1.16826e-05	1.17059e-05
	17.44	1	665	0	665	0	665	0	0	18.7	1	610.996	0.00356906	610.993	0.00713811	611	1.16827e-05	1.1706e-05
	17.43	1	666	0	666	0	666	0	0	18.69	1	611.996	0.00357491	611.993	0.00714982	612	1.16827e-05	1.17061e-05
	17.41	1	667	0	667	0	667	0	0	18.65	1	612.996	0.00358076	612.993	0.00716153	613	1.16827e-05	1.17062e-05
	17.37	1	668	0	668	0	668	0	0	18.61	1	613.996	0.00358662	613.993	0.00717323	614	1.16828e-05	1.17063e-05
	17.34	1	669	0	669	0	669	0	0	18.61	1	614.996	0.00359247	614.993	0.00718494	615	1.16828e-05	1.17063e-05
	17.29	1	671	0	671	0	671	0	0	18.58	1	615.996	0.00359832	615.993	0.00719664	616	1.16829e-05	1.17065e-05
	17.27	1	673	0	673	0	673	0	0	18.57	1	616.996	0.00360418	616.993	0.00720835	617	1.16829e-05	1.17066e-05
	17.26	1	675	0	675	0	675	0	0	18.52	1	617.996	0.00361003	617.993	0.00722006	618	1.16829e-05	1.17067e-05
	17.25	1	676	0	676	0	676	0	0	18.5	1	618.996	0.00361588	618.993	0.00723176	619	1.1683e-05	1.17068e-05
	17.16	1	677	0	677	0	677	0	0	18.48	1	619.996	0.00362174	619.993	0.00724347	620	1.1683e-05	1.17069e-05
	17.15	1	679	0	679	0	679	0	0	18.38	1	620.996	0.00362759	620.993	0.00725518	621	1.16831e-05	1.1707e-05
	17.14	1	680	0	680	0	680	0	0	18.36	1	621.996	0.00363344	621.993	0.00726689	622	1.16831e-05	1.17071e-05
	17.12	1	681	0	681	0	681	0	0	18.36	1	622.996	0.0036393	622.993	0.00727859	623	1.16831e-05	1.17071e-05
	17.09	1	683	0	683	0	683	0	0	18.34	1	623.996	0.00364515	623.993	0.0072903	624	1.16832e-05	1.17073e-05
	17.08	1	684	0	684	0	684	0	0	18.32	1	624.996	0.003651	624.993	0.00730201	625	1.16832e-05	1.17074e-05
	17.06	1	687	0	687	0	687	0	0	18.31	1	625.996	0.00365686	625.993	0.00731371	626	1.16833e-05	1.17075e-05
	17.03	1	689	0	689	0	689	0	0	18.31	1	626.996	0.00366271	626.993	0.00732542	627	1.16833e-05	1.17075e-05
	17.01	1	690	0	690	0	690	0	0	18.24	1	627.996	0.00366856	627.993	0.00733713	628	1.16833e-05	1.17077e-05
	17	1	691	0	691	0	691	0	0	18.22	1	628.996	0.00367442	628.993	0.00734884	629	1.16834e-05	1.17078e-05
	16.97	1	692	0	692	0	692	0	0	18.2	1	629.996	0.00368027	629.993	0.00736055	630	1.16834e-05	1.17079e-05
	16.96	1	693	0	693	0	693	0	0	18.11	1	630.996	0.00368613	630.993	0.00737225	631	1.16834e-05	1.1708e-05
	16.95	1	694	0	694	0	694	0	0	18.08	1	631.996	0.00369198	631.993	0.00738396	632	1.16835e-05	1.17081e-05
	16.94	1	695	0	695	0	695	0	0	18.04	1	632.996	0.00369783	632.993	0.00739567	633	1.16835e-05	1.17082e-05
	16.93	1	696	0	696	0	696	0	0	17.97	1	633.996	0.00370369	633.993	0.00740738	634	1.16836e-05	1.17083e-05
	16.9	1	698	0	698	0	698	0	0	17.95	1	634.996	0.00370954	634.993	0.00741909	635	1.16836e-05	1.17084e-05
	16.88	1	700	0	700	0	700	0	0	17.94	1	635.996	0.0037154	635.993	0.00743079	636	1.16836e-05	1.17085e-05
	16.87	1	702	0	702	0	702	0	0	17.9	1	636.996	0.00372125	636.993	0.0074425	637	1.16837e-05	1.17086e-05
	16.86	1	703	0	703	0	703	0	0	17.89	1	637.996	0.00372711	637.993	0.00745421	638	1.16837e-05	1.17087e-05
	16.82	1	705	0	705	0	705	0	0	17.88	1	638.996	0.00373296	638.993	0.00746592	639	1.16838e-05	1.17089e-05
	16.8	1	706	0	706	0	706	0	0	17.88	1	639.996	0.00373881	639.993	0.00747763	640	1.16838e-05	1.17089e-05
	16.75	1	707	0	707	0	707	0	0	17.88	1	640.996	0.00374467	640.993	0.00748934	641	1.16838e-05	1.17089e-05
	16.71	1	708	0	708	0	708	0	0	17.87	1	641.996	0.00375052	641.992	0.00750105	642	1.16839e-05	1.17092e-05
	16.69	1	709	0	709	0	709	0	0	17.87	1	642.996	0.00375638	642.992	0.00751276	643	1.16839e-05	1.17092e-05
	16.61	1	710	0	710	0	710	0	0	17.86	1	643.996	0.00376223	643.992	0.00752447	644	1.1684e-05	1.17093e-05
	16.58	1	711	0	711	0	711	0	0	17.85	1	644.996	0.00376809	644.992	0.00753618	645	1.1684e-05	1.17095e-05
	16.57	1	712	0	712	0	712	0	0	17.85	1	645.996	0.00377394	645.992	0.00754789	646	1.1684e-05	1.17095e-05
	16.56	1	713	0	713	0	713	0	0	17.82	1	646.996	0.0037798	646.992	0.0075596	647	1.16841e-05	1.17096e-05
	16.52	1	714	0	714	0	714	0	0	17.79	1	647.996	0.00378565	647.992	0.0075713	648	1.16841e-05	1.17097e-05
	16.5	1	715	0	715	0	715	0	0	17.78	1	648.996	0.00379151	648.992	0.00758301	649	1.16842e-05	1.17098e-05
	16.49	1	716	0	716	0	716	0	0	17.74	1	649.996	0.00379736	649.992	0.00759472	650	1.16842e-05	1.17099e-05
	16.45	1	717	0	717	0	717	0	0	17.71	1	650.996	0.00380322	650.992	0.00760643	651	1.16842e-05	1.17101e-05
	16.44	1	718	0	718	0	718	0	0	17.71	1	651.996	0.00380907	651.992	0.00761814	652	1.16843e-05	1.17101e-05
	16.43	1	719	0	719	0	719	0	0	17.66	1	652.996	0.00381493	652.992	0.00762986	653	1.16843e-05	1.17103e-05
	16.42	1	723	0	723	0	723	0	0	17.6	1	653.996	0.00382078	653.992	0.00764157	654	1.16844e-05	1.17104e-05
	16.41	1	724	0	724	0	724	0	0	17.58	1	654.996	0.00382664	654.992	0.00765328	655	1.16844e-05	1.17105e-05
	16.4	1	725	0	725	0	725	0	0	17.58	1	655.996	0.00383249	655.992	0.00766499	656	1.16844e-05	1.17105e-05
	16.38	1	727	0	727	0	727	0	0	17.57	1	656.996	0.00383835	656.992	0.0076767	657	1.16845e-05	1.17107e-05
	16.37	1	728	0	728	0	728	0	0	17.56	1	657.996	0.0038442	657.992	0.00768841	658	1.16845e-05	1.17108e-05
	16.36	1	730	0	730	0	730	0	0	17.55	1	658.996	0.00385006	658.992	0.00770012	659	1.16846e-05	1.17109e-05
	16.34	1	732	0	732	0	732	0	0	17.52	1	659.996	0.00385591	659.992	0.00771183	660	1.16846e-05	1.1711e-05
	16.32	1	733	0	733	0	733	0	0	17.5	1	660.996	0.00386177	660.992	0.00772354	661	1.16846e-05	1.17112e-05
	16.31	1	734	0	734	0	734	0	0	17.5	1	661.996	0.00386763	661.992	0.00773525	662	1.16847e-05	1.17112e-05
	16.28	1	736	0	736	0	736	0	0	17.49	1	662.996	0.00387348	662.992	0.00774696	663	1.16847e-05	1.17113e-05
	16.27	1	737	0	737	0	737	0	0	17.48	1	663.996	0.00387934	663.992	0.00775867	664	1.16848e-05	1.17114e-05
	16.25	1	738	0	738	0	738	0	0	17.44	1	664.996	0.00388519	664.992	0.00777039	665	1.16848e-05	1.17115e-05
	16.24	1	739	0	739	0	739	0	0	17.43	1	665.996	0.00389105	665.992	0.0077821	666	1.16848e-05	1.17116e-05
	16.21	1	740	0	740	0	740	0	0	17.41	1	666.996	0.0038969	666.992	0.00779381	667	1.16849e-05	1.17118e-05
	16.19	1	741	0	741	0	741	0	0	17.37	1	667.996	0.00390276	667.992	0.00780552	668	1.16849e-05	1.17119e-05
	16.16	1	742	0	742	0	742	0	0	17.34	1	668.996	0.00390862	668.992	0.00781723	669	1.1685e-05	1.1712e-05
	16.13	1	743	0	743	0	743	0	0	17.29	1	669.996	0.00391447	669.992	0.00782895	670	1.1685e-05	1.17121e-05
	16.12	1	744	0	744	0	744	0	0	17.29	1	670.996	0.00392033	670.992	0.00784066	671	1.1685e-05	1.17121e-05
	16.11	1	746	0	746	0	746	0	0	17.27	1	671.996	0.00392619	671.992	0.00785237	672	1.16851e-05	1.17124e-05
	16.09	1	747	0	747	0	747	0	0	17.27	1	672.996	0.00393204	672.992	0.00786408	673	1.16851e-05	1.17124e-05
	16.08	1	748	0	748	0	748	0	0	17.26	1	673.996	0.0039379	673.992	0.0078758	674	1.16852e-05	1.17126e-05
	16.05	1	749	0	749	0	749	0	0	17.26	1	674.996	0.00394375	674.992	0.00788751	675	1.16852e-05	1.17126e-05
	16.04	1	751	0	751	0	751	0	0	17.25	1	675.996	0.00394961	675.992	0.00789922	676	1.16852e-05	1.17127e-05
	16.02	1	752	0	752	0	752	0	0	17.16	1	676.996	0.00395547	676.992	0.00791093	677	1.16853e-05	1.17128e-05
	15.99	1	753	0	753	0	753	0	0	17.15	1	677.996	0.00396132	677.992	0.00792265	678	1.16853e-05	1.1713e-05
	15.98	1	754	0	754	0	754	0	0	17.15	1	678.996	0.00396718	678.992	0.00793436	679	1.16854e-05	1.1713e-05
	15.97	1	755	0	755	0	755	0	0	17.14	1	679.996	0.00397304	679.992	0.00794607	680	1.16854e-05	1.17132e-05
	15.96	1	756	0	756	0	756	0	0	17.12	1	680.996	0.00397889	680.992	0.00795779	681	1.16854e-05	1.17133e-05
	15.94	1	757	0	757	0	757	0	0	17.09	1	681.996	0.00398475	681.992	0.0079695	682	1.16855e-05	1.17135e-05
	15.92	1	758	0	758	0	758	0	0	17.09	1	682.996	0.00399061	682.992	0.00798121	683	1.16855e-05	1.17135e-05
	15.91	1	759	0	759	0	759	0	0	17.08	1	683.996	0.00399646	683.992	0.00799293	684	1.16856e-05	1.17136e-05
	15.83	1	760	0	760	0	760	0	0	17.06	1	684.996	0.00400232	684.992	0.00800464	685	1.16856e-05	1.17139e-05
	15.81	1	761	0	761	0	761	0	0	17.06	1	685.996	0.00400818	685.992	0.00801635	686	1.16856e-05	1.17139e-05
	15.8	1	762	0	762	0	762	0	0	17.06	1	686.996	0.00401403	686.992	0.00802807	687	1.16857e-05	1.17139e-05
	15.79	1	763	0	763	0	763	0	0	17.03	1	687.996	0.00401989	687.992	0.00803978	688	1.16857e-05	1.17141e-05
	15.77	1	764	0	764	0	764	0	0	17.03	1	688.996	0.00402575	688.992	0.0080515	689	1.16858e-05	1.17141e-05
	15.67	1	766	0	766	0	766	0	0	17.01	1	689.996	0.00403161	689.992	0.00806321	690	1.16858e-05	1.17143e-05
	15.64	1	767	0	767	0	767	0	0	17	1	690.996	0.00403746	690.992	0.00807493	691	1.16859e-05	1.17144e-05
	15.62	1	768	0	768	0	768	0	0	16.97	1	691.996	0.00404332	691.992	0.00808664	692	1.16859e-05	1.17145e-05
	15.61	1	769	0	769	0	769	0	0	16.96	1	692.996	0.00404918	692.992	0.00809835	693	1.16859e-05	1.17147e-05
	15.54	1	770	0	770	0	770	0	0	16.95	1	693.996	0.00405503	693.992	0.00811007	694	1.1686e-05	1.17148e-05
	15.53	1	771	0	771	0	771	0	0	16.94	1	694.996	0.00406089	694.992	0.00812178	695	1.1686e-05	1.17149e-05
	15.5	1	773	0	773	0	773	0	0	16.93	1	695.996	0.00406675	695.992	0.0081335	696	1.16861e-05	1.1715e-05
	15.49	1	774	0	774	0	774	0	0	16.9	1	696.996	0.00407261	696.992	0.00814521	697	1.16861e-05	1.17152e-05
	15.48	1	777	0	777	0	777	0	0	16.9	1	697.996	0.00407846	697.992	0.00815693	698	1.16861e-05	1.17152e-05
	15.47	1	778	0	778	0	778	0	0	16.88	1	698.996	0.00408432	698.992	0.00816864	699	1.16862e-05	1.17154e-05
	15.44	1	779	0	779	0	779	0	0	16.88	1	699.996	0.00409018	699.992	0.00818036	700	1.16862e-05	1.17154e-05
	15.39	1	782	0	782	0	782	0	0	16.87	1	700.996	0.00409604	700.992	0.00819208	701	1.16863e-05	1.17156e-05
	15.36	1	783	0	783	0	783	0	0	16.87	1	701.996	0.0041019	701.992	0.00820379	702	1.16863e-05	1.17156e-05
	15.34	1	784	0	784	0	784	0	0	16.86	1	702.996	0.00410775	702.992	0.00821551	703	1.16864e-05	1.17158e-05
	15.31	1	785	0	785	0	785	0	0	16.82	1	703.996	0.00411361	703.992	0.00822722	704	1.16864e-05	1.1716e-05
	15.29	1	786	0	786	0	786	0	0	16.82	1	704.996	0.00411947	704.992	0.00823894	705	1.16864e-05	1.1716e-05
	15.28	1	787	0	787	0	787	0	0	16.8	1	705.996	0.00412533	705.992	0.00825066	706	1.16865e-05	1.17162e-05
	15.26	1	789	0	789	0	789	0	0	16.75	1	706.996	0.00413119	706.992	0.00826237	707	1.16865e-05	1.17163e-05
	15.2	1	790	0	790	0	790	0	0	16.71	1	707.996	0.00413704	707.992	0.00827409	708	1.16866e-05	1.17164e-05
	15.19	1	792	0	792	0	792	0	0	16.69	1	708.996	0.0041429	708.992	0.0082858	709	1.16866e-05	1.17165e-05
	15.18	1	794	0	794	0	794	0	0	16.61	1	709.996	0.00414876	709.992	0.00829752	710	1.16866e-05	1.17166e-05
	15.16	1	795	0	795	0	795	0	0	16.58	1	710.996	0.00415462	710.992	0.00830924	711	1.16867e-05	1.17168e-05
	15.15	1	796	0	796	0	796	0	0	16.57	1	711.996	0.00416048	711.992	0.00832095	712	1.16867e-05	1.17169e-05
	15.14	1	797	0	797	0	797	0	0	16.56	1	712.996	0.00416634	712.992	0.00833267	713	1.16868e-05	1.1717e-05
	15.13	1	798	0	798	0	798	0	0	16.52	1	713.996	0.00417219	713.992	0.00834439	714	1.16868e-05	1.17171e-05
	15.12	1	799	0	799	0	799	0	0	16.5	1	714.996	0.00417805	714.992	0.00835611	715	1.16869e-05	1.17172e-05
	15.11	1	800	0	800	0	800	0	0	16.49	1	715.996	0.00418391	715.992	0.00836782	716	1.16869e-05	1.17174e-05
	15.08	1	801	0	801	0	801	0	0	16.45	1	716.996	0.00418977	716.992	0.00837954	717	1.16869e-05	1.17175e-05
	15.07	1	802	0	802	0	802	0	0	16.44	1	717.996	0.00419563	717.992	0.00839126	718	1.1687e-05	1.17176e-05
	15.03	1	803	0	803	0	803	0	0	16.43	1	718.996	0.00420149	718.992	0.00840298	719	1.1687e-05	1.17177e-05
	15.02	1	805	0	805	0	805	0	0	16.42	1	719.996	0.00420735	719.992	0.00841469	720	1.16871e-05	1.1718e-05
	14.99	1	806	0	806	0	806	0	0	16.42	1	720.996	0.00421321	720.992	0.00842641	721	1.16871e-05	1.1718e-05
	14.98	1	808	0	808	0	808	0	0	16.42	1	721.996	0.00421907	721.992	0.00843813	722	1.16872e-05	1.1718e-05
	14.96	1	809	0	809	0	809	0	0	16.42	1	722.996	0.00422492	722.992	0.00844985	723	1.16872e-05	1.1718e-05
	14.94	1	810	0	810	0	810	0	0	16.41	1	723.996	0.00423078	723.992	0.00846157	724	1.16872e-05	1.17183e-05
	14.93	1	811	0	811	0	811	0	0	16.4	1	724.996	0.00423664	724.992	0.00847329	725	1.16873e-05	1.17185e-05
	14.9	1	814	0	814	0	814	0	0	16.38	1	725.996	0.0042425	725.992	0.008485	726	1.16873e-05	1.17186e-05
	14.87	1	816	0	816	0	816	0	0	16.38	1	726.996	0.00424836	726.992	0.00849672	727	1.16874e-05	1.17186e-05
	14.85	1	817	0	817	0	817	0	0	16.37	1	727.996	0.00425422	727.991	0.00850844	728	1.16874e-05	1.17188e-05
	14.84	1	819	0	819	0	819	0	0	16.36	1	728.996	0.00426008	728.991	0.00852016	729	1.16875e-05	1.1719e-05
	14.8	1	821	0	821	0	821	0	0	16.36	1	729.996	0.00426594	729.991	0.00853188	730	1.16875e-05	1.1719e-05
	14.79	1	822	0	822	0	822	0	0	16.34	1	730.996	0.0042718	730.991	0.0085436	731	1.16875e-05	1.17193e-05
	14.77	1	823	0	823	0	823	0	0	16.34	1	731.996	0.00427766	731.991	0.00855532	732	1.16876e-05	1.17193e-05
	14.74	1	826	0	826	0	826	0	0	16.32	1	732.996	0.00428352	732.991	0.00856704	733	1.16876e-05	1.17195e-05
	14.73	1	827	0	827	0	827	0	0	16.31	1	733.996	0.00428938	733.991	0.00857876	734	1.16877e-05	1.17196e-05
	14.7	1	828	0	828	0	828	0	0	16.28	1	734.996	0.00429524	734.991	0.00859048	735	1.16877e-05	1.17198e-05
	14.69	1	830	0	830	0	830	0	0	16.28	1	735.996	0.0043011	735.991	0.0086022	736	1.16878e-05	1.17198e-05
	14.67	1	831	0	831	0	831	0	0	16.27	1	736.996	0.00430696	736.991	0.00861392	737	1.16878e-05	1.172e-05
	14.62	1	832	0	832	0	832	0	0	16.25	1	737.996	0.00431282	737.991	0.00862564	738	1.16879e-05	1.17201e-05
	14.61	1	833	0	833	0	833	0	0	16.24	1	738.996	0.00431868	738.991	0.00863736	739	1.16879e-05	1.17202e-05
	14.6	1	834	0	834	0	834	0	0	16.21	1	739.996	0.00432454	739.991	0.00864908	740	1.16879e-05	1.17203e-05
	14.59	1	835	0	835	0	835	0	0	16.19	1	740.996	0.0043304	740.991	0.0086608	741	1.1688e-05	1.17205e-05
	14.58	1	837	0	837	0	837	0	0	16.16	1	741.996	0.00433626	741.991	0.00867252	742	1.1688e-05	1.17206e-05
	14.57	1	838	0	838	0	838	0	0	16.13	1	742.996	0.00434212	742.991	0.00868424	743	1.16881e-05	1.17207e-05
	14.56	1	839	0	839	0	839	0	0	16.12	1	743.996	0.00434798	743.991	0.00869596	744	1.16881e-05	1.17209e-05
	14.53	1	841	0	841	0	841	0	0	16.11	1	744.996	0.00435384	744.991	0.00870768	745	1.16882e-05	1.17211e-05
	14.51	1	842	0	842	0	842	0	0	16.11	1	745.996	0.0043597	745.991	0.0087194	746	1.16882e-05	1.17211e-05
	14.5	1	844	0	844	0	844	0	0	16.09	1	746.996	0.00436556	746.991	0.00873112	747	1.16883e-05	1.17212e-05
	14.48	1	845	0	845	0	845	0	0	16.08	1	747.996	0.00437142	747.991	0.00874284	748	1.16883e-05	1.17214e-05
	14.44	1	848	0	848	0	848	0	0	16.05	1	748.996	0.00437728	748.991	0.00875457	749	1.16883e-05	1.17215e-05
	14.42	1	849	0	849	0	849	0	0	16.04	1	749.996	0.00438314	749.991	0.00876629	750	1.16884e-05	1.17217e-05
	14.39	1	850	0	850	0	850	0	0	16.04	1	750.996	0.004389	750.991	0.00877801	751	1.16884e-05	1.17217e-05
	14.37	1	851	0	851	0	851	0	0	16.02	1	751.996	0.00439487	751.991	0.00878973	752	1.16885e-05	1.17219e-05
	14.36	1	852	0	852	0	852	0	0	15.99	1	752.996	0.00440073	752.991	0.00880145	753	1.16885e-05	1.1722e-05
	14.34	1	854	0	854	0	854	0	0	15.98	1	753.996	0.00440659	753.991	0.00881318	754	1.16886e-05	1.17222e-05
	14.31	1	855	0	855	0	855	0	0	15.97	1	754.996	0.00441245	754.991	0.0088249	755	1.16886e-05	1.17223e-05
	14.29	1	857	0	857	0	857	0	0	15.96	1	755.996	0.00441831	755.991	0.00883662	756	1.16887e-05	1.17224e-05
	14.28	1	859	0	859	0	859	0	0	15.94	1	756.996	0.00442417	756.991	0.00884834	757	1.16887e-05	1.17226e-05
	14.24	1	860	0	860	0	860	0	0	15.92	1	757.996	0.00443003	757.991	0.00886007	758	1.16887e-05	1.17227e-05
	14.22	1	862	0	862	0	862	0	0	15.91	1	758.996	0.00443589	758.991	0.00887179	759	1.16888e-05	1.17228e-05
	14.21	1	863	0	863	0	863	0	0	15.83	1	759.996	0.00444176	759.991	0.00888351	760	1.16888e-05	1.1723e-05
	14.2	1	864	0	864	0	864	0	0	15.81	1	760.996	0.00444762	760.991	0.00889523	761	1.16889e-05	1.17231e-05
	14.19	1	865	0	865	0	865	0	0	15.8	1	761.996	0.00445348	761.991	0.00890696	762	1.16889e-05	1.17232e-05
	14.16	1	866	0	866	0	866	0	0	15.79	1	762.996	0.00445934	762.991	0.00891868	763	1.1689e-05	1.17234e-05
	14.15	1	868	0	868	0	868	0	0	15.77	1	763.996	0.0044652	763.991	0.0089304	764	1.1689e-05	1.17235e-05
	14.13	1	869	0	869	0	869	0	0	15.67	1	764.996	0.00447106	764.991	0.00894213	765	1.16891e-05	1.17237e-05
	14.08	1	870	0	870	0	870	0	0	15.67	1	765.996	0.00447693	765.991	0.00895385	766	1.16891e-05	1.17237e-05
	14.07	1	873	0	873	0	873	0	0	15.64	1	766.996	0.00448279	766.991	0.00896558	767	1.16891e-05	1.17239e-05
	14.05	1	874	0	874	0	874	0	0	15.62	1	767.996	0.00448865	767.991	0.0089773	768	1.16892e-05	1.17241e-05
	14.03	1	875	0	875	0	875	0	0	15.61	1	768.996	0.00449451	768.991	0.00898902	769	1.16892e-05	1.17242e-05
	14.02	1	878	0	878	0	878	0	0	15.54	1	769.995	0.00450037	769.991	0.00900075	770	1.16893e-05	1.17243e-05
	14.01	1	879	0	879	0	879	0	0	15.53	1	770.995	0.00450624	770.991	0.00901247	771	1.16893e-05	1.17245e-05
	14	1	880	0	880	0	880	0	0	15.5	1	771.995	0.0045121	771.991	0.0090242	772	1.16894e-05	1.17247e-05
	13.99	1	882	0	882	0	882	0	0	15.5	1	772.995	0.00451796	772.991	0.00903592	773	1.16894e-05	1.17247e-05
	13.98	1	883	0	883	0	883	0	0	15.49	1	773.995	0.00452382	773.991	0.00904765	774	1.16895e-05	1.17249e-05
	13.96	1	884	0	884	0	884	0	0	15.48	1	774.995	0.00452969	774.991	0.00905937	775	1.16895e-05	1.17252e-05
	13.94	1	886	0	886	0	886	0	0	15.48	1	775.995	0.00453555	775.991	0.0090711	776	1.16896e-05	1.17252e-05
	13.93	1	887	0	887	0	887	0	0	15.48	1	776.995	0.00454141	776.991	0.00908282	777	1.16896e-05	1.17252e-05
	13.91	1	888	0	888	0	888	0	0	15.47	1	777.995	0.00454727	777.991	0.00909455	778	1.16897e-05	1.17255e-05
	13.89	1	890	0	890	0	890	0	0	15.44	1	778.995	0.00455314	778.991	0.00910627	779	1.16897e-05	1.17256e-05
	13.87	1	891	0	891	0	891	0	0	15.39	1	779.995	0.004559	779.991	0.009118	780	1.16897e-05	1.17259e-05
	13.86	1	893	0	893	0	893	0	0	15.39	1	780.995	0.00456486	780.991	0.00912973	781	1.16898e-05	1.17259e-05
	13.84	1	894	0	894	0	894	0	0	15.39	1	781.995	0.00457073	781.991	0.00914145	782	1.16898e-05	1.17259e-05
	13.82	1	895	0	895	0	895	0	0	15.36	1	782.995	0.00457659	782.991	0.00915318	783	1.16899e-05	1.17262e-05
	13.81	1	897	0	897	0	897	0	0	15.34	1	783.995	0.00458245	783.991	0.0091649	784	1.16899e-05	1.17263e-05
	13.8	1	898	0	898	0	898	0	0	15.31	1	784.995	0.00458832	784.991	0.00917663	785	1.169e-05	1.17265e-05
	13.79	1	899	0	899	0	899	0	0	15.29	1	785.995	0.00459418	785.991	0.00918836	786	1.169e-05	1.17266e-05
	13.78	1	901	0	901	0	901	0	0	15.28	1	786.995	0.00460004	786.991	0.00920008	787	1.16901e-05	1.17267e-05
	13.77	1	902	0	902	0	902	0	0	15.26	1	787.995	0.00460591	787.991	0.00921181	788	1.16901e-05	1.1727e-05
	13.76	1	903	0	903	0	903	0	0	15.26	1	788.995	0.00461177	788.991	0.00922354	789	1.16902e-05	1.1727e-05
	13.75	1	904	0	904	0	904	0	0	15.2	1	789.995	0.00461763	789.991	0.00923526	790	1.16902e-05	1.17272e-05
	13.74	1	905	0	905	0	905	0	0	15.19	1	790.995	0.0046235	790.991	0.00924699	791	1.16903e-05	1.17274e-05
	13.72	1	906	0	906	0	906	0	0	15.19	1	791.995	0.00462936	791.991	0.00925872	792	1.16903e-05	1.17274e-05
	13.7	1	907	0	907	0	907	0	0	15.18	1	792.995	0.00463522	792.991	0.00927045	793	1.16903e-05	1.17277e-05
	13.67	1	909	0	909	0	909	0	0	15.18	1	793.995	0.00464109	793.991	0.00928217	794	1.16904e-05	1.17277e-05
	13.64	1	910	0	910	0	910	0	0	15.16	1	794.995	0.00464695	794.991	0.0092939	795	1.16904e-05	1.17279e-05
	13.62	1	911	0	911	0	911	0	0	15.15	1	795.995	0.00465282	795.991	0.00930563	796	1.16905e-05	1.17281e-05
	13.61	1	913	0	913	0	913	0	0	15.14	1	796.995	0.00465868	796.991	0.00931736	797	1.16905e-05	1.17282e-05
	13.6	1	914	0	914	0	914	0	0	15.13	1	797.995	0.00466454	797.991	0.00932909	798	1.16906e-05	1.17284e-05
	13.58	1	915	0	915	0	915	0	0	15.12	1	798.995	0.00467041	798.991	0.00934082	799	1.16906e-05	1.17285e-05
	13.57	1	916	0	916	0	916	0	0	15.11	1	799.995	0.00467627	799.991	0.00935254	800	1.16907e-05	1.17287e-05
	13.56	1	917	0	917	0	917	0	0	15.08	1	800.995	0.00468214	800.991	0.00936427	801	1.16907e-05	1.17288e-05
	13.54	1	918	0	918	0	918	0	0	15.07	1	801.995	0.004688	801.991	0.009376	802	1.16908e-05	1.1729e-05
	13.52	1	919	0	919	0	919	0	0	15.03	1	802.995	0.00469387	802.991	0.00938773	803	1.16908e-05	1.17291e-05
	13.5	1	920	0	920	0	920	0	0	15.02	1	803.995	0.00469973	803.991	0.00939946	804	1.16909e-05	1.17293e-05
	13.49	1	921	0	921	0	921	0	0	15.02	1	804.995	0.0047056	804.991	0.00941119	805	1.16909e-05	1.17293e-05
	13.48	1	923	0	923	0	923	0	0	14.99	1	805.995	0.00471146	805.991	0.00942292	806	1.1691e-05	1.17296e-05
	13.47	1	924	0	924	0	924	0	0	14.98	1	806.995	0.00471732	806.991	0.00943465	807	1.1691e-05	1.17298e-05
	13.46	1	925	0	925	0	925	0	0	14.98	1	807.995	0.00472319	807.991	0.00944638	808	1.16911e-05	1.17298e-05
	13.44	1	927	0	927	0	927	0	0	14.96	1	808.995	0.00472905	808.991	0.00945811	809	1.16911e-05	1.173e-05
	13.43	1	929	0	929	0	929	0	0	14.94	1	809.995	0.00473492	809.991	0.00946984	810	1.16912e-05	1.17302e-05
	13.39	1	931	0	931	0	931	0	0	14.93	1	810.995	0.00474078	810.991	0.00948157	811	1.16912e-05	1.17303e-05
	13.37	1	932	0	932	0	932	0	0	14.9	1	811.995	0.00474665	811.991	0.0094933	812	1.16913e-05	1.17306e-05
	13.36	1	933	0	933	0	933	0	0	14.9	1	812.995	0.00475252	812.99	0.00950503	813	1.16913e-05	1.17306e-05
	13.33	1	934	0	934	0	934	0	0	14.9	1	813.995	0.00475838	813.99	0.00951676	814	1.16914e-05	1.17306e-05
	13.32	1	936	0	936	0	936	0	0	14.87	1	814.995	0.00476425	814.99	0.00952849	815	1.16914e-05	1.1731e-05
	13.3	1	937	0	937	0	937	0	0	14.87	1	815.995	0.00477011	815.99	0.00954022	816	1.16915e-05	1.1731e-05
	13.28	1	938	0	938	0	938	0	0	14.85	1	816.995	0.00477598	816.99	0.00955196	817	1.16915e-05	1.17313e-05
	13.24	1	939	0	939	0	939	0	0	14.84	1	817.995	0.00478184	817.99	0.00956369	818	1.16915e-05	1.17315e-05
	13.23	1	940	0	940	0	940	0	0	14.84	1	818.995	0.00478771	818.99	0.00957542	819	1.16916e-05	1.17315e-05
	13.21	1	942	0	942	0	942	0	0	14.8	1	819.995	0.00479357	819.99	0.00958715	820	1.16916e-05	1.17318e-05
	13.2	1	943	0	943	0	943	0	0	14.8	1	820.995	0.00479944	820.99	0.00959888	821	1.16917e-05	1.17318e-05
	13.18	1	944	0	944	0	944	0	0	14.79	1	821.995	0.00480531	821.99	0.00961061	822	1.16917e-05	1.17321e-05
	13.17	1	945	0	945	0	945	0	0	14.77	1	822.995	0.00481117	822.99	0.00962235	823	1.16918e-05	1.17322e-05
	13.15	1	946	0	946	0	946	0	0	14.74	1	823.995	0.00481704	823.99	0.00963408	824	1.16918e-05	1.17325e-05
	13.13	1	947	0	947	0	947	0	0	14.74	1	824.995	0.00482291	824.99	0.00964581	825	1.16919e-05	1.17325e-05
	13.12	1	948	0	948	0	948	0	0	14.74	1	825.995	0.00482877	825.99	0.00965754	826	1.16919e-05	1.17325e-05
	13.1	1	951	0	951	0	951	0	0	14.73	1	826.995	0.00483464	826.99	0.00966928	827	1.1692e-05	1.17329e-05
	13.09	1	952	0	952	0	952	0	0	14.7	1	827.995	0.0048405	827.99	0.00968101	828	1.1692e-05	1.1733e-05
	13.08	1	953	0	953	0	953	0	0	14.69	1	828.995	0.00484637	828.99	0.00969274	829	1.16921e-05	1.17333e-05
	13.04	1	954	0	954	0	954	0	0	14.69	1	829.995	0.00485224	829.99	0.00970448	830	1.16921e-05	1.17333e-05
	13.03	1	955	0	955	0	955	0	0	14.67	1	830.995	0.0048581	830.99	0.00971621	831	1.16922e-05	1.17335e-05
	12.97	1	956	0	956	0	956	0	0	14.62	1	831.995	0.00486397	831.99	0.00972794	832	1.16922e-05	1.17337e-05
	12.94	1	957	0	957	0	957	0	0	14.61	1	832.995	0.00486984	832.99	0.00973968	833	1.16923e-05	1.17339e-05
	12.92	1	958	0	958	0	958	0	0	14.6	1	833.995	0.00487571	833.99	0.00975141	834	1.16923e-05	1.1734e-05
	12.91	1	959	0	959	0	959	0	0	14.59	1	834.995	0.00488157	834.99	0.00976315	835	1.16924e-05	1.17342e-05
	12.9	1	960	0	960	0	960	0	0	14.58	1	835.995	0.00488744	835.99	0.00977488	836	1.16924e-05	1.17344e-05
	12.89	1	961	0	961	0	961	0	0	14.58	1	836.995	0.00489331	836.99	0.00978661	837	1.16925e-05	1.17344e-05
	12.87	1	962	0	962	0	962	0	0	14.57	1	837.995	0.00489917	837.99	0.00979835	838	1.16925e-05	1.17347e-05
	12.86	1	963	0	963	0	963	0	0	14.56	1	838.995	0.00490504	838.99	0.00981008	839	1.16926e-05	1.17349e-05
	12.85	1	964	0	964	0	964	0	0	14.53	1	839.995	0.00491091	839.99	0.00982182	840	1.16926e-05	1.17351e-05
	12.83	1	965	0	965	0	965	0	0	14.53	1	840.995	0.00491678	840.99	0.00983355	841	1.16927e-05	1.17351e-05
	12.81	1	969	0	969	0	969	0	0	14.51	1	841.995	0.00492264	841.99	0.00984529	842	1.16927e-05	1.17354e-05
	12.8	1	970	0	970	0	970	0	0	14.5	1	842.995	0.00492851	842.99	0.00985703	843	1.16928e-05	1.17356e-05
	12.79	1	971	0	971	0	971	0	0	14.5	1	843.995	0.00493438	843.99	0.00986876	844	1.16928e-05	1.17356e-05
	12.78	1	972	0	972	0	972	0	0	14.48	1	844.995	0.00494025	844.99	0.0098805	845	1.16929e-05	1.17359e-05
	12.77	1	973	0	973	0	973	0	0	14.44	1	845.995	0.00494612	845.99	0.00989223	846	1.16929e-05	1.17362e-05
	12.74	1	974	0	974	0	974	0	0	14.44	1	846.995	0.00495198	846.99	0.00990397	847	1.1693e-05	1.17362e-05
	12.73	1	977	0	977	0	977	0	0	14.44	1	847.995	0.00495785	847.99	0.00991571	848	1.1693e-05	1.17362e-05
	12.71	1	978	0	978	0	978	0	0	14.42	1	848.995	0.00496372	848.99	0.00992744	849	1.16931e-05	1.17366e-05
	12.69	1	979	0	979	0	979	0	0	14.39	1	849.995	0.00496959	849.99	0.00993918	850	1.16932e-05	1.17367e-05
	12.68	1	980	0	980	0	980	0	0	14.37	1	850.995	0.00497546	850.99	0.00995092	851	1.16932e-05	1.17369e-05
	12.67	1	981	0	981	0	981	0	0	14.36	1	851.995	0.00498133	851.99	0.00996265	852	1.16933e-05	1.17371e-05
	12.66	1	984	0	984	0	984	0	0	14.34	1	852.995	0.00498719	852.99	0.00997439	853	1.16933e-05	1.17374e-05
	12.65	1	985	0	985	0	985	0	0	14.34	1	853.995	0.00499306	853.99	0.00998613	854	1.16934e-05	1.17374e-05
	12.61	1	986	0	986	0	986	0	0	14.31	1	854.995	0.00499893	854.99	0.00999786	855	1.16934e-05	1.17376e-05
	12.58	1	987	0	987	0	987	0	0	14.29	1	855.995	0.0050048	855.99	0.0100096	856	1.16935e-05	1.17379e-05
	12.55	1	988	0	988	0	988	0	0	14.29	1	856.995	0.00501067	856.99	0.0100213	857	1.16935e-05	1.17379e-05
	12.54	1	989	0	989	0	989	0	0	14.28	1	857.995	0.00501654	857.99	0.0100331	858	1.16936e-05	1.17382e-05
	12.53	1	990	0	990	0	990	0	0	14.28	1	858.995	0.00502241	858.99	0.0100448	859	1.16936e-05	1.17382e-05
	12.52	1	991	0	991	0	991	0	0	14.24	1	859.995	0.00502828	859.99	0.0100566	860	1.16937e-05	1.17385e-05
	12.51	1	994	0	994	0	994	0	0	14.22	1	860.995	0.00503415	860.99	0.0100683	861	1.16937e-05	1.17388e-05
	12.48	1	996	0	996	0	996	0	0	14.22	1	861.995	0.00504002	861.99	0.01008	862	1.16938e-05	1.17388e-05
	12.47	1	997	0	997	0	997	0	0	14.21	1	862.995	0.00504589	862.99	0.0100918	863	1.16938e-05	1.17391e-05
	12.44	1	999	0	999	0	999	0	0	14.2	1	863.995	0.00505176	863.99	0.0101035	864	1.16939e-05	1.17392e-05
	12.42	1	1001	0	1001	0	1001	0	0	14.19	1	864.995	0.00505763	864.99	0.0101153	865	1.16939e-05	1.17394e-05
	12.41	1	1002	0	1002	0	1002	0	0	14.16	1	865.995	0.0050635	865.99	0.010127	866	1.1694e-05	1.17396e-05
	12.35	1	1003	0	1003	0	1003	0	0	14.15	1	866.995	0.00506937	866.99	0.0101387	867	1.1694e-05	1.17399e-05
	12.33	1	1004	0	1004	0	1004	0	0	14.15	1	867.995	0.00507524	867.99	0.0101505	868	1.16941e-05	1.17399e-05
	12.28	1	1005	0	1005	0	1005	0	0	14.13	1	868.995	0.00508111	868.99	0.0101622	869	1.16941e-05	1.17402e-05
	12.24	1	1006	0	1006	0	1006	0	0	14.08	1	869.995	0.00508698	869.99	0.010174	870	1.16942e-05	1.17403e-05
	12.23	1	1007	0	1007	0	1007	0	0	14.07	1	870.995	0.00509285	870.99	0.0101857	871	1.16942e-05	1.17407e-05
	12.2	1	1008	0	1008	0	1008	0	0	14.07	1	871.995	0.00509872	871.99	0.0101974	872	1.16943e-05	1.17407e-05
	12.19	1	1012	0	1012	0	1012	0	0	14.07	1	872.995	0.00510459	872.99	0.0102092	873	1.16944e-05	1.17407e-05
	12.18	1	1013	0	1013	0	1013	0	0	14.05	1	873.995	0.00511046	873.99	0.0102209	874	1.16944e-05	1.17411e-05
	12.11	1	1014	0	1014	0	1014	0	0	14.03	1	874.995	0.00511633	874.99	0.0102327	875	1.16945e-05	1.17413e-05
	12.1	1	1018	0	1018	0	1018	0	0	14.02	1	875.995	0.0051222	875.99	0.0102444	876	1.16945e-05	1.17416e-05
	12.09	1	1021	0	1021	0	1021	0	0	14.02	1	876.995	0.00512807	876.99	0.0102561	877	1.16946e-05	1.17416e-05
	12.08	1	1022	0	1022	0	1022	0	0	14.02	1	877.995	0.00513394	877.99	0.0102679	878	1.16946e-05	1.17416e-05
	12.06	1	1024	0	1024	0	1024	0	0	14.01	1	878.995	0.00513981	878.99	0.0102796	879	1.16947e-05	1.1742e-05
	12.05	1	1025	0	1025	0	1025	0	0	14	1	879.995	0.00514568	879.99	0.0102914	880	1.16947e-05	1.17422e-05
	12.03	1	1026	0	1026	0	1026	0	0	13.99	1	880.995	0.00515155	880.99	0.0103031	881	1.16948e-05	1.17425e-05
	12.02	1	1027	0	1027	0	1027	0	0	13.99	1	881.995	0.00515742	881.99	0.0103148	882	1.16948e-05	1.17425e-05
	12.01	1	1028	0	1028	0	1028	0	0	13.98	1	882.995	0.0051633	882.99	0.0103266	883	1.16949e-05	1.17428e-05
	12	1	1033	0	1033	0	1033	0	0	13.96	1	883.995	0.00516917	883.99	0.0103383	884	1.16949e-05	1.1743e-05
	11.99	1	1035	0	1035	0	1035	0	0	13.94	1	884.995	0.00517504	884.99	0.0103501	885	1.1695e-05	1.17433e-05
	11.96	1	1037	0	1037	0	1037	0	0	13.94	1	885.995	0.00518091	885.99	0.0103618	886	1.16951e-05	1.17433e-05
	11.95	1	1040	0	1040	0	1040	0	0	13.93	1	886.995	0.00518678	886.99	0.0103736	887	1.16951e-05	1.17436e-05
	11.9	1	1041	0	1041	0	1041	0	0	13.91	1	887.995	0.00519265	887.99	0.0103853	888	1.16952e-05	1.17438e-05
	11.88	1	1044	0	1044	0	1044	0	0	13.89	1	888.995	0.00519853	888.99	0.0103971	889	1.16952e-05	1.17441e-05
	11.85	1	1045	0	1045	0	1045	0	0	13.89	1	889.995	0.0052044	889.99	0.0104088	890	1.16953e-05	1.17441e-05
	11.79	1	1048	0	1048	0	1048	0	0	13.87	1	890.995	0.00521027	890.99	0.0104205	891	1.16953e-05	1.17444e-05
	11.77	1	1050	0	1050	0	1050	0	0	13.86	1	891.995	0.00521614	891.99	0.0104323	892	1.16954e-05	1.17447e-05
	11.76	1	1051	0	1051	0	1051	0	0	13.86	1	892.995	0.00522202	892.99	0.010444	893	1.16954e-05	1.17447e-05
	11.75	1	1052	0	1052	0	1052	0	0	13.84	1	893.995	0.00522789	893.99	0.0104558	894	1.16955e-05	1.1745e-05
	11.74	1	1054	0	1054	0	1054	0	0	13.82	1	894.995	0.00523376	894.99	0.0104675	895	1.16956e-05	1.17452e-05
	11.73	1	1056	0	1056	0	1056	0	0	13.81	1	895.995	0.00523963	895.99	0.0104793	896	1.16956e-05	1.17455e-05
	11.71	1	1057	0	1057	0	1057	0	0	13.81	1	896.995	0.00524551	896.99	0.010491	897	1.16957e-05	1.17455e-05
	11.66	1	1061	0	1061	0	1061	0	0	13.8	1	897.995	0.00525138	897.989	0.0105028	898	1.16957e-05	1.17458e-05
	11.64	1	1062	0	1062	0	1062	0	0	13.79	1	898.995	0.00525725	898.989	0.0105145	899	1.16958e-05	1.1746e-05
	11.63	1	1063	0	1063	0	1063	0	0	13.78	1	899.995	0.00526313	899.989	0.0105263	900	1.16958e-05	1.17463e-05
	11.62	1	1065	0	1065	0	1065	0	0	13.78	1	900.995	0.005269	900.989	0.010538	901	1.16959e-05	1.17463e-05
	11.59	1	1066	0	1066	0	1066	0	0	13.77	1	901.995	0.00527487	901.989	0.0105497	902	1.16959e-05	1.17466e-05
	11.58	1	1067	0	1067	0	1067	0	0	13.76	1	902.995	0.00528074	902.989	0.0105615	903	1.1696e-05	1.17468e-05
	11.57	1	1069	0	1069	0	1069	0	0	13.75	1	903.995	0.00528662	903.989	0.0105732	904	1.16961e-05	1.1747e-05
	11.56	1	1070	0	1070	0	1070	0	0	13.74	1	904.995	0.00529249	904.989	0.010585	905	1.16961e-05	1.17472e-05
	11.55	1	1071	0	1071	0	1071	0	0	13.72	1	905.995	0.00529837	905.989	0.0105967	906	1.16962e-05	1.17474e-05
	11.54	1	1072	0	1072	0	1072	0	0	13.7	1	906.995	0.00530424	906.989	0.0106085	907	1.16962e-05	1.17476e-05
	11.53	1	1073	0	1073	0	1073	0	0	13.67	1	907.995	0.00531011	907.989	0.0106202	908	1.16963e-05	1.17479e-05
	11.5	1	1074	0	1074	0	1074	0	0	13.67	1	908.995	0.00531599	908.989	0.010632	909	1.16963e-05	1.17479e-05
	11.49	1	1075	0	1075	0	1075	0	0	13.64	1	909.995	0.00532186	909.989	0.0106437	910	1.16964e-05	1.17483e-05
	11.48	1	1077	0	1077	0	1077	0	0	13.62	1	910.995	0.00532774	910.989	0.0106555	911	1.16965e-05	1.17485e-05
	11.46	1	1079	0	1079	0	1079	0	0	13.61	1	911.995	0.00533361	911.989	0.0106672	912	1.16965e-05	1.17488e-05
	11.45	1	1080	0	1080	0	1080	0	0	13.61	1	912.995	0.00533948	912.989	0.010679	913	1.16966e-05	1.17488e-05
	11.44	1	1081	0	1081	0	1081	0	0	13.6	1	913.995	0.00534536	913.989	0.0106907	914	1.16966e-05	1.17491e-05
	11.43	1	1084	0	1084	0	1084	0	0	13.58	1	914.995	0.00535123	914.989	0.0107025	915	1.16967e-05	1.17493e-05
	11.41	1	1085	0	1085	0	1085	0	0	13.57	1	915.995	0.00535711	915.989	0.0107142	916	1.16967e-05	1.17495e-05
	11.4	1	1086	0	1086	0	1086	0	0	13.56	1	916.995	0.00536298	916.989	0.010726	917	1.16968e-05	1.17498e-05
	11.39	1	1088	0	1088	0	1088	0	0	13.54	1	917.995	0.00536886	917.989	0.0107377	918	1.16969e-05	1.175e-05
	11.37	1	1089	0	1089	0	1089	0	0	13.52	1	918.995	0.00537473	918.989	0.0107495	919	1.16969e-05	1.17502e-05
	11.36	1	1090	0	1090	0	1090	0	0	13.5	1	919.995	0.00538061	919.989	0.0107612	920	1.1697e-05	1.17504e-05
	11.35	1	1092	0	1092	0	1092	0	0	13.49	1	920.995	0.00538648	920.989	0.010773	921	1.1697e-05	1.17506e-05
	11.34	1	1093	0	1093	0	1093	0	0	13.48	1	921.995	0.00539236	921.989	0.0107847	922	1.16971e-05	1.1751e-05
	11.31	1	1094	0	1094	0	1094	0	0	13.48	1	922.995	0.00539824	922.989	0.0107965	923	1.16972e-05	1.1751e-05
	11.29	1	1096	0	1096	0	1096	0	0	13.47	1	923.995	0.00540411	923.989	0.0108082	924	1.16972e-05	1.17513e-05
	11.28	1	1097	0	1097	0	1097	0	0	13.46	1	924.995	0.00540999	924.989	0.01082	925	1.16973e-05	1.17515e-05
	11.25	1	1100	0	1100	0	1100	0	0	13.44	1	925.995	0.00541586	925.989	0.0108317	926	1.16973e-05	1.17519e-05
	11.24	1	1101	0	1101	0	1101	0	0	13.44	1	926.995	0.00542174	926.989	0.0108435	927	1.16974e-05	1.17519e-05
	11.21	1	1103	0	1103	0	1103	0	0	13.43	1	927.995	0.00542761	927.989	0.0108552	928	1.16974e-05	1.17523e-05
	11.2	1	1104	0	1104	0	1104	0	0	13.43	1	928.995	0.00543349	928.989	0.010867	929	1.16975e-05	1.17523e-05
	11.18	1	1105	0	1105	0	1105	0	0	13.39	1	929.995	0.00543937	929.989	0.0108787	930	1.16976e-05	1.17528e-05
	11.16	1	1108	0	1108	0	1108	0	0	13.39	1	930.995	0.00544524	930.989	0.0108905	931	1.16976e-05	1.17528e-05
	11.15	1	1109	0	1109	0	1109	0	0	13.37	1	931.995	0.00545112	931.989	0.0109022	932	1.16977e-05	1.17531e-05
	11.13	1	1110	0	1110	0	1110	0	0	13.36	1	932.995	0.005457	932.989	0.010914	933	1.16977e-05	1.17533e-05
	11.11	1	1111	0	1111	0	1111	0	0	13.33	1	933.995	0.00546287	933.989	0.0109257	934	1.16978e-05	1.17536e-05
	11.1	1	1113	0	1113	0	1113	0	0	13.32	1	934.995	0.00546875	934.989	0.0109375	935	1.16979e-05	1.17539e-05
	11.08	1	1114	0	1114	0	1114	0	0	13.32	1	935.995	0.00547463	935.989	0.0109493	936	1.16979e-05	1.17539e-05
	11.07	1	1116	0	1116	0	1116	0	0	13.3	1	936.995	0.0054805	936.989	0.010961	937	1.1698e-05	1.17543e-05
	11.06	1	1118	0	1118	0	1118	0	0	13.28	1	937.995	0.00548638	937.989	0.0109728	938	1.1698e-05	1.17545e-05
	11.05	1	1120	0	1120	0	1120	0	0	13.24	1	938.995	0.00549226	938.989	0.0109845	939	1.16981e-05	1.17547e-05
	11	1	1123	0	1123	0	1123	0	0	13.23	1	939.995	0.00549814	939.989	0.0109963	940	1.16982e-05	1.1755e-05
	10.99	1	1125	0	1125	0	1125	0	0	13.21	1	940.994	0.00550401	940.989	0.011008	941	1.16982e-05	1.17553e-05
	10.98	1	1126	0	1126	0	1126	0	0	13.21	1	941.994	0.00550989	941.989	0.0110198	942	1.16983e-05	1.17553e-05
	10.94	1	1128	0	1128	0	1128	0	0	13.2	1	942.994	0.00551577	942.989	0.0110315	943	1.16983e-05	1.17557e-05
	10.92	1	1129	0	1129	0	1129	0	0	13.18	1	943.994	0.00552165	943.989	0.0110433	944	1.16984e-05	1.17559e-05
	10.91	1	1130	0	1130	0	1130	0	0	13.17	1	944.994	0.00552753	944.989	0.0110551	945	1.16985e-05	1.17561e-05
	10.89	1	1132	0	1132	0	1132	0	0	13.15	1	945.994	0.0055334	945.989	0.0110668	946	1.16985e-05	1.17564e-05
	10.88	1	1133	0	1133	0	1133	0	0	13.13	1	946.994	0.00553928	946.989	0.0110786	947	1.16986e-05	1.17566e-05
	10.86	1	1134	0	1134	0	1134	0	0	13.12	1	947.994	0.00554516	947.989	0.0110903	948	1.16987e-05	1.17569e-05
	10.85	1	1135	0	1135	0	1135	0	0	13.1	1	948.994	0.00555104	948.989	0.0111021	949	1.16987e-05	1.17574e-05
	10.84	1	1136	0	1136	0	1136	0	0	13.1	1	949.994	0.00555692	949.989	0.0111138	950	1.16988e-05	1.17574e-05
	10.83	1	1138	0	1138	0	1138	0	0	13.1	1	950.994	0.0055628	950.989	0.0111256	951	1.16988e-05	1.17574e-05
	10.82	1	1139	0	1139	0	1139	0	0	13.09	1	951.994	0.00556868	951.989	0.0111374	952	1.16989e-05	1.17578e-05
	10.81	1	1142	0	1142	0	1142	0	0	13.08	1	952.994	0.00557455	952.989	0.0111491	953	1.1699e-05	1.17581e-05
	10.77	1	1143	0	1143	0	1143	0	0	13.04	1	953.994	0.00558043	953.989	0.0111609	954	1.1699e-05	1.17583e-05
	10.76	1	1144	0	1144	0	1144	0	0	13.03	1	954.994	0.00558631	954.989	0.0111726	955	1.16991e-05	1.17586e-05
	10.75	1	1145	0	1145	0	1145	0	0	12.97	1	955.994	0.00559219	955.989	0.0111844	956	1.16991e-05	1.17588e-05
	10.74	1	1147	0	1147	0	1147	0	0	12.94	1	956.994	0.00559807	956.989	0.0111961	957	1.16992e-05	1.17591e-05
	10.73	1	1148	0	1148	0	1148	0	0	12.92	1	957.994	0.00560395	957.989	0.0112079	958	1.16993e-05	1.17593e-05
	10.72	1	1149	0	1149	0	1149	0	0	12.91	1	958.994	0.00560983	958.989	0.0112197	959	1.16993e-05	1.17596e-05
	10.7	1	1150	0	1150	0	1150	0	0	12.9	1	959.994	0.00561571	959.989	0.0112314	960	1.16994e-05	1.17598e-05
	10.68	1	1151	0	1151	0	1151	0	0	12.89	1	960.994	0.00562159	960.989	0.0112432	961	1.16995e-05	1.17601e-05
	10.67	1	1152	0	1152	0	1152	0	0	12.87	1	961.994	0.00562747	961.989	0.0112549	962	1.16995e-05	1.17603e-05
	10.66	1	1153	0	1153	0	1153	0	0	12.86	1	962.994	0.00563335	962.989	0.0112667	963	1.16996e-05	1.17606e-05
	10.65	1	1154	0	1154	0	1154	0	0	12.85	1	963.994	0.00563923	963.989	0.0112785	964	1.16997e-05	1.17609e-05
	10.64	1	1155	0	1155	0	1155	0	0	12.83	1	964.994	0.00564511	964.989	0.0112902	965	1.16997e-05	1.17611e-05
	10.62	1	1156	0	1156	0	1156	0	0	12.81	1	965.994	0.00565099	965.989	0.011302	966	1.16998e-05	1.17618e-05
	10.61	1	1157	0	1157	0	1157	0	0	12.81	1	966.994	0.00565687	966.989	0.0113137	967	1.16998e-05	1.17618e-05
	10.59	1	1160	0	1160	0	1160	0	0	12.81	1	967.994	0.00566276	967.989	0.0113255	968	1.16999e-05	1.17618e-05
	10.56	1	1161	0	1161	0	1161	0	0	12.81	1	968.994	0.00566864	968.989	0.0113373	969	1.17e-05	1.17618e-05
	10.55	1	1162	0	1162	0	1162	0	0	12.8	1	969.994	0.00567452	969.989	0.011349	970	1.17e-05	1.17624e-05
	10.53	1	1163	0	1163	0	1163	0	0	12.79	1	970.994	0.0056804	970.989	0.0113608	971	1.17001e-05	1.17627e-05
	10.52	1	1164	0	1164	0	1164	0	0	12.78	1	971.994	0.00568628	971.989	0.0113726	972	1.17002e-05	1.17629e-05
	10.5	1	1166	0	1166	0	1166	0	0	12.77	1	972.994	0.00569216	972.989	0.0113843	973	1.17002e-05	1.17632e-05
	10.49	1	1168	0	1168	0	1168	0	0	12.74	1	973.994	0.00569804	973.989	0.0113961	974	1.17003e-05	1.17635e-05
	10.48	1	1169	0	1169	0	1169	0	0	12.73	1	974.994	0.00570393	974.989	0.0114079	975	1.17004e-05	1.1764e-05
	10.47	1	1170	0	1170	0	1170	0	0	12.73	1	975.994	0.00570981	975.989	0.0114196	976	1.17004e-05	1.1764e-05
	10.46	1	1171	0	1171	0	1171	0	0	12.73	1	976.994	0.00571569	976.989	0.0114314	977	1.17005e-05	1.1764e-05
	10.45	1	1173	0	1173	0	1173	0	0	12.71	1	977.994	0.00572157	977.989	0.0114431	978	1.17006e-05	1.17645e-05
	10.42	1	1174	0	1174	0	1174	0	0	12.69	1	978.994	0.00572745	978.989	0.0114549	979	1.17006e-05	1.17648e-05
	10.41	1	1175	0	1175	0	1175	0	0	12.68	1	979.994	0.00573334	979.989	0.0114667	980	1.17007e-05	1.17651e-05
	10.4	1	1176	0	1176	0	1176	0	0	12.67	1	980.994	0.00573922	980.989	0.0114784	981	1.17008e-05	1.17654e-05
	10.39	1	1177	0	1177	0	1177	0	0	12.66	1	981.994	0.0057451	981.989	0.0114902	982	1.17008e-05	1.17659e-05
	10.38	1	1178	0	1178	0	1178	0	0	12.66	1	982.994	0.00575099	982.988	0.011502	983	1.17009e-05	1.17659e-05
	10.36	1	1181	0	1181	0	1181	0	0	12.66	1	983.994	0.00575687	983.988	0.0115137	984	1.1701e-05	1.17659e-05
	10.35	1	1183	0	1183	0	1183	0	0	12.65	1	984.994	0.00576275	984.988	0.0115255	985	1.1701e-05	1.17665e-05
	10.33	1	1187	0	1187	0	1187	0	0	12.61	1	985.994	0.00576864	985.988	0.0115373	986	1.17011e-05	1.17667e-05
	10.31	1	1188	0	1188	0	1188	0	0	12.58	1	986.994	0.00577452	986.988	0.011549	987	1.17012e-05	1.1767e-05
	10.3	1	1189	0	1189	0	1189	0	0	12.55	1	987.994	0.0057804	987.988	0.0115608	988	1.17012e-05	1.17673e-05
	10.27	1	1190	0	1190	0	1190	0	0	12.54	1	988.994	0.00578629	988.988	0.0115726	989	1.17013e-05	1.17676e-05
	10.26	1	1193	0	1193	0	1193	0	0	12.53	1	989.994	0.00579217	989.988	0.0115843	990	1.17014e-05	1.17679e-05
	10.25	1	1195	0	1195	0	1195	0	0	12.52	1	990.994	0.00579805	990.988	0.0115961	991	1.17014e-05	1.17681e-05
	10.24	1	1197	0	1197	0	1197	0	0	12.51	1	991.994	0.00580394	991.988	0.0116079	992	1.17015e-05	1.17687e-05
	10.23	1	1198	0	1198	0	1198	0	0	12.51	1	992.994	0.00580982	992.988	0.0116196	993	1.17016e-05	1.17687e-05
	10.2	1	1200	0	1200	0	1200	0	0	12.51	1	993.994	0.00581571	993.988	0.0116314	994	1.17016e-05	1.17687e-05
	10.18	1	1202	0	1202	0	1202	0	0	12.48	1	994.994	0.00582159	994.988	0.0116432	995	1.17017e-05	1.17694e-05
	10.17	1	1204	0	1204	0	1204	0	0	12.48	1	995.994	0.00582748	995.988	0.011655	996	1.17018e-05	1.17694e-05
	10.15	1	1205	0	1205	0	1205	0	0	12.47	1	996.994	0.00583336	996.988	0.0116667	997	1.17018e-05	1.17699e-05
	10.13	1	1206	0	1206	0	1206	0	0	12.44	1	997.994	0.00583925	997.988	0.0116785	998	1.17019e-05	1.17703e-05
	10.12	1	1207	0	1207	0	1207	0	0	12.44	1	998.994	0.00584513	998.988	0.0116903	999	1.1702e-05	1.17703e-05
	10.11	1	1210	0	1210	0	1210	0	0	12.42	1	999.994	0.00585102	999.988	0.011702	1000	1.1702e-05	1.17709e-05
	10.1	1	1211	0	1211	0	1211	0	0	12.42	1	1000.99	0.0058569	1000.99	0.0117138	1001	1.17021e-05	1.17709e-05
	10.06	1	1213	0	1213	0	1213	0	0	12.41	1	1001.99	0.00586279	1001.99	0.0117256	1002	1.17022e-05	1.17713e-05
	10.05	1	1214	0	1214	0	1214	0	0	12.35	1	1002.99	0.00586867	1002.99	0.0117373	1003	1.17022e-05	1.17716e-05
	10.04	1	1215	0	1215	0	1215	0	0	12.33	1	1003.99	0.00587456	1003.99	0.0117491	1004	1.17023e-05	1.17719e-05
	10.03	1	1217	0	1217	0	1217	0	0	12.28	1	1004.99	0.00588045	1004.99	0.0117609	1005	1.17024e-05	1.17722e-05
	10.02	1	1219	0	1219	0	1219	0	0	12.24	1	1005.99	0.00588633	1005.99	0.0117727	1006	1.17025e-05	1.17725e-05
	10	1	1223	0	1223	0	1223	0	0	12.23	1	1006.99	0.00589222	1006.99	0.0117844	1007	1.17025e-05	1.17728e-05
	9.97	1	1224	0	1224	0	1224	0	0	12.2	1	1007.99	0.00589811	1007.99	0.0117962	1008	1.17026e-05	1.17731e-05
	9.96	1	1225	0	1225	0	1225	0	0	12.19	1	1008.99	0.00590399	1008.99	0.011808	1009	1.17027e-05	1.17739e-05
	9.95	1	1226	0	1226	0	1226	0	0	12.19	1	1009.99	0.00590988	1009.99	0.0118198	1010	1.17027e-05	1.17739e-05
	9.94	1	1228	0	1228	0	1228	0	0	12.19	1	1010.99	0.00591577	1010.99	0.0118315	1011	1.17028e-05	1.17739e-05
	9.93	1	1229	0	1229	0	1229	0	0	12.19	1	1011.99	0.00592165	1011.99	0.0118433	1012	1.17029e-05	1.17739e-05
	9.92	1	1232	0	1232	0	1232	0	0	12.18	1	1012.99	0.00592754	1012.99	0.0118551	1013	1.17029e-05	1.17747e-05
	9.9	1	1233	0	1233	0	1233	0	0	12.11	1	1013.99	0.00593343	1013.99	0.0118669	1014	1.1703e-05	1.1775e-05
	9.88	1	1234	0	1234	0	1234	0	0	12.1	1	1014.99	0.00593932	1014.99	0.0118786	1015	1.17031e-05	1.17757e-05
	9.87	1	1235	0	1235	0	1235	0	0	12.1	1	1015.99	0.0059452	1015.99	0.0118904	1016	1.17032e-05	1.17757e-05
	9.86	1	1237	0	1237	0	1237	0	0	12.1	1	1016.99	0.00595109	1016.99	0.0119022	1017	1.17032e-05	1.17757e-05
	9.84	1	1239	0	1239	0	1239	0	0	12.1	1	1017.99	0.00595698	1017.99	0.011914	1018	1.17033e-05	1.17757e-05
	9.83	1	1240	0	1240	0	1240	0	0	12.09	1	1018.99	0.00596287	1018.99	0.0119257	1019	1.17034e-05	1.17768e-05
	9.81	1	1242	0	1242	0	1242	0	0	12.09	1	1019.99	0.00596876	1019.99	0.0119375	1020	1.17034e-05	1.17768e-05
	9.8	1	1244	0	1244	0	1244	0	0	12.09	1	1020.99	0.00597464	1020.99	0.0119493	1021	1.17035e-05	1.17768e-05
	9.78	1	1245	0	1245	0	1245	0	0	12.08	1	1021.99	0.00598053	1021.99	0.0119611	1022	1.17036e-05	1.17775e-05
	9.77	1	1246	0	1246	0	1246	0	0	12.06	1	1022.99	0.00598642	1022.99	0.0119728	1023	1.17037e-05	1.1778e-05
	9.76	1	1247	0	1247	0	1247	0	0	12.06	1	1023.99	0.00599231	1023.99	0.0119846	1024	1.17037e-05	1.1778e-05
	9.74	1	1248	0	1248	0	1248	0	0	12.05	1	1024.99	0.0059982	1024.99	0.0119964	1025	1.17038e-05	1.17784e-05
	9.71	1	1249	0	1249	0	1249	0	0	12.03	1	1025.99	0.00600409	1025.99	0.0120082	1026	1.17039e-05	1.17788e-05
	9.69	1	1252	0	1252	0	1252	0	0	12.02	1	1026.99	0.00600998	1026.99	0.01202	1027	1.1704e-05	1.17791e-05
	9.66	1	1253	0	1253	0	1253	0	0	12.01	1	1027.99	0.00601587	1027.99	0.0120317	1028	1.1704e-05	1.17794e-05
	9.65	1	1254	0	1254	0	1254	0	0	12	1	1028.99	0.00602176	1028.99	0.0120435	1029	1.17041e-05	1.17804e-05
	9.64	1	1256	0	1256	0	1256	0	0	12	1	1029.99	0.00602765	1029.99	0.0120553	1030	1.17042e-05	1.17804e-05
	9.63	1	1257	0	1257	0	1257	0	0	12	1	1030.99	0.00603354	1030.99	0.0120671	1031	1.17042e-05	1.17804e-05
	9.61	1	1258	0	1258	0	1258	0	0	12	1	1031.99	0.00603943	1031.99	0.0120789	1032	1.17043e-05	1.17804e-05
	9.59	1	1259	0	1259	0	1259	0	0	12	1	1032.99	0.00604532	1032.99	0.0120906	1033	1.17044e-05	1.17804e-05
	9.56	1	1262	0	1262	0	1262	0	0	11.99	1	1033.99	0.00605121	1033.99	0.0121024	1034	1.17045e-05	1.17816e-05
	9.55	1	1264	0	1264	0	1264	0	0	11.99	1	1034.99	0.0060571	1034.99	0.0121142	1035	1.17045e-05	1.17816e-05
	9.54	1	1265	0	1265	0	1265	0	0	11.96	1	1035.99	0.00606299	1035.99	0.012126	1036	1.17046e-05	1.17822e-05
	9.51	1	1266	0	1266	0	1266	0	0	11.96	1	1036.99	0.00606888	1036.99	0.0121378	1037	1.17047e-05	1.17822e-05
	9.5	1	1267	0	1267	0	1267	0	0	11.95	1	1037.99	0.00607478	1037.99	0.0121496	1038	1.17048e-05	1.17831e-05
	9.49	1	1268	0	1268	0	1268	0	0	11.95	1	1038.99	0.00608067	1038.99	0.0121613	1039	1.17048e-05	1.17831e-05
	9.48	1	1269	0	1269	0	1269	0	0	11.95	1	1039.99	0.00608656	1039.99	0.0121731	1040	1.17049e-05	1.17831e-05
	9.47	1	1271	0	1271	0	1271	0	0	11.9	1	1040.99	0.00609245	1040.99	0.0121849	1041	1.1705e-05	1.17838e-05
	9.45	1	1272	0	1272	0	1272	0	0	11.88	1	1041.99	0.00609834	1041.99	0.0121967	1042	1.17051e-05	1.17845e-05
	9.44	1	1273	0	1273	0	1273	0	0	11.88	1	1042.99	0.00610424	1042.99	0.0122085	1043	1.17051e-05	1.17845e-05
	9.43	1	1275	0	1275	0	1275	0	0	11.88	1	1043.99	0.00611013	1043.99	0.0122203	1044	1.17052e-05	1.17845e-05
	9.42	1	1277	0	1277	0	1277	0	0	11.85	1	1044.99	0.00611602	1044.99	0.012232	1045	1.17053e-05	1.17852e-05
	9.4	1	1279	0	1279	0	1279	0	0	11.79	1	1045.99	0.00612191	1045.99	0.0122438	1046	1.17054e-05	1.17859e-05
	9.39	1	1281	0	1281	0	1281	0	0	11.79	1	1046.99	0.00612781	1046.99	0.0122556	1047	1.17055e-05	1.17859e-05
	9.38	1	1283	0	1283	0	1283	0	0	11.79	1	1047.99	0.0061337	1047.99	0.0122674	1048	1.17055e-05	1.17859e-05
	9.36	1	1284	0	1284	0	1284	0	0	11.77	1	1048.99	0.00613959	1048.99	0.0122792	1049	1.17056e-05	1.17868e-05
	9.35	1	1285	0	1285	0	1285	0	0	11.77	1	1049.99	0.00614549	1049.99	0.012291	1050	1.17057e-05	1.17868e-05
	9.34	1	1287	0	1287	0	1287	0	0	11.76	1	1050.99	0.00615138	1050.99	0.0123028	1051	1.17058e-05	1.17873e-05
	9.33	1	1288	0	1288	0	1288	0	0	11.75	1	1051.99	0.00615727	1051.99	0.0123145	1052	1.17058e-05	1.17877e-05
	9.32	1	1290	0	1290	0	1290	0	0	11.74	1	1052.99	0.00616317	1052.99	0.0123263	1053	1.17059e-05	1.17882e-05
	9.31	1	1294	0	1294	0	1294	0	0	11.74	1	1053.99	0.00616906	1053.99	0.0123381	1054	1.1706e-05	1.17882e-05
	9.3	1	1296	0	1296	0	1296	0	0	11.73	1	1054.99	0.00617496	1054.99	0.0123499	1055	1.17061e-05	1.17889e-05
	9.29	1	1298	0	1298	0	1298	0	0	11.73	1	1055.99	0.00618085	1055.99	0.0123617	1056	1.17062e-05	1.17889e-05
	9.28	1	1300	0	1300	0	1300	0	0	11.71	1	1056.99	0.00618675	1056.99	0.0123735	1057	1.17062e-05	1.17895e-05
	9.27	1	1303	0	1303	0	1303	0	0	11.66	1	1057.99	0.00619264	1057.99	0.0123853	1058	1.17063e-05	1.17904e-05
	9.24	1	1304	0	1304	0	1304	0	0	11.66	1	1058.99	0.00619854	1058.99	0.0123971	1059	1.17064e-05	1.17904e-05
	9.2	1	1306	0	1306	0	1306	0	0	11.66	1	1059.99	0.00620443	1059.99	0.0124089	1060	1.17065e-05	1.17904e-05
	9.19	1	1307	0	1307	0	1307	0	0	11.66	1	1060.99	0.00621033	1060.99	0.0124207	1061	1.17066e-05	1.17904e-05
	9.18	1	1308	0	1308	0	1308	0	0	11.64	1	1061.99	0.00621622	1061.99	0.0124324	1062	1.17066e-05	1.17913e-05
	9.16	1	1311	0	1311	0	1311	0	0	11.63	1	1062.99	0.00622212	1062.99	0.0124442	1063	1.17067e-05	1.17917e-05
	9.13	1	1312	0	1312	0	1312	0	0	11.62	1	1063.99	0.00622801	1063.99	0.012456	1064	1.17068e-05	1.17923e-05
	9.1	1	1314	0	1314	0	1314	0	0	11.62	1	1064.99	0.00623391	1064.99	0.0124678	1065	1.17069e-05	1.17923e-05
	9.09	1	1318	0	1318	0	1318	0	0	11.59	1	1065.99	0.00623981	1065.99	0.0124796	1066	1.1707e-05	1.17928e-05
	9.08	1	1319	0	1319	0	1319	0	0	11.58	1	1066.99	0.0062457	1066.99	0.0124914	1067	1.1707e-05	1.17932e-05
	9.07	1	1322	0	1322	0	1322	0	0	11.57	1	1067.99	0.0062516	1067.99	0.0125032	1068	1.17071e-05	1.17938e-05
	9.06	1	1323	0	1323	0	1323	0	0	11.57	1	1068.99	0.0062575	1068.99	0.012515	1069	1.17072e-05	1.17938e-05
	9.05	1	1324	0	1324	0	1324	0	0	11.56	1	1069.99	0.00626339	1069.99	0.0125268	1070	1.17073e-05	1.17944e-05
	9.04	1	1325	0	1325	0	1325	0	0	11.55	1	1070.99	0.00626929	1070.99	0.0125386	1071	1.17074e-05	1.17948e-05
	9.03	1	1326	0	1326	0	1326	0	0	11.54	1	1071.99	0.00627519	1071.99	0.0125504	1072	1.17074e-05	1.17952e-05
	9.02	1	1327	0	1327	0	1327	0	0	11.53	1	1072.99	0.00628109	1072.99	0.0125622	1073	1.17075e-05	1.17956e-05
	9.01	1	1328	0	1328	0	1328	0	0	11.5	1	1073.99	0.00628698	1073.99	0.012574	1074	1.17076e-05	1.17959e-05
	9	1	1329	0	1329	0	1329	0	0	11.49	1	1074.99	0.00629288	1074.99	0.0125858	1075	1.17077e-05	1.17963e-05
	8.99	1	1330	0	1330	0	1330	0	0	11.48	1	1075.99	0.00629878	1075.99	0.0125976	1076	1.17078e-05	1.17969e-05
	8.97	1	1332	0	1332	0	1332	0	0	11.48	1	1076.99	0.00630468	1076.99	0.0126094	1077	1.17079e-05	1.17969e-05
	8.95	1	1334	0	1334	0	1334	0	0	11.46	1	1077.99	0.00631058	1077.99	0.0126212	1078	1.17079e-05	1.17977e-05
	8.93	1	1336	0	1336	0	1336	0	0	11.46	1	1078.99	0.00631648	1078.99	0.012633	1079	1.1708e-05	1.17977e-05
	8.92	1	1337	0	1337	0	1337	0	0	11.45	1	1079.99	0.00632238	1079.99	0.0126448	1080	1.17081e-05	1.17983e-05
	8.91	1	1339	0	1339	0	1339	0	0	11.44	1	1080.99	0.00632828	1080.99	0.0126566	1081	1.17082e-05	1.17987e-05
	8.9	1	1340	0	1340	0	1340	0	0	11.43	1	1081.99	0.00633418	1081.99	0.0126684	1082	1.17083e-05	1.17996e-05
	8.88	1	1341	0	1341	0	1341	0	0	11.43	1	1082.99	0.00634008	1082.99	0.0126802	1083	1.17084e-05	1.17996e-05
	8.87	1	1342	0	1342	0	1342	0	0	11.43	1	1083.99	0.00634598	1083.99	0.012692	1084	1.17084e-05	1.17996e-05
	8.86	1	1346	0	1346	0	1346	0	0	11.41	1	1084.99	0.00635188	1084.99	0.0127038	1085	1.17085e-05	1.18004e-05
	8.84	1	1349	0	1349	0	1349	0	0	11.4	1	1085.99	0.00635778	1085.99	0.0127156	1086	1.17086e-05	1.18008e-05
	8.82	1	1350	0	1350	0	1350	0	0	11.39	1	1086.99	0.00636368	1086.99	0.0127274	1087	1.17087e-05	1.18014e-05
	8.81	1	1353	0	1353	0	1353	0	0	11.39	1	1087.99	0.00636958	1087.99	0.0127392	1088	1.17088e-05	1.18014e-05
	8.8	1	1355	0	1355	0	1355	0	0	11.37	1	1088.99	0.00637548	1088.99	0.012751	1089	1.17089e-05	1.1802e-05
	8.77	1	1356	0	1356	0	1356	0	0	11.36	1	1089.99	0.00638138	1089.99	0.0127628	1090	1.1709e-05	1.18025e-05
	8.76	1	1360	0	1360	0	1360	0	0	11.35	1	1090.99	0.00638728	1090.99	0.0127746	1091	1.1709e-05	1.18031e-05
	8.75	1	1362	0	1362	0	1362	0	0	11.35	1	1091.99	0.00639318	1091.99	0.0127864	1092	1.17091e-05	1.18031e-05
	8.73	1	1363	0	1363	0	1363	0	0	11.34	1	1092.99	0.00639908	1092.99	0.0127982	1093	1.17092e-05	1.18037e-05
	8.72	1	1364	0	1364	0	1364	0	0	11.31	1	1093.99	0.00640499	1093.99	0.01281	1094	1.17093e-05	1.18042e-05
	8.71	1	1365	0	1365	0	1365	0	0	11.29	1	1094.99	0.00641089	1094.99	0.0128218	1095	1.17094e-05	1.18048e-05
	8.7	1	1367	0	1367	0	1367	0	0	11.29	1	1095.99	0.00641679	1095.99	0.0128336	1096	1.17095e-05	1.18048e-05
	8.69	1	1369	0	1369	0	1369	0	0	11.28	1	1096.99	0.00642269	1096.99	0.0128454	1097	1.17096e-05	1.18054e-05
	8.68	1	1370	0	1370	0	1370	0	0	11.25	1	1097.99	0.0064286	1097.99	0.0128572	1098	1.17096e-05	1.18063e-05
	8.66	1	1371	0	1371	0	1371	0	0	11.25	1	1098.99	0.0064345	1098.99	0.012869	1099	1.17097e-05	1.18063e-05
	8.65	1	1372	0	1372	0	1372	0	0	11.25	1	1099.99	0.0064404	1099.99	0.0128808	1100	1.17098e-05	1.18063e-05
	8.64	1	1374	0	1374	0	1374	0	0	11.24	1	1100.99	0.00644631	1100.99	0.0128926	1101	1.17099e-05	1.18072e-05
	8.63	1	1375	0	1375	0	1375	0	0	11.21	1	1101.99	0.00645221	1101.99	0.0129044	1102	1.171e-05	1.18079e-05
	8.62	1	1376	0	1376	0	1376	0	0	11.21	1	1102.99	0.00645811	1102.99	0.0129162	1103	1.17101e-05	1.18079e-05
	8.61	1	1377	0	1377	0	1377	0	0	11.2	1	1103.99	0.00646402	1103.99	0.012928	1104	1.17102e-05	1.18085e-05
	8.6	1	1378	0	1378	0	1378	0	0	11.18	1	1104.99	0.00646992	1104.99	0.0129398	1105	1.17103e-05	1.1809e-05
	8.58	1	1381	0	1381	0	1381	0	0	11.16	1	1105.99	0.00647583	1105.99	0.0129517	1106	1.17104e-05	1.18099e-05
	8.57	1	1382	0	1382	0	1382	0	0	11.16	1	1106.99	0.00648173	1106.99	0.0129635	1107	1.17104e-05	1.18099e-05
	8.56	1	1383	0	1383	0	1383	0	0	11.16	1	1107.99	0.00648764	1107.99	0.0129753	1108	1.17105e-05	1.18099e-05
	8.55	1	1385	0	1385	0	1385	0	0	11.15	1	1108.99	0.00649354	1108.99	0.0129871	1109	1.17106e-05	1.18108e-05
	8.52	1	1387	0	1387	0	1387	0	0	11.13	1	1109.99	0.00649945	1109.99	0.0129989	1110	1.17107e-05	1.18112e-05
	8.51	1	1388	0	1388	0	1388	0	0	11.11	1	1110.99	0.00650536	1110.99	0.0130107	1111	1.17108e-05	1.18117e-05
	8.5	1	1390	0	1390	0	1390	0	0	11.1	1	1111.99	0.00651126	1111.99	0.0130225	1112	1.17109e-05	1.18124e-05
	8.49	1	1391	0	1391	0	1391	0	0	11.1	1	1112.99	0.00651717	1112.99	0.0130343	1113	1.1711e-05	1.18124e-05
	8.48	1	1392	0	1392	0	1392	0	0	11.08	1	1113.99	0.00652307	1113.99	0.0130461	1114	1.17111e-05	1.18131e-05
	8.46	1	1394	0	1394	0	1394	0	0	11.07	1	1114.99	0.00652898	1114.99	0.013058	1115	1.17112e-05	1.18138e-05
	8.45	1	1396	0	1396	0	1396	0	0	11.07	1	1115.99	0.00653489	1115.99	0.0130698	1116	1.17113e-05	1.18138e-05
	8.44	1	1397	0	1397	0	1397	0	0	11.06	1	1116.99	0.0065408	1116.99	0.0130816	1117	1.17114e-05	1.18147e-05
	8.43	1	1398	0	1398	0	1398	0	0	11.06	1	1117.99	0.0065467	1117.99	0.0130934	1118	1.17115e-05	1.18147e-05
	8.42	1	1401	0	1401	0	1401	0	0	11.05	1	1118.99	0.00655261	1118.99	0.0131052	1119	1.17115e-05	1.18157e-05
	8.41	1	1403	0	1403	0	1403	0	0	11.05	1	1119.99	0.00655852	1119.99	0.013117	1120	1.17116e-05	1.18157e-05
	8.38	1	1404	0	1404	0	1404	0	0	11	1	1120.99	0.00656443	1120.99	0.0131289	1121	1.17117e-05	1.18169e-05
	8.37	1	1405	0	1405	0	1405	0	0	11	1	1121.99	0.00657034	1121.99	0.0131407	1122	1.17118e-05	1.18169e-05
	8.35	1	1406	0	1406	0	1406	0	0	11	1	1122.99	0.00657624	1122.99	0.0131525	1123	1.17119e-05	1.18169e-05
	8.33	1	1407	0	1407	0	1407	0	0	10.99	1	1123.99	0.00658215	1123.99	0.0131643	1124	1.1712e-05	1.18181e-05
	8.32	1	1408	0	1408	0	1408	0	0	10.99	1	1124.99	0.00658806	1124.99	0.0131761	1125	1.17121e-05	1.18181e-05
	8.3	1	1409	0	1409	0	1409	0	0	10.98	1	1125.99	0.00659397	1125.99	0.0131879	1126	1.17122e-05	1.18188e-05
	8.28	1	1410	0	1410	0	1410	0	0	10.94	1	1126.99	0.00659988	1126.99	0.0131998	1127	1.17123e-05	1.18195e-05
	8.27	1	1411	0	1411	0	1411	0	0	10.94	1	1127.99	0.00660579	1127.99	0.0132116	1128	1.17124e-05	1.18195e-05
	8.26	1	1412	0	1412	0	1412	0	0	10.92	1	1128.99	0.0066117	1128.99	0.0132234	1129	1.17125e-05	1.18203e-05
	8.25	1	1416	0	1416	0	1416	0	0	10.91	1	1129.99	0.00661761	1129.99	0.0132352	1130	1.17126e-05	1.18208e-05
	8.24	1	1419	0	1419	0	1419	0	0	10.89	1	1130.99	0.00662352	1130.99	0.013247	1131	1.17127e-05	1.18215e-05
	8.23	1	1421	0	1421	0	1421	0	0	10.89	1	1131.99	0.00662943	1131.99	0.0132589	1132	1.17128e-05	1.18215e-05
	8.22	1	1422	0	1422	0	1422	0	0	10.88	1	1132.99	0.00663534	1132.99	0.0132707	1133	1.17129e-05	1.18223e-05
	8.21	1	1424	0	1424	0	1424	0	0	10.86	1	1133.99	0.00664126	1133.99	0.0132825	1134	1.1713e-05	1.18228e-05
	8.2	1	1427	0	1427	0	1427	0	0	10.85	1	1134.99	0.00664717	1134.99	0.0132943	1135	1.17131e-05	1.18233e-05
	8.19	1	1430	0	1430	0	1430	0	0	10.84	1	1135.99	0.00665308	1135.99	0.0133062	1136	1.17132e-05	1.18238e-05
	8.18	1	1434	0	1434	0	1434	0	0	10.83	1	1136.99	0.00665899	1136.99	0.013318	1137	1.17133e-05	1.18246e-05
	8.17	1	1435	0	1435	0	1435	0	0	10.83	1	1137.99	0.0066649	1137.99	0.0133298	1138	1.17134e-05	1.18246e-05
	8.16	1	1437	0	1437	0	1437	0	0	10.82	1	1138.99	0.00667082	1138.99	0.0133416	1139	1.17135e-05	1.18254e-05
	8.15	1	1438	0	1438	0	1438	0	0	10.81	1	1139.99	0.00667673	1139.99	0.0133535	1140	1.17136e-05	1.18264e-05
	8.14	1	1442	0	1442	0	1442	0	0	10.81	1	1140.99	0.00668264	1140.99	0.0133653	1141	1.17137e-05	1.18264e-05
	8.12	1	1444	0	1444	0	1444	0	0	10.81	1	1141.99	0.00668856	1141.99	0.0133771	1142	1.17138e-05	1.18264e-05
	8.11	1	1450	0	1450	0	1450	0	0	10.77	1	1142.99	0.00669447	1142.99	0.0133889	1143	1.17139e-05	1.18274e-05
	8.1	1	1451	0	1451	0	1451	0	0	10.76	1	1143.99	0.00670038	1143.99	0.0134008	1144	1.1714e-05	1.1828e-05
	8.09	1	1454	0	1454	0	1454	0	0	10.75	1	1144.99	0.0067063	1144.99	0.0134126	1145	1.17141e-05	1.18285e-05
	8.07	1	1458	0	1458	0	1458	0	0	10.74	1	1145.99	0.00671221	1145.99	0.0134244	1146	1.17142e-05	1.18293e-05
	8.06	1	1459	0	1459	0	1459	0	0	10.74	1	1146.99	0.00671813	1146.99	0.0134363	1147	1.17143e-05	1.18293e-05
	8.05	1	1461	0	1461	0	1461	0	0	10.73	1	1147.99	0.00672404	1147.99	0.0134481	1148	1.17144e-05	1.18301e-05
	8.04	1	1462	0	1462	0	1462	0	0	10.72	1	1148.99	0.00672996	1148.99	0.0134599	1149	1.17145e-05	1.18306e-05
	8.03	1	1464	0	1464	0	1464	0	0	10.7	1	1149.99	0.00673587	1149.99	0.0134717	1150	1.17146e-05	1.18312e-05
	8.02	1	1465	0	1465	0	1465	0	0	10.68	1	1150.99	0.00674179	1150.99	0.0134836	1151	1.17147e-05	1.18317e-05
	8.01	1	1467	0	1467	0	1467	0	0	10.67	1	1151.99	0.00674771	1151.99	0.0134954	1152	1.17148e-05	1.18323e-05
	8	1	1469	0	1469	0	1469	0	0	10.66	1	1152.99	0.00675362	1152.99	0.0135072	1153	1.17149e-05	1.18328e-05
	7.99	1	1470	0	1470	0	1470	0	0	10.65	1	1153.99	0.00675954	1153.99	0.0135191	1154	1.1715e-05	1.18334e-05
	7.97	1	1475	0	1475	0	1475	0	0	10.64	1	1154.99	0.00676546	1154.99	0.0135309	1155	1.17151e-05	1.18339e-05
	7.96	1	1476	0	1476	0	1476	0	0	10.62	1	1155.99	0.00677137	1155.99	0.0135427	1156	1.17152e-05	1.18345e-05
	7.95	1	1478	0	1478	0	1478	0	0	10.61	1	1156.99	0.00677729	1156.99	0.0135546	1157	1.17153e-05	1.1835e-05
	7.93	1	1479	0	1479	0	1479	0	0	10.59	1	1157.99	0.00678321	1157.99	0.0135664	1158	1.17154e-05	1.18362e-05
	7.92	1	1480	0	1480	0	1480	0	0	10.59	1	1158.99	0.00678913	1158.99	0.0135783	1159	1.17155e-05	1.18362e-05
	7.9	1	1482	0	1482	0	1482	0	0	10.59	1	1159.99	0.00679504	1159.99	0.0135901	1160	1.17156e-05	1.18362e-05
	7.89	1	1483	0	1483	0	1483	0	0	10.56	1	1160.99	0.00680096	1160.99	0.0136019	1161	1.17157e-05	1.18373e-05
	7.88	1	1486	0	1486	0	1486	0	0	10.55	1	1161.99	0.00680688	1161.99	0.0136138	1162	1.17158e-05	1.18379e-05
	7.87	1	1487	0	1487	0	1487	0	0	10.53	1	1162.99	0.0068128	1162.99	0.0136256	1163	1.17159e-05	1.18385e-05
	7.86	1	1489	0	1489	0	1489	0	0	10.52	1	1163.99	0.00681872	1163.99	0.0136374	1164	1.1716e-05	1.1839e-05
	7.85	1	1494	0	1494	0	1494	0	0	10.5	1	1164.99	0.00682464	1164.99	0.0136493	1165	1.17161e-05	1.18399e-05
	7.84	1	1495	0	1495	0	1495	0	0	10.5	1	1165.99	0.00683056	1165.99	0.0136611	1166	1.17162e-05	1.18399e-05
	7.83	1	1497	0	1497	0	1497	0	0	10.49	1	1166.99	0.00683648	1166.99	0.013673	1167	1.17163e-05	1.18411e-05
	7.8	1	1500	0	1500	0	1500	0	0	10.49	1	1167.99	0.0068424	1167.99	0.0136848	1168	1.17164e-05	1.18411e-05
	7.78	1	1502	0	1502	0	1502	0	0	10.48	1	1168.99	0.00684832	1168.99	0.0136966	1169	1.17165e-05	1.18419e-05
	7.77	1	1506	0	1506	0	1506	0	0	10.47	1	1169.99	0.00685424	1169.99	0.0137085	1170	1.17167e-05	1.18425e-05
	7.76	1	1508	0	1508	0	1508	0	0	10.46	1	1170.99	0.00686017	1170.99	0.0137203	1171	1.17168e-05	1.18431e-05
	7.75	1	1509	0	1509	0	1509	0	0	10.45	1	1171.99	0.00686609	1171.99	0.0137322	1172	1.17169e-05	1.1844e-05
	7.74	1	1510	0	1510	0	1510	0	0	10.45	1	1172.99	0.00687201	1172.99	0.013744	1173	1.1717e-05	1.1844e-05
	7.73	1	1513	0	1513	0	1513	0	0	10.42	1	1173.99	0.00687793	1173.99	0.0137559	1174	1.17171e-05	1.18449e-05
	7.72	1	1514	0	1514	0	1514	0	0	10.41	1	1174.99	0.00688385	1174.99	0.0137677	1175	1.17172e-05	1.18455e-05
	7.71	1	1518	0	1518	0	1518	0	0	10.4	1	1175.99	0.00688978	1175.99	0.0137796	1176	1.17173e-05	1.18461e-05
	7.7	1	1519	0	1519	0	1519	0	0	10.39	1	1176.99	0.0068957	1176.99	0.0137914	1177	1.17174e-05	1.18468e-05
	7.67	1	1520	0	1520	0	1520	0	0	10.38	1	1177.99	0.00690162	1177.99	0.0138032	1178	1.17175e-05	1.18474e-05
	7.66	1	1521	0	1521	0	1521	0	0	10.36	1	1178.99	0.00690755	1178.99	0.0138151	1179	1.17176e-05	1.18486e-05
	7.65	1	1526	0	1526	0	1526	0	0	10.36	1	1179.99	0.00691347	1179.99	0.0138269	1180	1.17178e-05	1.18486e-05
	7.64	1	1529	0	1529	0	1529	0	0	10.36	1	1180.99	0.0069194	1180.99	0.0138388	1181	1.17179e-05	1.18486e-05
	7.62	1	1530	0	1530	0	1530	0	0	10.35	1	1181.99	0.00692532	1181.99	0.0138506	1182	1.1718e-05	1.18502e-05
	7.61	1	1534	0	1534	0	1534	0	0	10.35	1	1182.99	0.00693125	1182.99	0.0138625	1183	1.17181e-05	1.18502e-05
	7.6	1	1537	0	1537	0	1537	0	0	10.33	1	1183.99	0.00693717	1183.99	0.0138743	1184	1.17182e-05	1.1852e-05
	7.59	1	1541	0	1541	0	1541	0	0	10.33	1	1184.99	0.0069431	1184.99	0.0138862	1185	1.17183e-05	1.1852e-05
	7.58	1	1545	0	1545	0	1545	0	0	10.33	1	1185.99	0.00694903	1185.99	0.0138981	1186	1.17184e-05	1.1852e-05
	7.56	1	1546	0	1546	0	1546	0	0	10.33	1	1186.99	0.00695495	1186.99	0.0139099	1187	1.17185e-05	1.1852e-05
	7.54	1	1548	0	1548	0	1548	0	0	10.31	1	1187.99	0.00696088	1187.99	0.0139218	1188	1.17187e-05	1.18536e-05
	7.53	1	1549	0	1549	0	1549	0	0	10.3	1	1188.99	0.00696681	1188.99	0.0139336	1189	1.17188e-05	1.18543e-05
	7.52	1	1550	0	1550	0	1550	0	0	10.27	1	1189.99	0.00697273	1189.99	0.0139455	1190	1.17189e-05	1.18549e-05
	7.49	1	1552	0	1552	0	1552	0	0	10.26	1	1190.99	0.00697866	1190.99	0.0139573	1191	1.1719e-05	1.18562e-05
	7.48	1	1553	0	1553	0	1553	0	0	10.26	1	1191.99	0.00698459	1191.99	0.0139692	1192	1.17191e-05	1.18562e-05
	7.46	1	1556	0	1556	0	1556	0	0	10.26	1	1192.99	0.00699052	1192.99	0.013981	1193	1.17192e-05	1.18562e-05
	7.45	1	1559	0	1559	0	1559	0	0	10.25	1	1193.99	0.00699645	1193.99	0.0139929	1194	1.17193e-05	1.18579e-05
	7.44	1	1562	0	1562	0	1562	0	0	10.25	1	1194.99	0.00700238	1194.99	0.0140048	1195	1.17195e-05	1.18579e-05
	7.43	1	1563	0	1563	0	1563	0	0	10.24	1	1195.99	0.0070083	1195.99	0.0140166	1196	1.17196e-05	1.18592e-05
	7.42	1	1567	0	1567	0	1567	0	0	10.24	1	1196.99	0.00701423	1196.99	0.0140285	1197	1.17197e-05	1.18592e-05
	7.41	1	1568	0	1568	0	1568	0	0	10.23	1	1197.99	0.00702016	1197.99	0.0140403	1198	1.17198e-05	1.18602e-05
	7.4	1	1569	0	1569	0	1569	0	0	10.2	1	1198.99	0.0070261	1198.99	0.0140522	1199	1.17199e-05	1.18612e-05
	7.38	1	1570	0	1570	0	1570	0	0	10.2	1	1199.99	0.00703203	1199.99	0.0140641	1200	1.172e-05	1.18612e-05
	7.37	1	1573	0	1573	0	1573	0	0	10.18	1	1200.99	0.00703796	1200.99	0.0140759	1201	1.17202e-05	1.18626e-05
	7.36	1	1574	0	1574	0	1574	0	0	10.18	1	1201.99	0.00704389	1201.99	0.0140878	1202	1.17203e-05	1.18626e-05
	7.34	1	1575	0	1575	0	1575	0	0	10.17	1	1202.99	0.00704982	1202.99	0.0140996	1203	1.17204e-05	1.18639e-05
	7.33	1	1576	0	1576	0	1576	0	0	10.17	1	1203.99	0.00705575	1203.99	0.0141115	1204	1.17205e-05	1.18639e-05
	7.32	1	1577	0	1577	0	1577	0	0	10.15	1	1204.99	0.00706169	1204.99	0.0141234	1205	1.17206e-05	1.1865e-05
	7.31	1	1578	0	1578	0	1578	0	0	10.13	1	1205.99	0.00706762	1205.99	0.0141352	1206	1.17208e-05	1.18657e-05
	7.29	1	1579	0	1579	0	1579	0	0	10.12	1	1206.99	0.00707355	1206.99	0.0141471	1207	1.17209e-05	1.18664e-05
	7.28	1	1580	0	1580	0	1580	0	0	10.11	1	1207.99	0.00707948	1207.99	0.014159	1208	1.1721e-05	1.18678e-05
	7.25	1	1582	0	1582	0	1582	0	0	10.11	1	1208.99	0.00708542	1208.99	0.0141708	1209	1.17211e-05	1.18678e-05
	7.22	1	1586	0	1586	0	1586	0	0	10.11	1	1209.99	0.00709135	1209.99	0.0141827	1210	1.17212e-05	1.18678e-05
	7.21	1	1587	0	1587	0	1587	0	0	10.1	1	1210.99	0.00709729	1210.99	0.0141946	1211	1.17214e-05	1.18692e-05
	7.18	1	1588	0	1588	0	1588	0	0	10.06	1	1211.99	0.00710322	1211.99	0.0142064	1212	1.17215e-05	1.18703e-05
	7.17	1	1590	0	1590	0	1590	0	0	10.06	1	1212.99	0.00710916	1212.99	0.0142183	1213	1.17216e-05	1.18703e-05
	7.15	1	1593	0	1593	0	1593	0	0	10.05	1	1213.99	0.00711509	1213.99	0.0142302	1214	1.17217e-05	1.18713e-05
	7.14	1	1594	0	1594	0	1594	0	0	10.04	1	1214.99	0.00712103	1214.99	0.0142421	1215	1.17219e-05	1.18721e-05
	7.13	1	1595	0	1595	0	1595	0	0	10.03	1	1215.99	0.00712697	1215.99	0.0142539	1216	1.1722e-05	1.18731e-05
	7.12	1	1597	0	1597	0	1597	0	0	10.03	1	1216.99	0.0071329	1216.99	0.0142658	1217	1.17221e-05	1.18731e-05
	7.11	1	1600	0	1600	0	1600	0	0	10.02	1	1217.99	0.00713884	1217.99	0.0142777	1218	1.17222e-05	1.18746e-05
	7.1	1	1601	0	1601	0	1601	0	0	10.02	1	1218.99	0.00714478	1218.99	0.0142896	1219	1.17224e-05	1.18746e-05
	7.09	1	1603	0	1603	0	1603	0	0	10	1	1219.99	0.00715071	1219.99	0.0143014	1220	1.17225e-05	1.18768e-05
	7.07	1	1607	0	1607	0	1607	0	0	10	1	1220.99	0.00715665	1220.99	0.0143133	1221	1.17226e-05	1.18768e-05
	7.06	1	1609	0	1609	0	1609	0	0	10	1	1221.99	0.00716259	1221.99	0.0143252	1222	1.17227e-05	1.18768e-05
	7.05	1	1612	0	1612	0	1612	0	0	10	1	1222.99	0.00716853	1222.99	0.0143371	1223	1.17229e-05	1.18768e-05
	7.04	1	1615	0	1615	0	1615	0	0	9.97	1	1223.99	0.00717447	1223.99	0.0143489	1224	1.1723e-05	1.18787e-05
	7.03	1	1617	0	1617	0	1617	0	0	9.96	1	1224.99	0.00718041	1224.99	0.0143608	1225	1.17231e-05	1.18795e-05
	7.02	1	1621	0	1621	0	1621	0	0	9.95	1	1225.99	0.00718635	1225.99	0.0143727	1226	1.17232e-05	1.18802e-05
	7	1	1622	0	1622	0	1622	0	0	9.94	1	1226.99	0.00719229	1226.99	0.0143846	1227	1.17234e-05	1.18814e-05
	6.99	1	1625	0	1625	0	1625	0	0	9.94	1	1227.99	0.00719823	1227.99	0.0143965	1228	1.17235e-05	1.18814e-05
	6.98	1	1628	0	1628	0	1628	0	0	9.93	1	1228.99	0.00720417	1228.99	0.0144083	1229	1.17236e-05	1.18825e-05
	6.97	1	1629	0	1629	0	1629	0	0	9.92	1	1229.99	0.00721011	1229.99	0.0144202	1230	1.17238e-05	1.18841e-05
	6.96	1	1630	0	1630	0	1630	0	0	9.92	1	1230.99	0.00721606	1230.99	0.0144321	1231	1.17239e-05	1.18841e-05
	6.95	1	1632	0	1632	0	1632	0	0	9.92	1	1231.99	0.007222	1231.99	0.014444	1232	1.1724e-05	1.18841e-05
	6.94	1	1636	0	1636	0	1636	0	0	9.9	1	1232.99	0.00722794	1232.99	0.0144559	1233	1.17242e-05	1.18856e-05
	6.93	1	1638	0	1638	0	1638	0	0	9.88	1	1233.99	0.00723388	1233.99	0.0144678	1234	1.17243e-05	1.18864e-05
	6.92	1	1639	0	1639	0	1639	0	0	9.87	1	1234.99	0.00723983	1234.99	0.0144797	1235	1.17244e-05	1.18872e-05
	6.9	1	1644	0	1644	0	1644	0	0	9.86	1	1235.99	0.00724577	1235.99	0.0144915	1236	1.17246e-05	1.18884e-05
	6.89	1	1645	0	1645	0	1645	0	0	9.86	1	1236.99	0.00725172	1236.99	0.0145034	1237	1.17247e-05	1.18884e-05
	6.88	1	1647	0	1647	0	1647	0	0	9.84	1	1237.99	0.00725766	1237.99	0.0145153	1238	1.17248e-05	1.189e-05
	6.87	1	1648	0	1648	0	1648	0	0	9.84	1	1238.99	0.00726361	1238.99	0.0145272	1239	1.1725e-05	1.189e-05
	6.86	1	1649	0	1649	0	1649	0	0	9.83	1	1239.99	0.00726955	1239.99	0.0145391	1240	1.17251e-05	1.18912e-05
	6.85	1	1651	0	1651	0	1651	0	0	9.81	1	1240.99	0.0072755	1240.99	0.014551	1241	1.17252e-05	1.18925e-05
	6.83	1	1652	0	1652	0	1652	0	0	9.81	1	1241.99	0.00728144	1241.99	0.0145629	1242	1.17254e-05	1.18925e-05
	6.82	1	1653	0	1653	0	1653	0	0	9.8	1	1242.99	0.00728739	1242.99	0.0145748	1243	1.17255e-05	1.18941e-05
	6.81	1	1654	0	1654	0	1654	0	0	9.8	1	1243.99	0.00729334	1243.99	0.0145867	1244	1.17256e-05	1.18941e-05
	6.8	1	1656	0	1656	0	1656	0	0	9.78	1	1244.99	0.00729929	1244.99	0.0145986	1245	1.17258e-05	1.18953e-05
	6.79	1	1657	0	1657	0	1657	0	0	9.77	1	1245.99	0.00730523	1245.99	0.0146105	1246	1.17259e-05	1.18962e-05
	6.78	1	1662	0	1662	0	1662	0	0	9.76	1	1246.99	0.00731118	1246.99	0.0146224	1247	1.1726e-05	1.1897e-05
	6.77	1	1664	0	1664	0	1664	0	0	9.74	1	1247.99	0.00731713	1247.99	0.0146343	1248	1.17262e-05	1.18978e-05
	6.76	1	1669	0	1669	0	1669	0	0	9.71	1	1248.99	0.00732308	1248.99	0.0146462	1249	1.17263e-05	1.18987e-05
	6.75	1	1671	0	1671	0	1671	0	0	9.69	1	1249.99	0.00732903	1249.99	0.0146581	1250	1.17264e-05	1.19004e-05
	6.74	1	1676	0	1676	0	1676	0	0	9.69	1	1250.99	0.00733498	1250.99	0.01467	1251	1.17266e-05	1.19004e-05
	6.73	1	1677	0	1677	0	1677	0	0	9.69	1	1251.99	0.00734093	1251.99	0.0146819	1252	1.17267e-05	1.19004e-05
	6.72	1	1681	0	1681	0	1681	0	0	9.66	1	1252.99	0.00734688	1252.99	0.0146938	1253	1.17269e-05	1.19021e-05
	6.71	1	1685	0	1685	0	1685	0	0	9.65	1	1253.99	0.00735283	1253.99	0.0147057	1254	1.1727e-05	1.1903e-05
	6.7	1	1689	0	1689	0	1689	0	0	9.64	1	1254.99	0.00735879	1254.99	0.0147176	1255	1.17271e-05	1.19043e-05
	6.69	1	1690	0	1690	0	1690	0	0	9.64	1	1255.99	0.00736474	1255.99	0.0147295	1256	1.17273e-05	1.19043e-05
	6.68	1	1691	0	1691	0	1691	0	0	9.63	1	1256.99	0.00737069	1256.99	0.0147414	1257	1.17274e-05	1.19056e-05
	6.67	1	1693	0	1693	0	1693	0	0	9.61	1	1257.99	0.00737664	1257.99	0.0147533	1258	1.17276e-05	1.19065e-05
	6.64	1	1695	0	1695	0	1695	0	0	9.59	1	1258.99	0.0073826	1258.99	0.0147652	1259	1.17277e-05	1.19073e-05
	6.63	1	1698	0	1698	0	1698	0	0	9.56	1	1259.99	0.00738855	1259.99	0.0147771	1260	1.17279e-05	1.19091e-05
	6.6	1	1699	0	1699	0	1699	0	0	9.56	1	1260.99	0.00739451	1260.99	0.014789	1261	1.1728e-05	1.19091e-05
	6.59	1	1701	0	1701	0	1701	0	0	9.56	1	1261.99	0.00740046	1261.99	0.0148009	1262	1.17281e-05	1.19091e-05
	6.58	1	1702	0	1702	0	1702	0	0	9.55	1	1262.99	0.00740642	1262.99	0.0148128	1263	1.17283e-05	1.19114e-05
	6.57	1	1704	0	1704	0	1704	0	0	9.55	1	1263.99	0.00741237	1263.99	0.0148247	1264	1.17284e-05	1.19114e-05
	6.56	1	1706	0	1706	0	1706	0	0	9.54	1	1264.99	0.00741833	1264.99	0.0148367	1265	1.17286e-05	1.19127e-05
	6.55	1	1707	0	1707	0	1707	0	0	9.51	1	1265.99	0.00742429	1265.99	0.0148486	1266	1.17287e-05	1.19136e-05
	6.54	1	1711	0	1711	0	1711	0	0	9.5	1	1266.99	0.00743024	1266.99	0.0148605	1267	1.17289e-05	1.19146e-05
	6.53	1	1712	0	1712	0	1712	0	0	9.49	1	1267.99	0.0074362	1267.99	0.0148724	1268	1.1729e-05	1.19155e-05
	6.52	1	1717	0	1717	0	1717	0	0	9.48	1	1268.99	0.00744216	1268.99	0.0148843	1269	1.17292e-05	1.19164e-05
	6.51	1	1719	0	1719	0	1719	0	0	9.47	1	1269.99	0.00744812	1269.99	0.0148962	1270	1.17293e-05	1.19178e-05
	6.5	1	1720	0	1720	0	1720	0	0	9.47	1	1270.99	0.00745408	1270.99	0.0149082	1271	1.17295e-05	1.19178e-05
	6.49	1	1722	0	1722	0	1722	0	0	9.45	1	1271.99	0.00746004	1271.99	0.0149201	1272	1.17296e-05	1.19192e-05
	6.47	1	1723	0	1723	0	1723	0	0	9.44	1	1272.99	0.007466	1272.99	0.014932	1273	1.17298e-05	1.19201e-05
	6.46	1	1725	0	1725	0	1725	0	0	9.43	1	1273.99	0.00747196	1273.99	0.0149439	1274	1.17299e-05	1.19216e-05
	6.45	1	1727	0	1727	0	1727	0	0	9.43	1	1274.99	0.00747792	1274.99	0.0149558	1275	1.17301e-05	1.19216e-05
	6.44	1	1729	0	1729	0	1729	0	0	9.42	1	1275.99	0.00748388	1275.99	0.0149678	1276	1.17302e-05	1.19235e-05
	6.43	1	1731	0	1731	0	1731	0	0	9.42	1	1276.99	0.00748984	1276.99	0.0149797	1277	1.17304e-05	1.19235e-05
	6.42	1	1737	0	1737	0	1737	0	0	9.4	1	1277.99	0.0074958	1277.99	0.0149916	1278	1.17305e-05	1.19254e-05
	6.41	1	1738	0	1738	0	1738	0	0	9.4	1	1278.99	0.00750177	1278.98	0.0150035	1279	1.17307e-05	1.19254e-05
	6.4	1	1740	0	1740	0	1740	0	0	9.39	1	1279.99	0.00750773	1279.98	0.0150155	1280	1.17308e-05	1.19274e-05
	6.39	1	1741	0	1741	0	1741	0	0	9.39	1	1280.99	0.0075137	1280.98	0.0150274	1281	1.1731e-05	1.19274e-05
	6.37	1	1744	0	1744	0	1744	0	0	9.38	1	1281.99	0.00751966	1281.98	0.0150393	1282	1.17311e-05	1.19293e-05
	6.36	1	1745	0	1745	0	1745	0	0	9.38	1	1282.99	0.00752562	1282.98	0.0150512	1283	1.17313e-05	1.19293e-05
	6.35	1	1747	0	1747	0	1747	0	0	9.36	1	1283.99	0.00753159	1283.98	0.0150632	1284	1.17314e-05	1.19308e-05
	6.34	1	1750	0	1750	0	1750	0	0	9.35	1	1284.99	0.00753756	1284.98	0.0150751	1285	1.17316e-05	1.19318e-05
	6.33	1	1752	0	1752	0	1752	0	0	9.34	1	1285.99	0.00754352	1285.98	0.015087	1286	1.17318e-05	1.19333e-05
	6.32	1	1756	0	1756	0	1756	0	0	9.34	1	1286.99	0.00754949	1286.98	0.015099	1287	1.17319e-05	1.19333e-05
	6.31	1	1759	0	1759	0	1759	0	0	9.33	1	1287.99	0.00755546	1287.98	0.0151109	1288	1.17321e-05	1.19348e-05
	6.3	0.999999	1760	0	1760	0	1760	0	0	9.32	1	1288.99	0.00756142	1288.98	0.0151228	1289	1.17322e-05	1.19363e-05
	6.29	0.999999	1762	0	1762	0	1762	0	0	9.32	1	1289.99	0.00756739	1289.98	0.0151348	1290	1.17324e-05	1.19363e-05
	6.28	0.999999	1763	0	1763	0	1763	0	0	9.31	1	1290.99	0.00757336	1290.98	0.0151467	1291	1.17326e-05	1.19394e-05
	6.27	0.999999	1765	0	1765	0	1765	0	0	9.31	1	1291.99	0.00757933	1291.98	0.0151587	1292	1.17327e-05	1.19394e-05
	6.26	0.999999	1768	0	1768	0	1768	0	0	9.31	1	1292.99	0.0075853	1292.98	0.0151706	1293	1.17329e-05	1.19394e-05
	6.24	0.999999	1771	0	1771	0	1771	0	0	9.31	1	1293.99	0.00759127	1293.98	0.0151825	1294	1.1733e-05	1.19394e-05
	6.23	0.999999	1773	0	1773	0	1773	0	0	9.3	1	1294.99	0.00759724	1294.98	0.0151945	1295	1.17332e-05	1.19425e-05
	6.21	0.999999	1776	0	1776	0	1776	0	0	9.3	1	1295.99	0.00760321	1295.98	0.0152064	1296	1.17334e-05	1.19425e-05
	6.2	0.999999	1779	0	1779	0	1779	0	0	9.29	1	1296.99	0.00760919	1296.98	0.0152184	1297	1.17335e-05	1.19447e-05
	6.19	0.999999	1782	0	1782	0	1782	0	0	9.29	1	1297.99	0.00761516	1297.98	0.0152303	1298	1.17337e-05	1.19447e-05
	6.18	0.999999	1786	0	1786	0	1786	0	0	9.28	1	1298.99	0.00762113	1298.98	0.0152423	1299	1.17338e-05	1.19468e-05
	6.17	0.999999	1791	0	1791	0	1791	0	0	9.28	1	1299.99	0.00762711	1299.98	0.0152542	1300	1.1734e-05	1.19468e-05
	6.16	0.999999	1796	0	1796	0	1796	0	0	9.27	1	1300.99	0.00763308	1300.98	0.0152662	1301	1.17342e-05	1.19495e-05
	6.15	0.999999	1799	0	1799	0	1799	0	0	9.27	1	1301.99	0.00763905	1301.98	0.0152781	1302	1.17343e-05	1.19495e-05
	6.14	0.999999	1801	0	1801	0	1801	0	0	9.27	1	1302.99	0.00764503	1302.98	0.0152901	1303	1.17345e-05	1.19495e-05
	6.13	0.999999	1803	0	1803	0	1803	0	0	9.24	1	1303.99	0.00765101	1303.98	0.015302	1304	1.17347e-05	1.19516e-05
	6.12	0.999999	1804	0	1804	0	1804	0	0	9.2	1	1304.99	0.00765698	1304.98	0.015314	1305	1.17348e-05	1.19533e-05
	6.11	0.999999	1808	0	1808	0	1808	0	0	9.2	1	1305.99	0.00766296	1305.98	0.0153259	1306	1.1735e-05	1.19533e-05
	6.1	0.999999	1810	0	1810	0	1810	0	0	9.19	1	1306.99	0.00766894	1306.98	0.0153379	1307	1.17352e-05	1.19549e-05
	6.09	0.999999	1812	0	1812	0	1812	0	0	9.18	1	1307.99	0.00767491	1307.98	0.0153498	1308	1.17353e-05	1.19561e-05
	6.08	0.999999	1816	0	1816	0	1816	0	0	9.16	1	1308.99	0.00768089	1308.98	0.0153618	1309	1.17355e-05	1.19583e-05
	6.07	0.999999	1818	0	1818	0	1818	0	0	9.16	1	1309.99	0.00768687	1309.98	0.0153737	1310	1.17357e-05	1.19583e-05
	6.06	0.999999	1821	0	1821	0	1821	0	0	9.16	1	1310.99	0.00769285	1310.98	0.0153857	1311	1.17359e-05	1.19583e-05
	6.05	0.999999	1828	0	1828	0	1828	0	0	9.13	1	1311.99	0.00769883	1311.98	0.0153977	1312	1.1736e-05	1.19605e-05
	6.04	0.999999	1831	0	1831	0	1831	0	0	9.1	1	1312.99	0.00770481	1312.98	0.0154096	1313	1.17362e-05	1.19622e-05
	6.03	0.999999	1835	0	1835	0	1835	0	0	9.1	1	1313.99	0.00771079	1313.98	0.0154216	1314	1.17364e-05	1.19622e-05
	6.02	0.999999	1841	0	1841	0	1841	0	0	9.09	1	1314.99	0.00771678	1314.98	0.0154336	1315	1.17365e-05	1.19657e-05
	6.01	0.999999	1844	0	1844	0	1844	0	0	9.09	1	1315.99	0.00772276	1315.98	0.0154455	1316	1.17367e-05	1.19657e-05
	6	0.999999	1855	0	1855	0	1855	0	0	9.09	1	1316.99	0.00772874	1316.98	0.0154575	1317	1.17369e-05	1.19657e-05
	5.98	0.999999	1856	0	1856	0	1856	0	0	9.09	1	1317.99	0.00773473	1317.98	0.0154695	1318	1.17371e-05	1.19657e-05
	5.97	0.999999	1857	0	1857	0	1857	0	0	9.08	1	1318.99	0.00774071	1318.98	0.0154814	1319	1.17372e-05	1.19686e-05
	5.95	0.999999	1858	0	1858	0	1858	0	0	9.07	1	1319.99	0.0077467	1319.98	0.0154934	1320	1.17374e-05	1.1971e-05
	5.94	0.999999	1860	0	1860	0	1860	0	0	9.07	1	1320.99	0.00775268	1320.98	0.0155054	1321	1.17376e-05	1.1971e-05
	5.93	0.999999	1861	0	1861	0	1861	0	0	9.07	1	1321.99	0.00775867	1321.98	0.0155173	1322	1.17378e-05	1.1971e-05
	5.92	0.999999	1863	0	1863	0	1863	0	0	9.06	1	1322.99	0.00776465	1322.98	0.0155293	1323	1.17379e-05	1.19733e-05
	5.91	0.999999	1865	0	1865	0	1865	0	0	9.05	1	1323.99	0.00777064	1323.98	0.0155413	1324	1.17381e-05	1.19745e-05
	5.89	0.999999	1866	0	1866	0	1866	0	0	9.04	1	1324.99	0.00777663	1324.98	0.0155533	1325	1.17383e-05	1.19757e-05
	5.88	0.999999	1867	0	1867	0	1867	0	0	9.03	1	1325.99	0.00778262	1325.98	0.0155652	1326	1.17385e-05	1.19769e-05
	5.86	0.999999	1869	0	1869	0	1869	0	0	9.02	1	1326.99	0.00778861	1326.98	0.0155772	1327	1.17387e-05	1.19782e-05
	5.85	0.999999	1872	0	1872	0	1872	0	0	9.01	1	1327.99	0.0077946	1327.98	0.0155892	1328	1.17388e-05	1.19794e-05
	5.84	0.999999	1873	0	1873	0	1873	0	0	9	1	1328.99	0.00780059	1328.98	0.0156012	1329	1.1739e-05	1.19806e-05
	5.83	0.999999	1874	0	1874	0	1874	0	0	8.99	1	1329.99	0.00780658	1329.98	0.0156132	1330	1.17392e-05	1.19818e-05
	5.82	0.999998	1875	0	1875	0	1875	0	0	8.97	1	1330.99	0.00781257	1330.98	0.0156251	1331	1.17394e-05	1.19837e-05
	5.81	0.999998	1877	0	1877	0	1877	0	0	8.97	1	1331.99	0.00781856	1331.98	0.0156371	1332	1.17396e-05	1.19837e-05
	5.8	0.999998	1883	0	1883	0	1883	0	0	8.95	1	1332.99	0.00782455	1332.98	0.0156491	1333	1.17398e-05	1.19862e-05
	5.79	0.999998	1885	0	1885	0	1885	0	0	8.95	1	1333.99	0.00783055	1333.98	0.0156611	1334	1.174e-05	1.19862e-05
	5.78	0.999998	1889	0	1889	0	1889	0	0	8.93	1	1334.99	0.00783654	1334.98	0.0156731	1335	1.17401e-05	1.19887e-05
	5.77	0.999998	1892	0	1892	0	1892	0	0	8.93	1	1335.99	0.00784254	1335.98	0.0156851	1336	1.17403e-05	1.19887e-05
	5.76	0.999998	1895	0	1895	0	1895	0	0	8.92	1	1336.99	0.00784853	1336.98	0.0156971	1337	1.17405e-05	1.19906e-05
	5.73	0.999998	1896	0	1896	0	1896	0	0	8.91	1	1337.99	0.00785453	1337.98	0.0157091	1338	1.17407e-05	1.19925e-05
	5.72	0.999998	1898	0	1898	0	1898	0	0	8.91	1	1338.99	0.00786052	1338.98	0.015721	1339	1.17409e-05	1.19925e-05
	5.7	0.999998	1899	0	1899	0	1899	0	0	8.9	1	1339.99	0.00786652	1339.98	0.015733	1340	1.17411e-05	1.19945e-05
	5.69	0.999998	1901	0	1901	0	1901	0	0	8.88	1	1340.99	0.00787252	1340.98	0.015745	1341	1.17413e-05	1.19958e-05
	5.68	0.999998	1902	0	1902	0	1902	0	0	8.87	1	1341.99	0.00787852	1341.98	0.015757	1342	1.17415e-05	1.19971e-05
	5.67	0.999998	1905	0	1905	0	1905	0	0	8.86	1	1342.99	0.00788452	1342.98	0.015769	1343	1.17416e-05	1.20004e-05
	5.65	0.999998	1907	0	1907	0	1907	0	0	8.86	1	1343.99	0.00789052	1343.98	0.015781	1344	1.17418e-05	1.20004e-05
	5.64	0.999998	1908	0	1908	0	1908	0	0	8.86	1	1344.99	0.00789652	1344.98	0.015793	1345	1.1742e-05	1.20004e-05
	5.63	0.999998	1912	0	1912	0	1912	0	0	8.86	1	1345.99	0.00790252	1345.98	0.015805	1346	1.17422e-05	1.20004e-05
	5.62	0.999998	1916	0	1916	0	1916	0	0	8.84	1	1346.99	0.00790852	1346.98	0.015817	1347	1.17424e-05	1.2005e-05
	5.6	0.999997	1917	0	1917	0	1917	0	0	8.84	1	1347.99	0.00791452	1347.98	0.015829	1348	1.17426e-05	1.2005e-05
	5.59	0.999997	1918	0	1918	0	1918	0	0	8.84	1	1348.99	0.00792053	1348.98	0.0158411	1349	1.17428e-05	1.2005e-05
	5.58	0.999997	1919	0	1919	0	1919	0	0	8.82	1	1349.99	0.00792653	1349.98	0.0158531	1350	1.1743e-05	1.20077e-05
	5.57	0.999997	1921	0	1921	0	1921	0	0	8.81	1	1350.99	0.00793253	1350.98	0.0158651	1351	1.17432e-05	1.20105e-05
	5.56	0.999997	1924	0	1924	0	1924	0	0	8.81	1	1351.99	0.00793854	1351.98	0.0158771	1352	1.17434e-05	1.20105e-05
	5.55	0.999997	1925	0	1925	0	1925	0	0	8.81	1	1352.99	0.00794454	1352.98	0.0158891	1353	1.17436e-05	1.20105e-05
	5.54	0.999997	1927	0	1927	0	1927	0	0	8.8	1	1353.99	0.00795055	1353.98	0.0159011	1354	1.17438e-05	1.20139e-05
	5.53	0.999997	1929	0	1929	0	1929	0	0	8.8	1	1354.99	0.00795656	1354.98	0.0159131	1355	1.1744e-05	1.20139e-05
	5.51	0.999997	1930	0	1930	0	1930	0	0	8.77	1	1355.99	0.00796257	1355.98	0.0159251	1356	1.17442e-05	1.2016e-05
	5.5	0.999997	1931	0	1931	0	1931	0	0	8.76	1	1356.99	0.00796858	1356.98	0.0159372	1357	1.17444e-05	1.20195e-05
	5.49	0.999997	1932	0	1932	0	1932	0	0	8.76	1	1357.99	0.00797458	1357.98	0.0159492	1358	1.17446e-05	1.20195e-05
	5.48	0.999997	1936	0	1936	0	1936	0	0	8.76	1	1358.99	0.00798059	1358.98	0.0159612	1359	1.17448e-05	1.20195e-05
	5.47	0.999997	1937	0	1937	0	1937	0	0	8.76	1	1359.99	0.00798661	1359.98	0.0159732	1360	1.1745e-05	1.20195e-05
	5.46	0.999997	1939	0	1939	0	1939	0	0	8.75	1	1360.99	0.00799262	1360.98	0.0159852	1361	1.17452e-05	1.20238e-05
	5.45	0.999996	1940	0	1940	0	1940	0	0	8.75	1	1361.99	0.00799863	1361.98	0.0159973	1362	1.17454e-05	1.20238e-05
	5.43	0.999996	1943	0	1943	0	1943	0	0	8.73	1	1362.99	0.00800464	1362.98	0.0160093	1363	1.17456e-05	1.20259e-05
	5.42	0.999996	1945	0	1945	0	1945	0	0	8.72	1	1363.99	0.00801066	1363.98	0.0160213	1364	1.17458e-05	1.20274e-05
	5.41	0.999996	1946	0	1946	0	1946	0	0	8.71	1	1364.99	0.00801667	1364.98	0.0160333	1365	1.1746e-05	1.20288e-05
	5.4	0.999996	1947	0	1947	0	1947	0	0	8.7	1	1365.99	0.00802269	1365.98	0.0160454	1366	1.17462e-05	1.2031e-05
	5.39	0.999996	1950	0	1950	0	1950	0	0	8.7	1	1366.99	0.0080287	1366.98	0.0160574	1367	1.17465e-05	1.2031e-05
	5.38	0.999996	1951	0	1951	0	1951	0	0	8.69	1	1367.99	0.00803472	1367.98	0.0160694	1368	1.17467e-05	1.2034e-05
	5.36	0.999996	1955	0	1955	0	1955	0	0	8.69	1	1368.99	0.00804074	1368.98	0.0160815	1369	1.17469e-05	1.2034e-05
	5.35	0.999996	1957	0	1957	0	1957	0	0	8.68	1	1369.99	0.00804675	1369.98	0.0160935	1370	1.17471e-05	1.20362e-05
	5.34	0.999995	1958	0	1958	0	1958	0	0	8.66	1	1370.99	0.00805277	1370.98	0.0161055	1371	1.17473e-05	1.20377e-05
	5.33	0.999995	1961	0	1961	0	1961	0	0	8.65	1	1371.99	0.00805879	1371.98	0.0161176	1372	1.17475e-05	1.20392e-05
	5.32	0.999995	1965	0	1965	0	1965	0	0	8.64	1	1372.99	0.00806481	1372.98	0.0161296	1373	1.17477e-05	1.20415e-05
	5.31	0.999995	1967	0	1967	0	1967	0	0	8.64	1	1373.99	0.00807083	1373.98	0.0161417	1374	1.17479e-05	1.20415e-05
	5.3	0.999995	1968	0	1968	0	1968	0	0	8.63	1	1374.99	0.00807686	1374.98	0.0161537	1375	1.17482e-05	1.20438e-05
	5.29	0.999995	1969	0	1969	0	1969	0	0	8.62	1	1375.99	0.00808288	1375.98	0.0161658	1376	1.17484e-05	1.20453e-05
	5.28	0.999995	1971	0	1971	0	1971	0	0	8.61	1	1376.99	0.0080889	1376.98	0.0161778	1377	1.17486e-05	1.20469e-05
	5.27	0.999995	1972	0	1972	0	1972	0	0	8.6	1	1377.99	0.00809493	1377.98	0.0161899	1378	1.17488e-05	1.20484e-05
	5.26	0.999995	1975	0	1975	0	1975	0	0	8.58	1	1378.99	0.00810095	1378.98	0.0162019	1379	1.1749e-05	1.20515e-05
	5.24	0.999994	1979	0	1979	0	1979	0	0	8.58	1	1379.99	0.00810698	1379.98	0.016214	1380	1.17492e-05	1.20515e-05
	5.22	0.999994	1982	0	1982	0	1982	0	0	8.58	1	1380.99	0.008113	1380.98	0.016226	1381	1.17495e-05	1.20515e-05
	5.21	0.999994	1984	0	1984	0	1984	0	0	8.57	1	1381.99	0.00811903	1381.98	0.0162381	1382	1.17497e-05	1.20547e-05
	5.2	0.999994	1988	0	1988	0	1988	0	0	8.56	1	1382.99	0.00812506	1382.98	0.0162501	1383	1.17499e-05	1.20563e-05
	5.19	0.999994	1991	0	1991	0	1991	0	0	8.55	1	1383.99	0.00813109	1383.98	0.0162622	1384	1.17501e-05	1.20586e-05
	5.18	0.999993	1992	0	1992	0	1992	0	0	8.55	1	1384.99	0.00813712	1384.98	0.0162742	1385	1.17503e-05	1.20586e-05
	5.17	0.999993	1993	0	1993	0	1993	0	0	8.52	1	1385.99	0.00814315	1385.98	0.0162863	1386	1.17506e-05	1.20619e-05
	5.16	0.999993	1994	0	1994	0	1994	0	0	8.52	1	1386.99	0.00814918	1386.98	0.0162984	1387	1.17508e-05	1.20619e-05
	5.15	0.999993	1995	0	1995	0	1995	0	0	8.51	1	1387.99	0.00815521	1387.98	0.0163104	1388	1.1751e-05	1.20643e-05
	5.14	0.999993	1996	0	1996	0	1996	0	0	8.5	1	1388.99	0.00816124	1388.98	0.0163225	1389	1.17513e-05	1.20668e-05
	5.13	0.999993	1997	0	1997	0	1997	0	0	8.5	1	1389.99	0.00816728	1389.98	0.0163346	1390	1.17515e-05	1.20668e-05
	5.12	0.999992	1999	0	1999	0	1999	0	0	8.49	1	1390.99	0.00817331	1390.98	0.0163466	1391	1.17517e-05	1.20692e-05
	5.11	0.999992	2000	0	2000	0	2000	0	0	8.48	1	1391.99	0.00817935	1391.98	0.0163587	1392	1.17519e-05	1.20709e-05
	5.1	0.999992	2001	0	2001	0	2001	0	0	8.46	1	1392.99	0.00818538	1392.98	0.0163708	1393	1.17522e-05	1.20734e-05
	5.09	0.999992	2004	0	2004	0	2004	0	0	8.46	1	1393.99	0.00819142	1393.98	0.0163828	1394	1.17524e-05	1.20734e-05
	5.08	0.999992	2008	0	2008	0	2008	0	0	8.45	1	1394.99	0.00819746	1394.98	0.0163949	1395	1.17526e-05	1.20767e-05
	5.07	0.999991	2010	0	2010	0	2010	0	0	8.45	1	1395.99	0.0082035	1395.98	0.016407	1396	1.17529e-05	1.20767e-05
	5.06	0.999991	2013	0	2013	0	2013	0	0	8.44	1	1396.99	0.00820954	1396.98	0.0164191	1397	1.17531e-05	1.20793e-05
	5.05	0.999991	2014	0	2014	0	2014	0	0	8.43	1	1397.99	0.00821558	1397.98	0.0164312	1398	1.17533e-05	1.2081e-05
	5.04	0.999991	2016	0	2016	0	2016	0	0	8.42	1	1398.99	0.00822162	1398.98	0.0164432	1399	1.17536e-05	1.20844e-05
	5.02	0.99999	2017	0	2017	0	2017	0	0	8.42	1	1399.99	0.00822766	1399.98	0.0164553	1400	1.17538e-05	1.20844e-05
	5.01	0.99999	2021	0	2021	0	2021	0	0	8.42	1	1400.99	0.00823371	1400.98	0.0164674	1401	1.1754e-05	1.20844e-05
	5	0.99999	2023	0	2023	0	2023	0	0	8.41	1	1401.99	0.00823975	1401.98	0.0164795	1402	1.17543e-05	1.20888e-05
	4.99	0.99999	2025	0	2025	0	2025	0	0	8.41	1	1402.99	0.00824579	1402.98	0.0164916	1403	1.17545e-05	1.20888e-05
	4.98	0.99999	2029	0	2029	0	2029	0	0	8.38	1	1403.99	0.00825184	1403.98	0.0165037	1404	1.17548e-05	1.20914e-05
	4.97	0.999989	2032	0	2032	0	2032	0	0	8.37	1	1404.99	0.00825789	1404.98	0.0165158	1405	1.1755e-05	1.20932e-05
	4.96	0.999989	2034	0	2034	0	2034	0	0	8.35	1	1405.99	0.00826393	1405.98	0.0165279	1406	1.17552e-05	1.20949e-05
	4.95	0.999989	2037	0	2037	0	2037	0	0	8.33	1	1406.99	0.00826998	1406.98	0.01654	1407	1.17555e-05	1.20967e-05
	4.94	0.999989	2038	0	2038	0	2038	0	0	8.32	1	1407.99	0.00827603	1407.98	0.0165521	1408	1.17557e-05	1.20985e-05
	4.93	0.999988	2041	0	2041	0	2041	0	0	8.3	1	1408.99	0.00828208	1408.98	0.0165642	1409	1.1756e-05	1.21003e-05
	4.92	0.999988	2042	0	2042	0	2042	0	0	8.28	1	1409.99	0.00828813	1409.98	0.0165763	1410	1.17562e-05	1.21021e-05
	4.9	0.999987	2043	0	2043	0	2043	0	0	8.27	1	1410.99	0.00829418	1410.98	0.0165884	1411	1.17565e-05	1.21039e-05
	4.89	0.999987	2049	0	2049	0	2049	0	0	8.26	1	1411.99	0.00830024	1411.98	0.0166005	1412	1.17567e-05	1.21058e-05
	4.88	0.999987	2052	0	2052	0	2052	0	0	8.25	1	1412.99	0.00830629	1412.98	0.0166126	1413	1.1757e-05	1.21104e-05
	4.87	0.999987	2053	0	2053	0	2053	0	0	8.25	1	1413.99	0.00831235	1413.98	0.0166247	1414	1.17572e-05	1.21104e-05
	4.86	0.999986	2057	0	2057	0	2057	0	0	8.25	1	1414.99	0.0083184	1414.98	0.0166368	1415	1.17575e-05	1.21104e-05
	4.85	0.999986	2060	0	2060	0	2060	0	0	8.25	1	1415.99	0.00832446	1415.98	0.0166489	1416	1.17577e-05	1.21104e-05
	4.84	0.999986	2061	0	2061	0	2061	0	0	8.24	1	1416.99	0.00833052	1416.98	0.016661	1417	1.1758e-05	1.21169e-05
	4.83	0.999985	2064	0	2064	0	2064	0	0	8.24	1	1417.99	0.00833657	1417.98	0.0166731	1418	1.17582e-05	1.21169e-05
	4.82	0.999985	2065	0	2065	0	2065	0	0	8.24	1	1418.99	0.00834263	1418.98	0.0166853	1419	1.17585e-05	1.21169e-05
	4.81	0.999985	2068	0	2068	0	2068	0	0	8.23	1	1419.99	0.00834869	1419.98	0.0166974	1420	1.17587e-05	1.21216e-05
	4.8	0.999984	2071	0	2071	0	2071	0	0	8.23	1	1420.99	0.00835476	1420.98	0.0167095	1421	1.1759e-05	1.21216e-05
	4.79	0.999984	2075	0	2075	0	2075	0	0	8.22	1	1421.99	0.00836082	1421.98	0.0167216	1422	1.17592e-05	1.21245e-05
	4.78	0.999983	2078	0	2078	0	2078	0	0	8.21	1	1422.99	0.00836688	1422.98	0.0167338	1423	1.17595e-05	1.21274e-05
	4.77	0.999983	2083	0	2083	0	2083	0	0	8.21	1	1423.99	0.00837294	1423.98	0.0167459	1424	1.17598e-05	1.21274e-05
	4.76	0.999983	2086	0	2086	0	2086	0	0	8.2	1	1424.99	0.00837901	1424.98	0.016758	1425	1.176e-05	1.21323e-05
	4.74	0.999982	2088	0	2088	0	2088	0	0	8.2	1	1425.99	0.00838508	1425.98	0.0167702	1426	1.17603e-05	1.21323e-05
	4.73	0.999981	2092	0	2092	0	2092	0	0	8.2	1	1426.99	0.00839114	1426.98	0.0167823	1427	1.17605e-05	1.21323e-05
	4.72	0.999981	2094	0	2094	0	2094	0	0	8.19	1	1427.99	0.00839721	1427.98	0.0167944	1428	1.17608e-05	1.21382e-05
	4.71	0.999981	2095	0	2095	0	2095	0	0	8.19	1	1428.99	0.00840328	1428.98	0.0168066	1429	1.17611e-05	1.21382e-05
	4.7	0.99998	2098	0	2098	0	2098	0	0	8.19	1	1429.99	0.00840935	1429.98	0.0168187	1430	1.17613e-05	1.21382e-05
	4.68	0.999979	2101	0	2101	0	2101	0	0	8.18	1	1430.99	0.00841542	1430.98	0.0168308	1431	1.17616e-05	1.21452e-05
	4.67	0.999979	2106	0	2106	0	2106	0	0	8.18	1	1431.99	0.00842149	1431.98	0.016843	1432	1.17619e-05	1.21452e-05
	4.66	0.999978	2109	0	2109	0	2109	0	0	8.18	1	1432.99	0.00842757	1432.98	0.0168551	1433	1.17621e-05	1.21452e-05
	4.65	0.999978	2111	0	2111	0	2111	0	0	8.18	1	1433.99	0.00843364	1433.98	0.0168673	1434	1.17624e-05	1.21452e-05
	4.64	0.999977	2113	0	2113	0	2113	0	0	8.17	1	1434.99	0.00843972	1434.98	0.0168794	1435	1.17627e-05	1.21503e-05
	4.62	0.999976	2115	0	2115	0	2115	0	0	8.16	1	1435.99	0.00844579	1435.98	0.0168916	1436	1.17629e-05	1.21534e-05
	4.61	0.999975	2117	0	2117	0	2117	0	0	8.16	1	1436.99	0.00845187	1436.98	0.0169037	1437	1.17632e-05	1.21534e-05
	4.6	0.999975	2118	0	2118	0	2118	0	0	8.15	1	1437.99	0.00845795	1437.98	0.0169159	1438	1.17635e-05	1.21565e-05
	4.59	0.999974	2120	0	2120	0	2120	0	0	8.14	1	1438.99	0.00846403	1438.98	0.0169281	1439	1.17638e-05	1.21617e-05
	4.58	0.999974	2123	0	2123	0	2123	0	0	8.14	1	1439.99	0.00847011	1439.98	0.0169402	1440	1.1764e-05	1.21617e-05
	4.57	0.999973	2125	0	2125	0	2125	0	0	8.14	1	1440.99	0.00847619	1440.98	0.0169524	1441	1.17643e-05	1.21617e-05
	4.55	0.999972	2128	0	2128	0	2128	0	0	8.14	1	1441.99	0.00848227	1441.98	0.0169645	1442	1.17646e-05	1.21617e-05
	4.54	0.999971	2130	0	2130	0	2130	0	0	8.12	1	1442.99	0.00848835	1442.98	0.0169767	1443	1.17649e-05	1.21681e-05
	4.53	0.99997	2133	0	2133	0	2133	0	0	8.12	1	1443.99	0.00849444	1443.98	0.0169889	1444	1.17652e-05	1.21681e-05
	4.52	0.99997	2135	0	2135	0	2135	0	0	8.11	1	1444.99	0.00850052	1444.98	0.017001	1445	1.17654e-05	1.21767e-05
	4.51	0.999969	2138	0	2138	0	2138	0	0	8.11	1	1445.99	0.00850661	1445.98	0.0170132	1446	1.17657e-05	1.21767e-05
	4.5	0.999968	2140	0	2140	0	2140	0	0	8.11	1	1446.99	0.0085127	1446.98	0.0170254	1447	1.1766e-05	1.21767e-05
	4.49	0.999968	2143	0	2143	0	2143	0	0	8.11	1	1447.99	0.00851879	1447.98	0.0170376	1448	1.17663e-05	1.21767e-05
	4.48	0.999967	2144	0	2144	0	2144	0	0	8.11	1	1448.99	0.00852488	1448.98	0.0170498	1449	1.17666e-05	1.21767e-05
	4.47	0.999966	2146	0	2146	0	2146	0	0	8.11	1	1449.99	0.00853097	1449.98	0.0170619	1450	1.17669e-05	1.21767e-05
	4.45	0.999965	2149	0	2149	0	2149	0	0	8.1	1	1450.99	0.00853706	1450.98	0.0170741	1451	1.17671e-05	1.21844e-05
	4.44	0.999964	2153	0	2153	0	2153	0	0	8.09	1	1451.99	0.00854315	1451.98	0.0170863	1452	1.17674e-05	1.21888e-05
	4.43	0.999963	2154	0	2154	0	2154	0	0	8.09	1	1452.99	0.00854925	1452.98	0.0170985	1453	1.17677e-05	1.21888e-05
	4.42	0.999962	2156	0	2156	0	2156	0	0	8.09	1	1453.99	0.00855534	1453.98	0.0171107	1454	1.1768e-05	1.21888e-05
	4.41	0.999961	2159	0	2159	0	2159	0	0	8.07	1	1454.99	0.00856144	1454.98	0.0171229	1455	1.17683e-05	1.21967e-05
	4.4	0.99996	2162	0	2162	0	2162	0	0	8.07	1	1455.99	0.00856754	1455.98	0.0171351	1456	1.17686e-05	1.21967e-05
	4.39	0.999959	2164	0	2164	0	2164	0	0	8.07	1	1456.99	0.00857364	1456.98	0.0171473	1457	1.17689e-05	1.21967e-05
	4.38	0.999958	2167	0	2167	0	2167	0	0	8.07	1	1457.99	0.00857974	1457.98	0.0171595	1458	1.17692e-05	1.21967e-05
	4.37	0.999957	2168	0	2168	0	2168	0	0	8.06	1	1458.99	0.00858584	1458.98	0.0171717	1459	1.17695e-05	1.22025e-05
	4.36	0.999956	2170	0	2170	0	2170	0	0	8.05	1	1459.99	0.00859194	1459.98	0.0171839	1460	1.17698e-05	1.22059e-05
	4.35	0.999955	2171	0	2171	0	2171	0	0	8.05	1	1460.99	0.00859805	1460.98	0.0171961	1461	1.17701e-05	1.22059e-05
	4.34	0.999954	2179	0	2179	0	2179	0	0	8.04	1	1461.99	0.00860415	1461.98	0.0172083	1462	1.17704e-05	1.22094e-05
	4.33	0.999953	2183	0	2183	0	2183	0	0	8.03	1	1462.99	0.00861026	1462.98	0.0172205	1463	1.17707e-05	1.22129e-05
	4.32	0.999952	2186	0	2186	0	2186	0	0	8.03	1	1463.99	0.00861636	1463.98	0.0172327	1464	1.1771e-05	1.22129e-05
	4.31	0.999951	2190	0	2190	0	2190	0	0	8.02	1	1464.99	0.00862247	1464.98	0.0172449	1465	1.17713e-05	1.22165e-05
	4.3	0.99995	2192	0	2192	0	2192	0	0	8.01	1	1465.99	0.00862858	1465.98	0.0172572	1466	1.17716e-05	1.22201e-05
	4.29	0.999949	2195	0	2195	0	2195	0	0	8.01	1	1466.99	0.00863469	1466.98	0.0172694	1467	1.17719e-05	1.22201e-05
	4.27	0.999946	2198	0	2198	0	2198	0	0	8	1	1467.99	0.0086408	1467.98	0.0172816	1468	1.17722e-05	1.22249e-05
	4.26	0.999945	2202	0	2202	0	2202	0	0	8	1	1468.99	0.00864692	1468.98	0.0172938	1469	1.17725e-05	1.22249e-05
	4.24	0.999942	2204	0	2204	0	2204	0	0	7.99	1	1469.99	0.00865303	1469.98	0.0173061	1470	1.17728e-05	1.22285e-05
	4.23	0.999941	2206	0	2206	0	2206	0	0	7.97	1	1470.99	0.00865915	1470.98	0.0173183	1471	1.17731e-05	1.22358e-05
	4.21	0.999938	2208	0	2208	0	2208	0	0	7.97	1	1471.99	0.00866526	1471.98	0.0173305	1472	1.17735e-05	1.22358e-05
	4.2	0.999937	2213	0	2213	0	2213	0	0	7.97	1	1472.99	0.00867138	1472.98	0.0173428	1473	1.17738e-05	1.22358e-05
	4.19	0.999935	2218	0	2218	0	2218	0	0	7.97	1	1473.99	0.0086775	1473.98	0.017355	1474	1.17741e-05	1.22358e-05
	4.18	0.999934	2221	0	2221	0	2221	0	0	7.97	1	1474.99	0.00868362	1474.98	0.0173672	1475	1.17744e-05	1.22358e-05
	4.17	0.999932	2223	0	2223	0	2223	0	0	7.96	1	1475.99	0.00868974	1475.98	0.0173795	1476	1.17747e-05	1.22433e-05
	4.16	0.999931	2226	0	2226	0	2226	0	0	7.95	1	1476.99	0.00869586	1476.98	0.0173917	1477	1.1775e-05	1.22471e-05
	4.15	0.999929	2230	0	2230	0	2230	0	0	7.95	1	1477.99	0.00870199	1477.98	0.017404	1478	1.17754e-05	1.22471e-05
	4.14	0.999928	2232	0	2232	0	2232	0	0	7.93	1	1478.99	0.00870811	1478.98	0.0174162	1479	1.17757e-05	1.22509e-05
	4.13	0.999926	2238	0	2238	0	2238	0	0	7.92	1	1479.99	0.00871424	1479.98	0.0174285	1480	1.1776e-05	1.22534e-05
	4.12	0.999924	2246	0	2246	0	2246	0	0	7.9	1	1480.99	0.00872037	1480.98	0.0174407	1481	1.17763e-05	1.22573e-05
	4.11	0.999922	2250	0	2250	0	2250	0	0	7.9	1	1481.99	0.0087265	1481.98	0.017453	1482	1.17767e-05	1.22573e-05
	4.1	0.999921	2255	0	2255	0	2255	0	0	7.89	1	1482.99	0.00873263	1482.98	0.0174653	1483	1.1777e-05	1.22611e-05
	4.09	0.999919	2260	0	2260	0	2260	0	0	7.88	1	1483.99	0.00873876	1483.98	0.0174775	1484	1.17773e-05	1.22664e-05
	4.08	0.999917	2268	0	2268	0	2268	0	0	7.88	1	1484.99	0.00874489	1484.98	0.0174898	1485	1.17776e-05	1.22664e-05
	4.07	0.999915	2279	0	2279	0	2279	0	0	7.88	1	1485.99	0.00875103	1485.98	0.0175021	1486	1.1778e-05	1.22664e-05
	4.06	0.999913	2282	0	2282	0	2282	0	0	7.87	1	1486.99	0.00875716	1486.98	0.0175143	1487	1.17783e-05	1.22716e-05
	4.05	0.999911	2286	0	2286	0	2286	0	0	7.86	1	1487.99	0.0087633	1487.98	0.0175266	1488	1.17786e-05	1.22756e-05
	4.04	0.999909	2294	0	2294	0	2294	0	0	7.86	1	1488.99	0.00876944	1488.98	0.0175389	1489	1.1779e-05	1.22756e-05
	4.03	0.999907	2304	0	2304	0	2304	0	0	7.85	1	1489.99	0.00877558	1489.98	0.0175512	1490	1.17793e-05	1.2285e-05
	4.02	0.999905	2314	0	2314	0	2314	0	0	7.85	1	1490.99	0.00878172	1490.98	0.0175634	1491	1.17796e-05	1.2285e-05
	4.01	0.999902	2325	0	2325	0	2325	0	0	7.85	1	1491.99	0.00878786	1491.98	0.0175757	1492	1.178e-05	1.2285e-05
	4	0.9999	2365	0	2365	0	2365	0	0	7.85	1	1492.99	0.00879401	1492.98	0.017588	1493	1.17803e-05	1.2285e-05
	3.99	0.999898	2366	0	2366	0	2366	0	0	7.85	1	1493.99	0.00880015	1493.98	0.0176003	1494	1.17807e-05	1.2285e-05
	3.98	0.999895	2368	0	2368	0	2368	0	0	7.84	1	1494.99	0.0088063	1494.98	0.0176126	1495	1.1781e-05	1.22932e-05
	3.97	0.999893	2376	0	2376	0	2376	0	0	7.83	1	1495.99	0.00881245	1495.98	0.0176249	1496	1.17813e-05	1.22973e-05
	3.96	0.99989	2381	0	2381	0	2381	0	0	7.83	1	1496.99	0.0088186	1496.98	0.0176372	1497	1.17817e-05	1.22973e-05
	3.95	0.999888	2382	0	2382	0	2382	0	0	7.8	1	1497.99	0.00882475	1497.98	0.0176495	1498	1.1782e-05	1.23043e-05
	3.94	0.999885	2383	0	2383	0	2383	0	0	7.8	1	1498.99	0.0088309	1498.98	0.0176618	1499	1.17824e-05	1.23043e-05
	3.93	0.999883	2385	0	2385	0	2385	0	0	7.8	1	1499.99	0.00883705	1499.98	0.0176741	1500	1.17827e-05	1.23043e-05
	3.92	0.99988	2387	0	2387	0	2387	0	0	7.78	1	1500.99	0.00884321	1500.98	0.0176864	1501	1.17831e-05	1.23114e-05
	3.91	0.999877	2390	0	2390	0	2390	0	0	7.78	1	1501.99	0.00884936	1501.98	0.0176987	1502	1.17834e-05	1.23114e-05
	3.89	0.999871	2394	0	2394	0	2394	0	0	7.77	1	1502.99	0.00885552	1502.98	0.017711	1503	1.17838e-05	1.232e-05
	3.88	0.999868	2396	0	2396	0	2396	0	0	7.77	1	1503.99	0.00886168	1503.98	0.0177234	1504	1.17842e-05	1.232e-05
	3.87	0.999865	2400	0	2400	0	2400	0	0	7.77	1	1504.99	0.00886784	1504.98	0.0177357	1505	1.17845e-05	1.232e-05
	3.86	0.999862	2402	0	2402	0	2402	0	0	7.77	1	1505.99	0.008874	1505.98	0.017748	1506	1.17849e-05	1.232e-05
	3.85	0.999859	2404	0	2404	0	2404	0	0	7.76	1	1506.99	0.00888017	1506.98	0.0177603	1507	1.17852e-05	1.23287e-05
	3.84	0.999855	2409	0	2409	0	2409	0	0	7.76	1	1507.99	0.00888633	1507.98	0.0177727	1508	1.17856e-05	1.23287e-05
	3.83	0.999852	2412	0	2412	0	2412	0	0	7.75	1	1508.99	0.0088925	1508.98	0.017785	1509	1.1786e-05	1.23331e-05
	3.82	0.999849	2418	0	2418	0	2418	0	0	7.74	1	1509.99	0.00889867	1509.98	0.0177973	1510	1.17863e-05	1.23361e-05
	3.81	0.999845	2421	0	2421	0	2421	0	0	7.73	1	1510.99	0.00890484	1510.98	0.0178097	1511	1.17867e-05	1.2342e-05
	3.8	0.999842	2422	0	2422	0	2422	0	0	7.73	1	1511.99	0.00891101	1511.98	0.017822	1512	1.1787e-05	1.2342e-05
	3.79	0.999838	2429	0	2429	0	2429	0	0	7.73	1	1512.99	0.00891718	1512.98	0.0178344	1513	1.17874e-05	1.2342e-05
	3.78	0.999834	2431	0	2431	0	2431	0	0	7.72	1	1513.99	0.00892335	1513.98	0.0178467	1514	1.17878e-05	1.2348e-05
	3.77	0.99983	2434	0	2434	0	2434	0	0	7.71	1	1514.99	0.00892953	1514.98	0.0178591	1515	1.17882e-05	1.23557e-05
	3.76	0.999826	2435	0	2435	0	2435	0	0	7.71	1	1515.99	0.00893571	1515.98	0.0178714	1516	1.17885e-05	1.23557e-05
	3.75	0.999822	2436	0	2436	0	2436	0	0	7.71	1	1516.99	0.00894189	1516.98	0.0178838	1517	1.17889e-05	1.23557e-05
	3.74	0.999818	2438	0	2438	0	2438	0	0	7.71	1	1517.99	0.00894807	1517.98	0.0178961	1518	1.17893e-05	1.23557e-05
	3.73	0.999814	2441	0	2441	0	2441	0	0	7.7	1	1518.99	0.00895425	1518.98	0.0179085	1519	1.17897e-05	1.23634e-05
	3.72	0.999809	2444	0	2444	0	2444	0	0	7.67	1	1519.99	0.00896043	1519.98	0.0179209	1520	1.179e-05	1.23665e-05
	3.71	0.999805	2449	0	2449	0	2449	0	0	7.66	1	1520.99	0.00896662	1520.98	0.0179332	1521	1.17904e-05	1.23696e-05
	3.7	0.9998	2455	0	2455	0	2455	0	0	7.65	1	1521.99	0.0089728	1521.98	0.0179456	1522	1.17908e-05	1.23791e-05
	3.69	0.999796	2459	0	2459	0	2459	0	0	7.65	1	1522.99	0.00897899	1522.98	0.017958	1523	1.17912e-05	1.23791e-05
	3.68	0.999791	2462	0	2462	0	2462	0	0	7.65	1	1523.99	0.00898518	1523.98	0.0179704	1524	1.17916e-05	1.23791e-05
	3.66	0.999781	2464	0	2464	0	2464	0	0	7.65	1	1524.99	0.00899137	1524.98	0.0179827	1525	1.1792e-05	1.23791e-05
	3.65	0.999776	2467	0	2467	0	2467	0	0	7.65	1	1525.99	0.00899756	1525.98	0.0179951	1526	1.17924e-05	1.23791e-05
	3.64	0.999771	2471	0	2471	0	2471	0	0	7.64	1	1526.99	0.00900376	1526.98	0.0180075	1527	1.17927e-05	1.23919e-05
	3.63	0.999766	2472	0	2472	0	2472	0	0	7.64	1	1527.99	0.00900995	1527.98	0.0180199	1528	1.17931e-05	1.23919e-05
	3.62	0.99976	2475	0	2475	0	2475	0	0	7.64	1	1528.99	0.00901615	1528.98	0.0180323	1529	1.17935e-05	1.23919e-05
	3.61	0.999755	2480	0	2480	0	2480	0	0	7.62	1	1529.99	0.00902235	1529.98	0.0180447	1530	1.17939e-05	1.23984e-05
	3.6	0.999749	2482	0	2482	0	2482	0	0	7.61	1	1530.99	0.00902855	1530.98	0.0180571	1531	1.17943e-05	1.24067e-05
	3.59	0.999743	2486	0	2486	0	2486	0	0	7.61	1	1531.99	0.00903475	1531.98	0.0180695	1532	1.17947e-05	1.24067e-05
	3.58	0.999737	2489	0	2489	0	2489	0	0	7.61	1	1532.99	0.00904096	1532.98	0.0180819	1533	1.17951e-05	1.24067e-05
	3.57	0.999731	2493	0	2493	0	2493	0	0	7.61	1	1533.99	0.00904716	1533.98	0.0180943	1534	1.17955e-05	1.24067e-05
	3.56	0.999725	2495	0	2495	0	2495	0	0	7.6	1	1534.99	0.00905337	1534.98	0.0181067	1535	1.17959e-05	1.24184e-05
	3.55	0.999718	2498	0	2498	0	2498	0	0	7.6	1	1535.99	0.00905958	1535.98	0.0181192	1536	1.17963e-05	1.24184e-05
	3.53	0.999705	2499	0	2499	0	2499	0	0	7.6	1	1536.99	0.00906579	1536.98	0.0181316	1537	1.17967e-05	1.24184e-05
	3.52	0.999698	2500	0	2500	0	2500	0	0	7.59	1	1537.99	0.009072	1537.98	0.018144	1538	1.17971e-05	1.24303e-05
	3.51	0.999691	2505	0	2505	0	2505	0	0	7.59	1	1538.99	0.00907822	1538.98	0.0181564	1539	1.17976e-05	1.24303e-05
	3.5	0.999684	2507	0	2507	0	2507	0	0	7.59	1	1539.99	0.00908443	1539.98	0.0181689	1540	1.1798e-05	1.24303e-05
	3.49	0.999676	2508	0	2508	0	2508	0	0	7.59	1	1540.99	0.00909065	1540.98	0.0181813	1541	1.17984e-05	1.24303e-05
	3.48	0.999669	2510	0	2510	0	2510	0	0	7.58	1	1541.99	0.00909687	1541.98	0.0181937	1542	1.17988e-05	1.24442e-05
	3.47	0.999661	2513	0	2513	0	2513	0	0	7.58	1	1542.99	0.00910309	1542.98	0.0182062	1543	1.17992e-05	1.24442e-05
	3.46	0.999653	2517	0	2517	0	2517	0	0	7.58	1	1543.99	0.00910932	1543.98	0.0182186	1544	1.17996e-05	1.24442e-05
	3.45	0.999645	2519	0	2519	0	2519	0	0	7.58	1	1544.99	0.00911554	1544.98	0.0182311	1545	1.18001e-05	1.24442e-05
	3.44	0.999637	2521	0	2521	0	2521	0	0	7.56	1	1545.99	0.00912177	1545.98	0.0182435	1546	1.18005e-05	1.2453e-05
	3.43	0.999628	2522	0	2522	0	2522	0	0	7.54	1	1546.99	0.00912799	1546.98	0.018256	1547	1.18009e-05	1.24583e-05
	3.42	0.99962	2524	0	2524	0	2524	0	0	7.54	1	1547.99	0.00913423	1547.98	0.0182685	1548	1.18013e-05	1.24583e-05
	3.4	0.999602	2526	0	2526	0	2526	0	0	7.53	1	1548.99	0.00914046	1548.98	0.0182809	1549	1.18018e-05	1.24637e-05
	3.39	0.999593	2527	0	2527	0	2527	0	0	7.52	1	1549.99	0.00914669	1549.98	0.0182934	1550	1.18022e-05	1.24673e-05
	3.38	0.999583	2533	0	2533	0	2533	0	0	7.49	1	1550.99	0.00915293	1550.98	0.0183059	1551	1.18026e-05	1.24728e-05
	3.37	0.999573	2535	0	2535	0	2535	0	0	7.49	1	1551.99	0.00915916	1551.98	0.0183183	1552	1.1803e-05	1.24728e-05
	3.36	0.999563	2540	0	2540	0	2540	0	0	7.48	1	1552.99	0.0091654	1552.98	0.0183308	1553	1.18035e-05	1.24783e-05
	3.35	0.999553	2542	0	2542	0	2542	0	0	7.46	1	1553.99	0.00917164	1553.98	0.0183433	1554	1.18039e-05	1.24857e-05
	3.34	0.999543	2543	0	2543	0	2543	0	0	7.46	1	1554.99	0.00917789	1554.98	0.0183558	1555	1.18044e-05	1.24857e-05
	3.33	0.999532	2546	0	2546	0	2546	0	0	7.46	1	1555.99	0.00918413	1555.98	0.0183683	1556	1.18048e-05	1.24857e-05
	3.32	0.999521	2550	0	2550	0	2550	0	0	7.45	1	1556.99	0.00919038	1556.98	0.0183808	1557	1.18052e-05	1.24969e-05
	3.31	0.99951	2553	0	2553	0	2553	0	0	7.45	1	1557.99	0.00919663	1557.98	0.0183933	1558	1.18057e-05	1.24969e-05
	3.3	0.999499	2555	0	2555	0	2555	0	0	7.45	1	1558.99	0.00920288	1558.98	0.0184058	1559	1.18061e-05	1.24969e-05
	3.29	0.999487	2556	0	2556	0	2556	0	0	7.44	1	1559.99	0.00920913	1559.98	0.0184183	1560	1.18066e-05	1.25083e-05
	3.28	0.999475	2561	0	2561	0	2561	0	0	7.44	1	1560.99	0.00921538	1560.98	0.0184308	1561	1.1807e-05	1.25083e-05
	3.27	0.999463	2563	0	2563	0	2563	0	0	7.44	1	1561.99	0.00922164	1561.98	0.0184433	1562	1.18075e-05	1.25083e-05
	3.26	0.99945	2566	0	2566	0	2566	0	0	7.43	1	1562.99	0.0092279	1562.98	0.0184558	1563	1.18079e-05	1.2516e-05
	3.25	0.999438	2569	0	2569	0	2569	0	0	7.42	1	1563.99	0.00923416	1563.98	0.0184683	1564	1.18084e-05	1.25257e-05
	3.24	0.999425	2570	0	2570	0	2570	0	0	7.42	1	1564.99	0.00924042	1564.98	0.0184808	1565	1.18088e-05	1.25257e-05
	3.23	0.999411	2574	0	2574	0	2574	0	0	7.42	1	1565.99	0.00924668	1565.98	0.0184934	1566	1.18093e-05	1.25257e-05
	3.22	0.999397	2577	0	2577	0	2577	0	0	7.42	1	1566.99	0.00925295	1566.98	0.0185059	1567	1.18098e-05	1.25257e-05
	3.21	0.999383	2580	0	2580	0	2580	0	0	7.41	1	1567.99	0.00925922	1567.98	0.0185184	1568	1.18102e-05	1.25356e-05
	3.2	0.999369	2583	0	2583	0	2583	0	0	7.4	1	1568.99	0.00926549	1568.98	0.018531	1569	1.18107e-05	1.25395e-05
	3.19	0.999354	2584	0	2584	0	2584	0	0	7.38	1	1569.99	0.00927176	1569.98	0.0185435	1570	1.18112e-05	1.25435e-05
	3.18	0.999339	2593	0	2593	0	2593	0	0	7.37	1	1570.99	0.00927803	1570.98	0.0185561	1571	1.18116e-05	1.25516e-05
	3.17	0.999324	2597	0	2597	0	2597	0	0	7.37	1	1571.99	0.00928431	1571.98	0.0185686	1572	1.18121e-05	1.25516e-05
	3.16	0.999308	2599	0	2599	0	2599	0	0	7.37	1	1572.99	0.00929059	1572.98	0.0185812	1573	1.18126e-05	1.25516e-05
	3.15	0.999292	2604	0	2604	0	2604	0	0	7.36	1	1573.99	0.00929686	1573.98	0.0185937	1574	1.1813e-05	1.25597e-05
	3.13	0.999259	2605	0	2605	0	2605	0	0	7.34	1	1574.99	0.00930315	1574.98	0.0186063	1575	1.18135e-05	1.25638e-05
	3.12	0.999241	2609	0	2609	0	2609	0	0	7.33	1	1575.99	0.00930943	1575.98	0.0186189	1576	1.1814e-05	1.25679e-05
	3.11	0.999224	2610	0	2610	0	2610	0	0	7.32	1	1576.99	0.00931572	1576.98	0.0186314	1577	1.18145e-05	1.25721e-05
	3.1	0.999206	2613	0	2613	0	2613	0	0	7.31	1	1577.99	0.009322	1577.98	0.018644	1578	1.1815e-05	1.25762e-05
	3.09	0.999187	2614	0	2614	0	2614	0	0	7.29	1	1578.99	0.0093283	1578.98	0.0186566	1579	1.18154e-05	1.25804e-05
	3.08	0.999168	2616	0	2616	0	2616	0	0	7.28	1	1579.99	0.00933459	1579.98	0.0186692	1580	1.18159e-05	1.25846e-05
	3.07	0.999149	2621	0	2621	0	2621	0	0	7.25	1	1580.99	0.00934088	1580.98	0.0186818	1581	1.18164e-05	1.25909e-05
	3.06	0.999129	2625	0	2625	0	2625	0	0	7.25	1	1581.99	0.00934718	1581.98	0.0186944	1582	1.18169e-05	1.25909e-05
	3.05	0.999109	2627	0	2627	0	2627	0	0	7.22	1	1582.99	0.00935348	1582.98	0.018707	1583	1.18174e-05	1.26038e-05
	3.04	0.999088	2628	0	2628	0	2628	0	0	7.22	1	1583.99	0.00935978	1583.98	0.0187196	1584	1.18179e-05	1.26038e-05
	3.03	0.999067	2629	0	2629	0	2629	0	0	7.22	1	1584.99	0.00936608	1584.98	0.0187322	1585	1.18184e-05	1.26038e-05
	3.02	0.999045	2631	0	2631	0	2631	0	0	7.22	1	1585.99	0.00937239	1585.98	0.0187448	1586	1.18189e-05	1.26038e-05
	3.01	0.999023	2636	0	2636	0	2636	0	0	7.21	1	1586.99	0.00937869	1586.98	0.0187574	1587	1.18194e-05	1.26146e-05
	3	0.999	2641	0	2641	0	2641	0	0	7.18	1	1587.99	0.009385	1587.98	0.01877	1588	1.18199e-05	1.2619e-05
	2.99	0.998977	2644	0	2644	0	2644	0	0	7.17	1	1588.99	0.00939131	1588.98	0.0187826	1589	1.18204e-05	1.26256e-05
	2.98	0.998953	2647	0	2647	0	2647	0	0	7.17	1	1589.99	0.00939763	1589.98	0.0187953	1590	1.18209e-05	1.26256e-05
	2.97	0.998928	2650	0	2650	0	2650	0	0	7.15	1	1590.99	0.00940394	1590.98	0.0188079	1591	1.18214e-05	1.26367e-05
	2.96	0.998904	2654	0	2654	0	2654	0	0	7.15	1	1591.99	0.00941026	1591.98	0.0188205	1592	1.18219e-05	1.26367e-05
	2.95	0.998878	2657	0	2657	0	2657	0	0	7.15	1	1592.99	0.00941658	1592.98	0.0188332	1593	1.18225e-05	1.26367e-05
	2.94	0.998852	2660	0	2660	0	2660	0	0	7.14	1	1593.99	0.00942291	1593.98	0.0188458	1594	1.1823e-05	1.26457e-05
	2.93	0.998825	2661	0	2661	0	2661	0	0	7.13	1	1594.99	0.00942923	1594.98	0.0188585	1595	1.18235e-05	1.26502e-05
	2.92	0.998798	2663	0	2663	0	2663	0	0	7.12	1	1595.99	0.00943556	1595.98	0.0188711	1596	1.1824e-05	1.26571e-05
	2.91	0.99877	2665	0	2665	0	2665	0	0	7.12	1	1596.99	0.00944189	1596.98	0.0188838	1597	1.18245e-05	1.26571e-05
	2.9	0.998741	2667	0	2667	0	2667	0	0	7.11	1	1597.99	0.00944822	1597.98	0.0188964	1598	1.18251e-05	1.26686e-05
	2.89	0.998712	2670	0	2670	0	2670	0	0	7.11	1	1598.99	0.00945455	1598.98	0.0189091	1599	1.18256e-05	1.26686e-05
	2.88	0.998682	2671	0	2671	0	2671	0	0	7.11	1	1599.99	0.00946089	1599.98	0.0189218	1600	1.18261e-05	1.26686e-05
	2.87	0.998651	2673	0	2673	0	2673	0	0	7.1	1	1600.99	0.00946723	1600.98	0.0189345	1601	1.18266e-05	1.26779e-05
	2.86	0.99862	2676	0	2676	0	2676	0	0	7.09	1	1601.99	0.00947357	1601.98	0.0189471	1602	1.18272e-05	1.2685e-05
	2.85	0.998587	2681	0	2681	0	2681	0	0	7.09	1	1602.99	0.00947992	1602.98	0.0189598	1603	1.18277e-05	1.2685e-05
	2.84	0.998555	2683	0	2683	0	2683	0	0	7.07	1	1603.99	0.00948626	1603.98	0.0189725	1604	1.18283e-05	1.26992e-05
	2.83	0.998521	2686	0	2686	0	2686	0	0	7.07	1	1604.99	0.00949261	1604.98	0.0189852	1605	1.18288e-05	1.26992e-05
	2.82	0.998486	2690	0	2690	0	2690	0	0	7.07	1	1605.99	0.00949896	1605.98	0.0189979	1606	1.18293e-05	1.26992e-05
	2.81	0.998451	2695	0	2695	0	2695	0	0	7.07	1	1606.99	0.00950531	1606.98	0.0190106	1607	1.18299e-05	1.26992e-05
	2.8	0.998415	2698	0	2698	0	2698	0	0	7.06	1	1607.99	0.00951167	1607.98	0.0190233	1608	1.18304e-05	1.27137e-05
	2.79	0.998378	2703	0	2703	0	2703	0	0	7.06	1	1608.99	0.00951803	1608.98	0.0190361	1609	1.1831e-05	1.27137e-05
	2.78	0.99834	2706	0	2706	0	2706	0	0	7.05	1	1609.99	0.00952439	1609.98	0.0190488	1610	1.18315e-05	1.27259e-05
	2.77	0.998302	2712	0	2712	0	2712	0	0	7.05	1	1610.99	0.00953075	1610.98	0.0190615	1611	1.18321e-05	1.27259e-05
	2.76	0.998262	2715	0	2715	0	2715	0	0	7.05	1	1611.99	0.00953712	1611.98	0.0190742	1612	1.18327e-05	1.27259e-05
	2.75	0.998222	2719	0	2719	0	2719	0	0	7.04	1	1612.99	0.00954348	1612.98	0.019087	1613	1.18332e-05	1.27408e-05
	2.74	0.99818	2722	0	2722	0	2722	0	0	7.04	1	1613.99	0.00954985	1613.98	0.0190997	1614	1.18338e-05	1.27408e-05
	2.73	0.998138	2726	0	2726	0	2726	0	0	7.04	1	1614.99	0.00955623	1614.98	0.0191125	1615	1.18343e-05	1.27408e-05
	2.72	0.998095	2728	0	2728	0	2728	0	0	7.03	1	1615.99	0.0095626	1615.98	0.0191252	1616	1.18349e-05	1.27534e-05
	2.71	0.99805	2730	0	2730	0	2730	0	0	7.03	1	1616.99	0.00956898	1616.98	0.019138	1617	1.18355e-05	1.27534e-05
	2.7	0.998005	2736	0	2736	0	2736	0	0	7.02	1	1617.99	0.00957536	1617.98	0.0191507	1618	1.1836e-05	1.27687e-05
	2.69	0.997958	2743	0	2743	0	2743	0	0	7.02	1	1618.99	0.00958174	1618.98	0.0191635	1619	1.18366e-05	1.27687e-05
	2.68	0.997911	2746	0	2746	0	2746	0	0	7.02	1	1619.99	0.00958813	1619.98	0.0191763	1620	1.18372e-05	1.27687e-05
	2.67	0.997862	2749	0	2749	0	2749	0	0	7.02	1	1620.99	0.00959452	1620.98	0.019189	1621	1.18378e-05	1.27687e-05
	2.65	0.997761	2754	0	2754	0	2754	0	0	7	1	1621.99	0.00960091	1621.98	0.0192018	1622	1.18384e-05	1.27817e-05
	2.64	0.997709	2759	0	2759	0	2759	0	0	6.99	1	1622.99	0.0096073	1622.98	0.0192146	1623	1.18389e-05	1.27921e-05
	2.63	0.997656	2762	0	2762	0	2762	0	0	6.99	1	1623.99	0.0096137	1623.98	0.0192274	1624	1.18395e-05	1.27921e-05
	2.62	0.997601	2764	0	2764	0	2764	0	0	6.99	1	1624.99	0.0096201	1624.98	0.0192402	1625	1.18401e-05	1.27921e-05
	2.61	0.997545	2768	0	2768	0	2768	0	0	6.98	1	1625.99	0.0096265	1625.98	0.019253	1626	1.18407e-05	1.28081e-05
	2.6	0.997488	2770	0	2770	0	2770	0	0	6.98	1	1626.99	0.0096329	1626.98	0.0192658	1627	1.18413e-05	1.28081e-05
	2.59	0.99743	2773	0	2773	0	2773	0	0	6.98	1	1627.99	0.00963931	1627.98	0.0192786	1628	1.18419e-05	1.28081e-05
	2.58	0.99737	2776	0	2776	0	2776	0	0	6.97	1	1628.99	0.00964572	1628.98	0.0192914	1629	1.18425e-05	1.28188e-05
	2.57	0.997308	2779	0	2779	0	2779	0	0	6.96	1	1629.99	0.00965213	1629.98	0.0193043	1630	1.18431e-05	1.28242e-05
	2.56	0.997246	2784	0	2784	0	2784	0	0	6.95	1	1630.99	0.00965855	1630.98	0.0193171	1631	1.18437e-05	1.28324e-05
	2.55	0.997182	2786	0	2786	0	2786	0	0	6.95	1	1631.99	0.00966496	1631.98	0.0193299	1632	1.18443e-05	1.28324e-05
	2.54	0.997116	2791	0	2791	0	2791	0	0	6.94	1	1632.99	0.00967138	1632.98	0.0193428	1633	1.18449e-05	1.28489e-05
	2.53	0.997049	2794	0	2794	0	2794	0	0	6.94	1	1633.99	0.00967781	1633.98	0.0193556	1634	1.18455e-05	1.28489e-05
	2.52	0.99698	2795	0	2795	0	2795	0	0	6.94	1	1634.99	0.00968423	1634.98	0.0193685	1635	1.18462e-05	1.28489e-05
	2.51	0.99691	2800	0	2800	0	2800	0	0	6.94	1	1635.99	0.00969066	1635.98	0.0193813	1636	1.18468e-05	1.28489e-05
	2.5	0.996838	2806	0	2806	0	2806	0	0	6.93	1	1636.99	0.00969709	1636.98	0.0193942	1637	1.18474e-05	1.28657e-05
	2.49	0.996764	2810	0	2810	0	2810	0	0	6.93	1	1637.99	0.00970353	1637.98	0.0194071	1638	1.1848e-05	1.28657e-05
	2.48	0.996689	2813	0	2813	0	2813	0	0	6.92	1	1638.99	0.00970996	1638.98	0.0194199	1639	1.18486e-05	1.28742e-05
	2.47	0.996612	2817	0	2817	0	2817	0	0	6.9	1	1639.99	0.0097164	1639.98	0.0194328	1640	1.18493e-05	1.28913e-05
	2.46	0.996533	2819	0	2819	0	2819	0	0	6.9	1	1640.99	0.00972285	1640.98	0.0194457	1641	1.18499e-05	1.28913e-05
	2.45	0.996452	2822	0	2822	0	2822	0	0	6.9	1	1641.99	0.00972929	1641.98	0.0194586	1642	1.18505e-05	1.28913e-05
	2.44	0.996369	2823	0	2823	0	2823	0	0	6.9	1	1642.99	0.00973574	1642.98	0.0194715	1643	1.18512e-05	1.28913e-05
	2.43	0.996285	2824	0	2824	0	2824	0	0	6.9	1	1643.99	0.00974219	1643.98	0.0194844	1644	1.18518e-05	1.28913e-05
	2.42	0.996198	2831	0	2831	0	2831	0	0	6.89	1	1644.99	0.00974865	1644.98	0.0194973	1645	1.18525e-05	1.29088e-05
	2.41	0.99611	2835	0	2835	0	2835	0	0	6.88	1	1645.99	0.0097551	1645.98	0.0195102	1646	1.18531e-05	1.29176e-05
	2.4	0.996019	2840	0	2840	0	2840	0	0	6.88	1	1646.99	0.00976156	1646.98	0.0195231	1647	1.18538e-05	1.29176e-05
	2.39	0.995926	2845	0	2845	0	2845	0	0	6.87	1	1647.99	0.00976803	1647.98	0.0195361	1648	1.18544e-05	1.29265e-05
	2.38	0.995831	2853	0	2853	0	2853	0	0	6.86	1	1648.99	0.00977449	1648.98	0.019549	1649	1.18551e-05	1.29324e-05
	2.37	0.995734	2860	0	2860	0	2860	0	0	6.85	1	1649.99	0.00978096	1649.98	0.0195619	1650	1.18557e-05	1.29414e-05
	2.36	0.995635	2864	0	2864	0	2864	0	0	6.85	1	1650.99	0.00978744	1650.98	0.0195749	1651	1.18564e-05	1.29414e-05
	2.35	0.995533	2870	0	2870	0	2870	0	0	6.83	1	1651.99	0.00979391	1651.98	0.0195878	1652	1.1857e-05	1.29505e-05
	2.34	0.995429	2876	0	2876	0	2876	0	0	6.82	1	1652.99	0.00980039	1652.98	0.0196008	1653	1.18577e-05	1.29566e-05
	2.33	0.995323	2880	0	2880	0	2880	0	0	6.81	1	1653.99	0.00980687	1653.98	0.0196137	1654	1.18584e-05	1.29627e-05
	2.32	0.995214	2882	0	2882	0	2882	0	0	6.8	1	1654.99	0.00981335	1654.98	0.0196267	1655	1.1859e-05	1.29719e-05
	2.31	0.995102	2888	0	2888	0	2888	0	0	6.8	1	1655.99	0.00981984	1655.98	0.0196397	1656	1.18597e-05	1.29719e-05
	2.3	0.994988	2891	0	2891	0	2891	0	0	6.79	1	1656.99	0.00982633	1656.98	0.0196527	1657	1.18604e-05	1.29812e-05
	2.29	0.994871	2903	0	2903	0	2903	0	0	6.78	1	1657.99	0.00983283	1657.98	0.0196657	1658	1.18611e-05	1.30001e-05
	2.28	0.994752	2905	0	2905	0	2905	0	0	6.78	1	1658.99	0.00983932	1658.98	0.0196786	1659	1.18618e-05	1.30001e-05
	2.27	0.99463	2907	0	2907	0	2907	0	0	6.78	1	1659.99	0.00984582	1659.98	0.0196916	1660	1.18624e-05	1.30001e-05
	2.26	0.994505	2910	0	2910	0	2910	0	0	6.78	1	1660.99	0.00985233	1660.98	0.0197047	1661	1.18631e-05	1.30001e-05
	2.25	0.994377	2913	0	2913	0	2913	0	0	6.78	1	1661.99	0.00985883	1661.98	0.0197177	1662	1.18638e-05	1.30001e-05
	2.24	0.994246	2918	0	2918	0	2918	0	0	6.77	1	1662.99	0.00986534	1662.98	0.0197307	1663	1.18645e-05	1.30224e-05
	2.23	0.994112	2922	0	2922	0	2922	0	0	6.77	1	1663.99	0.00987186	1663.98	0.0197437	1664	1.18652e-05	1.30224e-05
	2.22	0.993974	2928	0	2928	0	2928	0	0	6.76	1	1664.99	0.00987837	1664.98	0.0197567	1665	1.18659e-05	1.30451e-05
	2.21	0.993834	2931	0	2931	0	2931	0	0	6.76	1	1665.99	0.00988489	1665.98	0.0197698	1666	1.18666e-05	1.30451e-05
	2.2	0.99369	2937	0	2937	0	2937	0	0	6.76	1	1666.99	0.00989141	1666.98	0.0197828	1667	1.18673e-05	1.30451e-05
	2.19	0.993543	2945	0	2945	0	2945	0	0	6.76	1	1667.99	0.00989794	1667.98	0.0197959	1668	1.1868e-05	1.30451e-05
	2.18	0.993393	2951	0	2951	0	2951	0	0	6.76	1	1668.99	0.00990447	1668.98	0.0198089	1669	1.18687e-05	1.30451e-05
	2.17	0.993239	2959	0	2959	0	2959	0	0	6.75	1	1669.99	0.009911	1669.98	0.019822	1670	1.18695e-05	1.30682e-05
	2.16	0.993082	2963	0	2963	0	2963	0	0	6.75	1	1670.99	0.00991754	1670.98	0.0198351	1671	1.18702e-05	1.30682e-05
	2.15	0.992921	2968	0	2968	0	2968	0	0	6.74	1	1671.99	0.00992408	1671.98	0.0198482	1672	1.18709e-05	1.30918e-05
	2.14	0.992756	2975	0	2975	0	2975	0	0	6.74	1	1672.99	0.00993062	1672.98	0.0198612	1673	1.18716e-05	1.30918e-05
	2.13	0.992587	2978	0	2978	0	2978	0	0	6.74	1	1673.99	0.00993716	1673.98	0.0198743	1674	1.18724e-05	1.30918e-05
	2.12	0.992414	2989	0	2989	0	2989	0	0	6.74	1	1674.99	0.00994371	1674.98	0.0198874	1675	1.18731e-05	1.30918e-05
	2.11	0.992238	2992	0	2992	0	2992	0	0	6.74	1	1675.99	0.00995027	1675.98	0.0199005	1676	1.18738e-05	1.30918e-05
	2.1	0.992057	3001	0	3001	0	3001	0	0	6.73	1	1676.99	0.00995682	1676.98	0.0199136	1677	1.18746e-05	1.31123e-05
	2.09	0.991872	3008	0	3008	0	3008	0	0	6.72	1	1677.99	0.00996338	1677.98	0.0199268	1678	1.18753e-05	1.31297e-05
	2.08	0.991682	3026	0	3026	0	3026	0	0	6.72	1	1678.99	0.00996995	1678.98	0.0199399	1679	1.18761e-05	1.31297e-05
	2.07	0.991489	3034	0	3034	0	3034	0	0	6.72	1	1679.99	0.00997651	1679.98	0.019953	1680	1.18768e-05	1.31297e-05
	2.06	0.99129	3044	0	3044	0	3044	0	0	6.72	1	1680.99	0.00998308	1680.98	0.0199662	1681	1.18776e-05	1.31297e-05
	2.05	0.991087	3057	0	3057	0	3057	0	0	6.71	1	1681.99	0.00998966	1681.98	0.0199793	1682	1.18783e-05	1.31579e-05
	2.04	0.99088	3066	0	3066	0	3066	0	0	6.71	1	1682.99	0.00999623	1682.98	0.0199925	1683	1.18791e-05	1.31579e-05
	2.03	0.990667	3096	0	3096	0	3096	0	0	6.71	1	1683.99	0.0100028	1683.98	0.0200056	1684	1.18798e-05	1.31579e-05
	2.02	0.99045	3139	0	3139	0	3139	0	0	6.71	1	1684.99	0.0100094	1684.98	0.0200188	1685	1.18806e-05	1.31579e-05
	2.01	0.990228	3195	0	3195	0	3195	0	0	6.7	1	1685.99	0.010016	1685.98	0.020032	1686	1.18814e-05	1.31867e-05
	2	0.99	3370	0	3370	0	3370	0	0	6.7	1	1686.99	0.0100226	1686.98	0.0200452	1687	1.18821e-05	1.31867e-05
	1.96	0.989035	3376	0	3376	0	3376	0	0	6.7	1	1687.99	0.0100292	1687.98	0.0200583	1688	1.18829e-05	1.31867e-05
	1.95	0.98878	3379	0	3379	0	3379	0	0	6.7	1	1688.99	0.0100358	1688.98	0.0200715	1689	1.18837e-05	1.31867e-05
	1.93	0.988251	3386	0	3386	0	3386	0	0	6.69	1	1689.99	0.0100424	1689.98	0.0200847	1690	1.18845e-05	1.3205e-05
	1.92	0.987977	3392	0	3392	0	3392	0	0	6.68	1	1690.99	0.010049	1690.98	0.020098	1691	1.18853e-05	1.32124e-05
	1.91	0.987697	3394	0	3394	0	3394	0	0	6.67	1	1691.99	0.0100556	1691.98	0.0201112	1692	1.1886e-05	1.32236e-05
	1.9	0.987411	3397	0	3397	0	3397	0	0	6.67	1	1692.99	0.0100622	1692.98	0.0201244	1693	1.18868e-05	1.32236e-05
	1.89	0.987118	3403	0	3403	0	3403	0	0	6.64	1	1693.99	0.0100688	1693.98	0.0201376	1694	1.18876e-05	1.32386e-05
	1.88	0.986817	3405	0	3405	0	3405	0	0	6.64	1	1694.99	0.0100754	1694.98	0.0201509	1695	1.18884e-05	1.32386e-05
	1.87	0.98651	3408	0	3408	0	3408	0	0	6.63	1	1695.99	0.0100821	1695.98	0.0201641	1696	1.18892e-05	1.32576e-05
	1.85	0.985875	3412	0	3412	0	3412	0	0	6.63	1	1696.99	0.0100887	1696.98	0.0201774	1697	1.189e-05	1.32576e-05
	1.84	0.985546	3413	0	3413	0	3413	0	0	6.63	1	1697.99	0.0100953	1697.98	0.0201907	1698	1.18908e-05	1.32576e-05
	1.83	0.985209	3416	0	3416	0	3416	0	0	6.6	1	1698.99	0.010102	1698.98	0.0202039	1699	1.18917e-05	1.32729e-05
	1.82	0.984864	3420	0	3420	0	3420	0	0	6.59	1	1699.99	0.0101086	1699.98	0.0202172	1700	1.18925e-05	1.32845e-05
	1.81	0.984512	3423	0	3423	0	3423	0	0	6.59	1	1700.99	0.0101152	1700.98	0.0202305	1701	1.18933e-05	1.32845e-05
	1.8	0.984151	3425	0	3425	0	3425	0	0	6.58	1	1701.99	0.0101219	1701.98	0.0202438	1702	1.18941e-05	1.32963e-05
	1.79	0.983782	3426	0	3426	0	3426	0	0	6.57	1	1702.99	0.0101285	1702.98	0.0202571	1703	1.18949e-05	1.33081e-05
	1.78	0.983404	3429	0	3429	0	3429	0	0	6.57	1	1703.99	0.0101352	1703.98	0.0202704	1704	1.18958e-05	1.33081e-05
	1.77	0.983018	3432	0	3432	0	3432	0	0	6.56	1	1704.99	0.0101419	1704.98	0.0202837	1705	1.18966e-05	1.33239e-05
	1.76	0.982622	3437	0	3437	0	3437	0	0	6.56	1	1705.99	0.0101485	1705.98	0.0202971	1706	1.18975e-05	1.33239e-05
	1.75	0.982217	3439	1	3438	2	3440	0.000581395	0.00058072	6.55	1	1706.99	0.0101552	1706.98	0.0203104	1707	1.18983e-05	1.3336e-05
	1.74	0.981803	3443	1	3442	2	3444	0.00058072	0.00058072	6.54	1	1707.99	0.0101619	1707.98	0.0203237	1708	1.18991e-05	1.33562e-05
	1.72	0.980945	3445	2	3443	4	3447	0.00116043	0.00115141	6.54	1	1708.99	0.0101685	1708.98	0.0203371	1709	1.19e-05	1.33562e-05
	1.71	0.980502	3448	2	3446	4	3450	0.00115942	0.00115141	6.54	1	1709.99	0.0101752	1709.98	0.0203505	1710	1.19008e-05	1.33562e-05
	1.7	0.980047	3453	2	3451	4	3455	0.00115774	0.00115141	6.54	1	1710.99	0.0101819	1710.98	0.0203638	1711	1.19017e-05	1.33562e-05
	1.69	0.979583	3454	2	3452	4	3456	0.00115741	0.00115141	6.53	1	1711.99	0.0101886	1711.98	0.0203772	1712	1.19026e-05	1.33767e-05
	1.68	0.979107	3459	2	3457	4	3461	0.00115574	0.00115141	6.52	1	1712.99	0.0101953	1712.98	0.0203906	1713	1.19034e-05	1.34016e-05
	1.67	0.97862	3461	2	3459	4	3463	0.00115507	0.00115141	6.52	1	1713.99	0.010202	1713.98	0.020404	1714	1.19043e-05	1.34016e-05
	1.66	0.978122	3466	2	3464	4	3468	0.0011534	0.00115141	6.52	1	1714.99	0.0102087	1714.98	0.0204174	1715	1.19052e-05	1.34016e-05
	1.65	0.977613	3468	2	3466	4	3470	0.00115274	0.00115141	6.52	1	1715.99	0.0102154	1715.98	0.0204308	1716	1.19061e-05	1.34016e-05
	1.64	0.977091	3471	2	3469	4	3473	0.00115174	0.00115141	6.52	1	1716.99	0.0102221	1716.98	0.0204442	1717	1.19069e-05	1.34016e-05
	1.63	0.976558	3472	2	3470	4	3474	0.00115141	0.00115141	6.51	1	1717.99	0.0102288	1717.98	0.0204576	1718	1.19078e-05	1.34312e-05
	1.62	0.976012	3480	3	3477	6	3483	0.00172265	0.00170794	6.51	1	1718.99	0.0102355	1718.98	0.0204711	1719	1.19087e-05	1.34312e-05
	1.61	0.975453	3484	3	3481	6	3487	0.00172068	0.00170794	6.5	1	1719.99	0.0102423	1719.98	0.0204845	1720	1.19096e-05	1.34441e-05
	1.6	0.974881	3487	3	3484	6	3490	0.0017192	0.00170794	6.49	1	1720.99	0.010249	1720.98	0.020498	1721	1.19105e-05	1.3457e-05
	1.59	0.974296	3495	3	3492	6	3498	0.00171527	0.00170794	6.49	1	1721.99	0.0102557	1721.98	0.0205114	1722	1.19114e-05	1.3457e-05
	1.58	0.973697	3498	3	3495	6	3501	0.0017138	0.00170794	6.47	1	1722.99	0.0102624	1722.98	0.0205249	1723	1.19123e-05	1.34701e-05
	1.57	0.973085	3505	3	3502	6	3508	0.00171038	0.00170794	6.46	1	1723.99	0.0102692	1723.98	0.0205384	1724	1.19132e-05	1.34832e-05
	1.55	0.971816	3510	3	3507	6	3513	0.00170794	0.00170794	6.46	1	1724.99	0.0102759	1724.98	0.0205519	1725	1.19141e-05	1.34832e-05
	1.54	0.97116	3515	4	3511	8	3519	0.00227337	0.00220325	6.45	1	1725.99	0.0102827	1725.98	0.0205654	1726	1.1915e-05	1.35009e-05
	1.53	0.970488	3520	4	3516	8	3524	0.00227015	0.00220325	6.45	1	1726.99	0.0102894	1726.98	0.0205789	1727	1.1916e-05	1.35009e-05
	1.52	0.9698	3525	4	3521	8	3529	0.00226693	0.00220325	6.44	1	1727.99	0.0102962	1727.98	0.0205924	1728	1.19169e-05	1.35188e-05
	1.51	0.969097	3533	4	3529	8	3537	0.0022618	0.00220325	6.44	1	1728.99	0.010303	1728.98	0.0206059	1729	1.19178e-05	1.35188e-05
	1.5	0.968377	3534	4	3530	8	3538	0.00226116	0.00220325	6.43	1	1729.99	0.0103097	1729.98	0.0206194	1730	1.19187e-05	1.35369e-05
	1.49	0.967641	3536	4	3532	8	3540	0.00225989	0.00220325	6.43	1	1730.99	0.0103165	1730.98	0.020633	1731	1.19197e-05	1.35369e-05
	1.48	0.966887	3545	4	3541	8	3549	0.00225416	0.00220325	6.42	1	1731.99	0.0103233	1731.98	0.0206465	1732	1.19206e-05	1.35736e-05
	1.47	0.966116	3548	4	3544	8	3552	0.00225225	0.00220325	6.42	1	1732.99	0.01033	1732.98	0.0206601	1733	1.19216e-05	1.35736e-05
	1.46	0.965326	3553	4	3549	8	3557	0.00224909	0.00220325	6.42	1	1733.99	0.0103368	1733.98	0.0206737	1734	1.19225e-05	1.35736e-05
	1.45	0.964519	3555	4	3551	8	3559	0.00224782	0.00220325	6.42	1	1734.99	0.0103436	1734.98	0.0206872	1735	1.19235e-05	1.35736e-05
	1.44	0.963692	3559	4	3555	8	3563	0.0022453	0.00220325	6.42	1	1735.99	0.0103504	1735.98	0.0207008	1736	1.19244e-05	1.35736e-05
	1.43	0.962846	3561	4	3557	8	3565	0.00224404	0.00220325	6.42	1	1736.99	0.0103572	1736.98	0.0207144	1737	1.19254e-05	1.35736e-05
	1.42	0.961981	3565	4	3561	8	3569	0.00224152	0.00220325	6.41	1	1737.99	0.010364	1737.98	0.020728	1738	1.19264e-05	1.36063e-05
	1.41	0.961095	3570	4	3566	8	3574	0.00223839	0.00220325	6.4	1	1738.99	0.0103708	1738.98	0.0207416	1739	1.19273e-05	1.36205e-05
	1.4	0.960189	3575	4	3571	8	3579	0.00223526	0.00220325	6.4	1	1739.99	0.0103776	1739.98	0.0207553	1740	1.19283e-05	1.36205e-05
	1.39	0.959262	3578	4	3574	8	3582	0.00223339	0.00220325	6.39	1	1740.99	0.0103844	1740.98	0.0207689	1741	1.19293e-05	1.36348e-05
	1.38	0.958313	3583	4	3579	8	3587	0.00223028	0.00220325	6.37	1	1741.99	0.0103913	1741.98	0.0207825	1742	1.19303e-05	1.36541e-05
	1.37	0.957342	3590	4	3586	8	3594	0.00222593	0.00220325	6.37	1	1742.99	0.0103981	1742.98	0.0207962	1743	1.19313e-05	1.36541e-05
	1.36	0.956348	3596	4	3592	8	3600	0.00222222	0.00220325	6.37	1	1743.99	0.0104049	1743.98	0.0208099	1744	1.19323e-05	1.36541e-05
	1.35	0.955332	3599	4	3595	8	3603	0.00222037	0.00220325	6.36	1	1744.99	0.0104118	1744.98	0.0208235	1745	1.19333e-05	1.36735e-05
	1.34	0.954291	3607	4	3603	8	3611	0.00221545	0.00220325	6.35	1	1745.99	0.0104186	1745.98	0.0208372	1746	1.19343e-05	1.36883e-05
	1.33	0.953226	3609	4	3605	8	3613	0.00221423	0.00220325	6.35	1	1746.99	0.0104255	1746.98	0.0208509	1747	1.19353e-05	1.36883e-05
	1.32	0.952137	3610	4	3606	8	3614	0.00221361	0.00220325	6.34	1	1747.99	0.0104323	1747.98	0.0208646	1748	1.19363e-05	1.37131e-05
	1.31	0.951022	3614	4	3610	8	3618	0.00221117	0.00220325	6.34	1	1748.99	0.0104392	1748.98	0.0208783	1749	1.19373e-05	1.37131e-05
	1.3	0.949881	3618	4	3614	8	3622	0.00220872	0.00220325	6.34	1	1749.99	0.010446	1749.98	0.0208921	1750	1.19383e-05	1.37131e-05
	1.29	0.948714	3625	4	3621	8	3629	0.00220446	0.00220325	6.33	1	1750.99	0.0104529	1750.98	0.0209058	1751	1.19393e-05	1.37382e-05
	1.28	0.947519	3626	4	3622	8	3630	0.00220386	0.00220325	6.33	1	1751.99	0.0104598	1751.98	0.0209195	1752	1.19404e-05	1.37382e-05
	1.27	0.946297	3627	4	3623	8	3631	0.00220325	0.00220325	6.32	1	1752.99	0.0104666	1752.98	0.0209333	1753	1.19414e-05	1.37688e-05
	1.26	0.945046	3629	5	3624	10	3634	0.00275179	0.00274348	6.32	1	1753.99	0.0104735	1753.98	0.020947	1754	1.19424e-05	1.37688e-05
	1.24	0.942456	3632	5	3627	10	3637	0.00274952	0.00274348	6.32	1	1754.99	0.0104804	1754.98	0.0209608	1755	1.19435e-05	1.37688e-05
	1.23	0.941116	3635	5	3630	10	3640	0.00274725	0.00274348	6.32	1	1755.99	0.0104873	1755.98	0.0209746	1756	1.19445e-05	1.37688e-05
	1.22	0.939744	3638	5	3633	10	3643	0.00274499	0.00274348	6.31	1	1756.99	0.0104942	1756.98	0.0209884	1757	1.19456e-05	1.38051e-05
	1.21	0.938341	3640	5	3635	10	3645	0.00274348	0.00274348	6.31	1	1757.99	0.0105011	1757.98	0.0210022	1758	1.19466e-05	1.38051e-05
	1.2	0.936904	3643	6	3637	12	3649	0.00328857	0.00326886	6.31	1	1758.99	0.010508	1758.98	0.021016	1759	1.19477e-05	1.38051e-05
	1.19	0.935435	3646	6	3640	12	3652	0.00328587	0.00326886	6.3	0.999999	1759.99	0.0105149	1759.98	0.0210298	1760	1.19488e-05	1.38261e-05
	1.18	0.933931	3649	6	3643	12	3655	0.00328317	0.00326886	6.29	0.999999	1760.99	0.0105218	1760.98	0.0210437	1761	1.19498e-05	1.3842e-05
	1.17	0.932392	3653	6	3647	12	3659	0.00327958	0.00326886	6.29	0.999999	1761.99	0.0105288	1761.98	0.0210575	1762	1.19509e-05	1.3842e-05
	1.16	0.930817	3654	6	3648	12	3660	0.00327869	0.00326886	6.28	0.999999	1762.99	0.0105357	1762.98	0.0210714	1763	1.1952e-05	1.38581e-05
	1.15	0.929205	3657	6	3651	12	3663	0.003276	0.00326886	6.27	0.999999	1763.99	0.0105426	1763.98	0.0210853	1764	1.19531e-05	1.38742e-05
	1.14	0.927556	3664	6	3658	12	3670	0.00326975	0.00326886	6.27	0.999999	1764.99	0.0105496	1764.98	0.0210991	1765	1.19542e-05	1.38742e-05
	1.13	0.925869	3665	6	3659	12	3671	0.00326886	0.00326886	6.26	0.999999	1765.99	0.0105565	1765.98	0.021113	1766	1.19553e-05	1.39014e-05
	1.12	0.924142	3668	7	3661	14	3675	0.00380952	0.00378685	6.26	0.999999	1766.99	0.0105635	1766.98	0.0211269	1767	1.19564e-05	1.39014e-05
	1.11	0.922375	3674	7	3667	14	3681	0.00380331	0.00378685	6.26	0.999999	1767.99	0.0105704	1767.98	0.0211408	1768	1.19575e-05	1.39014e-05
	1.1	0.920567	3677	7	3670	14	3684	0.00380022	0.00378685	6.24	0.999999	1768.99	0.0105774	1768.98	0.0211548	1769	1.19586e-05	1.39346e-05
	1.09	0.918717	3684	7	3677	14	3691	0.00379301	0.00378685	6.24	0.999999	1769.99	0.0105843	1769.98	0.0211687	1770	1.19597e-05	1.39346e-05
	1.08	0.916824	3690	7	3683	14	3697	0.00378685	0.00378685	6.24	0.999999	1770.99	0.0105913	1770.98	0.0211826	1771	1.19608e-05	1.39346e-05
	1.07	0.914886	3696	8	3688	16	3704	0.00431965	0.00431616	6.23	0.999999	1771.99	0.0105983	1771.98	0.0211966	1772	1.1962e-05	1.39626e-05
	1.06	0.912904	3699	8	3691	16	3707	0.00431616	0.00431616	6.23	0.999999	1772.99	0.0106053	1772.98	0.0212106	1773	1.19631e-05	1.39626e-05
	1.05	0.910875	3701	9	3692	18	3710	0.00485175	0.00484783	6.21	0.999999	1773.99	0.0106123	1773.98	0.0212245	1774	1.19642e-05	1.3991e-05
	1.04	0.908799	3704	9	3695	18	3713	0.00484783	0.00484783	6.21	0.999999	1774.99	0.0106193	1774.98	0.0212385	1775	1.19654e-05	1.3991e-05
	1.03	0.906675	3711	10	3701	20	3721	0.0053749	0.00535045	6.21	0.999999	1775.99	0.0106263	1775.98	0.0212525	1776	1.19665e-05	1.3991e-05
	1.02	0.904501	3713	10	3703	20	3723	0.00537201	0.00535045	6.2	0.999999	1776.99	0.0106333	1776.98	0.0212666	1777	1.19677e-05	1.40255e-05
	1.01	0.902276	3722	10	3712	20	3732	0.00535906	0.00535045	6.2	0.999999	1777.99	0.0106403	1777.98	0.0212806	1778	1.19688e-05	1.40255e-05
	1	0.9	3728	10	3718	20	3738	0.00535045	0.00535045	6.2	0.999999	1778.99	0.0106473	1778.98	0.0212946	1779	1.197e-05	1.40255e-05
	0.98	0.895287	3734	11	3723	22	3745	0.0058745	0.00584795	6.19	0.999999	1779.99	0.0106543	1779.98	0.0213087	1780	1.19712e-05	1.40606e-05
	0.97	0.892848	3738	11	3727	22	3749	0.00586823	0.00584795	6.19	0.999999	1780.99	0.0106614	1780.98	0.0213227	1781	1.19723e-05	1.40606e-05
	0.96	0.890352	3740	11	3729	22	3751	0.0058651	0.00584795	6.19	0.999999	1781.99	0.0106684	1781.98	0.0213368	1782	1.19735e-05	1.40606e-05
[truncated: 3,014 more rows]

## Sheet: Distinct Peptide Level Data
Distinct Peptide Level Data		Confidence Threshold	Forward	Reverse	Correct	Incorrect	Total	Global FDR	q-value		Fit Confidence Threshold	Fit Forward	Fit Reverse	Fit Correct	Fit Incorrect	Fit Total	Fit Global FDR	Fit Local FDR
[truncated: 11,187 more rows]

[truncated: 4 more sheets: Spectral Level Data, Single Results Table, PDST Controls, Protein Summary]
