# Supplementary material for: A multi-omics study of the anti-cancer effect of a ferulic acid derivative FA-30
Source: Royal Society of Chemistry journal article supplement (doi:10.1039/d2mo00025c), 2022-07-27
Supplement: d2mo00025c6.pdf [file d2mo00025c6.pdf]

## Supplementary information

1

2

3 Multi-omics study of the anti-cancer effect of a ferulic acid derivative FA-30

4

5 Dongyao Wang<sup>†, a</sup>, Dandan Guo<sup>†, a</sup>, Yuxiao Tang<sup>†, b</sup>, Minyu Qi<sup>a</sup>, Jiahao Fang<sup>a</sup>, Ying Zhang<sup>a</sup>,  
6 Yifeng Chai<sup>\*, a</sup>, Yan Cao<sup>\*, a</sup>, Diya Lv<sup>\*, a</sup>

7

8 a. Shanghai Key Laboratory for Pharmaceutical Metabolite Research, School of Pharmacy,  
9 Second Military Medical University, Shanghai 200433, China

10 b. Department of nutrition, Second Military Medical University, Shanghai, China

11 Dongyao Wang: ORCID iD: 0000-0002-5852-2640

12 Diya Lv: ORCID iD: 0000-0002-6159-4311

13

14 **† These authors contributed equally.**

15 **\*To whom correspondence should be addressed.**

16 Diya Lv, Ph.D. Address: No. 325, Guohe Road, Shanghai, China. E-mail:  
17 lvdy2020@smmu.edu.cn. Correspondence may also be addressed to Yan Cao, Ph.D. No. 325,  
18 Guohe Road, Shanghai, China. E-mail:caoyan@smmu.edu.cn; Yifeng Chai, Ph.D. No. 325,  
19 Guohe Road, Shanghai, China. E-mail:yfchai@smmu.edu.cn.

20

21 Lead Contact: Diya Lv, Ph.D. E-mail: lvdy2020@smmu.edu.cn.

22

### 23 Author contributions

24

25 Dr. D.W: Conceptualization; Investigation; Writing – original draft; Writing – review & editing

26 Dr. D.G: Investigation; Formal analysis

27 Dr. Y. T: Investigation; Formal analysis

28 Miss M.Q: Investigation; Validation

29 Mr. J.F: Investigation;

30 Miss Y.Z: Investigation

31 Prof. Y.C (Yifeng Chai): Writing – review & editing

32 Prof. Y.C (Yan Cao): Funding acquisition; Writing – review & editing

33 Prof. D.L: Conceptualization; Funding acquisition; Writing – original draft; Writing – review &  
34 editing.

35

### 36 Conflict of interest

37

38 There are no conflicts to declare.

39

### 40 Acknowledgement

41

42 This study was sponsored by the National Natural Science Foundation of China (82174092, to  
43 Yan Cao; 82003711, to Dongyao Wang), the Science and Technology Commission of Shanghai

44 Municipality (21ZR1483000, to Yan Cao; 22ZR1476900, to Diya Lv), and the Shanghai Pujiang  
45 Program (21PJD083, to Yan Cao).

46 **Data Availability**

47

48 The raw data of the metabolomics and proteomics studies has been uploaded into the Mendeley  
49 Data repository (wang, dongyao (2022), “Metabolomics and Proteomics Research of FA-30”,  
50 Mendeley Data, V1, doi: 10.17632/mkrzs2rsm4.1).

51 The contents are listed below:

52 metabonomic raw data-negative-hilic-blank-fa30.xlsx

53 metabonomic raw data-negative-reverse phase-blank-fa30.xlsx

54 metabonomic raw data-positive-hilic-blank-fa30.xlsx

55 metabonomic raw data- positive -reverse phase-blank-fa30.xlsx

56 proteomics data-iTRAQ 8plex -blank-fa30.xlsx

57

58

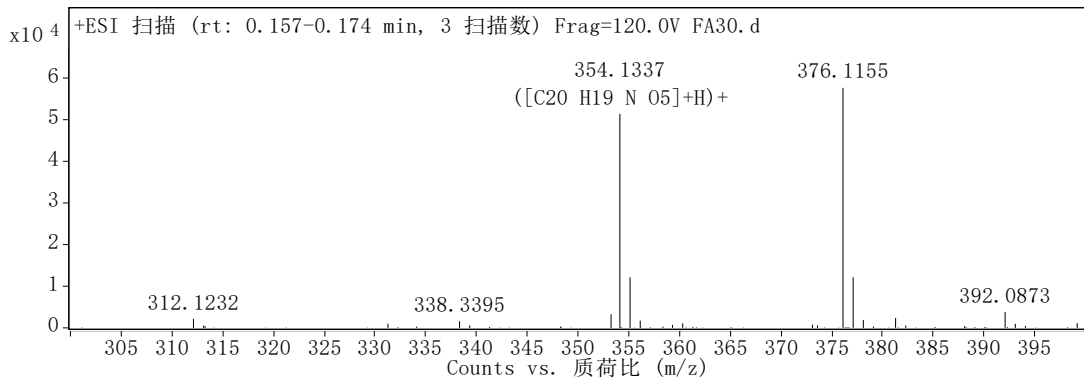

59

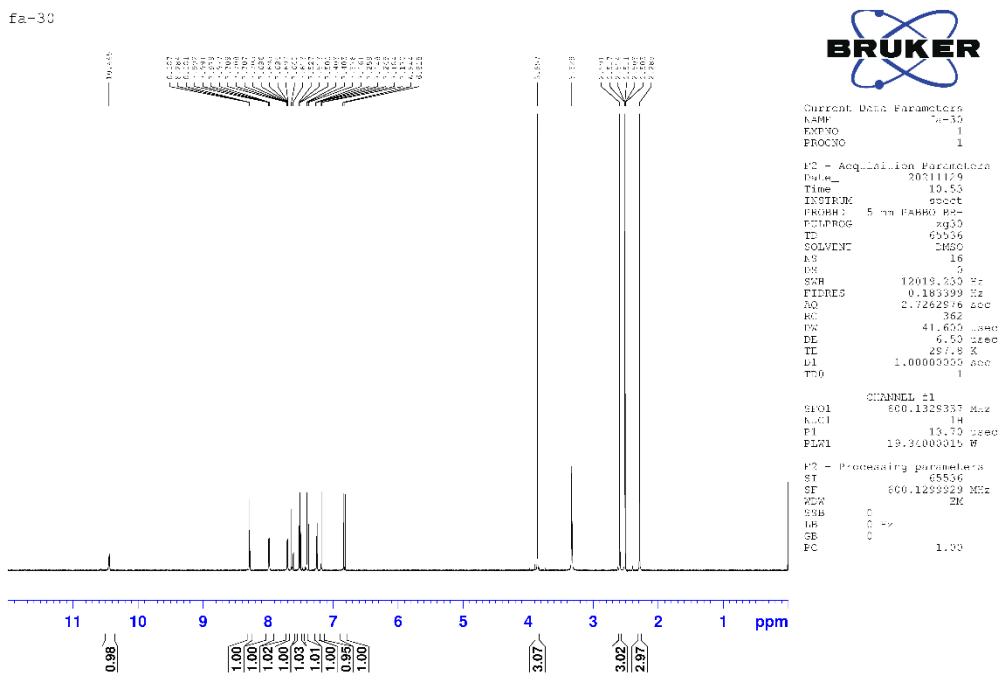

60

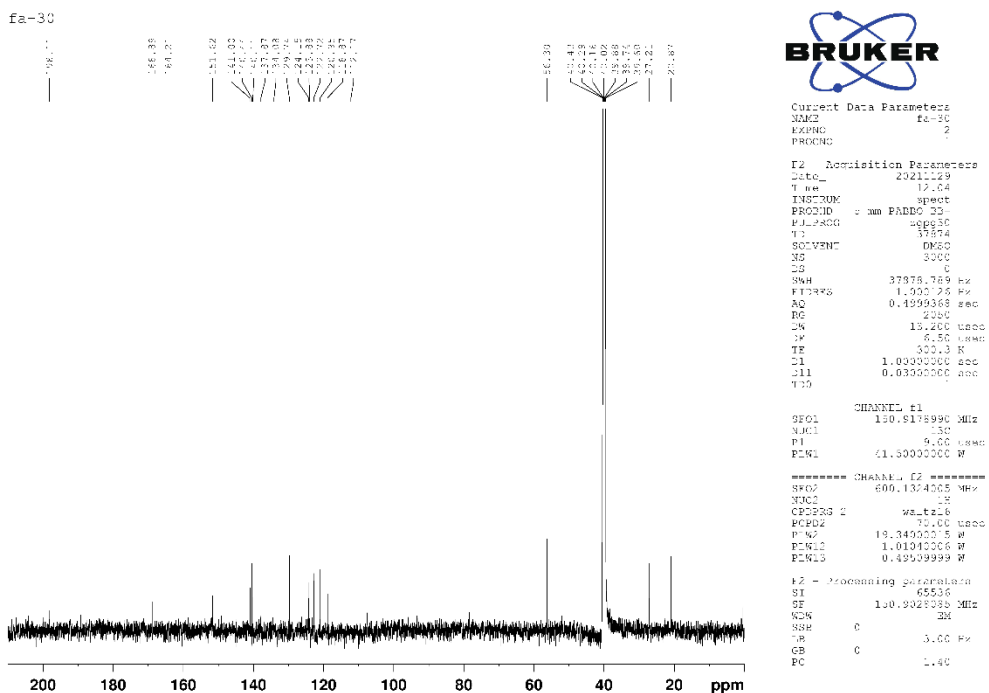

61

62

63 Fig S1 : The mass spectrometry and NMR spectrum of FA-30. Top, mass spectrum; middle, <sup>1</sup>H

64 NMR spectrum; bottom, <sup>13</sup>C NMR spectrum.

65

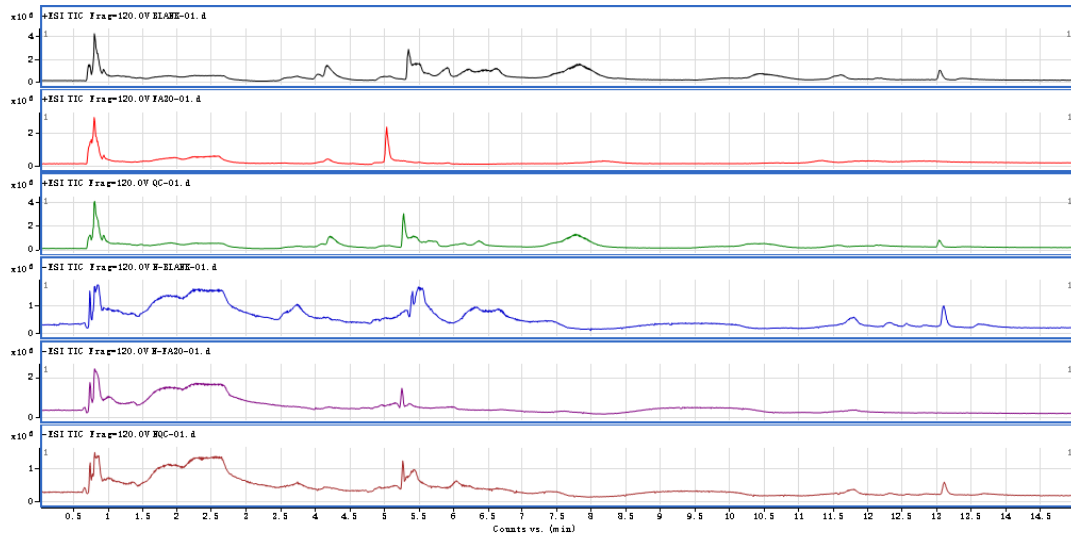

66

67

68 Fig S2: The total ion chromatography spectrums of Blank, FA-30 and QC samples in Hilic  
 69 separation mode. From top to bottom, Blank in positive, FA-30 in positive, QC in positive, Blank  
 70 in negative, FA-30 in negative, QC in negative.

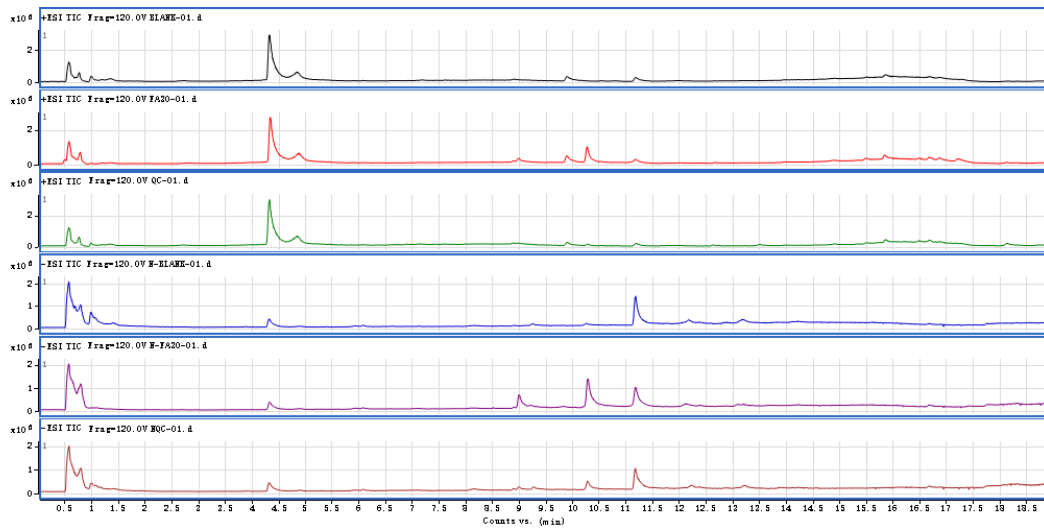

Fig S3: The total ion chromatography spectrums of Blank, FA-30 and QC samples in reversed-phase separation mode. From top to bottom, Blank in positive, FA-30 in positive, QC in positive, Blank in negative, FA-30 in negative, QC in negative.

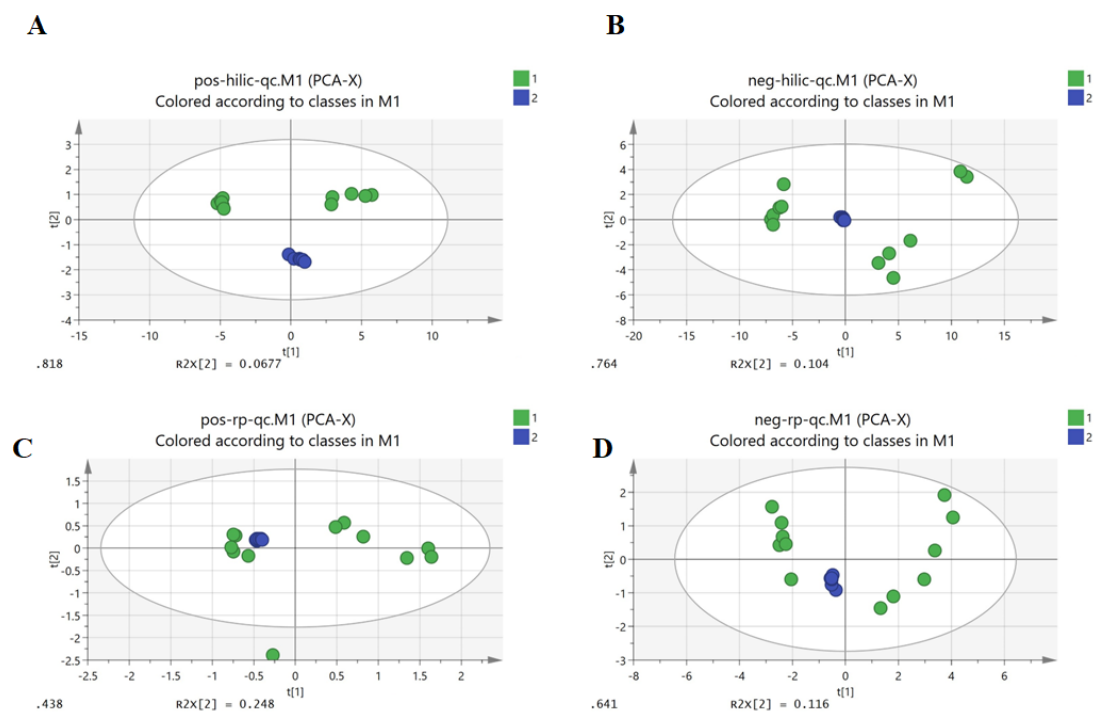

Fig S4: The score plot of the principal component analysis model for the sample group and QC group based on liquid chromatography–tandem mass spectrometry data. (A) Hilic chromatography in positive mode. (B) Hilic chromatography in negative mode. (C) Reverse phase chromatography in positive mode. (D) Reverse phase chromatography in negative mode.  $n=6$  in each group, green represented samples, blue represented QC.

Table S1: The parameters of OPLS-DA models

| No. | Separation mode | Detection mode | Type    | R2X(cum) | R2Y(cum) | Q2(cum) |
|-----|-----------------|----------------|---------|----------|----------|---------|
| 1   | Hilic           | positive       | OPLS-DA | 0.918    | 0.991    | 0.975   |
| 2   | Hilic           | negative       | OPLS-DA | 0.91     | 0.991    | 0.984   |
| 3   | Reverse phase   | positive       | OPLS-DA | 0.63     | 0.982    | 0.965   |
| 4   | Reverse phase   | negative       | OPLS-DA | 0.792    | 0.99     | 0.977   |



Table S2 : The potential biomarkers based on metabolome profiling

| Var ID        | mzme<br>d    | rtmed       | Metabolite                       | Formula         | Adduct       | VIP<br>value | P value      |
|---------------|--------------|-------------|----------------------------------|-----------------|--------------|--------------|--------------|
| M116T3<br>43  | 116.0<br>708 | 5.714       | L-Proline                        | C5H9NO2         | M+H          | 1.1360<br>7  | 1.92E-<br>05 |
| M130T3<br>68  | 130.0<br>5   | 6.141<br>5  | N-Acryloylglycine                | C5H7NO3         | M+H          | 1.2842<br>9  | 0.00138<br>9 |
| M200T2<br>51  | 200.0<br>483 | 4.187       | 1-Isothiocyanato-3-phenylpropane | C10H11NS        | M+Na         | 1.4893<br>8  | 0.00232<br>8 |
| M308T3<br>61  | 308.0<br>927 | 6.009<br>5  | Glutathione                      | C10H17N3<br>O6S | M+H          | 1.1521<br>6  | 4.5E-06      |
| M130T2<br>92  | 130.1<br>59  | 4.868       | 4-Trimethylammonio butanal       | C7H16NO         | M+H          | 1.1376<br>4  | 0.00142<br>9 |
| M132T1<br>14  | 132.1<br>017 | 1.908       | L-Isoleucine                     | C6H13NO2        | M+H          | 1.1198<br>9  | 0.00033<br>7 |
| M132T8<br>0   | 132.1<br>018 | 1.34        | D-Leucine                        | C6H13NO2        | M+H          | 1.2835<br>3  | 3.57E-<br>05 |
| M143T4<br>1   | 142.9<br>484 | 0.685       | 3-Mercaptopyruvic acid           | C3H4O3S         | M+Na         | 1.1800<br>2  | 0.01028      |
| M158T5<br>94  | 158.1<br>543 | 9.906       | Tranexamic Acid                  | C8H15NO2        | M+H          | 4.8712<br>2  | 0.01478<br>2 |
| M159T3<br>3   | 158.9<br>641 | 0.556       | Dimethyldithiophosphate          | C2H7O2PS<br>2   | M+H          | 1.1949       | 0.01701<br>2 |
| M159T5<br>94  | 159.1<br>573 | 9.906       | Decyl alcohol                    | C10H22O         | M+H          | 1.5904<br>7  | 0.01605<br>4 |
| M199T2<br>53  | 199.1<br>442 | 4.208<br>5  | 1-Methyl-2-n-hexylbenzene        | C13H20          | M+Na         | 1.0072<br>7  | 0.03102<br>8 |
| M202T2<br>92  | 202.0<br>447 | 4.866       | Thiabendazole                    | C10H7N3S        | M+H          | 1.1156<br>2  | 0.01333<br>8 |
| M227T3<br>3   | 226.9<br>524 | 0.551       | Oltipraz                         | C8H6N2S3        | M+H          | 2.3800<br>6  | 0.01677<br>7 |
| M256T9<br>30  | 256.2<br>647 | 15.50<br>6  | Palmitic amide                   | C16H33NO        | M+H          | 2.0904<br>1  | 0.03675<br>9 |
| M308T6<br>1   | 308.0<br>919 | 1.011       | Glutathione                      | C10H17N3<br>O6S | M+H          | 1.0902<br>2  | 1.25E-<br>10 |
| M312T5<br>40  | 312.1<br>238 | 9.002       | Aspartyl-Arginine                | C10H19N5<br>O5  | M+Na         | 1.9200<br>3  | 4.2E-05      |
| M315T5<br>94  | 315.3<br>016 | 9.906       | 3-hydroxypristanic acid          | C19H38O3        | M+H          | 1.0112       | 0.01269<br>4 |
| M354T6<br>17  | 354.1<br>349 | 10.28<br>45 | Honyumine                        | C20H19NO<br>5   | M+H          | 3.7422<br>4  | 0.00066<br>9 |
| M355T6<br>17  | 355.1<br>379 | 10.28<br>5  | Tryptophyl-Glutamine             | C16H20N4<br>O4  | M+Na         | 1.6903<br>3  | 0.00052<br>6 |
| M363T3<br>3   | 362.9<br>274 | 0.549       | Fructose 1,6-bisphosphate        | C6H14O12P<br>2  | M+Na         | 1.3241<br>4  | 0.02286<br>2 |
| M376T6<br>17  | 376.1<br>164 | 10.28<br>6  | Honyumine                        | C20H19NO<br>5   | M+H          | 1.2016<br>1  | 0.00060<br>2 |
| M551T1<br>036 | 550.6<br>313 | 17.26<br>7  | Octadecane                       | C18H38          | 2M+AC<br>N+H | 2.2920<br>1  | 0.03992<br>7 |
| M566T1<br>137 | 565.5<br>693 | 18.95<br>4  | FAHFA(18:1(9Z)/9-O-18:0)         | C36H68O4        | M+H          | 1.2479<br>7  | 0.03786<br>2 |
| M707T6<br>17  | 707.2<br>618 | 10.27<br>8  | Citbismine C                     | C37H36N2<br>O11 | M+Na         | 1.3775<br>1  | 0.00794<br>5 |

|              |              |            |                                                           |                  |                    |             |              |
|--------------|--------------|------------|-----------------------------------------------------------|------------------|--------------------|-------------|--------------|
| M729T6<br>17 | 729.2<br>44  | 10.27<br>8 | N-<br>Desmethylritonavir                                  | C36H46N6<br>O5S2 | M+Na               | 1.2500<br>4 | 0.00507<br>8 |
| M839T3<br>3  | 838.8<br>404 | 0.547      | TG(14:0/O-<br>18:0/18:0)                                  | C53H104O5        | M+NH4              | 1.0606<br>3 | 0.03999      |
| M91T33       | 90.97<br>677 | 0.551      | Oxalic acid                                               | C2H2O4           | M+H                | 1.1482<br>3 | 0.01658<br>3 |
| M113T3<br>11 | 112.9<br>857 | 5.182      | Dimethyl sulfoxide                                        | C2H6OS           | M+Cl               | 1.7930<br>7 | 0.03009<br>2 |
| M113T8<br>2  | 112.9<br>862 | 1.365      | Parabanic Acid                                            | C3H2N2O3         | M-H                | 1.1892<br>5 | 0.00479<br>3 |
| M132T3<br>24 | 132.0<br>302 | 5.404      | L-Aspartic acid                                           | C4H7NO4          | M-H                | 1.2525<br>2 | 2.91E-<br>09 |
| M135T7<br>0  | 134.8<br>954 | 1.166      | Sulfate                                                   | H2O4S            | M+K-<br>2H         | 2.0255<br>9 | 0.04507<br>2 |
| M147T3<br>7  | 146.9<br>66  | 0.613      | Benzenethiol                                              | C6H6S            | M+K-<br>2H         | 1.0288<br>3 | 0.00884<br>9 |
| M147T6       | 146.9<br>661 | 0.095      | Methylphosphate                                           | CH5O4P           | M+Cl               | 2.4946<br>9 | 0.04743<br>8 |
| M215T9<br>2  | 215.0<br>334 | 1.529<br>5 | L-Gulose                                                  | C6H12O6          | M+Cl               | 1.1092<br>6 | 0.01127<br>6 |
| M249T3<br>08 | 248.9<br>604 | 5.127<br>5 | 2,5-Dimethyl-3-<br>furanthiol acetate                     | C8H10O2S         | M+Br               | 1.1358<br>9 | 0.03329<br>5 |
| M271T2<br>25 | 271.0<br>041 | 3.742      | 2-Propenyl 1-(2-<br>propenylsulfanyl)pr<br>opyl disulfide | C9H16OS3         | M+Cl               | 1.0813<br>7 | 2.3E-06      |
| M310T5<br>1  | 310.1<br>74  | 0.856      | Pipertipine                                               | C20H27NO<br>3    | M-H20-<br>H        | 1.0920<br>3 | 7.06E-<br>05 |
| M318T3<br>24 | 318.0<br>769 | 5.403      | gamma-<br>Glutamylcysteinylse<br>rine                     | C11H19N3<br>O7S  | M-H20-<br>H        | 1.3984<br>9 | 1.6E-10      |
| M373T4<br>7  | 373.1<br>055 | 0.783      | Acetyldeoxynivalen<br>ol                                  | C17H22O7         | M+Cl               | 1.0731      | 0.00011<br>8 |
| M385T3<br>08 | 384.9<br>355 | 5.135      | Uridine 2',3'-cyclic<br>phosphate                         | C9H11N2O<br>8P   | M+Br               | 1.0036<br>7 | 0.00809<br>7 |
| M388T4<br>4  | 388.1<br>555 | 0.74       | Trifluoperazine                                           | C21H24F3N<br>3S  | M-H20-<br>H        | 1.0381<br>6 | 0.00548      |
| M415T4<br>6  | 415.1<br>154 | 0.773      | (S)-Bitalin A 12-<br>glucoside                            | C19H24O8         | M+Cl               | 1.5826<br>7 | 0.00105<br>4 |
| M62T48       | 61.98<br>912 | 0.794      | Peroxynitrite                                             | HNO3             | M-H                | 1.9355<br>8 | 0.00849      |
| M748T6<br>86 | 747.5<br>651 | 11.42<br>7 | TG(14:1(9Z)/18:4(6<br>Z,9Z,12Z,15Z)/14:1<br>(9Z))         | C42H80O6         | M-<br>H+HCO<br>ONa | 1.0021<br>3 | 0.01270<br>7 |
| M310T5<br>40 | 310.1<br>092 | 9.004      | Tryptophyl-Alanine                                        | C14H17N3<br>O3   | M+Cl               | 1.1806<br>2 | 0.00022<br>6 |
| M415T6<br>17 | 415.1<br>154 | 10.28<br>9 | (S)-Bitalin A 12-<br>glucoside                            | C19H24O8         | M+Cl               | 1.1313<br>6 | 0.00075<br>8 |
| M398T6<br>17 | 398.1<br>252 | 10.28<br>9 | Adlumidiceine                                             | C21H21NO<br>7    | M-H                | 1.6614<br>2 | 0.00294<br>2 |
| M353T6<br>17 | 353.1<br>227 | 10.28<br>9 | Methyl<br>helianthoate F<br>glucoside                     | C17H22O8         | M-H                | 1.0560<br>1 | 0.00294<br>5 |
| M352T6<br>17 | 352.1<br>198 | 10.28<br>9 | Honyumine                                                 | C20H19NO<br>5    | M-H                | 2.3442<br>9 | 0.00318<br>6 |
| M445T6       | 444.9        | 11.18      | Butoconazole                                              | C19H17Cl3        | M+Cl               | 1.0863      | 0.00427      |

|        |       |       |                   |           |       |        |         |
|--------|-------|-------|-------------------|-----------|-------|--------|---------|
| 71     | 737   | 3     |                   | N2S       |       | 2      | 1       |
| M431T7 | 430.9 | 12.12 |                   | C16H16N2  |       | 1.0557 | 0.04273 |
| 28     | 743   | 6     | Cefalotin         | O6S2      | M+Cl  | 7      | 6       |
| M495T7 | 494.9 | 12.12 | 8-Hydroxyluteolin | C15H10O10 | M+TFA | 1.2078 | 0.04650 |
| 28     | 704   | 6     | 8-sulfate         | S         | -H    | 5      | 9       |

Table S3 : The KEGG enrichment analysis based on metabolome profiling

| Term ID  | Term description                            | RichFactor | p-value |
|----------|---------------------------------------------|------------|---------|
| hsa00270 | Cysteine and methionine metabolism          | 0.06349    | 8E-05   |
| hsa00970 | Aminoacyl-tRNA biosynthesis                 | 0.05769    | 0.00099 |
| hsa02010 | ABC transporters                            | 0.03226    | 0.00527 |
| hsa04974 | Protein digestion and absorption            | 0.06897    | 0.00564 |
| hsa05230 | Central carbon metabolism in cancer         | 0.06667    | 0.00603 |
| hsa00920 | Sulfur metabolism                           | 0.06061    | 0.00727 |
| hsa05418 | Fluid shear stress and atherosclerosis      | 0.16667    | 0.02378 |
| hsa05010 | Alzheimer disease                           | 0.08333    | 0.04704 |
| hsa00230 | Purine metabolism                           | 0.02105    | 0.05349 |
| hsa05131 | Shigellosis                                 | 0.07143    | 0.05467 |
| hsa05014 | Amyotrophic lateral sclerosis               | 0.07143    | 0.05467 |
| hsa04071 | Sphingolipid signaling pathway              | 0.06667    | 0.05847 |
| hsa04918 | Thyroid hormone synthesis                   | 0.05       | 0.07725 |
| hsa04976 | Bile secretion                              | 0.04545    | 0.08466 |
| hsa00220 | Arginine biosynthesis                       | 0.04348    | 0.08835 |
| hsa00290 | Valine, leucine and isoleucine biosynthesis | 0.04348    | 0.08835 |
| hsa04216 | Ferroptosis                                 | 0.03704    | 0.10296 |
| hsa00250 | Alanine, aspartate and glutamate metabolism | 0.03571    | 0.10658 |
| hsa00770 | Pantothenate and CoA biosynthesis           | 0.03333    | 0.11377 |
| hsa00010 | Glycolysis / Gluconeogenesis                | 0.03226    | 0.11735 |
| hsa00410 | beta-Alanine metabolism                     | 0.03125    | 0.12091 |
| hsa00030 | Pentose phosphate pathway                   | 0.02857    | 0.13153 |
| hsa00480 | Glutathione metabolism                      | 0.02632    | 0.14202 |
| hsa04080 | Neuroactive ligand-receptor interaction     | 0.025      | 0.14896 |
| hsa00280 | Valine, leucine and isoleucine degradation  | 0.02439    | 0.1524  |
| hsa00340 | Histidine metabolism                        | 0.02128    | 0.17281 |
| hsa00053 | Ascorbate and aldarate metabolism           | 0.02041    | 0.17952 |
| hsa00260 | Glycine, serine and threonine metabolism    | 0.02       | 0.18285 |
| hsa00310 | Lysine degradation                          | 0.02       | 0.18285 |
| hsa00051 | Fructose and mannose metabolism             | 0.01852    | 0.19605 |
| hsa00760 | Nicotinate and nicotinamide metabolism      | 0.01818    | 0.19932 |
| hsa00630 | Glyoxylate and dicarboxylate metabolism     | 0.01613    | 0.22187 |
| hsa00240 | Pyrimidine metabolism                       | 0.01538    | 0.23136 |
| hsa00330 | Arginine and proline metabolism             | 0.01282    | 0.27123 |

Table S4 : The GO enrichment analysis based on proteome profiling

| Term ID    | Term description                                            | p-value     | Category           |
|------------|-------------------------------------------------------------|-------------|--------------------|
| GO:0005829 | cytosol                                                     | 1.66E-15    | cellular_component |
| GO:0070062 | extracellular exosome                                       | 3.11E-15    | cellular_component |
| GO:0003723 | RNA binding                                                 | 4.09E-10    | molecular_function |
| GO:0016020 | membrane                                                    | 2.67E-09    | cellular_component |
| GO:0006412 | translation                                                 | 5.07E-07    | biological_process |
| GO:0045296 | cadherin binding                                            | 1.65E-06    | molecular_function |
| GO:0005737 | cytoplasm                                                   | 1.74E-06    | cellular_component |
| GO:0006418 | tRNA aminoacylation<br>for protein translation              | 1.02E-05    | biological_process |
| GO:0006564 | L-serine biosynthetic<br>process                            | 7.13E-05    | biological_process |
| GO:0042470 | melanosome                                                  | 9.19E-05    | cellular_component |
| GO:0003735 | structural constituent<br>of ribosome                       | 0.000140485 | molecular_function |
| GO:0005730 | nucleolus                                                   | 0.000142928 | cellular_component |
| GO:0043486 | histone exchange<br>translation factor                      | 0.000289236 | biological_process |
| GO:0008135 | activity, RNA<br>binding                                    | 0.000328415 | molecular_function |
| GO:0005524 | ATP binding                                                 | 0.000389471 | molecular_function |
| GO:0015175 | neutral amino acid<br>transmembrane<br>transporter activity | 0.000405643 | molecular_function |
| GO:0006183 | GTP biosynthetic<br>process                                 | 0.000555235 | biological_process |
| GO:0006413 | translational initiation                                    | 0.000692411 | biological_process |
| GO:0006796 | phosphate-containing<br>compound metabolic<br>process       | 0.000940574 | biological_process |
| GO:0003725 | double-stranded RNA<br>binding                              | 0.001020628 | molecular_function |
| GO:0051085 | chaperone cofactor-<br>dependent protein<br>refolding       | 0.001183452 | biological_process |
| GO:0031012 | extracellular matrix                                        | 0.001371227 | cellular_component |
| GO:0006913 | nucleocytoplasmic<br>transport                              | 0.00146247  | biological_process |
| GO:0051289 | protein<br>homotetramerization                              | 0.001869677 | biological_process |
| GO:0034976 | response to<br>endoplasmic<br>reticulum stress              | 0.00202066  | biological_process |
| GO:0030529 | intracellular<br>ribonucleoprotein<br>complex               | 0.002081834 | cellular_component |
| GO:0005925 | focal adhesion                                              | 0.00218194  | cellular_component |
| GO:0015186 | L-glutamine<br>transmembrane<br>transporter activity        | 0.002316243 | molecular_function |
| GO:0047134 | protein-disulfide<br>reductase activity                     | 0.002316243 | molecular_function |

|            |                                                                              |             |                    |
|------------|------------------------------------------------------------------------------|-------------|--------------------|
| GO:0005635 | nuclear envelope                                                             | 0.002322913 | cellular_component |
| GO:0019509 | L-methionine salvage<br>from                                                 | 0.00232632  | biological_process |
| GO:0034394 | methylthioadenosine<br>protein localization to<br>cell surface               | 0.002534352 | biological_process |
| GO:1900026 | positive regulation of<br>substrate adhesion-<br>dependent cell<br>spreading | 0.002975376 | biological_process |
| GO:0016569 | covalent chromatin<br>modification                                           | 0.003239641 | biological_process |
| GO:0003743 | translation initiation<br>factor activity                                    | 0.003302138 | molecular_function |
| GO:0033327 | Leydig cell<br>differentiation                                               | 0.003453837 | biological_process |
| GO:0035973 | aggrephagy                                                                   | 0.003453837 | biological_process |
| GO:0002039 | p53 binding                                                                  | 0.003615452 | molecular_function |
| GO:0008565 | protein transporter<br>activity                                              | 0.00376524  | molecular_function |
| GO:0005694 | chromosome                                                                   | 0.003949017 | cellular_component |
| GO:0001933 | negative regulation of<br>protein<br>phosphorylation                         | 0.003983162 | biological_process |
| GO:0051262 | protein<br>tetramerization                                                   | 0.003991751 | biological_process |
| GO:0015949 | nucleobase-<br>containing small<br>molecule<br>interconversion               | 0.003991751 | biological_process |
| GO:0006606 | protein import into<br>nucleus                                               | 0.004339156 | biological_process |
| GO:0061635 | regulation of protein<br>complex stability                                   | 0.004786043 | biological_process |
| GO:0006307 | DNA dealkylation<br>involved in DNA<br>repair                                | 0.004786043 | biological_process |
| GO:0042802 | identical protein<br>binding                                                 | 0.005224064 | molecular_function |
| GO:0005525 | GTP binding                                                                  | 0.005869173 | molecular_function |
| GO:0015935 | small ribosomal<br>subunit                                                   | 0.005916819 | cellular_component |
| GO:0030867 | rough endoplasmic<br>reticulum membrane                                      | 0.005916819 | cellular_component |
| GO:0019215 | intermediate filament<br>binding                                             | 0.006289545 | molecular_function |
| GO:0046686 | response to cadmium<br>ion                                                   | 0.006316373 | biological_process |
| GO:0009168 | purine ribonucleoside<br>monophosphate<br>biosynthetic process               | 0.006316373 | biological_process |
| GO:0006614 | SRP-dependent<br>cotranslational<br>protein targeting to<br>membrane         | 0.006931623 | biological_process |

|            |                                                             |             |                    |
|------------|-------------------------------------------------------------|-------------|--------------------|
| GO:0008536 | Ran GTPase binding                                          | 0.00732506  | molecular_function |
| GO:0000502 | proteasome complex                                          | 0.007617405 | cellular_component |
| GO:0005975 | carbohydrate<br>metabolic process                           | 0.007653679 | biological_process |
| GO:0015804 | neutral amino acid<br>transport                             | 0.008038412 | biological_process |
| GO:0006414 | translational<br>elongation                                 | 0.008038412 | biological_process |
| GO:0005643 | nuclear pore                                                | 0.008144265 | cellular_component |
| GO:0006986 | response to unfolded<br>protein                             | 0.008199935 | biological_process |
| GO:0051287 | NAD binding                                                 | 0.009023159 | molecular_function |
| GO:0000049 | tRNA binding                                                | 0.009055764 | molecular_function |
| GO:0005721 | pericentric<br>heterochromatin                              | 0.009322951 | cellular_component |
| GO:0030496 | midbody                                                     | 0.009837765 | cellular_component |
| GO:0015194 | L-serine<br>transmembrane<br>transporter activity           | 0.009904208 | molecular_function |
| GO:0006228 | UTP biosynthetic<br>process                                 | 0.009945896 | biological_process |
| GO:0005741 | mitochondrial outer<br>membrane                             | 0.01022074  | cellular_component |
| GO:0042393 | histone binding                                             | 0.010237212 | molecular_function |
| GO:0005913 | cell-cell adherens<br>junction                              | 0.010489108 | cellular_component |
| GO:0000781 | chromosome,<br>telomeric region                             | 0.011004128 | cellular_component |
| GO:0030433 | ubiquitin-dependent<br>ERAD pathway                         | 0.011050212 | biological_process |
| GO:0006461 | protein complex<br>assembly                                 | 0.011902529 | biological_process |
| GO:0030971 | receptor tyrosine<br>kinase binding                         | 0.011968463 | molecular_function |
| GO:0007004 | telomere maintenance<br>via telomerase                      | 0.01203271  | biological_process |
| GO:0061001 | regulation of<br>dendritic spine<br>morphogenesis           | 0.01203271  | biological_process |
| GO:1903076 | regulation of protein<br>localization to plasma<br>membrane | 0.01203271  | biological_process |
| GO:0006241 | CTP biosynthetic<br>process                                 | 0.01203271  | biological_process |
| GO:0006865 | amino acid transport                                        | 0.012043139 | biological_process |
| GO:0016235 | aggresome                                                   | 0.013067699 | cellular_component |
| GO:0017101 | aminoacyl-tRNA<br>synthetase<br>multienzyme<br>complex      | 0.01340654  | cellular_component |
| GO:0031966 | mitochondrial<br>membrane                                   | 0.013981792 | cellular_component |
| GO:0098641 | cadherin binding<br>involved in cell-cell<br>adhesion       | 0.014233759 | molecular_function |

|            |                                                            |             |                    |
|------------|------------------------------------------------------------|-------------|--------------------|
| GO:0008191 | metalloendopeptidase inhibitor activity                    | 0.014233759 | molecular_function |
| GO:0010629 | negative regulation of gene expression                     | 0.014845851 | biological_process |
| GO:0022627 | cytosolic small ribosomal subunit                          | 0.015337265 | cellular_component |
| GO:0005840 | ribosome                                                   | 0.016550031 | cellular_component |
| GO:0042288 | MHC class I protein binding                                | 0.016651868 | molecular_function |
| GO:0019843 | rRNA binding                                               | 0.016659593 | molecular_function |
| GO:0005080 | protein kinase C binding                                   | 0.016659593 | molecular_function |
| GO:0040014 | regulation of multicellular organism growth                | 0.016720571 | biological_process |
| GO:0006259 | DNA metabolic process                                      | 0.016720571 | biological_process |
| GO:0021766 | hippocampus development                                    | 0.016761297 | biological_process |
| GO:0005813 | centrosome                                                 | 0.016835754 | cellular_component |
| GO:0001618 | virus receptor activity                                    | 0.01797108  | molecular_function |
| GO:0043123 | positive regulation of I-kappaB kinase/NF-kappaB signaling | 0.018976918 | biological_process |
| GO:0004033 | aldo-keto reductase (NADP) activity                        | 0.019231276 | molecular_function |
| GO:0016779 | nucleotidyltransferase activity                            | 0.019231276 | molecular_function |
| GO:0006488 | dolichol-linked oligosaccharide biosynthetic process       | 0.019310091 | biological_process |
| GO:0032092 | positive regulation of protein binding                     | 0.019455241 | biological_process |
| GO:0002576 | platelet degranulation                                     | 0.020228268 | biological_process |
| GO:0005874 | microtubule                                                | 0.020508567 | cellular_component |
| GO:0034719 | SMN-Sm protein complex                                     | 0.020708564 | cellular_component |
| GO:0006334 | nucleosome assembly                                        | 0.021300017 | biological_process |
| GO:0035249 | synaptic transmission, glutamatergic                       | 0.022055879 | biological_process |
| GO:0043113 | receptor clustering                                        | 0.022055879 | biological_process |
| GO:0097225 | sperm midpiece                                             | 0.023435917 | cellular_component |
| GO:0005720 | nuclear heterochromatin                                    | 0.023435917 | cellular_component |
| GO:0015171 | amino acid transmembrane transporter activity              | 0.023777003 | molecular_function |
| GO:0000723 | telomere maintenance                                       | 0.024952507 | biological_process |
| GO:0000060 | protein import into nucleus, translocation                 | 0.024952507 | biological_process |
| GO:0042073 | intraciliary transport                                     | 0.024952507 | biological_process |
| GO:0006611 | protein export from nucleus                                | 0.024952507 | biological_process |
| GO:1904813 | ficolin-1-rich granule                                     | 0.026235921 | cellular_component |



|            |                                                           |             |                    |
|------------|-----------------------------------------------------------|-------------|--------------------|
| GO:0000784 | lumen<br>nuclear chromosome,<br>telomeric region          | 0.026508898 | cellular_component |
| GO:0036498 | IRE1-mediated<br>unfolded protein<br>response             | 0.027175107 | biological_process |
| GO:0042803 | protein<br>homodimerization<br>activity                   | 0.027279515 | molecular_function |
| GO:0071363 | cellular response to<br>growth factor<br>stimulus         | 0.027994677 | biological_process |
| GO:0043525 | positive regulation of<br>neuron apoptotic<br>process     | 0.027994677 | biological_process |
| GO:0035338 | long-chain fatty-acyl-<br>CoA biosynthetic<br>process     | 0.027994677 | biological_process |
| GO:0030170 | pyridoxal phosphate<br>binding                            | 0.030479431 | molecular_function |
| GO:0043022 | ribosome binding                                          | 0.030479431 | molecular_function |
| GO:1900034 | regulation of cellular<br>response to heat                | 0.030656471 | biological_process |
| GO:0005634 | nucleus<br>nucleoside                                     | 0.030802305 | cellular_component |
| GO:0004550 | diphosphate kinase<br>activity                            | 0.031053339 | molecular_function |
| GO:0042826 | histone deacetylase<br>binding                            | 0.031491176 | molecular_function |
| GO:0006890 | retrograde vesicle-<br>mediated transport,<br>Golgi to ER | 0.031726522 | biological_process |
| GO:0000166 | nucleotide binding                                        | 0.034164666 | molecular_function |
| GO:0043015 | gamma-tubulin<br>binding                                  | 0.034358942 | molecular_function |
| GO:0005487 | nucleocytoplasmic<br>transporter activity                 | 0.034358942 | molecular_function |
| GO:0030234 | enzyme regulator<br>activity                              | 0.034358942 | molecular_function |
| GO:0006325 | chromatin<br>organization                                 | 0.034360904 | biological_process |
| GO:0048675 | axon extension                                            | 0.034495081 | biological_process |
| GO:0016049 | cell growth                                               | 0.034495081 | biological_process |
| GO:0015035 | protein disulfide<br>oxidoreductase<br>activity           | 0.037794605 | molecular_function |
| GO:0071889 | 14-3-3 protein<br>binding                                 | 0.037794605 | molecular_function |
| GO:0003924 | GTPase activity                                           | 0.038600842 | molecular_function |
| GO:0002931 | response to ischemia                                      | 0.041517194 | biological_process |
| GO:0071407 | cellular response to<br>organic cyclic<br>compound        | 0.041517194 | biological_process |
| GO:0006446 | regulation of<br>translational initiation                 | 0.041517194 | biological_process |

|            |                                                            |             |                    |
|------------|------------------------------------------------------------|-------------|--------------------|
| GO:0016607 | nuclear speck                                              | 0.041715635 | cellular_component |
| GO:0035064 | methylated histone<br>binding                              | 0.042193478 | molecular_function |
| GO:0000794 | condensed nuclear<br>chromosome                            | 0.042546738 | cellular_component |
| GO:0046540 | U4/U6 x U5 tri-<br>snRNP complex                           | 0.042546738 | cellular_component |
| GO:0006364 | rRNA processing                                            | 0.044951812 | biological_process |
| GO:0042169 | SH2 domain binding                                         | 0.045037109 | molecular_function |
| GO:0005507 | copper ion binding                                         | 0.045037109 | molecular_function |
| GO:0002376 | immune system<br>process                                   | 0.045211946 | biological_process |
| GO:0009060 | aerobic respiration                                        | 0.045211946 | biological_process |
| GO:0022625 | cytosolic large<br>ribosomal subunit                       | 0.047313886 | cellular_component |
| GO:0005815 | microtubule<br>organizing center                           | 0.047544031 | cellular_component |
| GO:0002020 | protease binding                                           | 0.048780132 | molecular_function |
| GO:0090314 | positive regulation of<br>protein targeting to<br>membrane | 0.049023022 | biological_process |
| GO:0030334 | regulation of cell<br>migration                            | 0.049049454 | biological_process |

---

Table S5 : The KEGG enrichment analysis based on proteome profiling

| Term_ID       | Term_description                            | Enrichment_score | GeneSymbols                                                                | p-value  |
|---------------|---------------------------------------------|------------------|----------------------------------------------------------------------------|----------|
| path:hsa03013 | RNA transport                               | 3.423<br>577     | EIF2B5;UBE2I;EIF5;EIF2S2;EIF4EBP1;EIF2B1;XPOT;EIF1;EIF1AX;GEMIN4;RAN;EIF3F | 0.000189 |
| path:hsa00970 | Aminoacyl-tRNA biosynthesis                 | 6.458<br>111     | GARS;EPRS;NARS;YARS;WARS;TARS                                              | 0.000292 |
| path:hsa03010 | Ribosome                                    | 3.534<br>289     | RPLP1;RPS4X;RPS12;MRPL9;RPS18;RPL11;RPL24;RPL27A;RPL23;RPSA                | 0.000509 |
| path:hsa00230 | Purine metabolism                           | 2.993<br>99      | IMPDH2;POLR2L;ADK;PNP;AK1;HPRT1;ADSSL1;ITPA;NME1;NME7;APRT                 | 0.001087 |
| path:hsa00983 | Drug metabolism - other enzymes             | 4.305<br>407     | IMPDH2;TK1;CDA;HPRT1;ITPA;NME1;NME7                                        | 0.001138 |
| path:hsa04216 | Ferroptosis                                 | 5.919<br>935     | ACSL5;TFRC;HMOX1;FTH1;SLC3A2                                               | 0.001425 |
| path:hsa00270 | Cysteine and methionine metabolism          | 5.038<br>242     | MRI1;CTH;LDHB;AHCY;ADI1                                                    | 0.002951 |
| path:hsa00240 | Pyrimidine metabolism                       | 3.282<br>34      | DTYMK;TK1;POLR2L;PNP;CDA;NME1;NME7                                         | 0.00535  |
| path:hsa00260 | Glycine, serine and threonine metabolism    | 4.735<br>948     | SHMT2;PHGDH;CTH;PSAT1                                                      | 0.009679 |
| path:hsa03060 | Protein export                              | 6.177<br>323     | SEC63;OXA1L;SRPRB                                                          | 0.011992 |
| path:hsa00450 | Selenocompound metabolism                   | 5.571<br>703     | TXNRD1;CTH                                                                 | 0.048962 |
| path:hsa00620 | Pyruvate metabolism                         | 3.551<br>961     | GLO1;ACYP1;LDHB                                                            | 0.051657 |
| path:hsa05012 | Parkinson disease                           | 2.202<br>766     | NDUFS7;HTRA2;PARK7;NDUFAB1;SLC25A6;CYCS                                    | 0.055019 |
| path:hsa00565 | Ether lipid metabolism                      | 3.022<br>945     | PAFAH1B2;PLPP2;PAFAH1B3                                                    | 0.076325 |
| path:hsa00900 | Terpenoid backbone biosynthesis             | 4.305<br>407     | PMVK;FNTA                                                                  | 0.077701 |
| path:hsa00520 | Amino sugar and nucleotide sugar metabolism | 2.959<br>967     | UAP1L1;GMPPA;GNPDA1                                                        | 0.080207 |
| path:hsa00510 | N-Glycan biosynthesis                       | 2.899<br>56      | MGAT1;FUT8;ALG3                                                            | 0.084172 |
| path:hsa05110 | Vibrio cholerae infection                   | 2.841<br>569     | SLC12A2;KDEL3;ATP6V1E1                                                     | 0.088221 |
| path:hsa05014 | Amyotrophic lateral sclerosis (ALS)         | 2.841<br>569     | DERL1;CCS;CYCS                                                             | 0.088221 |
| path:hsa04978 | Mineral absorption                          | 2.785<br>852     | FTH1;MT2A;HMOX1                                                            | 0.09235  |
| path:hsa04146 | Peroxisome                                  | 2.282<br>384     | MPV17L2;PMVK;IDH1;ACSL5                                                    | 0.097991 |

|                   |                                                               |              |                                       |          |
|-------------------|---------------------------------------------------------------|--------------|---------------------------------------|----------|
| path:hsa<br>05134 | Legionellosis                                                 | 2.583<br>244 | C3;CYCS;HSPA8                         | 0.109636 |
| path:hsa<br>00750 | Vitamin B6<br>metabolism                                      | 7.893<br>246 | PSAT1                                 | 0.120228 |
| path:hsa<br>01523 | Antifolate<br>resistance                                      | 3.055<br>45  | SHMT2;GGH                             | 0.138627 |
| path:hsa<br>00020 | Citrate cycle<br>(TCA cycle)                                  | 3.055<br>45  | IDH1;SUCLA2                           | 0.138627 |
| path:hsa<br>05146 | Amoebiasis                                                    | 1.994<br>083 | VCL;COL4A2;HSPB1;SERPINB6             | 0.140794 |
| path:hsa<br>00640 | Propanoate<br>metabolism                                      | 2.959<br>967 | LDHB;SUCLA2                           | 0.145917 |
| path:hsa<br>04215 | Apoptosis -<br>multiple species                               | 2.870<br>271 | HTRA2;CYCS                            | 0.153285 |
| path:hsa<br>05230 | Central carbon<br>metabolism in<br>cancer                     | 2.185<br>822 | IDH1;SLC1A5;SLC7A5                    | 0.15757  |
| path:hsa<br>05131 | Shigellosis                                                   | 2.185<br>822 | VCL;U2AF1L5;CRKL                      | 0.15757  |
| path:hsa<br>00250 | Alanine, aspartate<br>and glutamate<br>metabolism             | 2.706<br>256 | ADSSL1;ASNS                           | 0.168229 |
| path:hsa<br>04145 | Phagosome                                                     | 1.599<br>982 | TUBB;C3;TUBB4B;ATP6V1E1;TFRC          | 0.202883 |
| path:hsa<br>00130 | Ubiquinone and<br>other terpenoid-<br>quinone<br>biosynthesis | 4.305<br>407 | GGCX                                  | 0.209364 |
| path:hsa<br>00860 | Porphyrin and<br>chlorophyll<br>metabolism                    | 2.255<br>213 | HMOX1;EPRS                            | 0.222099 |
| path:hsa<br>00061 | Fatty acid<br>biosynthesis                                    | 3.643<br>037 | ACSL5                                 | 0.242452 |
| path:hsa<br>00190 | Oxidative<br>phosphorylation                                  | 1.578<br>649 | NDUFAB1;NDUFS7;PPA1;ATP6V1E1          | 0.247698 |
| path:hsa<br>00533 | Glycosaminoglyca<br>n biosynthesis -<br>keratan sulfate       | 3.382<br>82  | FUT8                                  | 0.258476 |
| path:hsa<br>00600 | Sphingolipid<br>metabolism                                    | 2.015<br>297 | PLPP2;SGPL1                           | 0.261369 |
| path:hsa<br>04012 | ErbB signaling<br>pathway                                     | 1.671<br>511 | CRKL;PAK4;EIF4EBP1                    | 0.267017 |
| path:hsa<br>05164 | Influenza A                                                   | 1.401<br>168 | STAT2;SLC25A6;CYCS;HSPA8;KPN<br>A2    | 0.285607 |
| path:hsa<br>05170 | Human<br>immunodeficiency<br>virus 1 infection                | 1.346<br>715 | CRKL;PAK4;APOBEC3B;CYCS;BST<br>2;CFL1 | 0.286994 |
| path:hsa<br>00730 | Thiamine<br>metabolism                                        | 2.959<br>967 | AK1                                   | 0.289522 |
| path:hsa<br>04974 | Protein digestion<br>and absorption                           | 1.578<br>649 | COL4A2;SLC3A2;SLC1A5                  | 0.295867 |
| path:hsa<br>04666 | Fc gamma R-<br>mediated<br>phagocytosis                       | 1.578<br>649 | PLPP2;CFL1;CRKL                       | 0.295867 |
| path:hsa          | Phenylalanine                                                 | 2.785        | MIF                                   | 0.304557 |

|                   |                                                   |              |                                        |          |
|-------------------|---------------------------------------------------|--------------|----------------------------------------|----------|
| 00360             | metabolism                                        | 852          |                                        |          |
| path:hsa<br>00480 | Glutathione<br>metabolism                         | 1.787<br>15  | GGCT;IDH1                              | 0.308544 |
| path:hsa<br>03040 | Spliceosome                                       | 1.424<br>345 | U2AF1L5;SNRPE;LSM3;HSPA8               | 0.308993 |
| path:hsa<br>04120 | Ubiquitin<br>mediated<br>proteolysis              | 1.392<br>926 | UBE3C;UBE2Q1;UBE4A;UBE2I               | 0.323396 |
| path:hsa<br>05130 | Pathogenic<br>Escherichia coli<br>infection       | 1.722<br>163 | TUBB4B;TUBB                            | 0.324166 |
| path:hsa<br>00770 | Pantothenate and<br>CoA biosynthesis              | 2.492<br>604 | PPCS                                   | 0.333685 |
| path:hsa<br>00670 | One carbon pool<br>by folate                      | 2.367<br>974 | SHMT2                                  | 0.347791 |
| path:hsa<br>04066 | HIF-1 signaling<br>pathway                        | 1.420<br>784 | TFRC;HMOX1;EIF4EBP1                    | 0.353957 |
| path:hsa<br>00310 | Lysine<br>degradation                             | 1.605<br>406 | NSD1;SETD7                             | 0.355122 |
| path:hsa<br>05016 | Huntington<br>disease                             | 1.266<br>296 | NDUFS7;POLR2L;NDUFAB1;SLC25<br>A6;CYCS | 0.360793 |
| path:hsa<br>00561 | Glycerolipid<br>metabolism                        | 1.552<br>77  | GK;PLPP2                               | 0.370418 |
| path:hsa<br>03430 | Mismatch repair                                   | 2.059<br>108 | LIG1                                   | 0.388355 |
| path:hsa<br>05206 | MicroRNAs in<br>cancer                            | 1.262<br>919 | UBE2I;CRKL;HMOX1;PAK4                  | 0.390917 |
| path:hsa<br>04150 | mTOR signaling<br>pathway                         | 1.254<br>556 | SLC3A2;SLC7A5;ATP6V1E1;EIF4EB<br>P1    | 0.395726 |
| path:hsa<br>04510 | Focal adhesion                                    | 1.189<br>937 | FLNA;PAK4;COL4A2;VCL;CRKL              | 0.411444 |
| path:hsa<br>00790 | Folate<br>biosynthesis                            | 1.821<br>518 | GGH                                    | 0.42641  |
| path:hsa<br>04218 | Cellular<br>senescence                            | 1.198<br>974 | MCU;SLC25A6;SQSTM1;EIF4EBP1            | 0.429198 |
| path:hsa<br>05211 | Renal cell<br>carcinoma                           | 1.372<br>738 | CRKL;PAK4                              | 0.43003  |
| path:hsa<br>04966 | Collecting duct<br>acid secretion                 | 1.754<br>055 | ATP6V1E1                               | 0.438565 |
| path:hsa<br>01040 | Biosynthesis of<br>unsaturated fatty<br>acids     | 1.754<br>055 | HSD17B12                               | 0.438565 |
| path:hsa<br>04217 | Necroptosis                                       | 1.169<br>37  | STAT2;SLC25A6;SQSTM1;FTH1              | 0.448121 |
| path:hsa<br>04141 | Protein processing<br>in endoplasmic<br>reticulum | 1.155<br>109 | DERL1;UBQLN1;HSPA8;SEC63               | 0.457512 |
| path:hsa<br>05010 | Alzheimer disease                                 | 1.155<br>109 | NDUFS7;NDUFAB1;CDK5;CYCS               | 0.457512 |
| path:hsa<br>05100 | Bacterial invasion<br>of epithelial cells         | 1.279<br>986 | VCL;CRKL                               | 0.465763 |
| path:hsa<br>00562 | Inositol phosphate<br>metabolism                  | 1.279<br>986 | INPP1;PI4KB                            | 0.465763 |
| path:hsa<br>03320 | PPAR signaling<br>pathway                         | 1.279<br>986 | GK;ACSL5                               | 0.465763 |

|                   |                                                 |              |                       |          |
|-------------------|-------------------------------------------------|--------------|-----------------------|----------|
| path:hsa<br>00062 | Fatty acid<br>elongation                        | 1.578<br>649 | HSD17B12              | 0.473516 |
| path:hsa<br>00630 | Glyoxylate and<br>dicarboxylate<br>metabolism   | 1.578<br>649 | SHMT2                 | 0.473516 |
| path:hsa<br>00030 | Pentose phosphate<br>pathway                    | 1.578<br>649 | TALDO1                | 0.473516 |
| path:hsa<br>00760 | Nicotinate and<br>nicotinamide<br>metabolism    | 1.578<br>649 | PNP                   | 0.473516 |
| path:hsa<br>05133 | Pertussis                                       | 1.246<br>302 | CFL1;C3               | 0.479686 |
| path:hsa<br>03020 | RNA polymerase                                  | 1.527<br>725 | POLR2L                | 0.484679 |
| path:hsa<br>03018 | RNA degradation                                 | 1.198<br>974 | DHX36;LSM3            | 0.500153 |
| path:hsa<br>00051 | Fructose and<br>mannose<br>metabolism           | 1.435<br>136 | GMPPA                 | 0.506305 |
| path:hsa<br>03410 | Base excision<br>repair                         | 1.435<br>136 | LIG1                  | 0.506305 |
| path:hsa<br>03008 | Ribosome<br>biogenesis in<br>eukaryotes         | 1.169<br>37  | RAN;UTP4              | 0.51351  |
| path:hsa<br>05143 | African<br>trypanosomiasis                      | 1.392<br>926 | HBB                   | 0.516777 |
| path:hsa<br>05162 | Measles                                         | 1.084<br>568 | STAT2;RACK1;HSPA8     | 0.526044 |
| path:hsa<br>03030 | DNA replication                                 | 1.315<br>541 | LIG1                  | 0.537063 |
| path:hsa<br>00350 | Tyrosine<br>metabolism                          | 1.315<br>541 | MIF                   | 0.537063 |
| path:hsa<br>04210 | Apoptosis                                       | 1.052<br>433 | HTRA2;CTSD;CYCS       | 0.546492 |
| path:hsa<br>05418 | Fluid shear stress<br>and<br>atherosclerosis    | 1.044<br>694 | TXN;SQSTM1;HMOX1      | 0.551524 |
| path:hsa<br>04915 | Estrogen signaling<br>pathway                   | 1.044<br>694 | KRT17;CTSD;HSPA8      | 0.551524 |
| path:hsa<br>04910 | Insulin signaling<br>pathway                    | 1.037<br>069 | PRKAR2A;CRKL;EIF4EBP1 | 0.556524 |
| path:hsa<br>04540 | Gap junction                                    | 1.076<br>352 | TUBB4B;TUBB           | 0.558387 |
| path:hsa<br>04975 | Fat digestion and<br>absorption                 | 1.155<br>109 | PLPP2                 | 0.584154 |
| path:hsa<br>05222 | Small cell lung<br>cancer                       | 1.018<br>483 | COL4A2;CYCS           | 0.588611 |
| path:hsa<br>04932 | Non-alcoholic<br>fatty liver disease<br>(NAFLD) | 0.979<br>851 | NDUFAB1;NDUFS7;CYCS   | 0.595308 |
| path:hsa<br>00071 | Fatty acid<br>degradation                       | 1.076<br>352 | ACSL5                 | 0.610091 |
| path:hsa<br>03022 | Basal transcription<br>factors                  | 1.076<br>352 | TAF15                 | 0.610091 |
| path:hsa          | Vasopressin-                                    | 1.076        | DYNLL2                | 0.610091 |

|                   |                                                 |              |                            |          |
|-------------------|-------------------------------------------------|--------------|----------------------------|----------|
| 04962             | regulated water reabsorption                    | 352          |                            |          |
| path:hsa<br>03050 | Proteasome                                      | 1.052<br>433 | PSMF1                      | 0.618374 |
| path:hsa<br>05231 | Choline metabolism in cancer                    | 0.956<br>757 | PLPP2;EIF4EBP1             | 0.622835 |
| path:hsa<br>04070 | Phosphatidylinositol signaling system           | 0.956<br>757 | INPP1;PI4KB                | 0.622835 |
| path:hsa<br>03420 | Nucleotide excision repair                      | 1.029<br>554 | LIG1                       | 0.626482 |
| path:hsa<br>04330 | Notch signaling pathway                         | 0.986<br>656 | NUMB                       | 0.642189 |
| path:hsa<br>05030 | Cocaine addiction                               | 0.966<br>52  | CDK5                       | 0.649795 |
| path:hsa<br>05144 | Malaria                                         | 0.966<br>52  | HBB                        | 0.649795 |
| path:hsa<br>04810 | Regulation of actin cytoskeleton                | 0.889<br>38  | VCL;CRKL;CFL1;PAK4         | 0.663739 |
| path:hsa<br>05150 | Staphylococcus aureus infection                 | 0.910<br>759 | C3                         | 0.671661 |
| path:hsa<br>04714 | Thermogenesis                                   | 0.877<br>027 | NDUFAB1;NDUFS7;COX20;ACSL5 | 0.674508 |
| path:hsa<br>05145 | Toxoplasmosis                                   | 0.853<br>324 | CYCS;HSPA8                 | 0.684652 |
| path:hsa<br>04621 | NOD-like receptor signaling pathway             | 0.850<br>769 | TXN;MCU;STAT2              | 0.690188 |
| path:hsa<br>05416 | Viral myocarditis                               | 0.845<br>705 | CYCS                       | 0.69872  |
| path:hsa<br>04071 | Sphingolipid signaling pathway                  | 0.802<br>703 | CTSD;SGPL1                 | 0.716754 |
| path:hsa<br>04370 | VEGF signaling pathway                          | 0.802<br>703 | HSPB1                      | 0.71755  |
| path:hsa<br>04360 | Axon guidance                                   | 0.811<br>877 | CDK5;CFL1;PAK4             | 0.720302 |
| path:hsa<br>05152 | Tuberculosis                                    | 0.811<br>877 | C3;CYCS;CTSD               | 0.720302 |
| path:hsa<br>00140 | Steroid hormone biosynthesis                    | 0.789<br>325 | HSD17B12                   | 0.723563 |
| path:hsa<br>04152 | AMPK signaling pathway                          | 0.789<br>325 | EEF2;EIF4EBP1              | 0.725411 |
| path:hsa<br>04213 | Longevity regulating pathway - multiple species | 0.763<br>863 | HSPA8                      | 0.73521  |
| path:hsa<br>04623 | Cytosolic DNA-sensing pathway                   | 0.763<br>863 | POLR2L                     | 0.73521  |
| path:hsa<br>00590 | Arachidonic acid metabolism                     | 0.751<br>738 | PTGES3                     | 0.740849 |
| path:hsa<br>04721 | Synaptic vesicle cycle                          | 0.751<br>738 | ATP6V1E1                   | 0.740849 |
| path:hsa<br>04380 | Osteoclast differentiation                      | 0.757<br>752 | STAT2;SQSTM1               | 0.746086 |
| path:hsa          | Herpes simplex                                  | 0.776        | STAT2;C3;CYCS              | 0.748115 |

|                   |                                                                     |              |                  |          |
|-------------------|---------------------------------------------------------------------|--------------|------------------|----------|
| 05168             | infection                                                           | 385          |                  |          |
| path:hsa<br>04137 | Mitophagy -<br>animal                                               | 0.728<br>607 | SQSTM1           | 0.751772 |
| path:hsa<br>05202 | Transcriptional<br>misregulation in<br>cancer                       | 0.767<br>992 | FUT8;MLLT1;TAF15 | 0.754716 |
| path:hsa<br>05221 | Acute myeloid<br>leukemia                                           | 0.717<br>568 | EIF4EBP1         | 0.757061 |
| path:hsa<br>05167 | Kaposi sarcoma-<br>associated<br>herpesvirus<br>infection           | 0.763<br>863 | STAT2;C3;CYCS    | 0.757965 |
| path:hsa<br>05322 | Systemic lupus<br>erythematosus                                     | 0.728<br>607 | C3;HIST3H2BB     | 0.765421 |
| path:hsa<br>05120 | Epithelial cell<br>signaling in<br>Helicobacter<br>pylori infection | 0.696<br>463 | ATP6V1E1         | 0.767305 |
| path:hsa<br>04920 | Adipocytokine<br>signaling pathway                                  | 0.686<br>369 | ACSL5            | 0.772265 |
| path:hsa<br>00010 | Glycolysis /<br>Gluconeogenesis                                     | 0.686<br>369 | LDHB             | 0.772265 |
| path:hsa<br>04612 | Antigen<br>processing and<br>presentation                           | 0.686<br>369 | HSPA8            | 0.772265 |
| path:hsa<br>05140 | Leishmaniasis                                                       | 0.676<br>564 | C3               | 0.77712  |
| path:hsa<br>01524 | Platinum drug<br>resistance                                         | 0.667<br>035 | CYCS             | 0.781872 |
| path:hsa<br>04115 | p53 signaling<br>pathway                                            | 0.657<br>771 | CYCS             | 0.786523 |
| path:hsa<br>04520 | Adherens junction                                                   | 0.657<br>771 | VCL              | 0.786523 |
| path:hsa<br>00980 | Metabolism of<br>xenobiotics by<br>cytochrome P450                  | 0.657<br>771 | AKR7A2           | 0.786523 |
| path:hsa<br>04723 | Retrograde<br>endocannabinoid<br>signaling                          | 0.671<br>766 | NDUFAB1;NDUFS7   | 0.803529 |
| path:hsa<br>05220 | Chronic myeloid<br>leukemia                                         | 0.623<br>151 | CRKL             | 0.804164 |
| path:hsa<br>05161 | Hepatitis B                                                         | 0.662<br>37  | STAT2;CYCS       | 0.809841 |
| path:hsa<br>01521 | EGFR tyrosine<br>kinase inhibitor<br>resistance                     | 0.599<br>487 | EIF4EBP1         | 0.816437 |
| path:hsa<br>04610 | Complement and<br>coagulation<br>cascades                           | 0.599<br>487 | C3               | 0.816437 |
| path:hsa<br>04512 | ECM-receptor<br>interaction                                         | 0.577<br>555 | COL4A2           | 0.827945 |
| path:hsa<br>05132 | Salmonella<br>infection                                             | 0.563<br>803 | FLNA             | 0.835216 |
| path:hsa<br>04911 | Insulin secretion                                                   | 0.557<br>17  | GLP1R            | 0.838736 |



|                   |                                                               |              |                       |          |
|-------------------|---------------------------------------------------------------|--------------|-----------------------|----------|
| path:hsa<br>05323 | Rheumatoid<br>arthritis                                       | 0.550<br>692 | ATP6V1E1              | 0.842182 |
| path:hsa<br>05210 | Colorectal cancer                                             | 0.550<br>692 | CYCS                  | 0.842182 |
| path:hsa<br>04211 | Longevity<br>regulating<br>pathway                            | 0.532<br>129 | EIF4EBP1              | 0.852086 |
| path:hsa<br>04970 | Salivary secretion                                            | 0.526<br>216 | SLC12A2               | 0.855248 |
| path:hsa<br>05163 | Human<br>cytomegalovirus<br>infection                         | 0.637<br>123 | CRKL;CYCS;EIF4EBP1    | 0.855615 |
| path:hsa<br>04064 | NF-kappa B<br>signaling pathway                               | 0.509<br>242 | UBE2I                 | 0.864337 |
| path:hsa<br>04640 | Hematopoietic cell<br>lineage                                 | 0.503<br>824 | TFRC                  | 0.867238 |
| path:hsa<br>05225 | Hepatocellular<br>carcinoma                                   | 0.574<br>054 | TXNRD1;HMOX1          | 0.868238 |
| path:hsa<br>00564 | Glycerophospholi<br>pid metabolism                            | 0.488<br>242 | PLPP2                 | 0.875579 |
| path:hsa<br>04010 | MAPK signaling<br>pathway                                     | 0.642<br>162 | HSPB1;CRKL;FLNA;HSPA8 | 0.876041 |
| path:hsa<br>04972 | Pancreatic<br>secretion                                       | 0.483<br>26  | SLC12A2               | 0.878242 |
| path:hsa<br>04914 | Progesterone-<br>mediated oocyte<br>maturation                | 0.478<br>379 | KIF22                 | 0.880848 |
| path:hsa<br>04933 | AGE-RAGE<br>signaling pathway<br>in diabetic<br>complications | 0.478<br>379 | COL4A2                | 0.880848 |
| path:hsa<br>05142 | Chagas disease<br>(American<br>trypanosomiasis)               | 0.468<br>906 | C3                    | 0.885895 |
| path:hsa<br>04660 | T cell receptor<br>signaling pathway                          | 0.468<br>906 | PAK4                  | 0.885895 |
| path:hsa<br>04922 | Glucagon<br>signaling pathway                                 | 0.459<br>801 | LDHB                  | 0.89073  |
| path:hsa<br>04625 | C-type lectin<br>receptor signaling<br>pathway                | 0.455<br>38  | STAT2                 | 0.89307  |
| path:hsa<br>04144 | Endocytosis                                                   | 0.582<br>289 | ARF3;TFRC;HSPA8       | 0.894214 |
| path:hsa<br>04020 | Calcium signaling<br>pathway                                  | 0.520<br>434 | MCU;SLC25A6           | 0.901611 |
| path:hsa<br>05166 | Human T-cell<br>leukemia virus 1<br>infection                 | 0.561<br>575 | RAN;BUB1B;SLC25A6     | 0.907738 |
| path:hsa<br>04062 | Chemokine<br>signaling pathway                                | 0.506<br>518 | STAT2;CRKL            | 0.909824 |
| path:hsa<br>04670 | Leukocyte<br>transendothelial<br>migration                    | 0.422<br>852 | VCL                   | 0.910087 |
| path:hsa<br>04722 | Neurotrophin<br>signaling pathway                             | 0.397<br>979 | CRKL                  | 0.922752 |

|                   |                                               |              |                                         |          |
|-------------------|-----------------------------------------------|--------------|-----------------------------------------|----------|
| path:hsa<br>05169 | Epstein-Barr virus<br>infection               | 0.478<br>379 | STAT2;CYCS                              | 0.925697 |
| path:hsa<br>05203 | Viral<br>carcinogenesis                       | 0.473<br>595 | C3;HIST3H2BB                            | 0.928286 |
| path:hsa<br>04142 | Lysosome                                      | 0.385<br>036 | CTSD                                    | 0.929176 |
| path:hsa<br>04110 | Cell cycle                                    | 0.381<br>931 | BUB1B                                   | 0.930698 |
| path:hsa<br>05165 | Human<br>papillomavirus<br>infection          | 0.558<br>814 | STAT2;COL4A2;ATP6V1E1;EIF4EBP<br>1      | 0.932781 |
| path:hsa<br>04140 | Autophagy -<br>animal                         | 0.369<br>996 | CTSD                                    | 0.936465 |
| path:hsa<br>04926 | Relaxin signaling<br>pathway                  | 0.364<br>304 | COL4A2                                  | 0.939167 |
| path:hsa<br>05160 | Hepatitis C                                   | 0.361<br>523 | STAT2                                   | 0.940475 |
| path:hsa<br>04068 | FoxO signaling<br>pathway                     | 0.358<br>784 | SETD7                                   | 0.941755 |
| path:hsa<br>04072 | Phospholipase D<br>signaling pathway          | 0.326<br>617 | PLPP2                                   | 0.956106 |
| path:hsa<br>04921 | Oxytocin<br>signaling pathway                 | 0.311<br>576 | EEF2                                    | 0.962316 |
| path:hsa<br>05200 | Pathways in<br>cancer                         | 0.543<br>321 | STAT2;TXNRD1;COL4A2;HMOX1;C<br>YCS;CRKL | 0.969443 |
| path:hsa<br>04630 | Jak-STAT<br>signaling pathway                 | 0.292<br>342 | STAT2                                   | 0.969703 |
| path:hsa<br>04022 | cGMP-PKG<br>signaling pathway                 | 0.290<br>549 | SLC25A6                                 | 0.970357 |
| path:hsa<br>05034 | Alcoholism                                    | 0.263<br>108 | HIST3H2BB                               | 0.979559 |
| path:hsa<br>05205 | Proteoglycans in<br>cancer                    | 0.239<br>189 | FLNA                                    | 0.986222 |
| path:hsa<br>04024 | cAMP signaling<br>pathway                     | 0.237<br>987 | GLP1R                                   | 0.986521 |
| path:hsa<br>04015 | Rap1 signaling<br>pathway                     | 0.229<br>9   | CRKL                                    | 0.988442 |
| path:hsa<br>04014 | Ras signaling<br>pathway                      | 0.204<br>136 | PAK4                                    | 0.993479 |
| path:hsa<br>04151 | PI3K-Akt<br>signaling pathway                 | 0.268<br>326 | COL4A2;EIF4EBP1                         | 0.996019 |
| path:hsa<br>04080 | Neuroactive<br>ligand-receptor<br>interaction | 0.155<br>277 | GLP1R                                   | 0.998707 |

The raw data of metabolomics and proteomics were uploaded as well.

The contents are listed below:

metabonomic raw data-negative-hilic-blank-fa30.xlsx

metabonomic raw data-negative-reverse phase-blank-fa30.xlsx

metabonomic raw data-positive-hilic-blank-fa30.xlsx

metabonomic raw data- positive -reverse phase-blank-fa30.xlsx

proteomics data-iTRAQ 8plex -blank-fa30.xlsx

Mendeley Data repository (wang, dongyao (2022), “Metabolomics and Proteomics Research of FA-30”, Mendeley Data, V1, doi: 10.17632/mkrzs2rsm4.1).
